# Supplementary material for: Evolution of the cytochrome bd oxygen reductase superfamily and the function of CydAA’ in Archaea
Source: Springer Nature journal article supplement (doi:10.1038/s41396-021-01019-4), 2021-06-18
Supplement: MOESM3 [file 41396_2021_1019_MOESM3_ESM.xlsx]

## Sheet: bd_all_gtdb_sequences_filtered_
Genome	Domain	Phylum	Class	Order	Family	Genus	Species	qOR1	qOR1*	qOR2	qOR3	qOR4a	qOR4b	OR-C	OR-N	Total
RS_GCF_002261265.1	d__Bacteria	p__Proteobacteria	c__Gammaproteobacteria	o__Burkholderiales	f__Burkholderiaceae	g__Bordetella_A	s__Bordetella_A sp002261265	3	1	0	0	0	0	0	0	4
RS_GCF_900078335.1	d__Bacteria	p__Proteobacteria	c__Gammaproteobacteria	o__Burkholderiales	f__Burkholderiaceae	g__Bordetella	s__Bordetella trematum	3	1	0	0	0	0	0	0	4
RS_GCF_000988095.1	d__Bacteria	p__Proteobacteria	c__Gammaproteobacteria	o__Burkholderiales	f__Burkholderiaceae	g__Kerstersia	s__Kerstersia gyiorum	3	1	0	0	0	0	0	0	4
RS_GCF_002812705.1	d__Bacteria	p__Proteobacteria	c__Gammaproteobacteria	o__Burkholderiales	f__Burkholderiaceae	g__Achromobacter	s__Achromobacter spanius	2	1	0	0	0	0	0	0	3
RS_GCF_001676705.1	d__Bacteria	p__Proteobacteria	c__Gammaproteobacteria	o__Burkholderiales	f__Burkholderiaceae	g__Bordetella_C	s__Bordetella_C bronchialis	2	1	0	0	0	0	0	0	3
RS_GCF_002885955.2	d__Bacteria	p__Proteobacteria	c__Gammaproteobacteria	o__Burkholderiales	f__Burkholderiaceae	g__Achromobacter	s__Achromobacter pulmonis	2	1	0	0	0	0	0	0	3
RS_GCF_002261345.1	d__Bacteria	p__Proteobacteria	c__Gammaproteobacteria	o__Burkholderiales	f__Burkholderiaceae	g__Bordetella_A	s__Bordetella_A sp002261345	2	1	0	0	0	0	0	0	3
GB_GCA_000974745.1	d__Bacteria	p__Proteobacteria	c__Gammaproteobacteria	o__Burkholderiales	f__Burkholderiaceae	g__Achromobacter	s__Achromobacter bronchiseptica	2	1	0	0	0	0	0	0	3
RS_GCF_001557875.1	d__Bacteria	p__Proteobacteria	c__Gammaproteobacteria	o__Enterobacterales	f__Vibrionaceae	g__Vibrio	s__Vibrio splendidus_F	2	1	0	0	0	0	0	0	3
RS_GCF_000236785.1	d__Bacteria	p__Proteobacteria	c__Gammaproteobacteria	o__Burkholderiales	f__Burkholderiaceae	g__Achromobacter	s__Achromobacter arsenitoxydans	2	1	0	0	0	0	0	0	3
RS_GCF_001457475.1	d__Bacteria	p__Proteobacteria	c__Gammaproteobacteria	o__Burkholderiales	f__Burkholderiaceae	g__Achromobacter	s__Achromobacter xylosoxidans	2	1	0	0	0	0	0	0	3
RS_GCF_001571245.1	d__Bacteria	p__Proteobacteria	c__Gammaproteobacteria	o__Burkholderiales	f__Burkholderiaceae	g__Achromobacter	s__Achromobacter piechaudii	2	1	0	0	0	0	0	0	3
RS_GCF_002261425.1	d__Bacteria	p__Proteobacteria	c__Gammaproteobacteria	o__Burkholderiales	f__Burkholderiaceae	g__Bordetella_C	s__Bordetella_C sp002261425	2	1	0	0	0	0	0	0	3
RS_GCF_001592225.1	d__Bacteria	p__Proteobacteria	c__Gammaproteobacteria	o__Burkholderiales	f__Burkholderiaceae	g__Castellaniella	s__Castellaniella caeni	2	1	0	0	0	0	0	0	3
RS_GCF_002975275.1	d__Bacteria	p__Proteobacteria	c__Gammaproteobacteria	o__Burkholderiales	f__Burkholderiaceae	g__Achromobacter	s__Achromobacter sp002975275	2	1	0	0	0	0	0	0	3
RS_GCF_003053425.1	d__Bacteria	p__Proteobacteria	c__Gammaproteobacteria	o__Burkholderiales	f__Burkholderiaceae	g__Achromobacter	s__Achromobacter mucicolens	2	1	0	0	0	0	0	0	3
RS_GCF_001270295.1	d__Bacteria	p__Proteobacteria	c__Gammaproteobacteria	o__Burkholderiales	f__Burkholderiaceae	g__Achromobacter	s__Achromobacter sp001270295	2	1	0	0	0	0	0	0	3
RS_GCF_002082135.1	d__Bacteria	p__Proteobacteria	c__Gammaproteobacteria	o__Burkholderiales	f__Burkholderiaceae	g__Achromobacter	s__Achromobacter ruhlandii	2	1	0	0	0	0	0	0	3
RS_GCF_001189595.1	d__Bacteria	p__Proteobacteria	c__Gammaproteobacteria	o__Burkholderiales	f__Burkholderiaceae	g__Achromobacter	s__Achromobacter spanius_C	2	1	0	0	0	0	0	0	3
RS_GCF_001298955.1	d__Bacteria	p__Proteobacteria	c__Gammaproteobacteria	o__Burkholderiales	f__Burkholderiaceae	g__Achromobacter	s__Achromobacter sp001298955	2	1	0	0	0	0	0	0	3
GB_GCA_002331005.1	d__Bacteria	p__Proteobacteria	c__Gammaproteobacteria	o__Burkholderiales	f__Burkholderiaceae	g__Achromobacter	s__Achromobacter sp002331005	2	1	0	0	0	0	0	0	3
RS_GCF_002192695.1	d__Bacteria	p__Proteobacteria	c__Gammaproteobacteria	o__Burkholderiales	f__Burkholderiaceae	g__Achromobacter	s__Achromobacter xylosoxidans_C	2	1	0	0	0	0	0	0	3
RS_GCF_002119665.1	d__Bacteria	p__Proteobacteria	c__Gammaproteobacteria	o__Burkholderiales	f__Burkholderiaceae	g__Bordetella_B	s__Bordetella_B sp002119665	2	1	0	0	0	0	0	0	3
RS_GCF_001428845.1	d__Bacteria	p__Proteobacteria	c__Gammaproteobacteria	o__Burkholderiales	f__Burkholderiaceae	g__Achromobacter	s__Achromobacter sp001428845	2	1	0	0	0	0	0	0	3
RS_GCF_002261225.1	d__Bacteria	p__Proteobacteria	c__Gammaproteobacteria	o__Burkholderiales	f__Burkholderiaceae	g__Bordetella_C	s__Bordetella_C sp002261225	2	1	0	0	0	0	0	0	3
RS_GCF_001299435.1	d__Bacteria	p__Proteobacteria	c__Gammaproteobacteria	o__Burkholderiales	f__Burkholderiaceae	g__Achromobacter	s__Achromobacter sp001299435	2	1	0	0	0	0	0	0	3
RS_GCF_002209485.1	d__Bacteria	p__Proteobacteria	c__Gammaproteobacteria	o__Burkholderiales	f__Burkholderiaceae	g__Bordetella_C	s__Bordetella_C sp002209485	2	1	0	0	0	0	0	0	3
RS_GCF_002261215.1	d__Bacteria	p__Proteobacteria	c__Gammaproteobacteria	o__Burkholderiales	f__Burkholderiaceae	g__Bordetella_C	s__Bordetella_C sp002261215	2	1	0	0	0	0	0	0	3
RS_GCF_002209555.1	d__Bacteria	p__Proteobacteria	c__Gammaproteobacteria	o__Burkholderiales	f__Burkholderiaceae	g__Achromobacter	s__Achromobacter insolitus	2	1	0	0	0	0	0	0	3
RS_GCF_002902905.1	d__Bacteria	p__Proteobacteria	c__Gammaproteobacteria	o__Burkholderiales	f__Burkholderiaceae	g__Achromobacter	s__Achromobacter sp002902905	2	1	0	0	0	0	0	0	3
RS_GCF_002119685.1	d__Bacteria	p__Proteobacteria	c__Gammaproteobacteria	o__Burkholderiales	f__Burkholderiaceae	g__Bordetella_C	s__Bordetella_C sp002119685	2	1	0	0	0	0	0	0	3
RS_GCF_001433395.1	d__Bacteria	p__Proteobacteria	c__Gammaproteobacteria	o__Burkholderiales	f__Burkholderiaceae	g__Bordetella_C	s__Bordetella_C sp001433395	2	1	0	0	0	0	0	0	3
RS_GCF_000165835.1	d__Bacteria	p__Proteobacteria	c__Gammaproteobacteria	o__Burkholderiales	f__Burkholderiaceae	g__Achromobacter	s__Achromobacter xylosoxidans_B	2	1	0	0	0	0	0	0	3
RS_GCF_000633435.1	d__Bacteria	p__Proteobacteria	c__Gammaproteobacteria	o__Burkholderiales	f__Burkholderiaceae	g__Achromobacter	s__Achromobacter sp000633435	2	1	0	0	0	0	0	0	3
RS_GCF_002926155.1	d__Bacteria	p__Proteobacteria	c__Gammaproteobacteria	o__Burkholderiales	f__Burkholderiaceae	g__Achromobacter	s__Achromobacter spanius_B	2	1	0	0	0	0	0	0	3
RS_GCF_001644025.1	d__Bacteria	p__Proteobacteria	c__Gammaproteobacteria	o__Methylococcales	f__Methylomonadaceae	g__Methylomonas	s__Methylomonas koyamae_A	1	1	0	0	0	0	1	0	3
RS_GCF_000067205.1	d__Bacteria	p__Proteobacteria	c__Gammaproteobacteria	o__Burkholderiales	f__Burkholderiaceae	g__Bordetella_A	s__Bordetella_A petrii	2	1	0	0	0	0	0	0	3
GB_GCA_003096295.1	d__Bacteria	p__Proteobacteria	c__Gammaproteobacteria	o__Burkholderiales	f__Burkholderiaceae	g__Achromobacter	s__Achromobacter dolens	2	1	0	0	0	0	0	0	3
RS_GCF_000070465.1	d__Bacteria	p__Proteobacteria	c__Gammaproteobacteria	o__Burkholderiales	f__Burkholderiaceae	g__Bordetella	s__Bordetella avium	2	1	0	0	0	0	0	0	3
RS_GCF_001299355.1	d__Bacteria	p__Proteobacteria	c__Gammaproteobacteria	o__Burkholderiales	f__Burkholderiaceae	g__Achromobacter	s__Achromobacter sp001299355	2	1	0	0	0	0	0	0	3
RS_GCF_000757485.1	d__Bacteria	p__Proteobacteria	c__Gammaproteobacteria	o__Burkholderiales	f__Burkholderiaceae	g__Achromobacter	s__Achromobacter sp000757485	2	1	0	0	0	0	0	0	3
RS_GCF_000382185.1	d__Bacteria	p__Proteobacteria	c__Gammaproteobacteria	o__Burkholderiales	f__Burkholderiaceae	g__Bordetella_B	s__Bordetella_B sp000382185	1	1	0	0	0	0	1	0	3
RS_GCF_002209535.1	d__Bacteria	p__Proteobacteria	c__Gammaproteobacteria	o__Burkholderiales	f__Burkholderiaceae	g__Achromobacter	s__Achromobacter marplatensis	2	1	0	0	0	0	0	0	3
RS_GCF_001571365.1	d__Bacteria	p__Proteobacteria	c__Gammaproteobacteria	o__Burkholderiales	f__Burkholderiaceae	g__Achromobacter	s__Achromobacter denitrificans	2	1	0	0	0	0	0	0	3
GB_GCA_003096315.1	d__Bacteria	p__Proteobacteria	c__Gammaproteobacteria	o__Burkholderiales	f__Burkholderiaceae	g__Achromobacter	s__Achromobacter insuavis	2	1	0	0	0	0	0	0	3
RS_GCF_003123725.1	d__Bacteria	p__Proteobacteria	c__Gammaproteobacteria	o__Burkholderiales	f__Burkholderiaceae	g__QETA01	s__QETA01 sp003123725	2	1	0	0	0	0	0	0	3
RS_GCF_000019185.1	d__Bacteria	p__Proteobacteria	c__Gammaproteobacteria	o__Enterobacterales	f__Shewanellaceae	g__Shewanella	s__Shewanella halifaxensis	1	1	0	0	0	0	0	0	2
RS_GCF_002119725.1	d__Bacteria	p__Proteobacteria	c__Gammaproteobacteria	o__Burkholderiales	f__Burkholderiaceae	g__Bordetella_C	s__Bordetella_C sp002119725	1	1	0	0	0	0	0	0	2
RS_GCF_001704295.1	d__Bacteria	p__Proteobacteria	c__Gammaproteobacteria	o__Burkholderiales	f__Burkholderiaceae	g__Bordetella_C	s__Bordetella_C sp001704295	1	1	0	0	0	0	0	0	2
RS_GCF_001312005.1	d__Bacteria	p__Proteobacteria	c__Gammaproteobacteria	o__Methylococcales	f__Methylomonadaceae	g__Methylomonas	s__Methylomonas koyamae	1	1	0	0	0	0	0	0	2
RS_GCF_002261335.1	d__Bacteria	p__Proteobacteria	c__Gammaproteobacteria	o__Burkholderiales	f__Burkholderiaceae	g__Bordetella	s__Bordetella sp002261335	1	1	0	0	0	0	0	0	2
GB_GCA_002359265.1	d__Bacteria	p__Proteobacteria	c__Gammaproteobacteria	o__Burkholderiales	f__Burkholderiaceae	g__Pusillimonas	s__Pusillimonas sp002359265	1	1	0	0	0	0	0	0	2
RS_GCF_000506985.1	d__Bacteria	p__Proteobacteria	c__Gammaproteobacteria	o__Burkholderiales	f__Burkholderiaceae	g__Advenella	s__Advenella kashmirensis_A	1	1	0	0	0	0	0	0	2
GB_GCA_002384935.1	d__Bacteria	p__Proteobacteria	c__Gammaproteobacteria	o__Burkholderiales	f__Burkholderiaceae	g__Pusillimonas	s__Pusillimonas sp002384935	1	1	0	0	0	0	0	0	2
RS_GCF_000612685.1	d__Bacteria	p__Proteobacteria	c__Gammaproteobacteria	o__Burkholderiales	f__Burkholderiaceae	g__Castellaniella	s__Castellaniella defragrans	1	1	0	0	0	0	0	0	2
GB_GCA_002421865.1	d__Bacteria	p__Proteobacteria	c__Gammaproteobacteria	o__Burkholderiales	f__Burkholderiaceae	g__Castellaniella	s__Castellaniella sp002421865	1	1	0	0	0	0	0	0	2
RS_GCF_001676725.1	d__Bacteria	p__Proteobacteria	c__Gammaproteobacteria	o__Burkholderiales	f__Burkholderiaceae	g__Bordetella_C	s__Bordetella_C flabilis	1	1	0	0	0	0	0	0	2
RS_GCF_003003055.1	d__Bacteria	p__Proteobacteria	c__Gammaproteobacteria	o__Burkholderiales	f__Burkholderiaceae	g__SCGC-AAA027-K21	s__SCGC-AAA027-K21 sp003003055	1	1	0	0	0	0	0	0	2
GB_GCA_002083615.1	d__Bacteria	p__Proteobacteria	c__Gammaproteobacteria	o__Methylococcales	f__Methylomonadaceae	g__Methylomonas	s__Methylomonas sp002083615	1	1	0	0	0	0	0	0	2
RS_GCF_002005365.1	d__Bacteria	p__Proteobacteria	c__Gammaproteobacteria	o__Burkholderiales	f__Burkholderiaceae	g__Paenalcaligenes	s__Paenalcaligenes hominis	1	1	0	0	0	0	0	0	2
RS_GCF_000657795.2	d__Bacteria	p__Proteobacteria	c__Gammaproteobacteria	o__Burkholderiales	f__Burkholderiaceae	g__Bordetella	s__Bordetella pseudohinzii	1	1	0	0	0	0	0	0	2
RS_GCF_001644045.1	d__Bacteria	p__Proteobacteria	c__Gammaproteobacteria	o__Methylococcales	f__Methylomonadaceae	g__Methylomonas	s__Methylomonas methanica	1	1	0	0	0	0	0	0	2
RS_GCF_002261355.1	d__Bacteria	p__Proteobacteria	c__Gammaproteobacteria	o__Burkholderiales	f__Burkholderiaceae	g__Bordetella	s__Bordetella sp002261355	1	1	0	0	0	0	0	0	2
RS_GCF_002966795.1	d__Bacteria	p__Proteobacteria	c__Gammaproteobacteria	o__Burkholderiales	f__Burkholderiaceae	g__Achromobacter	s__Achromobacter spanius_D	1	1	0	0	0	0	0	0	2
RS_GCF_000209655.1	d__Bacteria	p__Proteobacteria	c__Gammaproteobacteria	o__Burkholderiales	f__Burkholderiaceae	g__Candidimonas	s__Candidimonas sp000209655	1	1	0	0	0	0	0	0	2
RS_GCF_900129885.1	d__Bacteria	p__Proteobacteria	c__Gammaproteobacteria	o__Burkholderiales	f__Burkholderiaceae	g__Candidimonas	s__Candidimonas bauzanensis	1	1	0	0	0	0	0	0	2
GB_GCA_003521065.1	d__Bacteria	p__Proteobacteria	c__Gammaproteobacteria	o__Burkholderiales	f__Burkholderiaceae	g__Alcaligenes	s__Alcaligenes sp003521065	1	1	0	0	0	0	0	0	2
GB_GCA_002737415.1	d__Bacteria	p__Proteobacteria	c__Gammaproteobacteria	o__Burkholderiales	f__Burkholderiaceae	g__SCGC-AAA027-K21	s__SCGC-AAA027-K21 sp002737415	1	1	0	0	0	0	0	0	2
RS_GCF_900089455.2	d__Bacteria	p__Proteobacteria	c__Gammaproteobacteria	o__Burkholderiales	f__Burkholderiaceae	g__Orrella	s__Orrella dioscoreae	1	1	0	0	0	0	0	0	2
RS_GCF_001516865.1	d__Bacteria	p__Proteobacteria	c__Gammaproteobacteria	o__Burkholderiales	f__Burkholderiaceae	g__Alcaligenes	s__Alcaligenes faecalis_C	1	1	0	0	0	0	0	0	2
GB_GCA_002741985.1	d__Bacteria	p__Proteobacteria	c__Gammaproteobacteria	o__Enterobacterales	f__Vibrionaceae	g__Vibrio	s__Vibrio rotiferianus	1	1	0	0	0	0	0	0	2
RS_GCF_000612485.1	d__Bacteria	p__Proteobacteria	c__Gammaproteobacteria	o__Burkholderiales	f__Burkholderiaceae	g__Bordetella	s__Bordetella holmesii	1	1	0	0	0	0	0	0	2
RS_GCF_000429385.1	d__Bacteria	p__Proteobacteria	c__Gammaproteobacteria	o__Burkholderiales	f__Burkholderiaceae	g__Alcaligenes	s__Alcaligenes phenolicus	1	1	0	0	0	0	0	0	2
GB_GCA_002256145.1	d__Bacteria	p__Proteobacteria	c__Gammaproteobacteria	o__Burkholderiales	f__Burkholderiaceae	g__Limnohabitans	s__Limnohabitans sp002256145	1	1	0	0	0	0	0	0	2
GB_GCA_003096595.1	d__Bacteria	p__Proteobacteria	c__Gammaproteobacteria	o__Burkholderiales	f__Burkholderiaceae	g__Pusillimonas	s__Pusillimonas noertemannii	1	1	0	0	0	0	0	0	2
RS_GCF_900078705.1	d__Bacteria	p__Proteobacteria	c__Gammaproteobacteria	o__Burkholderiales	f__Burkholderiaceae	g__Bordetella_B	s__Bordetella_B ansorpii_A	1	1	0	0	0	0	0	0	2
RS_GCF_002849615.1	d__Bacteria	p__Proteobacteria	c__Gammaproteobacteria	o__Burkholderiales	f__Burkholderiaceae	g__Candidimonas	s__Candidimonas sp002849615	1	1	0	0	0	0	0	0	2
RS_GCF_001548475.1	d__Bacteria	p__Proteobacteria	c__Gammaproteobacteria	o__Burkholderiales	f__Burkholderiaceae	g__Bordetella	s__Bordetella hinzii	1	1	0	0	0	0	0	0	2
RS_GCF_000515215.1	d__Bacteria	p__Proteobacteria	c__Gammaproteobacteria	o__Methylococcales	f__Methylomonadaceae	g__Methylomonas	s__Methylomonas sp000515215	1	1	0	0	0	0	0	0	2
RS_GCF_002849655.1	d__Bacteria	p__Proteobacteria	c__Gammaproteobacteria	o__Burkholderiales	f__Burkholderiaceae	g__Candidimonas	s__Candidimonas sp002849655	1	1	0	0	0	0	0	0	2
RS_GCF_900078315.1	d__Bacteria	p__Proteobacteria	c__Gammaproteobacteria	o__Burkholderiales	f__Burkholderiaceae	g__Bordetella_B	s__Bordetella_B ansorpii_B	1	1	0	0	0	0	0	0	2
RS_GCF_001644035.1	d__Bacteria	p__Proteobacteria	c__Gammaproteobacteria	o__Methylococcales	f__Methylomonadaceae	g__Methylomonas	s__Methylomonas methanica_A	1	1	0	0	0	0	0	0	2
RS_GCF_002443155.1	d__Bacteria	p__Proteobacteria	c__Gammaproteobacteria	o__Burkholderiales	f__Burkholderiaceae	g__Alcaligenes	s__Alcaligenes faecalis	1	1	0	0	0	0	0	0	2
GB_GCA_001525555.2	d__Bacteria	p__Proteobacteria	c__Gammaproteobacteria	o__Burkholderiales	f__Burkholderiaceae	g__Bordetella	s__Bordetella pertussis	1	1	0	0	0	0	0	0	2
RS_GCF_001048535.1	d__Bacteria	p__Proteobacteria	c__Gammaproteobacteria	o__Enterobacterales	f__Vibrionaceae	g__Vibrio	s__Vibrio crassostreae	1	1	0	0	0	0	0	0	2
RS_GCF_002236805.1	d__Bacteria	p__Proteobacteria	c__Gammaproteobacteria	o__Burkholderiales	f__Burkholderiaceae	g__Pusillimonas	s__Pusillimonas sp002236805	1	1	0	0	0	0	0	0	2
RS_GCF_002209565.1	d__Bacteria	p__Proteobacteria	c__Gammaproteobacteria	o__Burkholderiales	f__Burkholderiaceae	g__Candidimonas	s__Candidimonas nitroreducens	1	1	0	0	0	0	0	0	2
RS_GCF_000018285.1	d__Bacteria	p__Proteobacteria	c__Gammaproteobacteria	o__Enterobacterales	f__Shewanellaceae	g__Shewanella	s__Shewanella pealeana	1	1	0	0	0	0	0	0	2
RS_GCF_002261185.1	d__Bacteria	p__Proteobacteria	c__Gammaproteobacteria	o__Burkholderiales	f__Burkholderiaceae	g__Bordetella_A	s__Bordetella_A sp002261185	1	1	0	0	0	0	0	0	2
RS_GCF_000702925.1	d__Bacteria	p__Proteobacteria	c__Gammaproteobacteria	o__Methylococcales	f__Methylomonadaceae	g__Methylomonas	s__Methylomonas sp000702925	1	1	0	0	0	0	0	0	2
RS_GCF_002261475.1	d__Bacteria	p__Proteobacteria	c__Gammaproteobacteria	o__Burkholderiales	f__Burkholderiaceae	g__Bordetella	s__Bordetella sp002261475	1	1	0	0	0	0	0	0	2
RS_GCF_900156745.1	d__Bacteria	p__Proteobacteria	c__Gammaproteobacteria	o__Burkholderiales	f__Burkholderiaceae	g__Achromobacter	s__Achromobacter sp900156745	1	1	0	0	0	0	0	0	2
RS_GCF_003076515.1	d__Bacteria	p__Proteobacteria	c__Gammaproteobacteria	o__Burkholderiales	f__Burkholderiaceae	g__Alcaligenes	s__Alcaligenes aquatilis	1	1	0	0	0	0	0	0	2
GB_GCA_002441445.1	d__Bacteria	p__Proteobacteria	c__Gammaproteobacteria	o__Burkholderiales	f__Burkholderiaceae	g__Candidimonas	s__Candidimonas sp002441445	0	1	0	0	0	0	0	0	1
RS_GCF_002116905.1	d__Bacteria	p__Proteobacteria	c__Gammaproteobacteria	o__Burkholderiales	f__Burkholderiaceae	g__Rhizobacter	s__Rhizobacter gummiphilus	0	1	0	0	0	0	0	0	1
GB_GCA_003523945.1	d__Bacteria	p__Nitrospirota	c__Nitrospiria	o__Nitrospirales	f__UBA8639	g__UBA8639	s__UBA8639 sp003523945	0	0	1	0	0	0	0	6	7
RS_GCF_900129675.1	d__Bacteria	p__Proteobacteria	c__Alphaproteobacteria	o__Rhizobiales	f__Xanthobacteraceae	g__Bradyrhizobium	s__Bradyrhizobium erythrophlei_A	7	0	0	0	0	0	0	0	7
RS_GCF_001458775.1	d__Bacteria	p__Nitrospirota	c__Nitrospiria	o__Nitrospirales	f__Nitrospiraceae	g__Nitrospira	s__Nitrospira nitrificans	0	0	1	0	0	0	0	6	7
GB_GCA_002083365.1	d__Bacteria	p__Nitrospirota	c__Nitrospiria	o__Nitrospirales	f__Nitrospiraceae	g__Nitrospira	s__Nitrospira sp002083365	0	0	1	0	0	0	0	6	7
RS_GCF_002027145.1	d__Bacteria	p__Actinobacteriota	c__Actinobacteria	o__Streptosporangiales	f__Streptosporangiaceae	g__Microbispora	s__Microbispora sp002027145	5	0	1	0	0	0	0	0	6
RS_GCF_000227215.1	d__Bacteria	p__Proteobacteria	c__Gammaproteobacteria	o__Acidithiobacillales	f__Acidithiobacillaceae	g__Acidithiobacillus	s__Acidithiobacillus thiooxidans	6	0	0	0	0	0	0	0	6
RS_GCF_001854325.1	d__Bacteria	p__Proteobacteria	c__Gammaproteobacteria	o__Burkholderiales	f__Burkholderiaceae	g__Cupriavidus	s__Cupriavidus sp001854325	6	0	0	0	0	0	0	0	6
RS_GCF_001528665.1	d__Bacteria	p__Actinobacteriota	c__Actinobacteria	o__Streptosporangiales	f__Streptosporangiaceae	g__Microtetraspora	s__Microtetraspora malaysiensis	5	0	1	0	0	0	0	0	6
RS_GCF_900078535.2	d__Bacteria	p__Nitrospirota	c__Nitrospiria	o__Nitrospirales	f__Nitrospiraceae	g__Nitrospira	s__Nitrospira sp900078535	2	0	0	0	0	0	0	4	6
RS_GCF_000024865.1	d__Bacteria	p__Actinobacteriota	c__Actinobacteria	o__Streptosporangiales	f__Streptosporangiaceae	g__Streptosporangium	s__Streptosporangium roseum	5	0	1	0	0	0	0	0	6
RS_GCF_001544555.2	d__Bacteria	p__Proteobacteria	c__Gammaproteobacteria	o__Burkholderiales	f__Burkholderiaceae	g__Caballeronia	s__Caballeronia udeis	6	0	0	0	0	0	0	0	6
GB_GCA_001464735.1	d__Bacteria	p__Nitrospirota	c__Nitrospiria	o__Nitrospirales	f__Nitrospiraceae	g__Nitrospira	s__Nitrospira sp001464735	1	0	1	0	0	0	0	4	6
RS_GCF_001273775.1	d__Bacteria	p__Nitrospirota	c__Nitrospiria	o__Nitrospirales	f__Nitrospiraceae	g__Nitrospira	s__Nitrospira moscoviensis	0	0	2	0	0	0	0	4	6
RS_GCF_900170025.1	d__Bacteria	p__Nitrospirota	c__Nitrospiria	o__Nitrospirales	f__Nitrospiraceae	g__Nitrospira_A	s__Nitrospira_A sp900170025	1	0	1	0	0	0	0	4	6
RS_GCF_900109355.1	d__Bacteria	p__Actinobacteriota	c__Actinobacteria	o__Streptosporangiales	f__Streptosporangiaceae	g__Nonomuraea	s__Nonomuraea pusilla	5	0	1	0	0	0	0	0	6
RS_GCF_003001935.1	d__Bacteria	p__Actinobacteriota	c__Actinobacteria	o__Streptosporangiales	f__Streptosporangiaceae	g__Nonomuraea	s__Nonomuraea fuscirosea	5	0	1	0	0	0	0	0	6
RS_GCF_000175575.2	d__Bacteria	p__Proteobacteria	c__Gammaproteobacteria	o__Acidithiobacillales	f__Acidithiobacillaceae	g__Acidithiobacillus	s__Acidithiobacillus caldus	6	0	0	0	0	0	0	0	6
RS_GCF_001634365.1	d__Bacteria	p__Proteobacteria	c__Gammaproteobacteria	o__Burkholderiales	f__Burkholderiaceae	g__Paraburkholderia	s__Paraburkholderia sp001634365	6	0	0	0	0	0	0	0	6
RS_GCF_000724975.1	d__Bacteria	p__Proteobacteria	c__Gammaproteobacteria	o__Burkholderiales	f__Burkholderiaceae	g__Burkholderia	s__Burkholderia cepacia_E	4	0	0	0	0	0	1	0	5
GB_GCA_001914955.1	d__Bacteria	p__Nitrospirota	c__Nitrospiria	o__Nitrospirales	f__Nitrospiraceae	g__40CM-3-62-11	s__40CM-3-62-11 sp001914955	1	0	0	0	0	0	0	4	5
GB_GCA_003135435.1	d__Bacteria	p__Nitrospirota	c__Nitrospiria	o__Nitrospirales	f__Nitrospiraceae	g__Palsa-1315	s__Palsa-1315 sp003135435	0	0	1	0	0	0	0	4	5
GB_GCA_002420105.1	d__Bacteria	p__Nitrospirota	c__Nitrospiria	o__Nitrospirales	f__Nitrospiraceae	g__Nitrospira_C	s__Nitrospira_C sp002420105	0	0	0	0	0	0	0	5	5
RS_GCF_002149035.1	d__Bacteria	p__Actinobacteriota	c__Actinobacteria	o__Streptosporangiales	f__Streptosporangiaceae	g__Streptosporangium	s__Streptosporangium minutum	4	0	1	0	0	0	0	0	5
RS_GCF_000959445.1	d__Bacteria	p__Proteobacteria	c__Gammaproteobacteria	o__Burkholderiales	f__Burkholderiaceae	g__Burkholderia	s__Burkholderia vietnamiensis	5	0	0	0	0	0	0	0	5
RS_GCF_900156315.1	d__Bacteria	p__Actinobacteriota	c__Actinobacteria	o__Streptosporangiales	f__Streptosporangiaceae	g__Microbispora	s__Microbispora rosea	4	0	1	0	0	0	0	0	5
GB_GCA_001723765.1	d__Bacteria	p__Planctomycetota	c__Brocadiae	o__Brocadiales	f__Scalinduaceae	g__Scalindua	s__Scalindua rubra_A	0	0	0	0	0	0	0	5	5
GB_GCA_001567445.1	d__Bacteria	p__Nitrospirota	c__Nitrospiria	o__Nitrospirales	f__Nitrospiraceae	g__Nitrospira_A	s__Nitrospira_A sp001567445	1	0	0	0	0	0	0	4	5
RS_GCF_000020125.1	d__Bacteria	p__Proteobacteria	c__Gammaproteobacteria	o__Burkholderiales	f__Burkholderiaceae	g__Paraburkholderia	s__Paraburkholderia phytofirmans	5	0	0	0	0	0	0	0	5
RS_GCF_000685035.1	d__Bacteria	p__Proteobacteria	c__Gammaproteobacteria	o__Burkholderiales	f__Burkholderiaceae	g__Paraburkholderia_B	s__Paraburkholderia_B ferrariae	4	0	0	0	0	0	1	0	5
RS_GCF_001552235.1	d__Bacteria	p__Actinobacteriota	c__Actinobacteria	o__Streptosporangiales	f__Streptosporangiaceae	g__Actinomadura_B	s__Actinomadura_B rubrobrunea	3	0	2	0	0	0	0	0	5
RS_GCF_000196815.1	d__Bacteria	p__Nitrospirota	c__Nitrospiria	o__Nitrospirales	f__Nitrospiraceae	g__Nitrospira_A	s__Nitrospira_A defluvii	1	0	0	0	0	0	0	4	5
RS_GCF_001975725.1	d__Bacteria	p__Proteobacteria	c__Gammaproteobacteria	o__Ectothiorhodospirales	f__Acidihalobacteraceae	g__Acidihalobacter_A	s__Acidihalobacter_A ferrooxidans	5	0	0	0	0	0	0	0	5
RS_GCF_001458695.1	d__Bacteria	p__Nitrospirota	c__Nitrospiria	o__Nitrospirales	f__Nitrospiraceae	g__Nitrospira	s__Nitrospira inopinata	1	0	0	0	0	0	0	4	5
RS_GCF_900169565.1	d__Bacteria	p__Nitrospirota	c__Nitrospiria	o__Nitrospirales	f__Nitrospiraceae	g__Nitrospira_C	s__Nitrospira_C japonica	0	0	1	0	0	0	0	4	5
GB_GCA_002869845.1	d__Bacteria	p__Nitrospirota	c__Nitrospiria	o__Nitrospirales	f__Nitrospiraceae	g__Nitrospira	s__Nitrospira sp002869845	1	0	0	0	0	0	0	4	5
RS_GCF_000379885.1	d__Bacteria	p__Actinobacteriota	c__Actinobacteria	o__Streptosporangiales	f__Streptosporangiaceae	g__Nonomuraea	s__Nonomuraea coxensis	5	0	0	0	0	0	0	0	5
RS_GCF_900113865.1	d__Bacteria	p__Actinobacteriota	c__Actinobacteria	o__Streptosporangiales	f__Streptosporangiaceae	g__Streptosporangium	s__Streptosporangium canum	4	0	1	0	0	0	0	0	5
RS_GCF_002902945.1	d__Bacteria	p__Proteobacteria	c__Gammaproteobacteria	o__Burkholderiales	f__Burkholderiaceae	g__Paraburkholderia_A	s__Paraburkholderia_A caribensis	5	0	0	0	0	0	0	0	5
RS_GCF_000280495.2	d__Bacteria	p__Proteobacteria	c__Gammaproteobacteria	o__Enterobacterales	f__Enterobacteriaceae	g__Kosakonia	s__Kosakonia radicincitans	5	0	0	0	0	0	0	0	5
RS_GCF_001570385.1	d__Bacteria	p__Actinobacteriota	c__Actinobacteria	o__Streptosporangiales	f__Streptosporangiaceae	g__Microtetraspora	s__Microtetraspora glauca	4	0	1	0	0	0	0	0	5
RS_GCF_000014185.1	d__Bacteria	p__Actinobacteriota	c__Rubrobacteria	o__Rubrobacterales	f__Rubrobacteraceae	g__Rubrobacter_B	s__Rubrobacter_B xylanophilus	0	0	0	0	0	0	0	5	5
GB_GCA_002420115.1	d__Bacteria	p__Nitrospirota	c__Nitrospiria	o__Nitrospirales	f__Nitrospiraceae	g__Nitrospira	s__Nitrospira sp002420115	1	0	0	0	0	0	0	4	5
RS_GCF_000178415.2	d__Bacteria	p__Proteobacteria	c__Gammaproteobacteria	o__Burkholderiales	f__Burkholderiaceae	g__Paraburkholderia	s__Paraburkholderia sp000178415	5	0	0	0	0	0	0	0	5
RS_GCF_001570365.1	d__Bacteria	p__Actinobacteriota	c__Actinobacteria	o__Streptosporangiales	f__Streptosporangiaceae	g__Microtetraspora	s__Microtetraspora fusca	4	0	1	0	0	0	0	0	5
GB_GCA_002083555.1	d__Bacteria	p__Nitrospirota	c__Nitrospiria	o__Nitrospirales	f__Nitrospiraceae	g__Nitrospira_D	s__Nitrospira_D sp002083555	0	0	1	0	0	0	0	4	5
GB_GCA_002254365.1	d__Bacteria	p__Nitrospirota	c__Nitrospiria	o__Nitrospirales	f__Nitrospiraceae	g__Nitrospira	s__Nitrospira sp002254365	0	0	0	0	0	0	0	5	5
RS_GCF_900129505.1	d__Bacteria	p__Proteobacteria	c__Alphaproteobacteria	o__Rhizobiales	f__Xanthobacteraceae	g__Bradyrhizobium	s__Bradyrhizobium erythrophlei_D	5	0	0	0	0	0	0	0	5
RS_GCF_001247655.1	d__Bacteria	p__Proteobacteria	c__Gammaproteobacteria	o__Enterobacterales	f__Gallaecimonadaceae	g__Gallaecimonas	s__Gallaecimonas pentaromativorans	5	0	0	0	0	0	0	0	5
RS_GCF_000006805.1	d__Archaea	p__Halobacterota	c__Halobacteria	o__Halobacteriales	f__Halobacteriaceae	g__Halobacterium	s__Halobacterium salinarum	4	0	0	0	0	0	0	0	4
RS_GCF_000148385.1	d__Archaea	p__Crenarchaeota	c__Thermoprotei	o__Thermoproteales	f__Thermocladiaceae	g__Vulcanisaeta	s__Vulcanisaeta distributa	0	0	0	0	2	2	0	0	4
GB_GCA_001189275.1	d__Archaea	p__Crenarchaeota	c__Thermoprotei	o__Thermoproteales	f__Thermoproteaceae	g__Pyrobaculum	s__Pyrobaculum sp001189275	0	0	0	0	2	2	0	0	4
RS_GCF_000190315.1	d__Archaea	p__Crenarchaeota	c__Thermoprotei	o__Thermoproteales	f__Thermocladiaceae	g__Vulcanisaeta	s__Vulcanisaeta moutnovskia	0	0	0	0	2	2	0	0	4
GB_GCA_001316025.1	d__Archaea	p__Crenarchaeota	c__Thermoprotei	o__Thermoproteales	f__Thermocladiaceae	g__Vulcanisaeta	s__Vulcanisaeta souniana	0	0	0	0	2	2	0	0	4
RS_GCF_000193375.1	d__Archaea	p__Crenarchaeota	c__Thermoprotei	o__Thermoproteales	f__Thermoproteaceae	g__Thermoproteus	s__Thermoproteus uzoniensis	0	0	0	0	2	2	0	0	4
GB_GCA_003298465.1	d__Archaea	p__Halobacterota	c__Halobacteria	o__Halobacteriales	f__Haloadaptaceae	g__H22	s__H22 sp003298465	4	0	0	0	0	0	0	0	4
GB_GCA_001516765.1	d__Archaea	p__Crenarchaeota	c__Thermoprotei	o__Thermoproteales	f__Thermocladiaceae	g__Vulcanisaeta	s__Vulcanisaeta sp001516765	0	0	0	0	2	2	0	0	4
GB_GCA_002497345.1	d__Archaea	p__Crenarchaeota	c__Thermoprotei	o__Thermoproteales	f__Thermoproteaceae	g__Thermoproteus	s__Thermoproteus sp002497345	0	0	0	0	2	2	0	0	4
RS_GCF_002077075.2	d__Archaea	p__Crenarchaeota	c__Thermoprotei	o__Thermoproteales	f__Thermoproteaceae	g__Thermoproteus	s__Thermoproteus sp002077075	0	0	0	0	2	2	0	0	4
RS_GCF_001748385.1	d__Archaea	p__Crenarchaeota	c__Thermoprotei	o__Thermoproteales	f__Thermocladiaceae	g__Vulcanisaeta_B	s__Vulcanisaeta_B thermophila	0	0	0	0	2	2	0	0	4
GB_GCA_002508315.1	d__Archaea	p__Crenarchaeota	c__Thermoprotei	o__Thermoproteales	f__Thermocladiaceae	g__Thermocladium	s__Thermocladium sp002508315	0	0	0	0	2	2	0	0	4
RS_GCF_000745015.1	d__Bacteria	p__Proteobacteria	c__Gammaproteobacteria	o__Burkholderiales	f__Burkholderiaceae	g__Paraburkholderia	s__Paraburkholderia sp000745015	4	0	0	0	0	0	0	0	4
RS_GCF_000426785.1	d__Bacteria	p__Proteobacteria	c__Alphaproteobacteria	o__Rhizobiales	f__Xanthobacteraceae	g__Bradyrhizobium	s__Bradyrhizobium sp000426785	4	0	0	0	0	0	0	0	4
RS_GCF_000253115.1	d__Bacteria	p__Proteobacteria	c__Gammaproteobacteria	o__Burkholderiales	f__Burkholderiaceae	g__Thiomonas	s__Thiomonas arsenitoxydans	2	0	0	0	0	0	2	0	4
RS_GCF_900141985.1	d__Bacteria	p__Actinobacteriota	c__Actinobacteria	o__Streptosporangiales	f__Streptosporangiaceae	g__Nocardiopsis	s__Nocardiopsis flavescens	4	0	0	0	0	0	0	0	4
RS_GCF_001399675.1	d__Bacteria	p__Firmicutes_K	c__Alicyclobacillia	o__Alicyclobacillales	f__Alicyclobacillaceae	g__Alicyclobacillus_B	s__Alicyclobacillus_B ferrooxydans	2	0	0	2	0	0	0	0	4
RS_GCF_000252995.1	d__Bacteria	p__Proteobacteria	c__Gammaproteobacteria	o__Enterobacterales	f__Enterobacteriaceae	g__Salmonella	s__Salmonella bongori	4	0	0	0	0	0	0	0	4
RS_GCF_900234795.1	d__Bacteria	p__Proteobacteria	c__Alphaproteobacteria	o__Rhizobiales	f__Beijerinckiaceae	g__Methylobacterium	s__Methylobacterium extorquens	4	0	0	0	0	0	0	0	4
RS_GCF_000179555.1	d__Bacteria	p__Desulfobacterota_A	c__Desulfovibrionia	o__Desulfovibrionales	f__Desulfovibrionaceae	g__Desulfovibrio_F	s__Desulfovibrio_F fructosivorans	2	0	0	0	0	0	2	0	4
RS_GCF_002858715.1	d__Bacteria	p__Proteobacteria	c__Gammaproteobacteria	o__Enterobacterales	f__Enterobacteriaceae	g__Nissabacter	s__Nissabacter sp002858715	4	0	0	0	0	0	0	0	4
RS_GCF_000813585.1	d__Bacteria	p__Proteobacteria	c__Gammaproteobacteria	o__Enterobacterales	f__Enterobacteriaceae	g__Leclercia	s__Leclercia adecarboxylata_A	4	0	0	0	0	0	0	0	4
GB_GCA_002238765.1	d__Bacteria	p__Nitrospirota	c__Nitrospiria	o__Nitrospirales	f__UBA8639	g__Bin75	s__Bin75 sp002238765	0	0	0	0	0	0	0	4	4
RS_GCF_001874525.1	d__Bacteria	p__Desulfobacterota_A	c__Desulfovibrionia	o__Desulfovibrionales	f__Desulfovibrionaceae	g__Pseudodesulfovibrio	s__Pseudodesulfovibrio dechloracetivorans	2	0	0	0	0	0	2	0	4
RS_GCF_900106035.1	d__Bacteria	p__Actinobacteriota	c__Actinobacteria	o__Jiangellales	f__Jiangellaceae	g__Jiangella	s__Jiangella alba	3	0	1	0	0	0	0	0	4
RS_GCF_000721075.1	d__Bacteria	p__Actinobacteriota	c__Actinobacteria	o__Streptosporangiales	f__Streptosporangiaceae	g__Streptosporangium	s__Streptosporangium amethystogenes	4	0	0	0	0	0	0	0	4
RS_GCF_900112785.1	d__Bacteria	p__Proteobacteria	c__Gammaproteobacteria	o__Enterobacterales	f__Enterobacteriaceae	g__Metakosakonia	s__Metakosakonia sp900112785	4	0	0	0	0	0	0	0	4
RS_GCF_000987075.1	d__Bacteria	p__Proteobacteria	c__Gammaproteobacteria	o__Burkholderiales	f__Burkholderiaceae	g__Burkholderia	s__Burkholderia contaminans	4	0	0	0	0	0	0	0	4
RS_GCF_002563755.1	d__Bacteria	p__Proteobacteria	c__Gammaproteobacteria	o__Burkholderiales	f__Burkholderiaceae	g__Burkholderia	s__Burkholderia sp002563755	4	0	0	0	0	0	0	0	4
RS_GCF_900148505.1	d__Bacteria	p__Proteobacteria	c__Alphaproteobacteria	o__Rhizobiales	f__Amorphaceae	g__Pseudoxanthobacter	s__Pseudoxanthobacter soli	4	0	0	0	0	0	0	0	4
GB_GCA_002729195.1	d__Bacteria	p__Proteobacteria	c__Gammaproteobacteria	o__UBA10353	f__LS-SOB	g__UBA12578	s__UBA12578 sp002729195	0	0	0	0	0	0	0	4	4
RS_GCF_001718315.1	d__Bacteria	p__Proteobacteria	c__Gammaproteobacteria	o__Burkholderiales	f__Burkholderiaceae	g__Burkholderia	s__Burkholderia diffusa	4	0	0	0	0	0	0	0	4
RS_GCF_000612225.1	d__Bacteria	p__Firmicutes_I	c__Bacilli_A	o__Paenibacillales	f__Paenibacillaceae	g__Paenibacillus_G	s__Paenibacillus_G ehimensis	1	0	0	2	0	0	1	0	4
GB_GCA_002451055.1	d__Bacteria	p__Nitrospirota	c__Nitrospiria	o__Nitrospirales	f__Nitrospiraceae	g__Nitrospira	s__Nitrospira sp002451055	0	0	0	0	0	0	0	4	4
RS_GCF_900177375.1	d__Bacteria	p__Desulfobacterota_A	c__Desulfovibrionia	o__Desulfovibrionales	f__Desulfovibrionaceae	g__Desulfovibrio_H	s__Desulfovibrio_H sp900177375	2	0	0	0	0	0	2	0	4
RS_GCF_001269555.1	d__Bacteria	p__Proteobacteria	c__Gammaproteobacteria	o__Pseudomonadales	f__Pseudomonadaceae	g__Pseudomonas_E	s__Pseudomonas_E piscium	4	0	0	0	0	0	0	0	4
RS_GCF_003202035.1	d__Bacteria	p__Proteobacteria	c__Gammaproteobacteria	o__Burkholderiales	f__Chromobacteriaceae	g__Aquitalea	s__Aquitalea magnusonii	4	0	0	0	0	0	0	0	4
GB_GCA_002331625.1	d__Bacteria	p__Nitrospirota	c__Nitrospiria	o__Nitrospirales	f__Nitrospiraceae	g__Nitrospira	s__Nitrospira sp002331625	0	0	0	0	0	0	0	4	4
RS_GCF_001856865.2	d__Bacteria	p__Proteobacteria	c__Gammaproteobacteria	o__Enterobacterales	f__Enterobacteriaceae	g__Metakosakonia	s__Metakosakonia intestini	4	0	0	0	0	0	0	0	4
RS_GCF_001029505.1	d__Bacteria	p__Actinobacteriota	c__Rubrobacteria	o__Rubrobacterales	f__Rubrobacteraceae	g__Rubrobacter_A	s__Rubrobacter_A aplysinae	1	0	1	0	0	0	0	2	4
GB_GCA_900403705.1	d__Bacteria	p__Nitrospirota	c__Nitrospiria	o__Nitrospirales	f__Nitrospiraceae	g__Nitrospira_D	s__Nitrospira_D lenta	0	0	0	0	0	0	0	4	4
RS_GCF_001418255.1	d__Bacteria	p__Proteobacteria	c__Gammaproteobacteria	o__Burkholderiales	f__Burkholderiaceae	g__Thiomonas	s__Thiomonas bhubaneswarensis	2	0	0	0	0	0	2	0	4
RS_GCF_001458735.1	d__Bacteria	p__Nitrospirota	c__Nitrospiria	o__Nitrospirales	f__Nitrospiraceae	g__Nitrospira	s__Nitrospira nitrosa	0	0	0	0	0	0	0	4	4
RS_GCF_000092885.1	d__Bacteria	p__Proteobacteria	c__Gammaproteobacteria	o__Burkholderiales	f__Burkholderiaceae	g__Paraburkholderia	s__Paraburkholderia sp000092885	4	0	0	0	0	0	0	0	4
RS_GCF_000504285.1	d__Bacteria	p__Actinobacteriota	c__Actinobacteria	o__Streptomycetales	f__Catenulisporaceae	g__Actinospica	s__Actinospica robiniae	1	0	3	0	0	0	0	0	4
RS_GCF_000354175.2	d__Bacteria	p__Proteobacteria	c__Gammaproteobacteria	o__Enterobacterales	f__Vibrionaceae	g__Vibrio	s__Vibrio alginolyticus	4	0	0	0	0	0	0	0	4
RS_GCF_001270745.1	d__Bacteria	p__Actinobacteriota	c__Actinobacteria	o__Jiangellales	f__Jiangellaceae	g__Jiangella	s__Jiangella muralis	3	0	1	0	0	0	0	0	4
RS_GCF_003236385.1	d__Bacteria	p__Actinobacteriota	c__Actinobacteria	o__Streptosporangiales	f__Streptosporangiaceae	g__Sphaerisporangium	s__Sphaerisporangium sp003236385	3	0	1	0	0	0	0	0	4
RS_GCF_002573715.1	d__Bacteria	p__Firmicutes_I	c__Bacilli_A	o__Paenibacillales	f__Paenibacillaceae	g__Paenibacillus	s__Paenibacillus sp002573715	1	0	0	3	0	0	0	0	4
RS_GCF_001570545.1	d__Bacteria	p__Actinobacteriota	c__Actinobacteria	o__Streptosporangiales	f__Streptosporangiaceae	g__Herbidospora	s__Herbidospora mongoliensis	4	0	0	0	0	0	0	0	4
GB_GCA_002869925.1	d__Bacteria	p__Nitrospirota	c__Nitrospiria	o__Nitrospirales	f__Nitrospiraceae	g__Palsa-1315	s__Palsa-1315 sp002869925	0	0	0	0	0	0	0	4	4
RS_GCF_000685015.1	d__Bacteria	p__Proteobacteria	c__Gammaproteobacteria	o__Burkholderiales	f__Burkholderiaceae	g__Paraburkholderia_B	s__Paraburkholderia_B bannensis	4	0	0	0	0	0	0	0	4
RS_GCF_000189275.1	d__Bacteria	p__Proteobacteria	c__Gammaproteobacteria	o__Enterobacterales	f__Vibrionaceae	g__Vibrio	s__Vibrio sinaloensis_B	4	0	0	0	0	0	0	0	4
GB_GCA_002869885.1	d__Bacteria	p__Nitrospirota	c__Nitrospiria	o__Nitrospirales	f__Nitrospiraceae	g__Palsa-1315	s__Palsa-1315 sp002869885	0	0	0	0	0	0	0	4	4
RS_GCF_900112375.1	d__Bacteria	p__Proteobacteria	c__Gammaproteobacteria	o__Pseudomonadales	f__Pseudomonadaceae	g__Pseudomonas	s__Pseudomonas citronellolis	4	0	0	0	0	0	0	0	4
RS_GCF_001545075.1	d__Bacteria	p__Proteobacteria	c__Gammaproteobacteria	o__Burkholderiales	f__Burkholderiaceae	g__Caballeronia	s__Caballeronia ptereochthonis	4	0	0	0	0	0	0	0	4
RS_GCF_002850745.1	d__Bacteria	p__Actinobacteriota	c__Actinobacteria	o__Streptosporangiales	f__Streptosporangiaceae	g__Nonomuraea	s__Nonomuraea indica	4	0	0	0	0	0	0	0	4
RS_GCF_000155975.1	d__Bacteria	p__Proteobacteria	c__Gammaproteobacteria	o__Enterobacterales	f__Enterobacteriaceae	g__Citrobacter	s__Citrobacter portucalensis_A	4	0	0	0	0	0	0	0	4
GB_GCA_003134115.1	d__Bacteria	p__Dormibacterota	c__Dormibacteria	o__UBA8260	f__UBA8260	g__UBA8260	s__UBA8260 sp003134115	2	0	0	0	0	0	0	2	4
RS_GCF_002847505.1	d__Bacteria	p__Proteobacteria	c__Gammaproteobacteria	o__Acidithiobacillales	f__Acidithiobacillaceae	g__Acidithiobacillus	s__Acidithiobacillus sp002847505	4	0	0	0	0	0	0	0	4
RS_GCF_001956045.1	d__Bacteria	p__Firmicutes_I	c__Bacilli_A	o__Paenibacillales	f__Paenibacillaceae	g__Paenibacillus_S	s__Paenibacillus_S sp001956045	1	0	0	2	0	0	1	0	4
RS_GCF_002278075.1	d__Bacteria	p__Proteobacteria	c__Gammaproteobacteria	o__Burkholderiales	f__Burkholderiaceae	g__Paraburkholderia	s__Paraburkholderia aromaticivorans	4	0	0	0	0	0	0	0	4
RS_GCF_900100735.1	d__Bacteria	p__Proteobacteria	c__Gammaproteobacteria	o__Burkholderiales	f__Burkholderiaceae	g__Paraburkholderia	s__Paraburkholderia phenazinium	4	0	0	0	0	0	0	0	4
GB_GCA_001805245.1	d__Bacteria	p__Nitrospirota	c__Nitrospiria	o__Nitrospirales	f__Nitrospiraceae	g__2-02-FULL-62-14	s__2-02-FULL-62-14 sp001805245	0	0	0	0	0	0	0	4	4
RS_GCF_900130115.1	d__Bacteria	p__Proteobacteria	c__Gammaproteobacteria	o__Enterobacterales	f__Enterobacteriaceae	g__Nissabacter	s__Nissabacter archeti	4	0	0	0	0	0	0	0	4
RS_GCF_002154615.1	d__Bacteria	p__Actinobacteriota	c__Actinobacteria	o__Streptomycetales	f__Streptomycetaceae	g__Streptomyces	s__Streptomyces recifensis	3	0	1	0	0	0	0	0	4
RS_GCF_001188485.1	d__Bacteria	p__Proteobacteria	c__Gammaproteobacteria	o__Enterobacterales	f__Enterobacteriaceae	g__Trabulsiella	s__Trabulsiella odontotermitis_A	4	0	0	0	0	0	0	0	4
RS_GCF_900111685.1	d__Bacteria	p__Actinobacteriota	c__Actinobacteria	o__Streptosporangiales	f__Streptosporangiaceae	g__Nonomuraea	s__Nonomuraea wenchangensis	4	0	0	0	0	0	0	0	4
RS_GCF_000241955.1	d__Bacteria	p__Proteobacteria	c__Gammaproteobacteria	o__Enterobacterales	f__Enterobacteriaceae	g__Rahnella	s__Rahnella aquatilis	4	0	0	0	0	0	0	0	4
RS_GCF_001514055.1	d__Bacteria	p__Actinobacteriota	c__Actinobacteria	o__Streptomycetales	f__Streptomycetaceae	g__Streptomyces	s__Streptomyces corchorusii	2	0	2	0	0	0	0	0	4
RS_GCF_002093975.1	d__Bacteria	p__Actinobacteriota	c__Actinobacteria	o__Streptosporangiales	f__Streptosporangiaceae	g__Thermoactinospora	s__Thermoactinospora rubra	4	0	0	0	0	0	0	0	4
RS_GCF_001645125.1	d__Bacteria	p__Proteobacteria	c__Gammaproteobacteria	o__Burkholderiales	f__Burkholderiaceae	g__Paraburkholderia	s__Paraburkholderia ginsengiterrae	4	0	0	0	0	0	0	0	4
RS_GCF_000012945.1	d__Bacteria	p__Proteobacteria	c__Gammaproteobacteria	o__Burkholderiales	f__Burkholderiaceae	g__Burkholderia	s__Burkholderia lata	4	0	0	0	0	0	0	0	4
RS_GCF_003121405.1	d__Bacteria	p__Proteobacteria	c__Gammaproteobacteria	o__Burkholderiales	f__Burkholderiaceae	g__Paraburkholderia_A	s__Paraburkholderia_A sp003121405	4	0	0	0	0	0	0	0	4
RS_GCF_900103875.1	d__Bacteria	p__Proteobacteria	c__Gammaproteobacteria	o__Pseudomonadales	f__Pseudomonadaceae	g__Pseudomonas_E	s__Pseudomonas_E arsenicoxydans	4	0	0	0	0	0	0	0	4
RS_GCF_002355515.1	d__Bacteria	p__Proteobacteria	c__Alphaproteobacteria	o__Rhizobiales	f__Beijerinckiaceae	g__Methylobacterium	s__Methylobacterium populi_A	4	0	0	0	0	0	0	0	4
RS_GCF_000722545.1	d__Bacteria	p__Firmicutes_I	c__Bacilli_A	o__Paenibacillales	f__Paenibacillaceae	g__Paenibacillus_G	s__Paenibacillus_G tyrfis	1	0	0	2	0	0	1	0	4
RS_GCF_000340945.1	d__Bacteria	p__Actinobacteriota	c__Actinobacteria	o__Streptosporangiales	f__Streptosporangiaceae	g__Nocardiopsis	s__Nocardiopsis synnemataformans	4	0	0	0	0	0	0	0	4
GB_GCA_001319865.1	d__Bacteria	p__Proteobacteria	c__Gammaproteobacteria	o__Burkholderiales	f__Burkholderiaceae	g__Paraburkholderia_A	s__Paraburkholderia_A sp001319865	4	0	0	0	0	0	0	0	4
RS_GCF_000013645.1	d__Bacteria	p__Proteobacteria	c__Gammaproteobacteria	o__Burkholderiales	f__Burkholderiaceae	g__Paraburkholderia	s__Paraburkholderia xenovorans	4	0	0	0	0	0	0	0	4
GB_GCA_002869895.1	d__Bacteria	p__Nitrospirota	c__Nitrospiria	o__Nitrospirales	f__Nitrospiraceae	g__Palsa-1315	s__Palsa-1315 sp002869895	0	0	0	0	0	0	0	4	4
RS_GCF_001552635.1	d__Bacteria	p__Actinobacteriota	c__Actinobacteria	o__Streptosporangiales	f__Streptosporangiaceae	g__Spirillospora	s__Spirillospora hibisca	2	0	2	0	0	0	0	0	4
RS_GCF_900094925.1	d__Bacteria	p__Proteobacteria	c__Gammaproteobacteria	o__Enterobacterales	f__Enterobacteriaceae	g__Kosakonia	s__Kosakonia oryzendophytica	4	0	0	0	0	0	0	0	4
RS_GCF_900141745.1	d__Bacteria	p__Proteobacteria	c__Gammaproteobacteria	o__Burkholderiales	f__Burkholderiaceae	g__Paraburkholderia	s__Paraburkholderia phenazinium_B	4	0	0	0	0	0	0	0	4
GB_GCA_003228495.1	d__Bacteria	p__Nitrospirota	c__Nitrospiria	o__Nitrospirales	f__UBA8639	g__UBA8639	s__UBA8639 sp003228495	0	0	0	0	0	0	0	4	4
RS_GCF_001467895.1	d__Bacteria	p__Proteobacteria	c__Gammaproteobacteria	o__Legionellales	f__Legionellaceae	g__Tatlockia	s__Tatlockia nautarum	4	0	0	0	0	0	0	0	4
RS_GCF_900142845.1	d__Bacteria	p__Proteobacteria	c__Gammaproteobacteria	o__Burkholderiales	f__Burkholderiaceae	g__Paraburkholderia	s__Paraburkholderia phenazinium_A	4	0	0	0	0	0	0	0	4
RS_GCF_000204075.1	d__Bacteria	p__Cyanobacteria	c__Cyanobacteriia	o__Cyanobacteriales	f__Nostocaceae	g__Trichormus	s__Trichormus variabilis	4	0	0	0	0	0	0	0	4
RS_GCF_900167455.1	d__Bacteria	p__Proteobacteria	c__Alphaproteobacteria	o__Reyranellales	f__Reyranellaceae	g__Enhydrobacter	s__Enhydrobacter aerosaccus	3	0	0	0	0	0	1	0	4
RS_GCF_001653075.1	d__Bacteria	p__Actinobacteriota	c__Actinobacteria	o__Streptosporangiales	f__Streptosporangiaceae	g__Planomonospora	s__Planomonospora sphaerica	4	0	0	0	0	0	0	0	4
RS_GCF_001078575.1	d__Bacteria	p__Proteobacteria	c__Gammaproteobacteria	o__Burkholderiales	f__Burkholderiaceae	g__Ralstonia	s__Ralstonia sp001078575	4	0	0	0	0	0	0	0	4
GB_GCA_002737345.1	d__Bacteria	p__Nitrospirota	c__Nitrospiria	o__Nitrospirales	f__Nitrospiraceae	g__Palsa-1315	s__Palsa-1315 sp002737345	0	0	0	0	0	0	0	4	4
RS_GCF_000413855.1	d__Bacteria	p__Proteobacteria	c__Gammaproteobacteria	o__Pseudomonadales	f__Moraxellaceae	g__Acinetobacter	s__Acinetobacter gyllenbergii	4	0	0	0	0	0	0	0	4
RS_GCF_001650735.1	d__Bacteria	p__Proteobacteria	c__Alphaproteobacteria	o__Sphingomonadales	f__Sphingomonadaceae	g__Sphingomonas	s__Sphingomonas sp001650735	4	0	0	0	0	0	0	0	4
GB_GCA_003268775.1	d__Bacteria	p__Proteobacteria	c__Gammaproteobacteria	o__Burkholderiales	f__Burkholderiaceae	g__Paraburkholderia_B	s__Paraburkholderia_B unamae	4	0	0	0	0	0	0	0	4
RS_GCF_900175965.1	d__Bacteria	p__Actinobacteriota	c__Rubrobacteria	o__Rubrobacterales	f__Rubrobacteraceae	g__Rubrobacter	s__Rubrobacter radiotolerans	2	0	0	0	0	0	0	2	4
GB_GCA_002698575.1	d__Bacteria	p__Actinobacteriota	c__Actinobacteria	o__Propionibacteriales	f__Nocardioidaceae	g__Nocardioides	s__Nocardioides sp002698575	1	0	3	0	0	0	0	0	4
RS_GCF_002028405.1	d__Bacteria	p__Proteobacteria	c__Gammaproteobacteria	o__Burkholderiales	f__Burkholderiaceae	g__Thiomonas	s__Thiomonas intermedia	2	0	0	0	0	0	2	0	4
RS_GCF_000400715.1	d__Bacteria	p__Proteobacteria	c__Gammaproteobacteria	o__Pseudomonadales	f__Moraxellaceae	g__Acinetobacter	s__Acinetobacter sp000400715	4	0	0	0	0	0	0	0	4
GB_GCA_002909855.2	d__Bacteria	p__Proteobacteria	c__Gammaproteobacteria	o__Burkholderiales	f__Chromobacteriaceae	g__Aquitalea	s__Aquitalea sp002909855	4	0	0	0	0	0	0	0	4
RS_GCF_002753995.1	d__Bacteria	p__Proteobacteria	c__Gammaproteobacteria	o__Pseudomonadales	f__Pseudomonadaceae	g__Pseudomonas_E	s__Pseudomonas_E sp002753995	4	0	0	0	0	0	0	0	4
RS_GCF_000702385.1	d__Bacteria	p__Proteobacteria	c__Alphaproteobacteria	o__Rhizobiales	f__Xanthobacteraceae	g__Xanthobacter	s__Xanthobacter sp000702385	3	0	0	0	0	0	1	0	4
RS_GCF_000714545.1	d__Bacteria	p__Proteobacteria	c__Alphaproteobacteria	o__Rhodobacterales	f__Rhodobacteraceae	g__Thioclava	s__Thioclava indica	4	0	0	0	0	0	0	0	4
RS_GCF_001905845.1	d__Bacteria	p__Actinobacteriota	c__Actinobacteria	o__Streptomycetales	f__Streptomycetaceae	g__Streptomyces	s__Streptomyces sp001905845	2	0	2	0	0	0	0	0	4
RS_GCF_000826545.1	d__Bacteria	p__Actinobacteriota	c__Actinobacteria	o__Mycobacteriales	f__Pseudonocardiaceae	g__Kibdelosporangium	s__Kibdelosporangium sp000826545	4	0	0	0	0	0	0	0	4
GB_GCA_002869855.1	d__Bacteria	p__Nitrospirota	c__Nitrospiria	o__Nitrospirales	f__Nitrospiraceae	g__Nitrospira_D	s__Nitrospira_D sp002869855	0	0	0	0	0	0	0	4	4
RS_GCF_000685075.1	d__Bacteria	p__Proteobacteria	c__Gammaproteobacteria	o__Burkholderiales	f__Burkholderiaceae	g__Paraburkholderia_B	s__Paraburkholderia_B oxyphila	3	0	0	0	0	0	1	0	4
RS_GCF_002902965.1	d__Bacteria	p__Proteobacteria	c__Gammaproteobacteria	o__Burkholderiales	f__Burkholderiaceae	g__Paraburkholderia_A	s__Paraburkholderia_A hospita	4	0	0	0	0	0	0	0	4
RS_GCF_900119165.1	d__Bacteria	p__Actinobacteriota	c__Actinobacteria	o__Mycobacteriales	f__Pseudonocardiaceae	g__Amycolatopsis	s__Amycolatopsis australiensis	3	0	1	0	0	0	0	0	4
RS_GCF_900230185.1	d__Bacteria	p__Proteobacteria	c__Gammaproteobacteria	o__Burkholderiales	f__Burkholderiaceae	g__Paraburkholderia	s__Paraburkholderia sp900230185	4	0	0	0	0	0	0	0	4
RS_GCF_900116535.1	d__Bacteria	p__Proteobacteria	c__Gammaproteobacteria	o__Enterobacterales	f__Enterobacteriaceae	g__Kosakonia	s__Kosakonia arachidis	4	0	0	0	0	0	0	0	4
RS_GCF_000695625.1	d__Bacteria	p__Actinobacteriota	c__Actinobacteria	o__Mycobacteriales	f__Pseudonocardiaceae	g__Amycolatopsis	s__Amycolatopsis rifamycinica	3	0	1	0	0	0	0	0	4
RS_GCF_900099825.1	d__Bacteria	p__Proteobacteria	c__Alphaproteobacteria	o__Rhizobiales	f__Xanthobacteraceae	g__Bradyrhizobium	s__Bradyrhizobium ottawaense_A	4	0	0	0	0	0	0	0	4
RS_GCF_001279775.1	d__Bacteria	p__Actinobacteriota	c__Actinobacteria	o__Streptomycetales	f__Streptomycetaceae	g__Streptomyces	s__Streptomyces sp001279775	3	0	1	0	0	0	0	0	4
GB_GCA_002722295.1	d__Bacteria	p__Proteobacteria	c__Alphaproteobacteria	o__Rhizobiales	f__Stappiaceae	g__Stappia	s__Stappia sp002722295	4	0	0	0	0	0	0	0	4
GB_GCA_002685915.1	d__Bacteria	p__Proteobacteria	c__Gammaproteobacteria	o__Pseudomonadales	f__Marinomonadaceae	g__Marinomonas	s__Marinomonas sp002685915	4	0	0	0	0	0	0	0	4
RS_GCF_000759755.1	d__Bacteria	p__Proteobacteria	c__Gammaproteobacteria	o__Enterobacterales	f__Enterobacteriaceae	g__Citrobacter	s__Citrobacter werkmanii	4	0	0	0	0	0	0	0	4
GB_GCA_002360945.1	d__Bacteria	p__Proteobacteria	c__Gammaproteobacteria	o__Enterobacterales	f__Enterobacteriaceae	g__Leclercia	s__Leclercia adecarboxylata_B	4	0	0	0	0	0	0	0	4
GB_GCA_900323885.1	d__Bacteria	p__Actinobacteriota	c__Actinobacteria	o__Streptosporangiales	f__Streptosporangiaceae	g__Nonomuraea	s__Nonomuraea parvosata	4	0	0	0	0	0	0	0	4
GB_GCA_900467885.1	d__Bacteria	p__Proteobacteria	c__Alphaproteobacteria	o__Rhizobiales	f__Rhizobiaceae	g__Rhizobium	s__Rhizobium sp900467885	4	0	0	0	0	0	0	0	4
RS_GCF_001591605.1	d__Bacteria	p__Firmicutes	c__Bacilli	o__Bacillales	f__Domibacillaceae	g__Bacillus_N	s__Bacillus_N badius	0	0	0	3	0	0	1	0	4
RS_GCF_002161855.1	d__Bacteria	p__Firmicutes_I	c__Bacilli_A	o__Paenibacillales	f__Paenibacillaceae	g__Paenibacillus_B	s__Paenibacillus_B thiaminolyticus	2	0	0	2	0	0	0	0	4
RS_GCF_000429985.1	d__Bacteria	p__Desulfobacterota_A	c__Desulfovibrionia	o__Desulfovibrionales	f__Desulfovibrionaceae	g__Desulfovibrio_H	s__Desulfovibrio_H bastinii	1	0	0	0	0	0	3	0	4
RS_GCF_900110055.1	d__Bacteria	p__Firmicutes_I	c__Bacilli_A	o__Paenibacillales	f__Paenibacillaceae	g__Paenibacillus	s__Paenibacillus sp900110055	1	0	0	3	0	0	0	0	4
RS_GCF_000373625.1	d__Bacteria	p__Actinobacteriota	c__Actinobacteria	o__Streptomycetales	f__Streptomycetaceae	g__Streptomyces	s__Streptomyces sp000373625	3	0	1	0	0	0	0	0	4
RS_GCF_000725795.1	d__Bacteria	p__Actinobacteriota	c__Actinobacteria	o__Streptomycetales	f__Streptomycetaceae	g__Streptomyces	s__Streptomyces seoulensis	3	0	1	0	0	0	0	0	4
RS_GCF_000959525.1	d__Bacteria	p__Proteobacteria	c__Gammaproteobacteria	o__Burkholderiales	f__Burkholderiaceae	g__Burkholderia	s__Burkholderia multivorans	4	0	0	0	0	0	0	0	4
RS_GCF_900104795.1	d__Bacteria	p__Proteobacteria	c__Gammaproteobacteria	o__Burkholderiales	f__Burkholderiaceae	g__Paraburkholderia	s__Paraburkholderia sp900104795	4	0	0	0	0	0	0	0	4
GB_GCA_002455995.1	d__Bacteria	p__Proteobacteria	c__Gammaproteobacteria	o__Enterobacterales	f__Enterobacteriaceae	g__Leclercia	s__Leclercia adecarboxylata_C	4	0	0	0	0	0	0	0	4
RS_GCF_000189295.2	d__Bacteria	p__Desulfobacterota_A	c__Desulfovibrionia	o__Desulfovibrionales	f__Desulfovibrionaceae	g__Pseudodesulfovibrio	s__Pseudodesulfovibrio desulfuricans	1	0	0	0	0	0	3	0	4
RS_GCF_000007145.1	d__Bacteria	p__Proteobacteria	c__Gammaproteobacteria	o__Xanthomonadales	f__Xanthomonadaceae	g__Xanthomonas	s__Xanthomonas campestris	4	0	0	0	0	0	0	0	4
RS_GCF_001517405.1	d__Bacteria	p__Proteobacteria	c__Gammaproteobacteria	o__Enterobacterales	f__Enterobacteriaceae	g__Erwinia_B	s__Erwinia_B gerundensis	4	0	0	0	0	0	0	0	4
RS_GCF_900100345.1	d__Bacteria	p__Firmicutes_I	c__Bacilli_A	o__Paenibacillales	f__Paenibacillaceae	g__Paenibacillus_G	s__Paenibacillus_G tianmuensis	1	0	0	2	0	0	1	0	4
GB_GCA_002377245.1	d__Bacteria	p__Proteobacteria	c__Gammaproteobacteria	o__Enterobacterales	f__Enterobacteriaceae	g__Metakosakonia	s__Metakosakonia sp002377245	4	0	0	0	0	0	0	0	4
RS_GCF_900187015.1	d__Bacteria	p__Proteobacteria	c__Gammaproteobacteria	o__Enterobacterales	f__Enterobacteriaceae	g__Serratia	s__Serratia ficaria	4	0	0	0	0	0	0	0	4
GB_GCA_001898235.1	d__Bacteria	p__Proteobacteria	c__Gammaproteobacteria	o__Berkiellales	f__Berkiellaceae	g__Berkiella	s__Berkiella sp001898235	4	0	0	0	0	0	0	0	4
RS_GCF_002011925.2	d__Bacteria	p__Proteobacteria	c__Gammaproteobacteria	o__Burkholderiales	f__Burkholderiaceae	g__Cupriavidus	s__Cupriavidus sp002011925	4	0	0	0	0	0	0	0	4
RS_GCF_001570405.1	d__Bacteria	p__Actinobacteriota	c__Actinobacteria	o__Streptosporangiales	f__Streptosporangiaceae	g__Microtetraspora	s__Microtetraspora niveoalba	3	0	1	0	0	0	0	0	4
RS_GCF_900478215.1	d__Bacteria	p__Proteobacteria	c__Gammaproteobacteria	o__Enterobacterales	f__Enterobacteriaceae	g__Salmonella	s__Salmonella enterica_D	4	0	0	0	0	0	0	0	4
RS_GCF_000511135.2	d__Bacteria	p__Actinobacteriota	c__Actinobacteria	o__Streptosporangiales	f__Streptosporangiaceae	g__Microbispora	s__Microbispora sp000511135	3	0	1	0	0	0	0	0	4
RS_GCF_000283315.1	d__Bacteria	p__Firmicutes_I	c__Bacilli_A	o__Paenibacillales	f__Paenibacillaceae	g__Paenibacillus_B	s__Paenibacillus_B sp000283315	2	0	0	2	0	0	0	0	4
RS_GCF_001718795.1	d__Bacteria	p__Proteobacteria	c__Gammaproteobacteria	o__Burkholderiales	f__Burkholderiaceae	g__Burkholderia	s__Burkholderia latens	4	0	0	0	0	0	0	0	4
RS_GCF_000725485.1	d__Bacteria	p__Actinobacteriota	c__Actinobacteria	o__Streptosporangiales	f__Streptosporangiaceae	g__Nonomuraea	s__Nonomuraea candida	4	0	0	0	0	0	0	0	4
RS_GCF_900094795.1	d__Bacteria	p__Proteobacteria	c__Gammaproteobacteria	o__Enterobacterales	f__Enterobacteriaceae	g__Kosakonia	s__Kosakonia oryziphila	4	0	0	0	0	0	0	0	4
RS_GCF_001544915.2	d__Bacteria	p__Proteobacteria	c__Gammaproteobacteria	o__Burkholderiales	f__Burkholderiaceae	g__Caballeronia	s__Caballeronia pedi	4	0	0	0	0	0	0	0	4
RS_GCF_002858675.1	d__Bacteria	p__Proteobacteria	c__Gammaproteobacteria	o__Enterobacterales	f__Enterobacteriaceae	g__Nissabacter	s__Nissabacter sp002858675	4	0	0	0	0	0	0	0	4
GB_GCA_002435325.1	d__Bacteria	p__Nitrospirota	c__Nitrospiria	o__Nitrospirales	f__Nitrospiraceae	g__Nitrospira_D	s__Nitrospira_D sp002435325	0	0	0	0	0	0	0	4	4
RS_GCF_002917095.1	d__Bacteria	p__Proteobacteria	c__Gammaproteobacteria	o__Burkholderiales	f__Burkholderiaceae	g__Paraburkholderia_B	s__Paraburkholderia_B eburnea	4	0	0	0	0	0	0	0	4
RS_GCF_003057575.1	d__Bacteria	p__Firmicutes_I	c__Bacilli_A	o__Paenibacillales	f__Paenibacillaceae	g__Paenibacillus_G	s__Paenibacillus_G elgii	1	0	0	2	0	0	1	0	4
RS_GCF_000684975.1	d__Bacteria	p__Proteobacteria	c__Gammaproteobacteria	o__Burkholderiales	f__Burkholderiaceae	g__Paraburkholderia_B	s__Paraburkholderia_B acidipaludis	3	0	0	0	0	0	1	0	4
RS_GCF_000959505.1	d__Bacteria	p__Proteobacteria	c__Gammaproteobacteria	o__Burkholderiales	f__Burkholderiaceae	g__Burkholderia	s__Burkholderia dolosa	4	0	0	0	0	0	0	0	4
RS_GCF_001718335.1	d__Bacteria	p__Proteobacteria	c__Gammaproteobacteria	o__Burkholderiales	f__Burkholderiaceae	g__Burkholderia	s__Burkholderia territorii	4	0	0	0	0	0	0	0	4
GB_GCA_003233615.1	d__Bacteria	p__Nitrospirota	c__Nitrospiria	o__Nitrospirales	f__UBA8639	g__UBA8639	s__UBA8639 sp003233615	0	0	0	0	0	0	0	4	4
RS_GCF_003111705.1	d__Bacteria	p__Proteobacteria	c__Alphaproteobacteria	o__Rhizobiales	f__Beijerinckiaceae	g__Methylobacterium	s__Methylobacterium sp003111705	4	0	0	0	0	0	0	0	4
RS_GCF_001544575.2	d__Bacteria	p__Proteobacteria	c__Gammaproteobacteria	o__Burkholderiales	f__Burkholderiaceae	g__Caballeronia	s__Caballeronia cordobensis	4	0	0	0	0	0	0	0	4
GB_GCA_001316005.1	d__Archaea	p__Crenarchaeota	c__Thermoprotei	o__Thermoproteales	f__Thermocladiaceae	g__Vulcanisaeta	s__Vulcanisaeta distributa_B	0	0	0	0	2	1	0	0	3
RS_GCF_900111485.1	d__Archaea	p__Halobacterota	c__Halobacteria	o__Halobacteriales	f__Natrialbaceae	g__Natrinema	s__Natrinema hispanica	3	0	0	0	0	0	0	0	3
RS_GCF_000739575.1	d__Archaea	p__Halobacterota	c__Halobacteria	o__Halobacteriales	f__Haloferacaceae	g__Halobellus	s__Halobellus rufus	3	0	0	0	0	0	0	0	3
GB_GCA_002499005.1	d__Archaea	p__Crenarchaeota	c__Nitrososphaeria	o__UBA164	f__UBA164	g__UBA164	s__UBA164 sp002499005	0	0	0	1	1	1	0	0	3
GB_GCA_002715145.1	d__Bacteria	p__Proteobacteria	c__Gammaproteobacteria	o__Pseudomonadales	f__Halomonadaceae	g__Halomonas	s__Halomonas sp002715145	3	0	0	0	0	0	0	0	3
RS_GCF_002803155.1	d__Bacteria	p__Actinobacteriota	c__Actinobacteria	o__Streptomycetales	f__Streptomycetaceae	g__Streptomyces	s__Streptomyces sp002803155	3	0	0	0	0	0	0	0	3
RS_GCF_000196475.1	d__Bacteria	p__Proteobacteria	c__Gammaproteobacteria	o__Enterobacterales	f__Enterobacteriaceae	g__Photorhabdus	s__Photorhabdus asymbiotica	3	0	0	0	0	0	0	0	3
GB_GCA_001799365.1	d__Bacteria	p__Desulfobacterota	c__Desulfobulbia	o__Desulfobulbales	f__Desulfocapsaceae	g__Desulforhopalus	s__Desulforhopalus sp001799365	2	0	0	0	0	0	1	0	3
RS_GCF_001860525.1	d__Bacteria	p__Firmicutes_I	c__Bacilli_A	o__Paenibacillales	f__Paenibacillaceae	g__Paenibacillus	s__Paenibacillus sp001860525	1	0	0	2	0	0	0	0	3
RS_GCF_000341245.1	d__Bacteria	p__Actinobacteriota	c__Actinobacteria	o__Streptosporangiales	f__Streptosporangiaceae	g__Nocardiopsis_A	s__Nocardiopsis_A halophila	3	0	0	0	0	0	0	0	3
RS_GCF_000204155.1	d__Bacteria	p__Actinobacteriota	c__Actinobacteria	o__Mycobacteriales	f__Micromonosporaceae	g__Micromonospora	s__Micromonospora maris	3	0	0	0	0	0	0	0	3
RS_GCF_001275035.1	d__Bacteria	p__Proteobacteria	c__Gammaproteobacteria	o__Enterobacterales	f__Alteromonadaceae	g__Pararheinheimera	s__Pararheinheimera sp001275035	3	0	0	0	0	0	0	0	3
RS_GCF_003024515.1	d__Bacteria	p__Proteobacteria	c__Gammaproteobacteria	o__Pseudomonadales	f__Moraxellaceae	g__Acinetobacter	s__Acinetobacter sp003024515	3	0	0	0	0	0	0	0	3
RS_GCF_003148725.1	d__Bacteria	p__Proteobacteria	c__Gammaproteobacteria	o__Burkholderiales	f__Burkholderiaceae	g__Cupriavidus	s__Cupriavidus plantarum	3	0	0	0	0	0	0	0	3
RS_GCF_000773685.1	d__Bacteria	p__Proteobacteria	c__Gammaproteobacteria	o__Pseudomonadales	f__Moraxellaceae	g__Acinetobacter	s__Acinetobacter sp000773685	3	0	0	0	0	0	0	0	3
RS_GCF_000179315.1	d__Bacteria	p__Desulfobacterota	c__Desulfobacteria	o__Desulfatiglandales	f__NaphS2	g__NaphS2	s__NaphS2 sp000179315	1	0	0	0	0	0	0	2	3
RS_GCF_002163585.1	d__Bacteria	p__Proteobacteria	c__Gammaproteobacteria	o__Enterobacterales	f__Enterobacteriaceae	g__Tatumella	s__Tatumella citrea	3	0	0	0	0	0	0	0	3
GB_GCA_002388125.1	d__Bacteria	p__Proteobacteria	c__Gammaproteobacteria	o__Enterobacterales	f__Enterobacteriaceae	g__Atlantibacter	s__Atlantibacter sp002388125	3	0	0	0	0	0	0	0	3
RS_GCF_000472385.1	d__Bacteria	p__Proteobacteria	c__Alphaproteobacteria	o__Rhizobiales	f__Xanthobacteraceae	g__Bradyrhizobium	s__Bradyrhizobium sp000472385	3	0	0	0	0	0	0	0	3
RS_GCF_000369805.1	d__Bacteria	p__Proteobacteria	c__Gammaproteobacteria	o__Pseudomonadales	f__Moraxellaceae	g__Acinetobacter	s__Acinetobacter sp000369805	3	0	0	0	0	0	0	0	3
RS_GCF_002101395.1	d__Bacteria	p__Proteobacteria	c__Gammaproteobacteria	o__Enterobacterales	f__Enterobacteriaceae	g__Pantoea_B	s__Pantoea_B alhagi	3	0	0	0	0	0	0	0	3
RS_GCF_001742165.1	d__Bacteria	p__Proteobacteria	c__Gammaproteobacteria	o__Burkholderiales	f__Burkholderiaceae	g__Burkholderia	s__Burkholderia stabilis	3	0	0	0	0	0	0	0	3
RS_GCF_001875645.1	d__Bacteria	p__Proteobacteria	c__Gammaproteobacteria	o__Enterobacterales	f__Enterobacteriaceae	g__Enterobacter	s__Enterobacter nimipressuralis	3	0	0	0	0	0	0	0	3
RS_GCF_001037495.1	d__Bacteria	p__Proteobacteria	c__Gammaproteobacteria	o__Enterobacterales	f__Enterobacteriaceae	g__Citrobacter	s__Citrobacter sp001037495	3	0	0	0	0	0	0	0	3
RS_GCF_001276875.1	d__Bacteria	p__Proteobacteria	c__Gammaproteobacteria	o__Enterobacterales	f__Enterobacteriaceae	g__Salmonella	s__Salmonella enterica_C	3	0	0	0	0	0	0	0	3
RS_GCF_000369565.1	d__Bacteria	p__Proteobacteria	c__Gammaproteobacteria	o__Pseudomonadales	f__Moraxellaceae	g__Acinetobacter	s__Acinetobacter sp000369565	3	0	0	0	0	0	0	0	3
RS_GCF_001022675.1	d__Bacteria	p__Proteobacteria	c__Gammaproteobacteria	o__Enterobacterales	f__Enterobacteriaceae	g__Enterobacter	s__Enterobacter cloacae_H	3	0	0	0	0	0	0	0	3
RS_GCF_001995845.1	d__Bacteria	p__Proteobacteria	c__Gammaproteobacteria	o__Enterobacterales	f__Vibrionaceae	g__Salinivibrio	s__Salinivibrio kushneri	3	0	0	0	0	0	0	0	3
RS_GCF_002813365.1	d__Bacteria	p__Actinobacteriota	c__Actinobacteria	o__Streptomycetales	f__Streptomycetaceae	g__Kitasatospora	s__Kitasatospora sp002813365	2	0	1	0	0	0	0	0	3
GB_GCA_001920235.1	d__Bacteria	p__Chloroflexota	c__Ktedonobacteria	o__Ktedonobacterales	f__Ktedonobacteraceae	g__UBA11361	s__UBA11361 sp001920235	0	0	3	0	0	0	0	0	3
RS_GCF_000729995.1	d__Bacteria	p__Proteobacteria	c__Gammaproteobacteria	o__Burkholderiales	f__Burkholderiaceae	g__Caballeronia	s__Caballeronia sordidicola_A	3	0	0	0	0	0	0	0	3
RS_GCF_002813325.1	d__Bacteria	p__Proteobacteria	c__Gammaproteobacteria	o__Burkholderiales	f__Burkholderiaceae	g__Janthinobacterium	s__Janthinobacterium sp002813325	3	0	0	0	0	0	0	0	3
RS_GCF_900322725.1	d__Bacteria	p__Proteobacteria	c__Gammaproteobacteria	o__Enterobacterales	f__Enterobacteriaceae	g__Enterobacter	s__Enterobacter cloacae_J	3	0	0	0	0	0	0	0	3
RS_GCF_002879885.1	d__Bacteria	p__Proteobacteria	c__Gammaproteobacteria	o__Burkholderiales	f__Burkholderiaceae	g__Paraburkholderia_E	s__Paraburkholderia_E dabaoshanensis	3	0	0	0	0	0	0	0	3
RS_GCF_000314855.2	d__Bacteria	p__Proteobacteria	c__Gammaproteobacteria	o__Enterobacterales	f__Enterobacteriaceae	g__Providencia	s__Providencia burhodogranariea	3	0	0	0	0	0	0	0	3
RS_GCF_000620205.1	d__Bacteria	p__Actinobacteriota	c__Actinobacteria	o__Mycobacteriales	f__Geodermatophilaceae	g__Modestobacter	s__Modestobacter sp000620205	2	0	1	0	0	0	0	0	3
RS_GCF_000832605.1	d__Bacteria	p__Firmicutes	c__Bacilli	o__Bacillales	f__Bacillaceae_G	g__Bacillus_A	s__Bacillus_A mycoides	2	0	0	1	0	0	0	0	3
GB_GCA_003156495.1	d__Bacteria	p__Acidobacteriota	c__Acidobacteriae	o__Acidobacteriales	f__Acidobacteriaceae	g__Terracidiphilus	s__Terracidiphilus sp003156495	1	0	0	0	0	0	2	0	3
RS_GCF_000969395.1	d__Bacteria	p__Proteobacteria	c__Gammaproteobacteria	o__Enterobacterales	f__Enterobacteriaceae	g__Pantoea	s__Pantoea anthophila	3	0	0	0	0	0	0	0	3
RS_GCF_000368265.1	d__Bacteria	p__Proteobacteria	c__Gammaproteobacteria	o__Pseudomonadales	f__Moraxellaceae	g__Acinetobacter	s__Acinetobacter sp000368265	3	0	0	0	0	0	0	0	3
RS_GCF_002127585.1	d__Bacteria	p__Proteobacteria	c__Gammaproteobacteria	o__Burkholderiales	f__Burkholderiaceae	g__Janthinobacterium	s__Janthinobacterium sp002127585	3	0	0	0	0	0	0	0	3
RS_GCF_000368145.1	d__Bacteria	p__Proteobacteria	c__Gammaproteobacteria	o__Pseudomonadales	f__Moraxellaceae	g__Acinetobacter	s__Acinetobacter guillouiae	3	0	0	0	0	0	0	0	3
RS_GCF_000951135.1	d__Bacteria	p__Proteobacteria	c__Gammaproteobacteria	o__Enterobacterales	f__Enterobacteriaceae	g__Rouxiella	s__Rouxiella chamberiensis	3	0	0	0	0	0	0	0	3
GB_GCA_003023725.1	d__Bacteria	p__Firmicutes_E	c__Sulfobacillia	o__Sulfobacillales	f__Sulfobacillaceae	g__Sulfobacillus	s__Sulfobacillus benefaciens	3	0	0	0	0	0	0	0	3
RS_GCF_001544515.1	d__Bacteria	p__Proteobacteria	c__Gammaproteobacteria	o__Burkholderiales	f__Burkholderiaceae	g__Caballeronia	s__Caballeronia terrestris	3	0	0	0	0	0	0	0	3
RS_GCF_000755535.1	d__Bacteria	p__Proteobacteria	c__Gammaproteobacteria	o__Enterobacterales	f__Enterobacteriaceae	g__Leclercia	s__Leclercia sp000755535	3	0	0	0	0	0	0	0	3
RS_GCF_001894745.1	d__Bacteria	p__Firmicutes_I	c__Bacilli_A	o__Paenibacillales	f__Paenibacillaceae	g__Paenibacillus_B	s__Paenibacillus_B sp001894745	2	0	0	1	0	0	0	0	3
RS_GCF_000286835.2	d__Bacteria	p__Proteobacteria	c__Gammaproteobacteria	o__Enterobacterales	f__Vibrionaceae	g__Enterovibrio	s__Enterovibrio norvegicus_A	3	0	0	0	0	0	0	0	3
GB_GCA_001769805.1	d__Bacteria	p__Bdellovibrionota	c__Bacteriovoracia	o__UBA1018	f__UBA1018	g__GWA1-52-35	s__GWA1-52-35 sp001769805	1	0	1	0	0	0	1	0	3
RS_GCF_000019945.1	d__Bacteria	p__Proteobacteria	c__Alphaproteobacteria	o__Rhizobiales	f__Beijerinckiaceae	g__Methylobacterium	s__Methylobacterium populi	3	0	0	0	0	0	0	0	3
RS_GCF_000369645.1	d__Bacteria	p__Proteobacteria	c__Gammaproteobacteria	o__Pseudomonadales	f__Moraxellaceae	g__Acinetobacter	s__Acinetobacter sp000369645	3	0	0	0	0	0	0	0	3
RS_GCF_900104845.1	d__Bacteria	p__Proteobacteria	c__Gammaproteobacteria	o__Burkholderiales	f__Burkholderiaceae	g__Paraburkholderia_B	s__Paraburkholderia_B caballeronis	3	0	0	0	0	0	0	0	3
GB_GCA_000173575.1	d__Bacteria	p__Proteobacteria	c__Gammaproteobacteria	o__Burkholderiales	f__Burkholderiaceae	g__Paraburkholderia	s__Paraburkholderia sp000173575	3	0	0	0	0	0	0	0	3
GB_GCA_003139995.1	d__Bacteria	p__Acidobacteriota	c__Acidobacteriae	o__Acidobacteriales	f__Koribacteraceae	g__Bog-209	s__Bog-209 sp003139995	1	0	0	0	0	0	2	0	3
RS_GCF_000377965.1	d__Bacteria	p__Actinobacteriota	c__Actinobacteria	o__Streptomycetales	f__Streptomycetaceae	g__Streptomyces	s__Streptomyces sp000377965	3	0	0	0	0	0	0	0	3
RS_GCF_001545035.1	d__Bacteria	p__Proteobacteria	c__Gammaproteobacteria	o__Burkholderiales	f__Burkholderiaceae	g__Caballeronia	s__Caballeronia glebae	3	0	0	0	0	0	0	0	3
RS_GCF_001908725.1	d__Bacteria	p__Proteobacteria	c__Gammaproteobacteria	o__Xanthomonadales	f__Xanthomonadaceae	g__Xanthomonas	s__Xanthomonas vesicatoria	3	0	0	0	0	0	0	0	3
RS_GCF_000423665.1	d__Bacteria	p__Actinobacteriota	c__Thermoleophilia	o__Solirubrobacterales	f__Solirubrobacteraceae	g__Solirubrobacter	s__Solirubrobacter soli	2	0	1	0	0	0	0	0	3
RS_GCF_900129025.1	d__Bacteria	p__Bacteroidota	c__Bacteroidia	o__Bacteroidales	f__Prolixibacteraceae	g__Mariniphaga	s__Mariniphaga anaerophila	1	0	1	0	0	0	1	0	3
GB_GCA_003133645.1	d__Bacteria	p__Acidobacteriota	c__Thermoanaerobaculia	o__Thermoanaerobaculales	f__Thermoanaerobaculaceae	g__RBG-13-68-16	s__RBG-13-68-16 sp003133645	1	0	0	0	0	0	2	0	3
RS_GCF_001028175.1	d__Bacteria	p__Proteobacteria	c__Gammaproteobacteria	o__Burkholderiales	f__Burkholderiaceae	g__Caballeronia	s__Caballeronia mineralivorans	3	0	0	0	0	0	0	0	3
RS_GCF_000425205.1	d__Bacteria	p__Firmicutes	c__Bacilli	o__Bacillales	f__Halobacillaceae_A	g__Pontibacillus_A	s__Pontibacillus_A halophilus	1	0	0	2	0	0	0	0	3
RS_GCF_002874155.1	d__Bacteria	p__Proteobacteria	c__Gammaproteobacteria	o__Enterobacterales	f__Vibrionaceae	g__Vibrio	s__Vibrio lentus_B	3	0	0	0	0	0	0	0	3
RS_GCF_000772705.2	d__Bacteria	p__Proteobacteria	c__Gammaproteobacteria	o__Xanthomonadales	f__Xanthomonadaceae	g__Xanthomonas	s__Xanthomonas vasicola	3	0	0	0	0	0	0	0	3
RS_GCF_001750725.1	d__Bacteria	p__Proteobacteria	c__Gammaproteobacteria	o__Enterobacterales	f__Enterobacteriaceae	g__Enterobacter	s__Enterobacter ludwigii	3	0	0	0	0	0	0	0	3
RS_GCF_900078515.1	d__Bacteria	p__Nitrospirota	c__Nitrospiria	o__Nitrospirales	f__Nitrospiraceae	g__Nitrospira	s__Nitrospira sp900078515	0	0	0	0	0	0	0	3	3
RS_GCF_001642575.1	d__Bacteria	p__Proteobacteria	c__Gammaproteobacteria	o__Xanthomonadales	f__Xanthomonadaceae	g__Xanthomonas	s__Xanthomonas floridensis	3	0	0	0	0	0	0	0	3
RS_GCF_900103445.1	d__Bacteria	p__Proteobacteria	c__Alphaproteobacteria	o__Rhizobiales	f__Beijerinckiaceae	g__Methylobacterium	s__Methylobacterium phyllostachyos	3	0	0	0	0	0	0	0	3
RS_GCF_003259935.1	d__Bacteria	p__Firmicutes	c__Bacilli	o__Bacillales	f__Anoxybacillaceae	g__Anoxybacillus_B	s__Anoxybacillus_B vitaminiphilus	0	0	0	2	0	0	1	0	3
RS_GCF_900141875.1	d__Bacteria	p__Bacteroidota	c__Bacteroidia	o__Bacteroidales	f__Prolixibacteraceae	g__Tangfeifania	s__Tangfeifania diversioriginum	1	0	1	0	0	0	1	0	3
RS_GCF_001696615.2	d__Bacteria	p__Proteobacteria	c__Gammaproteobacteria	o__Pseudomonadales	f__Moraxellaceae	g__Acinetobacter	s__Acinetobacter sp001696615	3	0	0	0	0	0	0	0	3
RS_GCF_001558015.1	d__Bacteria	p__Proteobacteria	c__Gammaproteobacteria	o__Enterobacterales	f__Vibrionaceae	g__Vibrio	s__Vibrio splendidus	3	0	0	0	0	0	0	0	3
RS_GCF_002902985.1	d__Bacteria	p__Proteobacteria	c__Gammaproteobacteria	o__Enterobacterales	f__Enterobacteriaceae	g__Leclercia	s__Leclercia sp002902985	3	0	0	0	0	0	0	0	3
RS_GCF_003258805.1	d__Bacteria	p__Proteobacteria	c__Alphaproteobacteria	o__Rhizobiales	f__Xanthobacteraceae	g__Rhodoplanes	s__Rhodoplanes elegans	3	0	0	0	0	0	0	0	3
RS_GCF_000801335.2	d__Bacteria	p__Desulfobacterota_A	c__Desulfovibrionia	o__Desulfovibrionales	f__Desulfovibrionaceae	g__Desulfovibrio_F	s__Desulfovibrio_F sp000801335	2	0	0	0	0	0	1	0	3
RS_GCF_000497835.1	d__Bacteria	p__Proteobacteria	c__Gammaproteobacteria	o__Pseudomonadales	f__Pseudomonadaceae	g__Pseudomonas_E	s__Pseudomonas_E sp000497835	3	0	0	0	0	0	0	0	3
RS_GCF_000428905.1	d__Bacteria	p__Proteobacteria	c__Gammaproteobacteria	o__Enterobacterales	f__Alteromonadaceae	g__Glaciecola	s__Glaciecola pallidula	3	0	0	0	0	0	0	0	3
RS_GCF_000368565.1	d__Bacteria	p__Proteobacteria	c__Gammaproteobacteria	o__Pseudomonadales	f__Moraxellaceae	g__Acinetobacter	s__Acinetobacter gerneri	3	0	0	0	0	0	0	0	3
RS_GCF_000963905.1	d__Bacteria	p__Proteobacteria	c__Alphaproteobacteria	o__Acetobacterales	f__Acetobacteraceae	g__Acetobacter	s__Acetobacter aceti	3	0	0	0	0	0	0	0	3
RS_GCF_002197345.1	d__Bacteria	p__Proteobacteria	c__Gammaproteobacteria	o__Enterobacterales	f__Enterobacteriaceae	g__Enterobacter	s__Enterobacter cloacae_B	3	0	0	0	0	0	0	0	3
RS_GCF_000935045.1	d__Bacteria	p__Proteobacteria	c__Gammaproteobacteria	o__Pseudomonadales	f__Pseudomonadaceae	g__Pseudomonas_E	s__Pseudomonas_E sp000935045	3	0	0	0	0	0	0	0	3
RS_GCF_000245555.1	d__Bacteria	p__Firmicutes_I	c__Bacilli_A	o__Paenibacillales	f__Paenibacillaceae	g__Paenibacillus_B	s__Paenibacillus_B dendritiformis	2	0	0	1	0	0	0	0	3
RS_GCF_003236715.1	d__Bacteria	p__Proteobacteria	c__Gammaproteobacteria	o__Enterobacterales	f__Enterobacteriaceae	g__Pantoea	s__Pantoea sp003236715	3	0	0	0	0	0	0	0	3
RS_GCF_000599885.1	d__Bacteria	p__Proteobacteria	c__Gammaproteobacteria	o__Enterobacterales	f__Enterobacteriaceae	g__Erwinia	s__Erwinia sp000599885	3	0	0	0	0	0	0	0	3
RS_GCF_000495915.1	d__Bacteria	p__Proteobacteria	c__Gammaproteobacteria	o__Pseudomonadales	f__Pseudomonadaceae	g__Pseudomonas_A	s__Pseudomonas_A chloritidismutans	3	0	0	0	0	0	0	0	3
RS_GCF_000243095.1	d__Bacteria	p__Proteobacteria	c__Gammaproteobacteria	o__Burkholderiales	f__Burkholderiaceae	g__Cupriavidus	s__Cupriavidus basilensis_D	3	0	0	0	0	0	0	0	3
RS_GCF_000284295.1	d__Bacteria	p__Actinobacteriota	c__Actinobacteria	o__Mycobacteriales	f__Micromonosporaceae	g__Actinoplanes	s__Actinoplanes missouriensis	2	0	1	0	0	0	0	0	3
RS_GCF_000373765.1	d__Bacteria	p__Proteobacteria	c__Gammaproteobacteria	o__Legionellales	f__Legionellaceae	g__Legionella	s__Legionella shakespearei	3	0	0	0	0	0	0	0	3
RS_GCF_001941945.1	d__Bacteria	p__Proteobacteria	c__Alphaproteobacteria	o__Acetobacterales	f__Acetobacteraceae	g__Roseomonas	s__Roseomonas gilardii	3	0	0	0	0	0	0	0	3
GB_GCA_003202285.1	d__Bacteria	p__Actinobacteriota	c__Actinobacteria	o__Mycobacteriales	f__Pseudonocardiaceae	g__Prauserella_B	s__Prauserella_B muralis	2	0	1	0	0	0	0	0	3
RS_GCF_002975175.1	d__Bacteria	p__Firmicutes	c__Bacilli	o__Bacillales	f__Bacillaceae_G	g__Bacillus_A	s__Bacillus_A sp002975175	2	0	0	1	0	0	0	0	3
RS_GCF_002095385.1	d__Bacteria	p__Proteobacteria	c__Gammaproteobacteria	o__Enterobacterales	f__Enterobacteriaceae	g__Pantoea	s__Pantoea eucrina	3	0	0	0	0	0	0	0	3
RS_GCF_000027065.2	d__Bacteria	p__Proteobacteria	c__Gammaproteobacteria	o__Enterobacterales	f__Enterobacteriaceae	g__Cronobacter	s__Cronobacter turicensis	3	0	0	0	0	0	0	0	3
RS_GCF_000499205.1	d__Bacteria	p__Firmicutes_I	c__Bacilli_A	o__Paenibacillales	f__Paenibacillaceae	g__Paenibacillus	s__Paenibacillus sp000499205	1	0	0	2	0	0	0	0	3
RS_GCF_000399165.1	d__Bacteria	p__Firmicutes	c__Bacilli	o__Bacillales	f__Bacillaceae_G	g__Bacillus_A	s__Bacillus_A cereus_P	2	0	0	1	0	0	0	0	3
RS_GCF_000836725.1	d__Bacteria	p__Firmicutes	c__Bacilli	o__Bacillales	f__Anoxybacillaceae	g__Anoxybacillus	s__Anoxybacillus thermarum	1	0	0	1	0	0	1	0	3
RS_GCF_000176155.1	d__Bacteria	p__Proteobacteria	c__Gammaproteobacteria	o__Enterobacterales	f__Vibrionaceae	g__Vibrio	s__Vibrio metschnikovii	3	0	0	0	0	0	0	0	3
RS_GCF_000465555.2	d__Bacteria	p__Proteobacteria	c__Gammaproteobacteria	o__Enterobacterales	f__Enterobacteriaceae	g__Pantoea	s__Pantoea dispersa	3	0	0	0	0	0	0	0	3
GB_GCA_002753725.1	d__Bacteria	p__Desulfobacterota	c__Desulfobacteria	o__Desulfobacterales	f__Magnetomoraceae	g__Magnetomorum	s__Magnetomorum sp002753725	1	0	0	0	0	0	2	0	3
RS_GCF_900176845.1	d__Bacteria	p__Firmicutes	c__Bacilli	o__Bacillales	f__Bacillaceae_G	g__Bacillus_A	s__Bacillus_A cereus_AX	2	0	0	1	0	0	0	0	3
RS_GCF_000720175.1	d__Bacteria	p__Actinobacteriota	c__Actinobacteria	o__Streptomycetales	f__Streptomycetaceae	g__Streptomyces	s__Streptomyces sp000720175	2	0	1	0	0	0	0	0	3
RS_GCF_001547525.1	d__Bacteria	p__Proteobacteria	c__Gammaproteobacteria	o__Burkholderiales	f__Burkholderiaceae	g__Burkholderia	s__Burkholderia anthina	3	0	0	0	0	0	0	0	3
RS_GCF_001612905.1	d__Bacteria	p__Actinobacteriota	c__Actinobacteria	o__Mycobacteriales	f__Mycobacteriaceae	g__Nocardia	s__Nocardia ignorata	2	0	1	0	0	0	0	0	3
RS_GCF_001439785.1	d__Bacteria	p__Proteobacteria	c__Gammaproteobacteria	o__Pseudomonadales	f__Pseudomonadaceae	g__Pseudomonas_E	s__Pseudomonas_E poae	3	0	0	0	0	0	0	0	3
RS_GCF_002741055.1	d__Bacteria	p__Firmicutes_I	c__Bacilli_A	o__Paenibacillales	f__Paenibacillaceae	g__Paenibacillus	s__Paenibacillus ihbetae	1	0	0	2	0	0	0	0	3
RS_GCF_002934455.1	d__Bacteria	p__Proteobacteria	c__Gammaproteobacteria	o__Burkholderiales	f__Burkholderiaceae	g__Paraburkholderia_E	s__Paraburkholderia_E symbiotica	3	0	0	0	0	0	0	0	3
RS_GCF_000211415.1	d__Bacteria	p__Proteobacteria	c__Gammaproteobacteria	o__Enterobacterales	f__Enterobacteriaceae	g__Enterobacter	s__Enterobacter mori	3	0	0	0	0	0	0	0	3
RS_GCF_001315105.1	d__Bacteria	p__Firmicutes_I	c__Bacilli_A	o__Paenibacillales	f__Paenibacillaceae	g__Paenibacillus	s__Paenibacillus sp001315105	1	0	0	2	0	0	0	0	3
GB_GCA_003265735.1	d__Bacteria	p__Firmicutes_I	c__Bacilli_A	o__Brevibacillales	f__Brevibacillaceae	g__Brevibacillus_B	s__Brevibacillus_B laterosporus_D	1	0	0	2	0	0	0	0	3
GB_GCA_900469475.1	d__Bacteria	p__Proteobacteria	c__Alphaproteobacteria	o__Rhizobiales	f__Rhizobiaceae	g__Rhizobium	s__Rhizobium sp900469475	3	0	0	0	0	0	0	0	3
RS_GCF_002797375.1	d__Bacteria	p__Firmicutes	c__Bacilli	o__Bacillales	f__Domibacillaceae	g__FJAT-46582	s__FJAT-46582 sp002797375	1	0	0	1	0	0	1	0	3
RS_GCF_002834385.1	d__Bacteria	p__Proteobacteria	c__Gammaproteobacteria	o__Enterobacterales	f__Enterobacteriaceae	g__Rahnella	s__Rahnella sp002834385	3	0	0	0	0	0	0	0	3
RS_GCF_001718195.1	d__Bacteria	p__Proteobacteria	c__Gammaproteobacteria	o__Burkholderiales	f__Burkholderiaceae	g__Paraburkholderia_B	s__Paraburkholderia_B nodosa_A	3	0	0	0	0	0	0	0	3
RS_GCF_001423405.1	d__Bacteria	p__Proteobacteria	c__Alphaproteobacteria	o__Rhizobiales	f__Beijerinckiaceae	g__Methylobacterium	s__Methylobacterium sp001423405	3	0	0	0	0	0	0	0	3
GB_GCA_001871085.1	d__Bacteria	p__Desulfobacterota_A	c__Desulfovibrionia	o__Desulfovibrionales	f__Desulfovibrionaceae	g__Desulfovibrio_P	s__Desulfovibrio_P sp001871085	1	0	0	0	0	0	2	0	3
RS_GCF_000961515.1	d__Bacteria	p__Proteobacteria	c__Gammaproteobacteria	o__Burkholderiales	f__Burkholderiaceae	g__Paraburkholderia	s__Paraburkholderia fungorum	3	0	0	0	0	0	0	0	3
RS_GCF_900112965.1	d__Bacteria	p__Actinobacteriota	c__Actinobacteria	o__Streptomycetales	f__Streptomycetaceae	g__Streptomyces	s__Streptomyces mirabilis_B	2	0	1	0	0	0	0	0	3
RS_GCF_002220365.1	d__Bacteria	p__Proteobacteria	c__Gammaproteobacteria	o__Burkholderiales	f__Burkholderiaceae	g__Caballeronia	s__Caballeronia sordidicola_C	3	0	0	0	0	0	0	0	3
RS_GCF_002556365.1	d__Bacteria	p__Firmicutes	c__Bacilli	o__Bacillales	f__Bacillaceae_G	g__Bacillus_AW	s__Bacillus_AW sp002556365	2	0	0	1	0	0	0	0	3
RS_GCF_000282275.2	d__Bacteria	p__Proteobacteria	c__Gammaproteobacteria	o__Pseudomonadales	f__Pseudomonadaceae	g__Pseudomonas_E	s__Pseudomonas_E sp000282275	3	0	0	0	0	0	0	0	3
RS_GCF_000821085.1	d__Bacteria	p__Firmicutes	c__Bacilli	o__Bacillales	f__Bacillaceae_A	g__Bacillus_D	s__Bacillus_D sp000821085	1	0	0	2	0	0	0	0	3
RS_GCF_000300295.4	d__Bacteria	p__Proteobacteria	c__Gammaproteobacteria	o__Piscirickettsiales	f__Piscirickettsiaceae	g__Piscirickettsia	s__Piscirickettsia salmonis	3	0	0	0	0	0	0	0	3
RS_GCF_002156005.1	d__Bacteria	p__Actinobacteriota	c__Actinobacteria	o__Mycobacteriales	f__Pseudonocardiaceae	g__Amycolatopsis	s__Amycolatopsis lexingtonensis	3	0	0	0	0	0	0	0	3
RS_GCF_002846355.1	d__Bacteria	p__Actinobacteriota	c__Actinobacteria	o__Streptomycetales	f__Streptomycetaceae	g__Kitasatospora	s__Kitasatospora sp002846355	3	0	0	0	0	0	0	0	3
RS_GCF_003116135.1	d__Bacteria	p__Proteobacteria	c__Alphaproteobacteria	o__Acetobacterales	f__Acetobacteraceae	g__Roseomonas	s__Roseomonas aestuarii	3	0	0	0	0	0	0	0	3
RS_GCF_000426545.1	d__Bacteria	p__Firmicutes_I	c__Bacilli_A	o__Paenibacillales	f__Paenibacillaceae	g__Paenibacillus	s__Paenibacillus panacisoli	1	0	0	2	0	0	0	0	3
RS_GCF_002208095.1	d__Bacteria	p__Proteobacteria	c__Gammaproteobacteria	o__Enterobacterales	f__Enterobacteriaceae	g__Enterobacter	s__Enterobacter cloacae_M	3	0	0	0	0	0	0	0	3
GB_GCA_000260135.1	d__Bacteria	p__Proteobacteria	c__Gammaproteobacteria	o__Thiotrichales	f__Thiotrichaceae	g__Thiothrix	s__Thiothrix nivea	3	0	0	0	0	0	0	0	3
RS_GCF_000369405.1	d__Bacteria	p__Proteobacteria	c__Gammaproteobacteria	o__Pseudomonadales	f__Moraxellaceae	g__Acinetobacter	s__Acinetobacter sp000369405	3	0	0	0	0	0	0	0	3
RS_GCF_003026495.1	d__Bacteria	p__Proteobacteria	c__Gammaproteobacteria	o__Enterobacterales	f__Vibrionaceae	g__Photobacterium	s__Photobacterium sanctipauli	3	0	0	0	0	0	0	0	3
RS_GCF_003057745.1	d__Bacteria	p__Proteobacteria	c__Gammaproteobacteria	o__Enterobacterales	f__Enterobacteriaceae	g__Enterobacter	s__Enterobacter sp003057745	3	0	0	0	0	0	0	0	3
RS_GCF_000588875.1	d__Bacteria	p__Proteobacteria	c__Alphaproteobacteria	o__Sphingomonadales	f__Sphingomonadaceae	g__Sphingobium	s__Sphingobium sp000588875	3	0	0	0	0	0	0	0	3
RS_GCF_900090235.1	d__Bacteria	p__Actinobacteriota	c__Actinobacteria	o__Mycobacteriales	f__Micromonosporaceae	g__Micromonospora	s__Micromonospora echinaurantiaca	2	0	1	0	0	0	0	0	3
GB_GCA_003134855.1	d__Bacteria	p__Acidobacteriota	c__Acidobacteriae	o__Acidobacteriales	f__Acidobacteriaceae	g__Terracidiphilus	s__Terracidiphilus sp003134855	2	0	0	0	0	0	1	0	3
RS_GCF_002002885.1	d__Bacteria	p__Proteobacteria	c__Gammaproteobacteria	o__Burkholderiales	f__Burkholderiaceae	g__Janthinobacterium	s__Janthinobacterium sp002002885	3	0	0	0	0	0	0	0	3
GB_GCA_003243885.1	d__Bacteria	p__Dormibacterota	c__Dormibacteria	o__Dormibacterales	f__Dormibacteraceae	g__QHBS01	s__QHBS01 sp003243885	3	0	0	0	0	0	0	0	3
RS_GCF_003201865.1	d__Bacteria	p__Proteobacteria	c__Alphaproteobacteria	o__Rhizobiales	f__Beijerinckiaceae	g__Methylobacterium	s__Methylobacterium sp003201865	3	0	0	0	0	0	0	0	3
RS_GCF_002135205.1	d__Bacteria	p__Proteobacteria	c__Gammaproteobacteria	o__Pseudomonadales	f__Moraxellaceae	g__Acinetobacter	s__Acinetobacter sp002135205	3	0	0	0	0	0	0	0	3
RS_GCF_000245055.1	d__Bacteria	p__Desulfobacterota_A	c__Desulfovibrionia	o__Desulfovibrionales	f__Desulfovibrionaceae	g__Desulfovibrio_F	s__Desulfovibrio_F sp000245055	2	0	0	0	0	0	1	0	3
RS_GCF_001399685.1	d__Bacteria	p__Firmicutes_I	c__Bacilli_A	o__Paenibacillales	f__Paenibacillaceae	g__Paenibacillus_G	s__Paenibacillus_G sp001399685	1	0	0	1	0	0	1	0	3
RS_GCF_002742685.1	d__Bacteria	p__Firmicutes	c__Bacilli	o__Bacillales	f__Anoxybacillaceae	g__Anoxybacillus	s__Anoxybacillus flavithermus_E	1	0	0	1	0	0	1	0	3
GB_GCA_002298805.1	d__Bacteria	p__Proteobacteria	c__Gammaproteobacteria	o__Enterobacterales	f__Enterobacteriaceae	g__Pseudescherichia	s__Pseudescherichia sp002298805	3	0	0	0	0	0	0	0	3
RS_GCF_001908275.1	d__Bacteria	p__Firmicutes_I	c__Bacilli_A	o__Paenibacillales	f__Paenibacillaceae	g__Paenibacillus	s__Paenibacillus xylanexedens	1	0	0	2	0	0	0	0	3
RS_GCF_000805455.1	d__Bacteria	p__Proteobacteria	c__Gammaproteobacteria	o__Pseudomonadales	f__Moraxellaceae	g__Acinetobacter	s__Acinetobacter sp000805455	3	0	0	0	0	0	0	0	3
RS_GCF_002095315.1	d__Bacteria	p__Proteobacteria	c__Gammaproteobacteria	o__Enterobacterales	f__Enterobacteriaceae	g__Pantoea	s__Pantoea conspicua	3	0	0	0	0	0	0	0	3
GB_GCA_003290225.1	d__Bacteria	p__Proteobacteria	c__Gammaproteobacteria	o__Pseudomonadales	f__Pseudomonadaceae	g__Pseudomonas_E	s__Pseudomonas_E sp003290225	3	0	0	0	0	0	0	0	3
RS_GCF_001605895.1	d__Bacteria	p__Proteobacteria	c__Gammaproteobacteria	o__Pseudomonadales	f__Moraxellaceae	g__Acinetobacter	s__Acinetobacter pragensis	3	0	0	0	0	0	0	0	3
RS_GCF_002895925.1	d__Bacteria	p__Proteobacteria	c__Gammaproteobacteria	o__Enterobacterales	f__Enterobacteriaceae	g__Pantoea_B	s__Pantoea_B theicola	3	0	0	0	0	0	0	0	3
RS_GCF_003130795.1	d__Bacteria	p__Proteobacteria	c__Alphaproteobacteria	o__Azospirillales	f__Azospirillaceae	g__Azospirillum	s__Azospirillum thiophilum_A	3	0	0	0	0	0	0	0	3
RS_GCF_000466385.1	d__Bacteria	p__Firmicutes_I	c__Bacilli_A	o__Aneurinibacillales	f__Aneurinibacillaceae	g__Aneurinibacillus	s__Aneurinibacillus aneurinilyticus	1	0	0	2	0	0	0	0	3
RS_GCF_003063355.1	d__Bacteria	p__Proteobacteria	c__Gammaproteobacteria	o__Burkholderiales	f__Burkholderiaceae	g__Limnohabitans	s__Limnohabitans sp003063355	2	0	0	0	0	0	1	0	3
RS_GCF_900112625.1	d__Bacteria	p__Proteobacteria	c__Alphaproteobacteria	o__Rhizobiales	f__Beijerinckiaceae	g__Methylobacterium	s__Methylobacterium sp900112625	3	0	0	0	0	0	0	0	3
RS_GCF_001515505.1	d__Bacteria	p__Proteobacteria	c__Gammaproteobacteria	o__Enterobacterales	f__Enterobacteriaceae	g__Leclercia	s__Leclercia adecarboxylata	3	0	0	0	0	0	0	0	3
RS_GCF_002217755.1	d__Bacteria	p__Actinobacteriota	c__Actinobacteria	o__Streptomycetales	f__Streptomycetaceae	g__Streptomyces	s__Streptomyces hyaluromycini	2	0	1	0	0	0	0	0	3
RS_GCF_000959245.1	d__Bacteria	p__Proteobacteria	c__Gammaproteobacteria	o__Burkholderiales	f__Burkholderiaceae	g__Burkholderia	s__Burkholderia ubonensis	3	0	0	0	0	0	0	0	3
RS_GCF_000695685.1	d__Bacteria	p__Proteobacteria	c__Gammaproteobacteria	o__Enterobacterales	f__Vibrionaceae	g__Vibrio	s__Vibrio fortis	3	0	0	0	0	0	0	0	3
RS_GCF_900187515.1	d__Bacteria	p__Proteobacteria	c__Gammaproteobacteria	o__Pseudomonadales	f__Pseudomonadaceae	g__Pseudomonas_E	s__Pseudomonas_E sp900187515	3	0	0	0	0	0	0	0	3
RS_GCF_000759475.1	d__Bacteria	p__Proteobacteria	c__Gammaproteobacteria	o__Enterobacterales	f__Enterobacteriaceae	g__Pantoea	s__Pantoea rwandensis_B	3	0	0	0	0	0	0	0	3
RS_GCF_002746455.1	d__Bacteria	p__Firmicutes	c__Bacilli	o__Bacillales	f__Bacillaceae_G	g__Bacillus_A	s__Bacillus_A sp002746455	2	0	0	1	0	0	0	0	3
RS_GCF_001598675.1	d__Bacteria	p__Proteobacteria	c__Gammaproteobacteria	o__Enterobacterales	f__Enterobacteriaceae	g__Serratia_B	s__Serratia_B rubidaea	3	0	0	0	0	0	0	0	3
RS_GCF_000220945.1	d__Bacteria	p__Actinobacteriota	c__Actinobacteria	o__Mycobacteriales	f__Pseudonocardiaceae	g__Amycolatopsis	s__Amycolatopsis mediterranei	3	0	0	0	0	0	0	0	3
RS_GCF_900111735.1	d__Bacteria	p__Proteobacteria	c__Gammaproteobacteria	o__Pseudomonadales	f__Pseudomonadaceae	g__Pseudomonas_E	s__Pseudomonas_E graminis	3	0	0	0	0	0	0	0	3
GB_GCA_001304695.1	d__Bacteria	p__Proteobacteria	c__Gammaproteobacteria	o__Xanthomonadales	f__Xanthomonadaceae	g__Xanthomonas	s__Xanthomonas axonopodis	3	0	0	0	0	0	0	0	3
RS_GCF_001696485.1	d__Bacteria	p__Actinobacteriota	c__Actinobacteria	o__Streptosporangiales	f__Streptosporangiaceae	g__Planobispora	s__Planobispora rosea	3	0	0	0	0	0	0	0	3
RS_GCF_001552135.1	d__Bacteria	p__Actinobacteriota	c__Actinobacteria	o__Streptosporangiales	f__Streptosporangiaceae	g__Spirillospora	s__Spirillospora chibensis	3	0	0	0	0	0	0	0	3
RS_GCF_000384295.1	d__Bacteria	p__Actinobacteriota	c__Actinobacteria	o__Mycobacteriales	f__Pseudonocardiaceae	g__Amycolatopsis	s__Amycolatopsis balhimycina	3	0	0	0	0	0	0	0	3
RS_GCF_000716715.1	d__Bacteria	p__Actinobacteriota	c__Actinobacteria	o__Mycobacteriales	f__Micromonosporaceae	g__Dactylosporangium	s__Dactylosporangium aurantiacum	3	0	0	0	0	0	0	0	3
RS_GCF_001956185.1	d__Bacteria	p__Firmicutes_I	c__Bacilli_A	o__Paenibacillales	f__Paenibacillaceae	g__Paenibacillus	s__Paenibacillus rhizosphaerae	1	0	0	2	0	0	0	0	3
GB_GCA_003269295.1	d__Bacteria	p__Actinobacteriota	c__Actinobacteria	o__Mycobacteriales	f__Pseudonocardiaceae	g__Lentzea	s__Lentzea atacamensis	2	0	1	0	0	0	0	0	3
RS_GCF_000698595.1	d__Bacteria	p__Proteobacteria	c__Gammaproteobacteria	o__Burkholderiales	f__Burkholderiaceae	g__Caballeronia	s__Caballeronia glathei	3	0	0	0	0	0	0	0	3
RS_GCF_000828055.2	d__Bacteria	p__Proteobacteria	c__Gammaproteobacteria	o__Enterobacterales	f__Enterobacteriaceae	g__Klebsiella	s__Klebsiella variicola	3	0	0	0	0	0	0	0	3
GB_GCA_003527485.1	d__Bacteria	p__Spirochaetota	c__Spirochaetia	o__Treponematales	f__Treponemataceae_B	g__UBA12037	s__UBA12037 sp003527485	1	0	0	0	0	0	0	2	3
RS_GCF_002887735.1	d__Bacteria	p__Proteobacteria	c__Gammaproteobacteria	o__Xanthomonadales	f__Xanthomonadaceae	g__Stenotrophomonas	s__Stenotrophomonas bentonitica	3	0	0	0	0	0	0	0	3
RS_GCF_003053805.1	d__Bacteria	p__Proteobacteria	c__Gammaproteobacteria	o__Pseudomonadales	f__Pseudomonadaceae	g__Pseudomonas_E	s__Pseudomonas_E sp003053805	3	0	0	0	0	0	0	0	3
RS_GCF_001426865.1	d__Bacteria	p__Firmicutes_I	c__Bacilli_A	o__Paenibacillales	f__Paenibacillaceae	g__Paenibacillus	s__Paenibacillus sp001426865	1	0	0	2	0	0	0	0	3
RS_GCF_900100395.1	d__Bacteria	p__Actinobacteriota	c__Actinobacteria	o__Streptosporangiales	f__Streptosporangiaceae	g__Nonomuraea	s__Nonomuraea maritima	2	0	1	0	0	0	0	0	3
RS_GCF_002563635.1	d__Bacteria	p__Firmicutes	c__Bacilli	o__Bacillales	f__Anaerobacillaceae_A	g__Anaerobacillus_A	s__Anaerobacillus_A sp002563635	1	0	0	2	0	0	0	0	3
GB_GCA_002480085.1	d__Bacteria	p__Proteobacteria	c__Gammaproteobacteria	o__Enterobacterales	f__Enterobacteriaceae	g__Pseudescherichia	s__Pseudescherichia sp002480085	3	0	0	0	0	0	0	0	3
RS_GCF_001563285.1	d__Bacteria	p__Proteobacteria	c__Alphaproteobacteria	o__Sphingomonadales	f__Sphingomonadaceae	g__Sphingobium	s__Sphingobium sp001563285	3	0	0	0	0	0	0	0	3
RS_GCF_003025595.1	d__Bacteria	p__Proteobacteria	c__Gammaproteobacteria	o__Enterobacterales	f__Vibrionaceae	g__Photobacterium	s__Photobacterium ganghwense	3	0	0	0	0	0	0	0	3
RS_GCF_000196795.1	d__Bacteria	p__Proteobacteria	c__Gammaproteobacteria	o__Pseudomonadales	f__Moraxellaceae	g__Acinetobacter	s__Acinetobacter oleivorans	3	0	0	0	0	0	0	0	3
RS_GCF_000717595.1	d__Bacteria	p__Actinobacteriota	c__Actinobacteria	o__Streptomycetales	f__Streptomycetaceae	g__Streptomyces	s__Streptomyces flavochromogenes	2	0	1	0	0	0	0	0	3
GB_GCA_001899585.1	d__Bacteria	p__Proteobacteria	c__Alphaproteobacteria	o__Acetobacterales	f__Acetobacteraceae	g__70-18	s__70-18 sp001899585	3	0	0	0	0	0	0	0	3
RS_GCF_001612805.1	d__Bacteria	p__Actinobacteriota	c__Actinobacteria	o__Mycobacteriales	f__Mycobacteriaceae	g__Nocardia	s__Nocardia coubleae	2	0	1	0	0	0	0	0	3
RS_GCF_900103195.1	d__Bacteria	p__Proteobacteria	c__Alphaproteobacteria	o__Rhizobiales	f__Beijerinckiaceae	g__Methylobacterium	s__Methylobacterium sp900103195	3	0	0	0	0	0	0	0	3
RS_GCF_001558415.2	d__Bacteria	p__Proteobacteria	c__Gammaproteobacteria	o__Enterobacterales	f__Vibrionaceae	g__Vibrio	s__Vibrio fluvialis	3	0	0	0	0	0	0	0	3
RS_GCF_000219535.2	d__Bacteria	p__Firmicutes_I	c__Bacilli_A	o__Brevibacillales	f__Brevibacillaceae	g__Brevibacillus_B	s__Brevibacillus_B laterosporus_C	1	0	0	2	0	0	0	0	3
RS_GCF_000620785.1	d__Bacteria	p__Actinobacteriota	c__Actinobacteria	o__Mycobacteriales	f__Pseudonocardiaceae	g__Pseudonocardia	s__Pseudonocardia acaciae	1	0	2	0	0	0	0	0	3
GB_GCA_002435955.1	d__Bacteria	p__Desulfuromonadota	c__Desulfuromonadia	o__Desulfuromonadales	f__Pelobacteraceae_A	g__Pelobacter_A	s__Pelobacter_A sp002435955	1	0	1	0	0	0	1	0	3
RS_GCF_002934685.1	d__Bacteria	p__Proteobacteria	c__Gammaproteobacteria	o__Pseudomonadales	f__Pseudomonadaceae	g__Pseudomonas_E	s__Pseudomonas_E bohemica	3	0	0	0	0	0	0	0	3
RS_GCF_000568095.1	d__Bacteria	p__Proteobacteria	c__Gammaproteobacteria	o__Enterobacterales	f__Enterobacteriaceae	g__Enterobacter	s__Enterobacter sp000568095	3	0	0	0	0	0	0	0	3
RS_GCF_000981225.1	d__Bacteria	p__Actinobacteriota	c__Actinobacteria	o__Streptosporangiales	f__Streptosporangiaceae	g__Allosalinactinospora	s__Allosalinactinospora lopnorensis	2	0	1	0	0	0	0	0	3
RS_GCF_002135195.1	d__Bacteria	p__Proteobacteria	c__Gammaproteobacteria	o__Pseudomonadales	f__Moraxellaceae	g__Acinetobacter	s__Acinetobacter sp002135195	3	0	0	0	0	0	0	0	3
RS_GCF_003259225.1	d__Bacteria	p__Proteobacteria	c__Gammaproteobacteria	o__Pseudomonadales	f__Marinomonadaceae	g__Marinomonas	s__Marinomonas arctica	3	0	0	0	0	0	0	0	3
RS_GCF_900129425.1	d__Bacteria	p__Proteobacteria	c__Alphaproteobacteria	o__Rhizobiales	f__Xanthobacteraceae	g__Bradyrhizobium	s__Bradyrhizobium erythrophlei_C	3	0	0	0	0	0	0	0	3
RS_GCF_003194385.1	d__Bacteria	p__Proteobacteria	c__Gammaproteobacteria	o__Pseudomonadales	f__Nitrincolaceae	g__Balneatrix	s__Balneatrix sp003194385	3	0	0	0	0	0	0	0	3
RS_GCF_002920175.1	d__Bacteria	p__Proteobacteria	c__Gammaproteobacteria	o__Enterobacterales	f__Enterobacteriaceae	g__Pantoea	s__Pantoea sp002920175	3	0	0	0	0	0	0	0	3
RS_GCF_002088275.1	d__Bacteria	p__Proteobacteria	c__Alphaproteobacteria	o__Rhizobiales	f__Rhizobiaceae	g__Fulvimarina	s__Fulvimarina sp002088275	3	0	0	0	0	0	0	0	3
RS_GCF_900129625.1	d__Bacteria	p__Proteobacteria	c__Gammaproteobacteria	o__Enterobacterales	f__Enterobacteriaceae	g__Enterobacter	s__Enterobacter sesami	3	0	0	0	0	0	0	0	3
GB_GCA_003142035.1	d__Bacteria	p__Dormibacterota	c__Dormibacteria	o__UBA8260	f__UBA8260	g__UBA8260	s__UBA8260 sp003142035	1	0	0	0	0	0	0	2	3
GB_GCA_001189845.1	d__Bacteria	p__Proteobacteria	c__Alphaproteobacteria	o__Rhizobiales	f__Xanthobacteraceae	g__Bradyrhizobium	s__Bradyrhizobium tropiciagri	3	0	0	0	0	0	0	0	3
RS_GCF_001729765.1	d__Bacteria	p__Proteobacteria	c__Gammaproteobacteria	o__Enterobacterales	f__Enterobacteriaceae	g__Enterobacter	s__Enterobacter kobei	3	0	0	0	0	0	0	0	3
RS_GCF_000176175.1	d__Bacteria	p__Proteobacteria	c__Gammaproteobacteria	o__Enterobacterales	f__Vibrionaceae	g__Vibrio	s__Vibrio furnissii	3	0	0	0	0	0	0	0	3
RS_GCF_000369545.1	d__Bacteria	p__Proteobacteria	c__Gammaproteobacteria	o__Pseudomonadales	f__Moraxellaceae	g__Acinetobacter	s__Acinetobacter sp000369545	3	0	0	0	0	0	0	0	3
GB_GCA_001989995.1	d__Bacteria	p__Proteobacteria	c__Gammaproteobacteria	o__Enterobacterales	f__Vibrionaceae	g__Vibrio	s__Vibrio anguillarum	3	0	0	0	0	0	0	0	3
RS_GCF_000770305.1	d__Bacteria	p__Proteobacteria	c__Gammaproteobacteria	o__Enterobacterales	f__Enterobacteriaceae	g__Erwinia	s__Erwinia oleae	3	0	0	0	0	0	0	0	3
GB_GCA_002345315.1	d__Bacteria	p__Proteobacteria	c__Gammaproteobacteria	o__Enterobacterales	f__Enterobacteriaceae	g__Atlantibacter	s__Atlantibacter sp002345315	3	0	0	0	0	0	0	0	3
RS_GCF_003184185.1	d__Bacteria	p__Proteobacteria	c__Gammaproteobacteria	o__Legionellales	f__Legionellaceae	g__Legionella	s__Legionella sp003184185	3	0	0	0	0	0	0	0	3
RS_GCF_003236295.1	d__Bacteria	p__Actinobacteriota	c__Actinobacteria	o__Jiangellales	f__Jiangellaceae	g__Jiangella	s__Jiangella sp003236295	3	0	0	0	0	0	0	0	3
RS_GCF_000478275.1	d__Bacteria	p__Actinobacteriota	c__Actinobacteria	o__Mycobacteriales	f__Pseudonocardiaceae	g__Amycolatopsis	s__Amycolatopsis orientalis	3	0	0	0	0	0	0	0	3
RS_GCF_900289175.1	d__Bacteria	p__Firmicutes_I	c__Bacilli_A	o__Paenibacillales	f__Paenibacillaceae	g__Paenibacillus	s__Paenibacillus sp900289175	1	0	0	2	0	0	0	0	3
RS_GCF_000949135.1	d__Bacteria	p__Proteobacteria	c__Gammaproteobacteria	o__Burkholderiales	f__Burkholderiaceae	g__Burkholderia	s__Burkholderia sp000949135	3	0	0	0	0	0	0	0	3
GB_GCA_003139795.1	d__Bacteria	p__Acidobacteriota	c__Acidobacteriae	o__Acidobacteriales	f__Acidobacteriaceae	g__Terracidiphilus	s__Terracidiphilus sp003139795	1	0	0	0	0	0	2	0	3
RS_GCF_002095535.1	d__Bacteria	p__Proteobacteria	c__Gammaproteobacteria	o__Enterobacterales	f__Enterobacteriaceae	g__Pantoea	s__Pantoea cypripedii	3	0	0	0	0	0	0	0	3
RS_GCF_900114475.1	d__Bacteria	p__Firmicutes_I	c__Bacilli_A	o__Paenibacillales	f__Paenibacillaceae	g__Paenibacillus_S	s__Paenibacillus_S sp900114475	1	0	0	2	0	0	0	0	3
RS_GCF_001718535.1	d__Bacteria	p__Proteobacteria	c__Gammaproteobacteria	o__Burkholderiales	f__Burkholderiaceae	g__Burkholderia	s__Burkholderia seminalis	3	0	0	0	0	0	0	0	3
RS_GCF_002018575.1	d__Bacteria	p__Proteobacteria	c__Gammaproteobacteria	o__Xanthomonadales	f__Xanthomonadaceae	g__Xanthomonas	s__Xanthomonas citri	3	0	0	0	0	0	0	0	3
RS_GCF_000428945.1	d__Bacteria	p__Actinobacteriota	c__Actinobacteria	o__Mycobacteriales	f__Micromonosporaceae	g__Hamadaea	s__Hamadaea tsunoensis	3	0	0	0	0	0	0	0	3
RS_GCF_000017285.1	d__Bacteria	p__Proteobacteria	c__Gammaproteobacteria	o__Pseudomonadales	f__Marinomonadaceae	g__Marinomonas	s__Marinomonas sp000017285	3	0	0	0	0	0	0	0	3
RS_GCF_001375555.1	d__Bacteria	p__Firmicutes_I	c__Bacilli_A	o__Thermoactinomycetales	f__Novibacillaceae	g__Numidum	s__Numidum massiliense	1	0	0	1	0	0	1	0	3
RS_GCF_000467125.1	d__Bacteria	p__Proteobacteria	c__Gammaproteobacteria	o__Enterobacterales	f__Vibrionaceae	g__Vibrio	s__Vibrio proteolyticus	3	0	0	0	0	0	0	0	3
RS_GCF_000014965.1	d__Bacteria	p__Desulfobacterota	c__Syntrophobacteria	o__Syntrophobacterales	f__Syntrophobacteraceae	g__Syntrophobacter	s__Syntrophobacter fumaroxidans	3	0	0	0	0	0	0	0	3
RS_GCF_002874535.1	d__Bacteria	p__Firmicutes	c__Bacilli	o__Bacillales	f__Bacillaceae_A	g__Bacillus_Y	s__Bacillus_Y jeotgali	1	0	0	2	0	0	0	0	3
RS_GCF_000290855.1	d__Bacteria	p__Firmicutes	c__Bacilli	o__Bacillales	f__Bacillaceae_G	g__Bacillus_A	s__Bacillus_A cereus_Q	2	0	0	1	0	0	0	0	3
GB_GCA_002358165.1	d__Bacteria	p__Proteobacteria	c__Gammaproteobacteria	o__Enterobacterales	f__Enterobacteriaceae	g__Atlantibacter	s__Atlantibacter sp002358165	3	0	0	0	0	0	0	0	3
RS_GCF_000687455.2	d__Bacteria	p__Proteobacteria	c__Gammaproteobacteria	o__Burkholderiales	f__Burkholderiaceae	g__Burkholderia	s__Burkholderia sp000687455	3	0	0	0	0	0	0	0	3
RS_GCF_002814235.1	d__Bacteria	p__Proteobacteria	c__Gammaproteobacteria	o__Pseudomonadales	f__Pseudomonadaceae	g__Pseudomonas_E	s__Pseudomonas_E sp002814235	3	0	0	0	0	0	0	0	3
RS_GCF_000018625.1	d__Bacteria	p__Proteobacteria	c__Gammaproteobacteria	o__Enterobacterales	f__Enterobacteriaceae	g__Salmonella	s__Salmonella enterica_E	3	0	0	0	0	0	0	0	3
RS_GCF_900188345.1	d__Bacteria	p__Actinobacteriota	c__Actinobacteria	o__Streptosporangiales	f__Streptosporangiaceae	g__Streptosporangium	s__Streptosporangium subroseum	2	0	1	0	0	0	0	0	3
RS_GCF_000621645.1	d__Bacteria	p__Proteobacteria	c__Gammaproteobacteria	o__Enterobacterales	f__Vibrionaceae	g__Vibrio	s__Vibrio cholerae	3	0	0	0	0	0	0	0	3
RS_GCF_001280565.1	d__Bacteria	p__Firmicutes_E	c__Sulfobacillia	o__Sulfobacillales	f__Sulfobacillaceae	g__Sulfobacillus	s__Sulfobacillus thermosulfidooxidans_A	3	0	0	0	0	0	0	0	3
RS_GCF_900116445.1	d__Bacteria	p__Proteobacteria	c__Gammaproteobacteria	o__Burkholderiales	f__Burkholderiaceae	g__Paraburkholderia	s__Paraburkholderia aspalathi	3	0	0	0	0	0	0	0	3
RS_GCF_000526455.1	d__Bacteria	p__Desulfobacterota_A	c__Desulfovibrionia	o__Desulfovibrionales	f__Desulfovibrionaceae	g__Desulfovibrio_F	s__Desulfovibrio_F magneticus_C	2	0	0	0	0	0	1	0	3
RS_GCF_001570585.1	d__Bacteria	p__Actinobacteriota	c__Actinobacteria	o__Streptosporangiales	f__Streptosporangiaceae	g__Herbidospora	s__Herbidospora daliensis	3	0	0	0	0	0	0	0	3
RS_GCF_001644015.1	d__Bacteria	p__Proteobacteria	c__Gammaproteobacteria	o__Methylococcales	f__Methylomonadaceae	g__Methylomonas	s__Methylomonas lenta	2	0	0	0	0	0	1	0	3
RS_GCF_900109515.1	d__Bacteria	p__Firmicutes_I	c__Bacilli_A	o__Paenibacillales	f__Paenibacillaceae	g__Paenibacillus	s__Paenibacillus sp900109515	1	0	0	2	0	0	0	0	3
RS_GCF_900114385.1	d__Bacteria	p__Actinobacteriota	c__Actinobacteria	o__Mycobacteriales	f__Geodermatophilaceae	g__Geodermatophilus	s__Geodermatophilus ruber	1	0	2	0	0	0	0	0	3
RS_GCF_003002095.1	d__Bacteria	p__Actinobacteriota	c__Actinobacteria	o__Streptosporangiales	f__Streptosporangiaceae	g__Allonocardiopsis	s__Allonocardiopsis opalescens	3	0	0	0	0	0	0	0	3
RS_GCF_001931675.1	d__Bacteria	p__Proteobacteria	c__Gammaproteobacteria	o__Burkholderiales	f__Burkholderiaceae	g__Pandoraea	s__Pandoraea thiooxydans	3	0	0	0	0	0	0	0	3
RS_GCF_900100275.1	d__Bacteria	p__Actinobacteriota	c__Actinobacteria	o__Mycobacteriales	f__Pseudonocardiaceae	g__Lentzea	s__Lentzea violacea	2	0	1	0	0	0	0	0	3
RS_GCF_900060185.1	d__Bacteria	p__Proteobacteria	c__Gammaproteobacteria	o__Enterobacterales	f__Vibrionaceae	g__Grimontia	s__Grimontia marina	3	0	0	0	0	0	0	0	3
RS_GCF_900091475.1	d__Bacteria	p__Actinobacteriota	c__Actinobacteria	o__Mycobacteriales	f__Micromonosporaceae	g__Micromonospora	s__Micromonospora chersina	2	0	1	0	0	0	0	0	3
RS_GCF_002042885.1	d__Bacteria	p__Proteobacteria	c__Gammaproteobacteria	o__Enterobacterales	f__Enterobacteriaceae	g__Citrobacter	s__Citrobacter portucalensis	3	0	0	0	0	0	0	0	3
RS_GCF_000482445.1	d__Bacteria	p__Proteobacteria	c__Gammaproteobacteria	o__Xanthomonadales	f__Xanthomonadaceae	g__Xanthomonas	s__Xanthomonas oryzae	3	0	0	0	0	0	0	0	3
RS_GCF_001277175.1	d__Bacteria	p__Proteobacteria	c__Gammaproteobacteria	o__Enterobacterales	f__Enterobacteriaceae	g__Cronobacter	s__Cronobacter universalis	3	0	0	0	0	0	0	0	3
RS_GCF_900108875.1	d__Bacteria	p__Proteobacteria	c__Gammaproteobacteria	o__Pseudomonadales	f__Pseudomonadaceae	g__Pseudomonas_E	s__Pseudomonas_E sp900108875	3	0	0	0	0	0	0	0	3
RS_GCF_001083785.1	d__Bacteria	p__Actinobacteriota	c__Actinobacteria	o__Streptosporangiales	f__Streptosporangiaceae	g__Nonomuraea	s__Nonomuraea sp001083785	3	0	0	0	0	0	0	0	3
GB_GCA_002281855.1	d__Bacteria	p__Proteobacteria	c__Alphaproteobacteria	o__Reyranellales	f__Reyranellaceae	g__Reyranella	s__Reyranella sp002281855	2	0	0	0	0	0	1	0	3
RS_GCF_000685095.1	d__Bacteria	p__Proteobacteria	c__Gammaproteobacteria	o__Burkholderiales	f__Burkholderiaceae	g__Paraburkholderia	s__Paraburkholderia caledonica	3	0	0	0	0	0	0	0	3
RS_GCF_900188485.1	d__Bacteria	p__Actinobacteriota	c__Actinobacteria	o__Mycobacteriales	f__Micromonosporaceae	g__Asanoa	s__Asanoa hainanensis	2	0	1	0	0	0	0	0	3
RS_GCF_000934845.1	d__Bacteria	p__Firmicutes	c__Bacilli	o__Bacillales	f__Bacillaceae_A	g__Bacillus_Y	s__Bacillus_Y subterraneus	1	0	0	1	0	0	1	0	3
RS_GCF_001718835.1	d__Bacteria	p__Proteobacteria	c__Gammaproteobacteria	o__Burkholderiales	f__Burkholderiaceae	g__Burkholderia	s__Burkholderia cepacia_F	3	0	0	0	0	0	0	0	3
RS_GCF_900099985.1	d__Bacteria	p__Actinobacteriota	c__Actinobacteria	o__Streptosporangiales	f__Streptosporangiaceae	g__Thermomonospora_B	s__Thermomonospora_B chromogena	3	0	0	0	0	0	0	0	3
RS_GCF_000299035.1	d__Bacteria	p__Firmicutes	c__Bacilli	o__Bacillales	f__Bacillaceae_G	g__Bacillus_A	s__Bacillus_A bingmayongensis	2	0	0	1	0	0	0	0	3
RS_GCF_001757995.1	d__Bacteria	p__Firmicutes	c__Bacilli	o__Bacillales	f__Bacillaceae_G	g__Bacillus_A	s__Bacillus_A mycoides_B	2	0	0	1	0	0	0	0	3
RS_GCF_000963515.1	d__Bacteria	p__Actinobacteriota	c__Actinobacteria	o__Streptomycetales	f__Streptomycetaceae	g__Streptomyces	s__Streptomyces albulus_B	3	0	0	0	0	0	0	0	3
RS_GCF_001280595.1	d__Bacteria	p__Firmicutes_I	c__Bacilli_A	o__Paenibacillales	f__Paenibacillaceae	g__Paenibacillus	s__Paenibacillus sp001280595	1	0	0	2	0	0	0	0	3
RS_GCF_002135245.1	d__Bacteria	p__Proteobacteria	c__Gammaproteobacteria	o__Pseudomonadales	f__Moraxellaceae	g__Acinetobacter	s__Acinetobacter sp002135245	3	0	0	0	0	0	0	0	3
RS_GCF_003207895.1	d__Bacteria	p__Proteobacteria	c__Alphaproteobacteria	o__Acetobacterales	f__Acetobacteraceae	g__Komagataeibacter	s__Komagataeibacter swingsii	3	0	0	0	0	0	0	0	3
RS_GCF_003258595.1	d__Bacteria	p__Proteobacteria	c__Alphaproteobacteria	o__Rhizobiales	f__Amorphaceae	g__Acuticoccus	s__Acuticoccus sp003258595	3	0	0	0	0	0	0	0	3
GB_GCA_003242605.1	d__Bacteria	p__Actinobacteriota	c__Actinobacteria	o__Streptosporangiales	f__Streptosporangiaceae	g__ZC4RG28	s__ZC4RG28 sp003242605	3	0	0	0	0	0	0	0	3
RS_GCF_001514495.1	d__Bacteria	p__Firmicutes_I	c__Bacilli_A	o__Paenibacillales	f__Paenibacillaceae	g__Paenibacillus	s__Paenibacillus pabuli	1	0	0	2	0	0	0	0	3
RS_GCF_001940525.2	d__Bacteria	p__Proteobacteria	c__Alphaproteobacteria	o__Rhodobacterales	f__Rhodobacteraceae	g__Thioclava	s__Thioclava nitratireducens	3	0	0	0	0	0	0	0	3
RS_GCF_001443625.1	d__Bacteria	p__Actinobacteriota	c__Actinobacteria	o__Streptomycetales	f__Streptomycetaceae	g__Streptomyces	s__Streptomyces venezuelae_A	2	0	1	0	0	0	0	0	3
RS_GCF_000378185.1	d__Bacteria	p__Proteobacteria	c__Gammaproteobacteria	o__Enterobacterales	f__Alteromonadaceae	g__Salinimonas	s__Salinimonas chungwhensis	3	0	0	0	0	0	0	0	3
RS_GCF_003049665.1	d__Bacteria	p__Firmicutes	c__Bacilli	o__Bacillales_A	f__Planococcaceae	g__Lysinibacillus	s__Lysinibacillus mangiferihumi	0	0	0	2	0	0	1	0	3
RS_GCF_900177725.1	d__Bacteria	p__Proteobacteria	c__Gammaproteobacteria	o__Burkholderiales	f__Burkholderiaceae	g__Paraburkholderia	s__Paraburkholderia susongensis	3	0	0	0	0	0	0	0	3
RS_GCF_900114905.1	d__Bacteria	p__Actinobacteriota	c__Actinobacteria	o__Mycobacteriales	f__Pseudonocardiaceae	g__Saccharopolyspora	s__Saccharopolyspora antimicrobica	2	0	1	0	0	0	0	0	3
RS_GCF_000272225.2	d__Bacteria	p__Proteobacteria	c__Gammaproteobacteria	o__Enterobacterales	f__Vibrionaceae	g__Vibrio	s__Vibrio splendidus_D	3	0	0	0	0	0	0	0	3
RS_GCF_002003685.1	d__Bacteria	p__Proteobacteria	c__Gammaproteobacteria	o__Enterobacterales	f__Enterobacteriaceae	g__Enterobacter	s__Enterobacter himalayensis	3	0	0	0	0	0	0	0	3
GB_GCA_002321695.1	d__Bacteria	p__Proteobacteria	c__Gammaproteobacteria	o__Enterobacterales	f__Enterobacteriaceae	g__Buttiauxella	s__Buttiauxella sp002321695	3	0	0	0	0	0	0	0	3
RS_GCF_001418135.1	d__Bacteria	p__Actinobacteriota	c__Actinobacteria	o__Streptomycetales	f__Streptomycetaceae	g__Streptomyces	s__Streptomyces aureus_A	2	0	1	0	0	0	0	0	3
RS_GCF_000178855.1	d__Bacteria	p__Chloroflexota	c__Ktedonobacteria	o__Ktedonobacterales	f__Ktedonobacteraceae	g__Ktedonobacter	s__Ktedonobacter racemifer	2	0	1	0	0	0	0	0	3
RS_GCF_002161865.1	d__Bacteria	p__Firmicutes_I	c__Bacilli_A	o__Paenibacillales	f__Paenibacillaceae	g__Paenibacillus_B	s__Paenibacillus_B apiarius	2	0	0	1	0	0	0	0	3
RS_GCF_002966515.1	d__Bacteria	p__Proteobacteria	c__Gammaproteobacteria	o__Enterobacterales	f__Shewanellaceae	g__Shewanella	s__Shewanella sp002966515	3	0	0	0	0	0	0	0	3
RS_GCF_003217495.1	d__Bacteria	p__Firmicutes_I	c__Bacilli_A	o__Paenibacillales	f__Paenibacillaceae	g__Paenibacillus	s__Paenibacillus barcinonensis	1	0	0	2	0	0	0	0	3
RS_GCF_002101735.1	d__Bacteria	p__Actinobacteriota	c__Actinobacteria	o__Mycobacteriales	f__Mycobacteriaceae	g__Mycobacterium	s__Mycobacterium kyorinense	2	0	1	0	0	0	0	0	3
RS_GCF_900111005.1	d__Bacteria	p__Actinobacteriota	c__Actinobacteria	o__Mycobacteriales	f__Pseudonocardiaceae	g__Lentzea	s__Lentzea albida	2	0	1	0	0	0	0	0	3
RS_GCF_001659845.1	d__Bacteria	p__Firmicutes_I	c__Bacilli_A	o__Paenibacillales	f__Paenibacillaceae	g__Paenibacillus	s__Paenibacillus sp001659845	1	0	0	2	0	0	0	0	3
RS_GCF_001654855.1	d__Bacteria	p__Proteobacteria	c__Gammaproteobacteria	o__Enterobacterales	f__Enterobacteriaceae	g__Proteus	s__Proteus myxofaciens	3	0	0	0	0	0	0	0	3
RS_GCF_000020045.1	d__Bacteria	p__Proteobacteria	c__Gammaproteobacteria	o__Burkholderiales	f__Burkholderiaceae	g__Paraburkholderia_A	s__Paraburkholderia_A phymatum	3	0	0	0	0	0	0	0	3
RS_GCF_000422445.1	d__Bacteria	p__Firmicutes_I	c__Bacilli_A	o__Paenibacillales	f__Paenibacillaceae	g__Paenibacillus_B	s__Paenibacillus_B assamensis	1	0	0	2	0	0	0	0	3
RS_GCF_002846205.1	d__Bacteria	p__Proteobacteria	c__Gammaproteobacteria	o__Xanthomonadales	f__Xanthomonadaceae	g__Xanthomonas	s__Xanthomonas prunicola	3	0	0	0	0	0	0	0	3
RS_GCF_001048675.1	d__Bacteria	p__Proteobacteria	c__Gammaproteobacteria	o__Enterobacterales	f__Vibrionaceae	g__Vibrio	s__Vibrio diabolicus	3	0	0	0	0	0	0	0	3
RS_GCF_001620265.1	d__Bacteria	p__Proteobacteria	c__Alphaproteobacteria	o__Rhodobacterales	f__Rhodobacteraceae	g__Defluviimonas_B	s__Defluviimonas_B alba	3	0	0	0	0	0	0	0	3
GB_GCA_000757405.1	d__Bacteria	p__Proteobacteria	c__Gammaproteobacteria	o__Enterobacterales	f__Enterobacteriaceae	g__Pantoea	s__Pantoea stewartii	3	0	0	0	0	0	0	0	3
RS_GCF_001274715.1	d__Bacteria	p__Firmicutes_I	c__Bacilli_A	o__Aneurinibacillales	f__Aneurinibacillaceae	g__Aneurinibacillus	s__Aneurinibacillus migulanus	1	0	0	2	0	0	0	0	3
RS_GCF_001628715.1	d__Bacteria	p__Proteobacteria	c__Alphaproteobacteria	o__Acetobacterales	f__Acetobacteraceae	g__Acetobacter	s__Acetobacter oryzifermentans	3	0	0	0	0	0	0	0	3
RS_GCF_000473045.1	d__Bacteria	p__Proteobacteria	c__Alphaproteobacteria	o__Rhizobiales	f__Xanthobacteraceae	g__Bradyrhizobium	s__Bradyrhizobium sp000473045	3	0	0	0	0	0	0	0	3
RS_GCF_900141775.1	d__Bacteria	p__Proteobacteria	c__Gammaproteobacteria	o__Enterobacterales	f__Vibrionaceae	g__Salinivibrio	s__Salinivibrio sp900141775	3	0	0	0	0	0	0	0	3
RS_GCF_003024485.1	d__Bacteria	p__Proteobacteria	c__Gammaproteobacteria	o__Enterobacterales	f__Enterobacteriaceae	g__Leclercia	s__Leclercia sp003024485	3	0	0	0	0	0	0	0	3
RS_GCF_900114035.1	d__Bacteria	p__Actinobacteriota	c__Actinobacteria	o__Mycobacteriales	f__Pseudonocardiaceae	g__Amycolatopsis	s__Amycolatopsis sacchari	2	0	1	0	0	0	0	0	3
RS_GCF_000688095.1	d__Bacteria	p__Actinobacteriota	c__Thermoleophilia	o__Solirubrobacterales	f__Solirubrobacteraceae	g__Conexibacter_A	s__Conexibacter_A sp000688095	1	0	2	0	0	0	0	0	3
RS_GCF_001543895.1	d__Bacteria	p__Actinobacteriota	c__Actinobacteria	o__Streptomycetales	f__Streptomycetaceae_A	g__Streptomyces_F	s__Streptomyces_F thermoautotrophicus	1	0	2	0	0	0	0	0	3
RS_GCF_000934605.2	d__Bacteria	p__Proteobacteria	c__Gammaproteobacteria	o__Burkholderiales	f__Burkholderiaceae	g__Pandoraea	s__Pandoraea vervacti	3	0	0	0	0	0	0	0	3
GB_GCA_000237975.1	d__Bacteria	p__Firmicutes_E	c__Sulfobacillia	o__Sulfobacillales	f__Sulfobacillaceae	g__Sulfobacillus_A	s__Sulfobacillus_A acidophilus	3	0	0	0	0	0	0	0	3
RS_GCF_001423585.1	d__Bacteria	p__Proteobacteria	c__Gammaproteobacteria	o__Xanthomonadales	f__Xanthomonadaceae	g__Xanthomonas	s__Xanthomonas sp001423585	3	0	0	0	0	0	0	0	3
RS_GCF_000364445.1	d__Bacteria	p__Proteobacteria	c__Alphaproteobacteria	o__Rhizobiales	f__Beijerinckiaceae	g__Methylobacterium	s__Methylobacterium mesophilicum	3	0	0	0	0	0	0	0	3
RS_GCF_001277235.1	d__Bacteria	p__Proteobacteria	c__Gammaproteobacteria	o__Enterobacterales	f__Enterobacteriaceae	g__Cronobacter	s__Cronobacter dublinensis	3	0	0	0	0	0	0	0	3
RS_GCF_002902925.1	d__Bacteria	p__Proteobacteria	c__Gammaproteobacteria	o__Burkholderiales	f__Burkholderiaceae	g__Paraburkholderia_A	s__Paraburkholderia_A terrae	3	0	0	0	0	0	0	0	3
RS_GCF_000472945.1	d__Bacteria	p__Proteobacteria	c__Alphaproteobacteria	o__Rhizobiales	f__Xanthobacteraceae	g__Bradyrhizobium	s__Bradyrhizobium japonicum_D	3	0	0	0	0	0	0	0	3
RS_GCF_001558935.2	d__Bacteria	p__Proteobacteria	c__Gammaproteobacteria	o__Enterobacterales	f__Enterobacteriaceae	g__Citrobacter_A	s__Citrobacter_A amalonaticus_D	3	0	0	0	0	0	0	0	3
RS_GCF_000712975.1	d__Bacteria	p__Proteobacteria	c__Gammaproteobacteria	o__Pseudomonadales	f__Halomonadaceae	g__Halomonas	s__Halomonas alkaliantarctica	3	0	0	0	0	0	0	0	3
RS_GCF_001277215.2	d__Bacteria	p__Proteobacteria	c__Gammaproteobacteria	o__Enterobacterales	f__Enterobacteriaceae	g__Cronobacter	s__Cronobacter malonaticus	3	0	0	0	0	0	0	0	3
RS_GCF_900107455.1	d__Bacteria	p__Actinobacteriota	c__Actinobacteria	o__Mycobacteriales	f__Micromonosporaceae	g__Asanoa	s__Asanoa ishikariensis	2	0	1	0	0	0	0	0	3
RS_GCF_900101625.1	d__Bacteria	p__Proteobacteria	c__Gammaproteobacteria	o__Burkholderiales	f__Burkholderiaceae	g__Cupriavidus	s__Cupriavidus sp900101625	3	0	0	0	0	0	0	0	3
RS_GCF_000714935.1	d__Bacteria	p__Firmicutes_K	c__Alicyclobacillia	o__Tumebacillales	f__Tumebacillaceae	g__Tumebacillus	s__Tumebacillus flagellatus	0	0	0	2	0	0	1	0	3
RS_GCF_900167535.1	d__Bacteria	p__Verrucomicrobiota	c__Verrucomicrobiae	o__Verrucomicrobiales	f__Verrucomicrobiaceae	g__Prosthecobacter	s__Prosthecobacter debontii	0	0	1	0	0	0	2	0	3
RS_GCF_000759735.1	d__Bacteria	p__Proteobacteria	c__Gammaproteobacteria	o__Enterobacterales	f__Enterobacteriaceae	g__Citrobacter	s__Citrobacter freundii	3	0	0	0	0	0	0	0	3
RS_GCF_001586165.1	d__Bacteria	p__Proteobacteria	c__Gammaproteobacteria	o__Enterobacterales	f__Enterobacteriaceae	g__Hafnia	s__Hafnia proteus	3	0	0	0	0	0	0	0	3
RS_GCF_000696095.1	d__Bacteria	p__Proteobacteria	c__Alphaproteobacteria	o__Rhizobiales	f__Rhizobiaceae	g__Rhizobium	s__Rhizobium rhizogenes	3	0	0	0	0	0	0	0	3
RS_GCF_002920535.1	d__Bacteria	p__Actinobacteriota	c__Actinobacteria	o__Streptomycetales	f__Streptomycetaceae	g__Streptomyces	s__Streptomyces sp002920535	2	0	1	0	0	0	0	0	3
RS_GCF_000832305.1	d__Bacteria	p__Proteobacteria	c__Gammaproteobacteria	o__Burkholderiales	f__Burkholderiaceae	g__Cupriavidus	s__Cupriavidus basilensis_A	3	0	0	0	0	0	0	0	3
RS_GCF_001676875.1	d__Bacteria	p__Proteobacteria	c__Gammaproteobacteria	o__Burkholderiales	f__Chromobacteriaceae	g__Chromobacterium	s__Chromobacterium subtsugae	3	0	0	0	0	0	0	0	3
RS_GCF_001555965.1	d__Bacteria	p__Proteobacteria	c__Alphaproteobacteria	o__Sphingomonadales	f__Sphingomonadaceae	g__Sphingomonas	s__Sphingomonas sp001555965	3	0	0	0	0	0	0	0	3
RS_GCF_001746295.1	d__Bacteria	p__Actinobacteriota	c__Actinobacteria	o__Streptomycetales	f__Streptomycetaceae	g__Streptomyces	s__Streptomyces sp001746295	1	0	2	0	0	0	0	0	3
RS_GCF_001022965.1	d__Bacteria	p__Proteobacteria	c__Gammaproteobacteria	o__Enterobacterales	f__Enterobacteriaceae	g__Enterobacter	s__Enterobacter cloacae_L	3	0	0	0	0	0	0	0	3
RS_GCF_002269255.1	d__Bacteria	p__Proteobacteria	c__Gammaproteobacteria	o__Enterobacterales	f__Enterobacteriaceae	g__Klebsiella	s__Klebsiella quasivariicola	3	0	0	0	0	0	0	0	3
RS_GCF_001884105.1	d__Bacteria	p__Firmicutes	c__Bacilli	o__Bacillales	f__Bacillaceae_G	g__Bacillus_A	s__Bacillus_A sp001884105	2	0	0	1	0	0	0	0	3
RS_GCF_000215745.1	d__Bacteria	p__Proteobacteria	c__Gammaproteobacteria	o__Enterobacterales	f__Enterobacteriaceae	g__Klebsiella_B	s__Klebsiella_B aerogenes	3	0	0	0	0	0	0	0	3
RS_GCF_002529455.1	d__Bacteria	p__Actinobacteriota	c__Actinobacteria	o__Streptosporangiales	f__Streptosporangiaceae	g__Nocardiopsis	s__Nocardiopsis fuscus	3	0	0	0	0	0	0	0	3
RS_GCF_001644195.2	d__Bacteria	p__Firmicutes	c__Bacilli	o__Bacillales	f__Bacillaceae_O	g__Bacillus_BL	s__Bacillus_BL marinisedimentorum	1	0	0	2	0	0	0	0	3
RS_GCF_000164635.1	d__Bacteria	p__Proteobacteria	c__Alphaproteobacteria	o__Acetobacterales	f__Acetobacteraceae	g__Roseomonas	s__Roseomonas cervicalis	3	0	0	0	0	0	0	0	3
RS_GCF_001532035.1	d__Bacteria	p__Proteobacteria	c__Gammaproteobacteria	o__Burkholderiales	f__Burkholderiaceae	g__Burkholderia	s__Burkholderia pseudomultivorans	3	0	0	0	0	0	0	0	3
RS_GCF_001547935.1	d__Bacteria	p__Proteobacteria	c__Gammaproteobacteria	o__Enterobacterales	f__Vibrionaceae	g__Vibrio	s__Vibrio tritonius	3	0	0	0	0	0	0	0	3
RS_GCF_003248275.1	d__Bacteria	p__Firmicutes_I	c__Bacilli_A	o__Paenibacillales	f__Paenibacillaceae	g__Paenibacillus	s__Paenibacillus silvae	1	0	0	2	0	0	0	0	3
RS_GCF_000020585.3	d__Bacteria	p__Proteobacteria	c__Gammaproteobacteria	o__Enterobacterales	f__Alteromonadaceae	g__Alteromonas	s__Alteromonas mediterranea	3	0	0	0	0	0	0	0	3
RS_GCF_001418415.1	d__Bacteria	p__Actinobacteriota	c__Actinobacteria	o__Streptomycetales	f__Streptomycetaceae	g__Streptomyces	s__Streptomyces hirsutus	2	0	1	0	0	0	0	0	3
RS_GCF_000379645.1	d__Bacteria	p__Actinobacteriota	c__Actinobacteria	o__Mycobacteriales	f__Micromonosporaceae	g__Actinoplanes	s__Actinoplanes globisporus	2	0	1	0	0	0	0	0	3
RS_GCF_002407025.1	d__Bacteria	p__Firmicutes_I	c__Bacilli_A	o__Paenibacillales	f__Paenibacillaceae	g__Paenibacillus	s__Paenibacillus lautus	1	0	0	2	0	0	0	0	3
RS_GCF_002925905.1	d__Bacteria	p__Proteobacteria	c__Gammaproteobacteria	o__Enterobacterales	f__Enterobacteriaceae	g__Klebsiella_A	s__Klebsiella_A michiganensis	3	0	0	0	0	0	0	0	3
RS_GCF_003002025.1	d__Bacteria	p__Proteobacteria	c__Gammaproteobacteria	o__Burkholderiales	f__Burkholderiaceae	g__Paraburkholderia	s__Paraburkholderia sp003002025	3	0	0	0	0	0	0	0	3
RS_GCF_900090275.1	d__Bacteria	p__Actinobacteriota	c__Actinobacteria	o__Mycobacteriales	f__Micromonosporaceae	g__Micromonospora	s__Micromonospora zamorensis	3	0	0	0	0	0	0	0	3
RS_GCF_000010525.1	d__Bacteria	p__Proteobacteria	c__Alphaproteobacteria	o__Rhizobiales	f__Xanthobacteraceae	g__Azorhizobium	s__Azorhizobium caulinodans	3	0	0	0	0	0	0	0	3
RS_GCF_000410515.1	d__Bacteria	p__Proteobacteria	c__Gammaproteobacteria	o__Enterobacterales	f__Enterobacteriaceae	g__Kosakonia	s__Kosakonia sp000410515	3	0	0	0	0	0	0	0	3
RS_GCF_000716445.1	d__Bacteria	p__Actinobacteriota	c__Actinobacteria	o__Streptomycetales	f__Streptomycetaceae	g__Streptomyces	s__Streptomyces wedmorensis	2	0	1	0	0	0	0	0	3
RS_GCF_000007825.1	d__Bacteria	p__Firmicutes	c__Bacilli	o__Bacillales	f__Bacillaceae_G	g__Bacillus_A	s__Bacillus_A cereus	2	0	0	1	0	0	0	0	3
RS_GCF_001976075.1	d__Bacteria	p__Proteobacteria	c__Gammaproteobacteria	o__Xanthomonadales	f__Xanthomonadaceae	g__Xanthomonas	s__Xanthomonas perforans	3	0	0	0	0	0	0	0	3
RS_GCF_000316035.1	d__Bacteria	p__Firmicutes_I	c__Bacilli_A	o__Paenibacillales	f__Paenibacillaceae	g__Paenibacillus	s__Paenibacillus sp000316035	1	0	0	2	0	0	0	0	3
RS_GCF_003058225.1	d__Bacteria	p__Actinobacteriota	c__Actinobacteria	o__Actinomycetales	f__Cellulomonadaceae	g__Promicromonospora	s__Promicromonospora sp003058225	3	0	0	0	0	0	0	0	3
RS_GCF_001691555.1	d__Bacteria	p__Proteobacteria	c__Gammaproteobacteria	o__Enterobacterales	f__Enterobacteriaceae	g__Pantoea	s__Pantoea eucrina_A	3	0	0	0	0	0	0	0	3
RS_GCF_002561295.1	d__Bacteria	p__Firmicutes	c__Bacilli	o__Bacillales	f__Bacillaceae_G	g__Bacillus_A	s__Bacillus_A cereus_S	2	0	0	1	0	0	0	0	3
RS_GCF_002953215.1	d__Bacteria	p__Proteobacteria	c__Gammaproteobacteria	o__Enterobacterales	f__Enterobacteriaceae	g__Pantoea_B	s__Pantoea_B calida	3	0	0	0	0	0	0	0	3
RS_GCF_002584985.1	d__Bacteria	p__Firmicutes	c__Bacilli	o__Bacillales	f__Bacillaceae_G	g__Bacillus_A	s__Bacillus_A sp002584985	2	0	0	1	0	0	0	0	3
RS_GCF_001995985.1	d__Bacteria	p__Proteobacteria	c__Gammaproteobacteria	o__Enterobacterales	f__Vibrionaceae	g__Salinivibrio	s__Salinivibrio sharmensis	3	0	0	0	0	0	0	0	3
RS_GCF_001544595.1	d__Bacteria	p__Proteobacteria	c__Gammaproteobacteria	o__Burkholderiales	f__Burkholderiaceae	g__Caballeronia	s__Caballeronia peredens	3	0	0	0	0	0	0	0	3
GB_GCA_001883705.1	d__Bacteria	p__Proteobacteria	c__Gammaproteobacteria	o__Burkholderiales	f__Burkholderiaceae	g__Burkholderia	s__Burkholderia catarinensis	3	0	0	0	0	0	0	0	3
GB_GCA_002389975.1	d__Bacteria	p__Proteobacteria	c__Gammaproteobacteria	o__Enterobacterales	f__Enterobacteriaceae	g__Pantoea	s__Pantoea sp002389975	3	0	0	0	0	0	0	0	3
RS_GCF_900176145.1	d__Bacteria	p__Firmicutes_E	c__Sulfobacillia	o__Sulfobacillales	f__Sulfobacillaceae	g__Sulfobacillus	s__Sulfobacillus thermosulfidooxidans	3	0	0	0	0	0	0	0	3
RS_GCF_000718025.1	d__Bacteria	p__Actinobacteriota	c__Actinobacteria	o__Streptomycetales	f__Streptomycetaceae	g__Kitasatospora	s__Kitasatospora purpeofusca	3	0	0	0	0	0	0	0	3
RS_GCF_900091435.1	d__Bacteria	p__Actinobacteriota	c__Actinobacteria	o__Mycobacteriales	f__Micromonosporaceae	g__Micromonospora	s__Micromonospora chaiyaphumensis	2	0	1	0	0	0	0	0	3
RS_GCF_001875655.1	d__Bacteria	p__Proteobacteria	c__Gammaproteobacteria	o__Enterobacterales	f__Enterobacteriaceae	g__Enterobacter	s__Enterobacter hormaechei	3	0	0	0	0	0	0	0	3
RS_GCF_001648775.1	d__Bacteria	p__Proteobacteria	c__Gammaproteobacteria	o__Pseudomonadales	f__Pseudomonadaceae	g__Pseudomonas_E	s__Pseudomonas_E fluorescens_M	3	0	0	0	0	0	0	0	3
RS_GCF_000148685.1	d__Bacteria	p__Proteobacteria	c__Gammaproteobacteria	o__Burkholderiales	f__Burkholderiaceae	g__Paraburkholderia	s__Paraburkholderia sp000148685	3	0	0	0	0	0	0	0	3
RS_GCF_000236035.1	d__Bacteria	p__Proteobacteria	c__Gammaproteobacteria	o__Pseudomonadales	f__Halomonadaceae	g__Halomonas	s__Halomonas boliviensis	3	0	0	0	0	0	0	0	3
RS_GCF_900102085.1	d__Bacteria	p__Firmicutes_I	c__Bacilli_A	o__Paenibacillales	f__Paenibacillaceae	g__Paenibacillus	s__Paenibacillus polysaccharolyticus	1	0	0	2	0	0	0	0	3
RS_GCF_001717955.1	d__Bacteria	p__Proteobacteria	c__Alphaproteobacteria	o__Sphingomonadales	f__Sphingomonadaceae	g__Sphingomonas	s__Sphingomonas panacis	3	0	0	0	0	0	0	0	3
RS_GCF_003111685.1	d__Bacteria	p__Proteobacteria	c__Alphaproteobacteria	o__Rhodobacterales	f__Rhodobacteraceae	g__Salipiger	s__Salipiger pacifica_A	3	0	0	0	0	0	0	0	3
RS_GCF_001521715.1	d__Bacteria	p__Proteobacteria	c__Gammaproteobacteria	o__Enterobacterales	f__Enterobacteriaceae	g__Enterobacter	s__Enterobacter asburiae	3	0	0	0	0	0	0	0	3
RS_GCF_002607735.1	d__Bacteria	p__Proteobacteria	c__Gammaproteobacteria	o__Enterobacterales	f__Enterobacteriaceae	g__Proteus	s__Proteus alimentorum	3	0	0	0	0	0	0	0	3
RS_GCF_002019795.1	d__Bacteria	p__Firmicutes	c__Bacilli	o__Bacillales	f__Bacillaceae_F	g__Bacillus_AO	s__Bacillus_AO sp002019795	0	0	0	3	0	0	0	0	3
GB_GCA_001767455.1	d__Bacteria	p__Acidobacteriota	c__Vicinamibacteria	o__Vicinamibacterales	f__2-12-FULL-66-21	g__2-12-FULL-66-21	s__2-12-FULL-66-21 sp001767455	1	0	0	0	0	0	1	1	3
RS_GCF_000496285.1	d__Bacteria	p__Firmicutes	c__Bacilli	o__Bacillales	f__Bacillaceae_G	g__Bacillus_A	s__Bacillus_A toyonensis	2	0	0	1	0	0	0	0	3
RS_GCF_000756815.1	d__Bacteria	p__Proteobacteria	c__Gammaproteobacteria	o__Legionellales	f__Legionellaceae	g__Tatlockia	s__Tatlockia massiliensis	3	0	0	0	0	0	0	0	3
RS_GCF_000024545.1	d__Bacteria	p__Actinobacteriota	c__Actinobacteria	o__Mycobacteriales	f__Micromonosporaceae	g__Stackebrandtia	s__Stackebrandtia nassauensis	3	0	0	0	0	0	0	0	3
RS_GCF_003207815.1	d__Bacteria	p__Proteobacteria	c__Alphaproteobacteria	o__Acetobacterales	f__Acetobacteraceae	g__Komagataeibacter	s__Komagataeibacter oboediens	3	0	0	0	0	0	0	0	3
GB_GCA_001725235.1	d__Bacteria	p__Proteobacteria	c__Gammaproteobacteria	o__Burkholderiales	f__Burkholderiaceae	g__Acidovorax_C	s__Acidovorax_C sp001725235	2	0	0	0	0	0	1	0	3
RS_GCF_000230915.1	d__Bacteria	p__Firmicutes_I	c__Bacilli_A	o__Paenibacillales	f__Paenibacillaceae	g__Paenibacillus	s__Paenibacillus lactis	1	0	0	2	0	0	0	0	3
GB_GCA_002482565.1	d__Bacteria	p__Desulfobacterota_A	c__Desulfovibrionia	o__Desulfovibrionales	f__Desulfovibrionaceae	g__Desulfovibrio_F	s__Desulfovibrio_F magneticus_B	2	0	0	0	0	0	1	0	3
RS_GCF_001905045.1	d__Bacteria	p__Actinobacteriota	c__Actinobacteria	o__Streptomycetales	f__Streptomycetaceae	g__Kitasatospora	s__Kitasatospora sp001905045	1	0	2	0	0	0	0	0	3
RS_GCF_000472865.1	d__Bacteria	p__Proteobacteria	c__Alphaproteobacteria	o__Rhizobiales	f__Xanthobacteraceae	g__Bradyrhizobium	s__Bradyrhizobium elkanii_A	3	0	0	0	0	0	0	0	3
RS_GCF_000785435.1	d__Bacteria	p__Proteobacteria	c__Gammaproteobacteria	o__Burkholderiales	f__Burkholderiaceae	g__Paraburkholderia_B	s__Paraburkholderia_B sacchari	3	0	0	0	0	0	0	0	3
RS_GCF_002146655.1	d__Bacteria	p__Firmicutes	c__Bacilli	o__Bacillales	f__Bacillaceae_G	g__Bacillus_A	s__Bacillus_A thuringiensis_M	2	0	0	1	0	0	0	0	3
RS_GCF_002918505.1	d__Bacteria	p__Proteobacteria	c__Gammaproteobacteria	o__Enterobacterales	f__Enterobacteriaceae	g__Citrobacter	s__Citrobacter freundii_E	3	0	0	0	0	0	0	0	3
RS_GCF_001267535.1	d__Bacteria	p__Proteobacteria	c__Gammaproteobacteria	o__Enterobacterales	f__Enterobacteriaceae	g__Erwinia	s__Erwinia iniecta	3	0	0	0	0	0	0	0	3
RS_GCF_000982825.1	d__Bacteria	p__Proteobacteria	c__Gammaproteobacteria	o__Enterobacterales	f__Enterobacteriaceae	g__Cronobacter	s__Cronobacter sakazakii	3	0	0	0	0	0	0	0	3
RS_GCF_001519065.1	d__Bacteria	p__Proteobacteria	c__Alphaproteobacteria	o__Sphingomonadales	f__Sphingomonadaceae	g__Novosphingobium	s__Novosphingobium sp001519065	3	0	0	0	0	0	0	0	3
RS_GCF_002918705.1	d__Bacteria	p__Proteobacteria	c__Gammaproteobacteria	o__Enterobacterales	f__Enterobacteriaceae	g__Pseudescherichia	s__Pseudescherichia sp002918705	3	0	0	0	0	0	0	0	3
RS_GCF_900094905.1	d__Bacteria	p__Firmicutes	c__Bacilli	o__Bacillales	f__Bacillaceae_G	g__Bacillus_A	s__Bacillus_A cereus_AG	2	0	0	1	0	0	0	0	3
RS_GCF_001718555.1	d__Bacteria	p__Proteobacteria	c__Gammaproteobacteria	o__Burkholderiales	f__Burkholderiaceae	g__Burkholderia	s__Burkholderia metallica	3	0	0	0	0	0	0	0	3
RS_GCF_003026455.1	d__Bacteria	p__Proteobacteria	c__Gammaproteobacteria	o__Enterobacterales	f__Vibrionaceae	g__Photobacterium	s__Photobacterium rosenbergii	3	0	0	0	0	0	0	0	3
RS_GCF_003144315.1	d__Bacteria	p__Firmicutes_K	c__Alicyclobacillia	o__Alicyclobacillales	f__Acidibacillaceae	g__Acidibacillus_A	s__Acidibacillus_A sulfuroxidans	2	0	0	1	0	0	0	0	3
RS_GCF_000422785.1	d__Bacteria	p__Proteobacteria	c__Alphaproteobacteria	o__Rhizobiales	f__Stappiaceae	g__Nesiotobacter	s__Nesiotobacter exalbescens	3	0	0	0	0	0	0	0	3
RS_GCF_001188365.1	d__Bacteria	p__Firmicutes_I	c__Bacilli_A	o__Paenibacillales	f__Paenibacillaceae	g__Paenibacillus_O	s__Paenibacillus_O sp001188365	0	0	0	3	0	0	0	0	3
RS_GCF_900324475.1	d__Bacteria	p__Proteobacteria	c__Gammaproteobacteria	o__Enterobacterales	f__Enterobacteriaceae	g__Enterobacter	s__Enterobacter bugandensis	3	0	0	0	0	0	0	0	3
GB_GCA_002359495.1	d__Bacteria	p__Proteobacteria	c__Gammaproteobacteria	o__Enterobacterales	f__Enterobacteriaceae	g__Pantoea	s__Pantoea sp002359495	3	0	0	0	0	0	0	0	3
RS_GCF_900099785.1	d__Bacteria	p__Proteobacteria	c__Gammaproteobacteria	o__Pseudomonadales	f__Pseudomonadaceae	g__Pseudomonas	s__Pseudomonas panipatensis	3	0	0	0	0	0	0	0	3
GB_GCA_003240795.1	d__Bacteria	p__Proteobacteria	c__Alphaproteobacteria	o__Micavibrionales	f__Micavibrionaceae	g__Micavibrio_A	s__Micavibrio_A aeruginosavorus_B	2	0	0	0	0	0	1	0	3
GB_GCA_003287275.1	d__Bacteria	p__Firmicutes_I	c__Bacilli_A	o__Paenibacillales	f__Paenibacillaceae	g__Paenibacillus	s__Paenibacillus taichungensis	1	0	0	2	0	0	0	0	3
GB_GCA_003023695.1	d__Bacteria	p__Firmicutes_E	c__Sulfobacillia	o__Sulfobacillales	f__Sulfobacillaceae	g__Sulfobacillus_C	s__Sulfobacillus_C benefaciens	3	0	0	0	0	0	0	0	3
RS_GCF_000300455.3	d__Bacteria	p__Proteobacteria	c__Gammaproteobacteria	o__Enterobacterales	f__Enterobacteriaceae	g__Kosakonia	s__Kosakonia sacchari	3	0	0	0	0	0	0	0	3
RS_GCF_000716785.1	d__Bacteria	p__Actinobacteriota	c__Actinobacteria	o__Mycobacteriales	f__Pseudonocardiaceae	g__Amycolatopsis	s__Amycolatopsis vancoresmycina	3	0	0	0	0	0	0	0	3
RS_GCF_000621445.1	d__Bacteria	p__Firmicutes	c__Bacilli	o__Bacillales	f__Bacillaceae_F	g__Bacillus_AO	s__Bacillus_AO bogoriensis	0	0	0	3	0	0	0	0	3
RS_GCF_000718775.1	d__Bacteria	p__Actinobacteriota	c__Actinobacteria	o__Streptomycetales	f__Streptomycetaceae	g__Streptomyces	s__Streptomyces sp000718775	2	0	1	0	0	0	0	0	3
RS_GCF_002157795.1	d__Bacteria	p__Proteobacteria	c__Gammaproteobacteria	o__Enterobacterales	f__Vibrionaceae	g__Thaumasiovibrio	s__Thaumasiovibrio occultus	3	0	0	0	0	0	0	0	3
RS_GCF_000203915.1	d__Bacteria	p__Proteobacteria	c__Gammaproteobacteria	o__Burkholderiales	f__Burkholderiaceae	g__Burkholderia	s__Burkholderia ambifaria	3	0	0	0	0	0	0	0	3
RS_GCF_001658025.1	d__Bacteria	p__Proteobacteria	c__Gammaproteobacteria	o__Enterobacterales	f__Enterobacteriaceae	g__Kosakonia	s__Kosakonia oryzae	3	0	0	0	0	0	0	0	3
RS_GCF_000510645.1	d__Bacteria	p__Firmicutes_I	c__Bacilli_A	o__Thermicanales	f__Thermicanaceae	g__Thermicanus	s__Thermicanus aegyptius	1	0	0	1	0	0	1	0	3
RS_GCF_001544495.1	d__Bacteria	p__Proteobacteria	c__Gammaproteobacteria	o__Burkholderiales	f__Burkholderiaceae	g__Caballeronia	s__Caballeronia telluris	3	0	0	0	0	0	0	0	3
RS_GCF_000721515.1	d__Bacteria	p__Actinobacteriota	c__Actinobacteria	o__Streptomycetales	f__Streptomycetaceae	g__Streptomyces	s__Streptomyces sp000721515	3	0	0	0	0	0	0	0	3
RS_GCF_002095305.1	d__Bacteria	p__Proteobacteria	c__Gammaproteobacteria	o__Enterobacterales	f__Enterobacteriaceae	g__Pantoea	s__Pantoea brenneri	3	0	0	0	0	0	0	0	3
RS_GCF_900143695.1	d__Bacteria	p__Desulfobacterota	c__Desulfobulbia	o__Desulfobulbales	f__Desulfocapsaceae	g__Desulfopila	s__Desulfopila aestuarii	2	0	0	0	0	0	1	0	3
RS_GCF_003160695.1	d__Bacteria	p__Actinobacteriota	c__Actinobacteria	o__Propionibacteriales	f__Nocardioidaceae	g__Nocardioides	s__Nocardioides sp003160695	1	0	2	0	0	0	0	0	3
RS_GCF_002940045.1	d__Bacteria	p__Proteobacteria	c__Gammaproteobacteria	o__Xanthomonadales	f__Xanthomonadaceae	g__Xanthomonas	s__Xanthomonas pisi	3	0	0	0	0	0	0	0	3
GB_GCA_001898225.1	d__Bacteria	p__Chloroflexota	c__Chloroflexia	o__54-19	f__54-19	g__54-19	s__54-19 sp001898225	2	0	1	0	0	0	0	0	3
RS_GCF_000257205.1	d__Bacteria	p__Proteobacteria	c__Gammaproteobacteria	o__Enterobacterales	f__Vibrionaceae	g__Vibrio	s__Vibrio ordalii	3	0	0	0	0	0	0	0	3
RS_GCF_000248015.1	d__Bacteria	p__Proteobacteria	c__Gammaproteobacteria	o__Enterobacterales	f__Enterobacteriaceae	g__Atlantibacter	s__Atlantibacter hermannii	3	0	0	0	0	0	0	0	3
RS_GCF_002220095.1	d__Bacteria	p__Proteobacteria	c__Alphaproteobacteria	o__Rhizobiales	f__Beijerinckiaceae	g__Bosea	s__Bosea sp002220095	3	0	0	0	0	0	0	0	3
RS_GCF_001865575.1	d__Bacteria	p__Proteobacteria	c__Gammaproteobacteria	o__Burkholderiales	f__Burkholderiaceae	g__Paraburkholderia	s__Paraburkholderia sprentiae	3	0	0	0	0	0	0	0	3
RS_GCF_900107695.1	d__Bacteria	p__Proteobacteria	c__Gammaproteobacteria	o__Thiotrichales	f__Thiotrichaceae	g__Thiothrix	s__Thiothrix caldifontis	2	0	0	0	0	0	1	0	3
RS_GCF_003176735.1	d__Bacteria	p__Actinobacteriota	c__Actinobacteria	o__Mycobacteriales	f__Micromonosporaceae	g__Micromonospora	s__Micromonospora sp003176735	2	0	1	0	0	0	0	0	3
RS_GCF_000291355.1	d__Bacteria	p__Firmicutes	c__Bacilli	o__Bacillales	f__Bacillaceae_G	g__Bacillus_A	s__Bacillus_A cereus_O	2	0	0	1	0	0	0	0	3
GB_GCA_003030785.1	d__Bacteria	p__Proteobacteria	c__Gammaproteobacteria	o__Pseudomonadales	f__Oleiphilaceae	g__Marinobacter	s__Marinobacter sp003030785	2	0	0	1	0	0	0	0	3
RS_GCF_002893095.1	d__Bacteria	p__Proteobacteria	c__Gammaproteobacteria	o__Xanthomonadales	f__Xanthomonadaceae	g__Stenotrophomonas	s__Stenotrophomonas sp002893095	3	0	0	0	0	0	0	0	3
RS_GCF_003253405.1	d__Bacteria	p__Proteobacteria	c__Gammaproteobacteria	o__Burkholderiales	f__Burkholderiaceae	g__Paraburkholderia_B	s__Paraburkholderia_B sp003253405	3	0	0	0	0	0	0	0	3
RS_GCF_900110765.1	d__Bacteria	p__Proteobacteria	c__Gammaproteobacteria	o__Pseudomonadales	f__Pseudomonadaceae	g__Pseudomonas_E	s__Pseudomonas_E sp900110765	3	0	0	0	0	0	0	0	3
RS_GCF_003236395.1	d__Bacteria	p__Actinobacteriota	c__Actinobacteria	o__Streptosporangiales	f__Streptosporangiaceae	g__Nonomuraea	s__Nonomuraea sp003236395	3	0	0	0	0	0	0	0	3
RS_GCF_900114375.1	d__Bacteria	p__Proteobacteria	c__Alphaproteobacteria	o__Rhizobiales	f__Beijerinckiaceae	g__Methylobacterium	s__Methylobacterium salsuginis	3	0	0	0	0	0	0	0	3
RS_GCF_000160755.1	d__Bacteria	p__Proteobacteria	c__Gammaproteobacteria	o__Enterobacterales	f__Enterobacteriaceae	g__Proteus	s__Proteus mirabilis	3	0	0	0	0	0	0	0	3
RS_GCF_001482415.1	d__Bacteria	p__Actinobacteriota	c__Actinobacteria	o__Streptomycetales	f__Streptomycetaceae	g__Streptomyces	s__Streptomyces silvensis	3	0	0	0	0	0	0	0	3
RS_GCF_000368065.1	d__Bacteria	p__Proteobacteria	c__Gammaproteobacteria	o__Pseudomonadales	f__Moraxellaceae	g__Acinetobacter	s__Acinetobacter seifertii	3	0	0	0	0	0	0	0	3
RS_GCF_000720335.1	d__Bacteria	p__Actinobacteriota	c__Actinobacteria	o__Propionibacteriales	f__Nocardioidaceae	g__Marmoricola	s__Marmoricola aequoreus	1	0	2	0	0	0	0	0	3
GB_GCA_002327445.1	d__Bacteria	p__Desulfobacterota	c__Desulfobacteria	o__Desulfobacterales	f__Desulfosarcinaceae_B	g__UBA2174	s__UBA2174 sp002327445	2	0	0	0	0	0	1	0	3
GB_GCA_002333125.1	d__Bacteria	p__Proteobacteria	c__Gammaproteobacteria	o__Pseudomonadales	f__Moraxellaceae	g__Agitococcus	s__Agitococcus sp002333125	3	0	0	0	0	0	0	0	3
RS_GCF_003261585.1	d__Bacteria	p__Proteobacteria	c__Gammaproteobacteria	o__Pseudomonadales	f__Moraxellaceae	g__Acinetobacter	s__Acinetobacter sp003261585	3	0	0	0	0	0	0	0	3
RS_GCF_900108175.1	d__Bacteria	p__Actinobacteriota	c__Actinobacteria	o__Streptosporangiales	f__Streptosporangiaceae	g__Thermomonospora	s__Thermomonospora echinospora	1	0	2	0	0	0	0	0	3
GB_GCA_900323515.1	d__Bacteria	p__Proteobacteria	c__Gammaproteobacteria	o__Pseudomonadales	f__Moraxellaceae	g__Acinetobacter	s__Acinetobacter sp900323515	3	0	0	0	0	0	0	0	3
RS_GCF_001595725.1	d__Bacteria	p__Firmicutes	c__Bacilli	o__Bacillales	f__Bacillaceae_G	g__Bacillus_A	s__Bacillus_A thuringiensis_K	2	0	0	1	0	0	0	0	3
RS_GCF_900166585.1	d__Bacteria	p__Firmicutes	c__Bacilli	o__Bacillales	f__Bacillaceae_A	g__Bacillus_Y	s__Bacillus_Y jeotgali_A	1	0	0	2	0	0	0	0	3
RS_GCF_002706795.1	d__Bacteria	p__Firmicutes_I	c__Bacilli_A	o__Brevibacillales	f__Brevibacillaceae	g__Brevibacillus_B	s__Brevibacillus_B laterosporus	1	0	0	2	0	0	0	0	3
RS_GCF_000177215.2	d__Bacteria	p__Desulfobacterota_A	c__Desulfovibrionia	o__Desulfovibrionales	f__Desulfovibrionaceae	g__Desulfovibrio_F	s__Desulfovibrio_F sp000177215	2	0	0	0	0	0	1	0	3
RS_GCF_000291295.1	d__Bacteria	p__Firmicutes	c__Bacilli	o__Bacillales	f__Bacillaceae_G	g__Bacillus_A	s__Bacillus_A cereus_U	2	0	0	1	0	0	0	0	3
GB_GCA_001636975.1	d__Bacteria	p__Proteobacteria	c__Gammaproteobacteria	o__Burkholderiales	f__Burkholderiaceae	g__Paraburkholderia	s__Paraburkholderia kirstenboschensis	3	0	0	0	0	0	0	0	3
RS_GCF_003253565.1	d__Bacteria	p__Chloroflexota	c__Ktedonobacteria	o__Ktedonobacterales	f__Ktedonobacteraceae	g__Thermosporothrix	s__Thermosporothrix hazakensis	2	0	1	0	0	0	0	0	3
RS_GCF_001544755.2	d__Bacteria	p__Proteobacteria	c__Gammaproteobacteria	o__Burkholderiales	f__Burkholderiaceae	g__Caballeronia	s__Caballeronia catudaia	3	0	0	0	0	0	0	0	3
RS_GCF_000773965.1	d__Bacteria	p__Proteobacteria	c__Gammaproteobacteria	o__Enterobacterales	f__Enterobacteriaceae	g__Pantoea	s__Pantoea cancerogenus	3	0	0	0	0	0	0	0	3
GB_GCA_003096715.1	d__Bacteria	p__Proteobacteria	c__Gammaproteobacteria	o__Burkholderiales	f__Burkholderiaceae	g__Paraburkholderia_B	s__Paraburkholderia_B silvatlantica	3	0	0	0	0	0	0	0	3
RS_GCF_000367945.1	d__Bacteria	p__Proteobacteria	c__Gammaproteobacteria	o__Pseudomonadales	f__Moraxellaceae	g__Acinetobacter	s__Acinetobacter proteolyticus	3	0	0	0	0	0	0	0	3
RS_GCF_000774035.1	d__Bacteria	p__Proteobacteria	c__Gammaproteobacteria	o__Xanthomonadales	f__Xanthomonadaceae	g__Xanthomonas	s__Xanthomonas phaseoli	3	0	0	0	0	0	0	0	3
GB_GCA_003096615.1	d__Bacteria	p__Proteobacteria	c__Alphaproteobacteria	o__Rhizobiales	f__Beijerinckiaceae	g__Methylobacterium	s__Methylobacterium organophilum	3	0	0	0	0	0	0	0	3
RS_GCF_000010665.1	d__Bacteria	p__Desulfobacterota_A	c__Desulfovibrionia	o__Desulfovibrionales	f__Desulfovibrionaceae	g__Desulfovibrio_F	s__Desulfovibrio_F magneticus	2	0	0	0	0	0	1	0	3
RS_GCF_001297775.1	d__Bacteria	p__Proteobacteria	c__Gammaproteobacteria	o__Enterobacterales	f__Enterobacteriaceae	g__Trabulsiella	s__Trabulsiella odontotermitis_B	3	0	0	0	0	0	0	0	3
GB_GCA_003050645.1	d__Bacteria	p__Firmicutes_I	c__Bacilli_A	o__Thermicanales	f__Thermicanaceae	g__Carbobacillus	s__Carbobacillus altaicus	1	0	0	0	0	0	2	0	3
RS_GCF_002803325.1	d__Bacteria	p__Firmicutes_I	c__Bacilli_A	o__Paenibacillales	f__Paenibacillaceae	g__Paenibacillus	s__Paenibacillus glucanolyticus_A	1	0	0	2	0	0	0	0	3
RS_GCF_001653935.1	d__Bacteria	p__Proteobacteria	c__Gammaproteobacteria	o__Burkholderiales	f__Burkholderiaceae	g__Ralstonia	s__Ralstonia insidiosa	3	0	0	0	0	0	0	0	3
RS_GCF_000400735.1	d__Bacteria	p__Proteobacteria	c__Gammaproteobacteria	o__Pseudomonadales	f__Moraxellaceae	g__Acinetobacter	s__Acinetobacter tandoii	3	0	0	0	0	0	0	0	3
RS_GCF_000812465.1	d__Bacteria	p__Proteobacteria	c__Gammaproteobacteria	o__Burkholderiales	f__Burkholderiaceae	g__Cupriavidus	s__Cupriavidus sp000812465	3	0	0	0	0	0	0	0	3
RS_GCF_900110755.1	d__Bacteria	p__Actinobacteriota	c__Actinobacteria	o__Streptomycetales	f__Streptomycetaceae	g__Streptomyces	s__Streptomyces sp900110755	2	0	1	0	0	0	0	0	3
RS_GCF_000155575.1	d__Bacteria	p__Proteobacteria	c__Alphaproteobacteria	o__Caulobacterales	f__Caulobacteraceae	g__Brevundimonas	s__Brevundimonas sp000155575	3	0	0	0	0	0	0	0	3
RS_GCF_000960995.1	d__Bacteria	p__Proteobacteria	c__Gammaproteobacteria	o__Burkholderiales	f__Burkholderiaceae	g__Burkholderia	s__Burkholderia glumae	3	0	0	0	0	0	0	0	3
RS_GCF_900116015.1	d__Bacteria	p__Proteobacteria	c__Gammaproteobacteria	o__Enterobacterales	f__Enterobacteriaceae	g__Enterobacter_D	s__Enterobacter_D sp900116015	3	0	0	0	0	0	0	0	3
RS_GCF_000829675.1	d__Bacteria	p__Proteobacteria	c__Gammaproteobacteria	o__Pseudomonadales	f__Moraxellaceae	g__Acinetobacter	s__Acinetobacter rudis	3	0	0	0	0	0	0	0	3
RS_GCF_003207865.1	d__Bacteria	p__Proteobacteria	c__Alphaproteobacteria	o__Acetobacterales	f__Acetobacteraceae	g__Komagataeibacter	s__Komagataeibacter sucrofermentans	3	0	0	0	0	0	0	0	3
RS_GCF_900115075.1	d__Bacteria	p__Proteobacteria	c__Gammaproteobacteria	o__Enterobacterales	f__Enterobacteriaceae	g__Pantoea	s__Pantoea sp900115075	3	0	0	0	0	0	0	0	3
GB_GCA_003261055.1	d__Bacteria	p__Actinobacteriota	c__Actinobacteria	o__Streptomycetales	f__Streptomycetaceae	g__Streptomyces	s__Streptomyces sp003261055	1	0	2	0	0	0	0	0	3
RS_GCF_001720485.1	d__Bacteria	p__Proteobacteria	c__Gammaproteobacteria	o__Pseudomonadales	f__Halomonadaceae	g__Cobetia	s__Cobetia marina	3	0	0	0	0	0	0	0	3
RS_GCF_000021305.1	d__Bacteria	p__Firmicutes	c__Bacilli	o__Bacillales	f__Bacillaceae_G	g__Bacillus_A	s__Bacillus_A thuringiensis_S	2	0	0	1	0	0	0	0	3
GB_GCA_001771985.1	d__Bacteria	p__Proteobacteria	c__Gammaproteobacteria	o__Burkholderiales	f__SG8-41	g__2-12-FULL-62-58	s__2-12-FULL-62-58 sp001771985	0	0	0	0	0	0	0	3	3
RS_GCF_900099965.1	d__Bacteria	p__Actinobacteriota	c__Actinobacteria	o__Streptosporangiales	f__Streptosporangiaceae	g__Nonomuraea	s__Nonomuraea jiangxiensis	2	0	1	0	0	0	0	0	3
RS_GCF_002211105.1	d__Bacteria	p__Proteobacteria	c__Gammaproteobacteria	o__Pseudomonadales	f__Halomonadaceae	g__Halomonas	s__Halomonas campaniensis_A	3	0	0	0	0	0	0	0	3
RS_GCF_002075345.1	d__Bacteria	p__Proteobacteria	c__Gammaproteobacteria	o__Enterobacterales	f__Enterobacteriaceae	g__Citrobacter	s__Citrobacter braakii	3	0	0	0	0	0	0	0	3
RS_GCF_001443045.1	d__Bacteria	p__Proteobacteria	c__Gammaproteobacteria	o__Burkholderiales	f__Burkholderiaceae	g__Burkholderia	s__Burkholderia ambifaria_A	3	0	0	0	0	0	0	0	3
RS_GCF_000701325.1	d__Bacteria	p__Actinobacteriota	c__Actinobacteria	o__Streptomycetales	f__Streptomycetaceae	g__Streptomyces_B	s__Streptomyces_B sp000701325	1	0	2	0	0	0	0	0	3
RS_GCF_900109265.1	d__Bacteria	p__Proteobacteria	c__Gammaproteobacteria	o__Burkholderiales	f__Burkholderiaceae	g__Paraburkholderia_B	s__Paraburkholderia_B tropica	3	0	0	0	0	0	0	0	3
RS_GCF_000759835.1	d__Bacteria	p__Proteobacteria	c__Gammaproteobacteria	o__Enterobacterales	f__Enterobacteriaceae	g__Citrobacter_A	s__Citrobacter_A sedlakii	3	0	0	0	0	0	0	0	3
RS_GCF_001426705.1	d__Bacteria	p__Actinobacteriota	c__Actinobacteria	o__Actinomycetales	f__Cellulomonadaceae	g__Cellulomonas	s__Cellulomonas sp001426705	3	0	0	0	0	0	0	0	3
RS_GCF_000739815.1	d__Bacteria	p__Proteobacteria	c__Gammaproteobacteria	o__Burkholderiales	f__Burkholderiaceae	g__Paraburkholderia_B	s__Paraburkholderia_B mimosarum	3	0	0	0	0	0	0	0	3
RS_GCF_002920615.1	d__Bacteria	p__Actinobacteriota	c__Actinobacteria	o__Streptomycetales	f__Streptomycetaceae	g__Streptomyces	s__Streptomyces sp002920615	1	0	2	0	0	0	0	0	3
GB_GCA_900105125.1	d__Bacteria	p__Proteobacteria	c__Alphaproteobacteria	o__Rhizobiales	f__Xanthobacteraceae	g__Bradyrhizobium	s__Bradyrhizobium canariense_A	3	0	0	0	0	0	0	0	3
GB_GCA_003268635.1	d__Bacteria	p__Firmicutes_I	c__Bacilli_A	o__Paenibacillales	f__Paenibacillaceae	g__Paenibacillus	s__Paenibacillus sp003268635	1	0	0	2	0	0	0	0	3
RS_GCF_001996165.1	d__Bacteria	p__Proteobacteria	c__Gammaproteobacteria	o__Enterobacterales	f__Vibrionaceae	g__Salinivibrio	s__Salinivibrio proteolyticus	3	0	0	0	0	0	0	0	3
RS_GCF_002574955.1	d__Bacteria	p__Firmicutes	c__Bacilli	o__Bacillales	f__Bacillaceae_G	g__Bacillus_A	s__Bacillus_A cereus_AT	2	0	0	1	0	0	0	0	3
RS_GCF_001660815.1	d__Bacteria	p__Proteobacteria	c__Gammaproteobacteria	o__Xanthomonadales	f__Xanthomonadaceae	g__Xanthomonas	s__Xanthomonas nasturtii	3	0	0	0	0	0	0	0	3
RS_GCF_001542815.1	d__Bacteria	p__Proteobacteria	c__Alphaproteobacteria	o__Rhizobiales	f__Beijerinckiaceae	g__Methylobacterium	s__Methylobacterium sp001542815	3	0	0	0	0	0	0	0	3
RS_GCF_002113595.1	d__Bacteria	p__Proteobacteria	c__Gammaproteobacteria	o__Pseudomonadales	f__Pseudomonadaceae	g__Pseudomonas_E	s__Pseudomonas_E sp002113595	3	0	0	0	0	0	0	0	3
RS_GCF_001956175.1	d__Bacteria	p__Firmicutes_I	c__Bacilli_A	o__Paenibacillales	f__Paenibacillaceae	g__Paenibacillus	s__Paenibacillus amylolyticus_C	1	0	0	2	0	0	0	0	3
RS_GCF_000802365.1	d__Bacteria	p__Proteobacteria	c__Gammaproteobacteria	o__Xanthomonadales	f__Xanthomonadaceae	g__Xanthomonas	s__Xanthomonas cannabis	3	0	0	0	0	0	0	0	3
GB_GCA_001280155.1	d__Bacteria	p__Proteobacteria	c__Alphaproteobacteria	o__Rhizobiales	f__Beijerinckiaceae	g__Methylobacterium	s__Methylobacterium purpurogeneiscleroticus	3	0	0	0	0	0	0	0	3
RS_GCF_900078685.2	d__Bacteria	p__Actinobacteriota	c__Actinobacteria	o__Mycobacteriales	f__Mycobacteriaceae	g__Mycolicibacter	s__Mycolicibacter icosiumassiliensis	3	0	0	0	0	0	0	0	3
RS_GCF_002632825.1	d__Bacteria	p__Proteobacteria	c__Gammaproteobacteria	o__Enterobacterales	f__Enterobacteriaceae	g__Xenorhabdus	s__Xenorhabdus stockiae	3	0	0	0	0	0	0	0	3
GB_GCA_002469605.1	d__Bacteria	p__Proteobacteria	c__Gammaproteobacteria	o__Enterobacterales	f__Enterobacteriaceae	g__Leclercia	s__Leclercia sp002469605	3	0	0	0	0	0	0	0	3
GB_GCA_000961725.1	d__Bacteria	p__Desulfobacterota	c__Desulfobulbia	o__Desulfobulbales	f__Desulfocapsaceae	g__Desulforhopalus	s__Desulforhopalus sp000961725	2	0	0	0	0	0	1	0	3
RS_GCF_900220975.1	d__Bacteria	p__Proteobacteria	c__Alphaproteobacteria	o__Rhizobiales	f__Rhizobiaceae	g__Mycoplana	s__Mycoplana subbaraonis	3	0	0	0	0	0	0	0	3
RS_GCF_001522585.2	d__Bacteria	p__Proteobacteria	c__Gammaproteobacteria	o__Burkholderiales	f__Burkholderiaceae	g__Burkholderia	s__Burkholderia sp001522585	3	0	0	0	0	0	0	0	3
RS_GCF_002091675.1	d__Bacteria	p__Proteobacteria	c__Gammaproteobacteria	o__Pseudomonadales	f__Pseudomonadaceae	g__Pseudomonas_B	s__Pseudomonas_B luteola	3	0	0	0	0	0	0	0	3
GB_GCA_002083565.1	d__Bacteria	p__Nitrospirota	c__Nitrospiria	o__Nitrospirales	f__Nitrospiraceae	g__Nitrospira	s__Nitrospira sp002083565	1	0	0	0	0	0	0	2	3
RS_GCF_001996005.1	d__Bacteria	p__Proteobacteria	c__Gammaproteobacteria	o__Enterobacterales	f__Vibrionaceae	g__Salinivibrio	s__Salinivibrio siamensis	3	0	0	0	0	0	0	0	3
RS_GCF_002285795.1	d__Bacteria	p__Actinobacteriota	c__Actinobacteria	o__Mycobacteriales	f__Micromonosporaceae	g__Micromonospora_F	s__Micromonospora_F sp002285795	3	0	0	0	0	0	0	0	3
RS_GCF_900090285.1	d__Bacteria	p__Actinobacteriota	c__Actinobacteria	o__Mycobacteriales	f__Micromonosporaceae	g__Micromonospora	s__Micromonospora inositola	2	0	1	0	0	0	0	0	3
GB_GCA_002419935.1	d__Bacteria	p__Proteobacteria	c__Gammaproteobacteria	o__Enterobacterales	f__Enterobacteriaceae	g__Pantoea	s__Pantoea sp002419935	3	0	0	0	0	0	0	0	3
RS_GCF_001908105.1	d__Bacteria	p__Proteobacteria	c__Gammaproteobacteria	o__Enterobacterales	f__Enterobacteriaceae	g__Xenorhabdus	s__Xenorhabdus eapokensis	3	0	0	0	0	0	0	0	3
RS_GCF_002027705.1	d__Bacteria	p__Firmicutes_I	c__Bacilli_A	o__Paenibacillales	f__Paenibacillaceae	g__Paenibacillus_E	s__Paenibacillus_E ferrarius	1	0	0	2	0	0	0	0	3
RS_GCF_000813125.1	d__Bacteria	p__Firmicutes	c__Bacilli	o__Bacillales	f__Bacillaceae_A	g__Bacillus_Y	s__Bacillus_Y selenatarsenatis	1	0	0	2	0	0	0	0	3
RS_GCF_001942255.1	d__Bacteria	p__Actinobacteriota	c__Actinobacteria	o__Streptosporangiales	f__Streptosporangiaceae	g__Nocardiopsis	s__Nocardiopsis sp001942255	3	0	0	0	0	0	0	0	3
RS_GCF_002153425.1	d__Bacteria	p__Firmicutes	c__Bacilli	o__Bacillales	f__Salisediminibacteriaceae	g__Bacillus_AR	s__Bacillus_AR alkalitelluris	1	0	0	2	0	0	0	0	3
RS_GCF_000217935.1	d__Bacteria	p__Proteobacteria	c__Gammaproteobacteria	o__Enterobacterales	f__Alteromonadaceae	g__Pararheinheimera	s__Pararheinheimera sp000217935	3	0	0	0	0	0	0	0	3
GB_GCA_003456605.1	d__Bacteria	p__Nitrospirota	c__Nitrospiria	o__Nitrospirales	f__Nitrospiraceae	g__Nitrospira_A	s__Nitrospira_A sp003456605	1	0	0	0	0	0	0	2	3
GB_GCA_001263205.1	d__Bacteria	p__Myxococcota	c__Polyangia	o__Polyangiales	f__Polyangiaceae	g__Labilithrix	s__Labilithrix luteola	2	0	0	0	0	0	1	0	3
RS_GCF_000463115.2	d__Bacteria	p__Proteobacteria	c__Gammaproteobacteria	o__Enterobacterales	f__Enterobacteriaceae	g__Franconibacter	s__Franconibacter helveticus	3	0	0	0	0	0	0	0	3
GB_GCA_002434205.1	d__Bacteria	p__Proteobacteria	c__Gammaproteobacteria	o__Enterobacterales	f__Enterobacteriaceae	g__Pantoea	s__Pantoea sp002434205	3	0	0	0	0	0	0	0	3
RS_GCF_001718955.1	d__Bacteria	p__Proteobacteria	c__Gammaproteobacteria	o__Burkholderiales	f__Burkholderiaceae	g__Burkholderia	s__Burkholderia stagnalis	3	0	0	0	0	0	0	0	3
RS_GCF_000454545.1	d__Bacteria	p__Proteobacteria	c__Gammaproteobacteria	o__Xanthomonadales	f__Xanthomonadaceae	g__Xanthomonas	s__Xanthomonas cassavae	3	0	0	0	0	0	0	0	3
RS_GCF_000751755.1	d__Bacteria	p__Proteobacteria	c__Gammaproteobacteria	o__Enterobacterales	f__Enterobacteriaceae	g__Klebsiella	s__Klebsiella quasipneumoniae	3	0	0	0	0	0	0	0	3
RS_GCF_000016185.1	d__Bacteria	p__Proteobacteria	c__Alphaproteobacteria	o__Azospirillales	f__Azospirillaceae	g__Rhodospirillum_A	s__Rhodospirillum_A centenum	3	0	0	0	0	0	0	0	3
RS_GCF_000801955.1	d__Bacteria	p__Proteobacteria	c__Gammaproteobacteria	o__Burkholderiales	f__Burkholderiaceae	g__Ralstonia	s__Ralstonia sp000801955	3	0	0	0	0	0	0	0	3
RS_GCF_000701165.1	d__Bacteria	p__Proteobacteria	c__Gammaproteobacteria	o__Burkholderiales	f__Burkholderiaceae	g__Burkholderia	s__Burkholderia cepacia_A	3	0	0	0	0	0	0	0	3
RS_GCF_000832805.1	d__Bacteria	p__Firmicutes	c__Bacilli	o__Bacillales	f__Bacillaceae_G	g__Bacillus_A	s__Bacillus_A cereus_T	2	0	0	1	0	0	0	0	3
RS_GCF_900184035.1	d__Bacteria	p__Proteobacteria	c__Gammaproteobacteria	o__Enterobacterales	f__Enterobacteriaceae	g__Kosakonia	s__Kosakonia pseudosacchari	3	0	0	0	0	0	0	0	3
RS_GCF_000468095.1	d__Bacteria	p__Proteobacteria	c__Gammaproteobacteria	o__Enterobacterales	f__Enterobacteriaceae	g__Pantoea	s__Pantoea sp000468095	3	0	0	0	0	0	0	0	3
RS_GCF_002939865.1	d__Bacteria	p__Proteobacteria	c__Gammaproteobacteria	o__Xanthomonadales	f__Xanthomonadaceae	g__Xanthomonas	s__Xanthomonas dyei	3	0	0	0	0	0	0	0	3
RS_GCF_000732615.1	d__Bacteria	p__Proteobacteria	c__Gammaproteobacteria	o__Burkholderiales	f__Burkholderiaceae	g__Burkholderia	s__Burkholderia paludis	3	0	0	0	0	0	0	0	3
RS_GCF_900105845.1	d__Bacteria	p__Proteobacteria	c__Alphaproteobacteria	o__Rhizobiales	f__Xanthobacteraceae	g__Bradyrhizobium	s__Bradyrhizobium erythrophlei_E	3	0	0	0	0	0	0	0	3
GB_GCA_003261555.1	d__Bacteria	p__Proteobacteria	c__Gammaproteobacteria	o__Enterobacterales	f__Enterobacteriaceae	g__Klebsiella_A	s__Klebsiella_A grimontii	3	0	0	0	0	0	0	0	3
RS_GCF_002831585.1	d__Bacteria	p__Proteobacteria	c__Alphaproteobacteria	o__Rhizobiales	f__Xanthobacteraceae	g__Bradyrhizobium	s__Bradyrhizobium sp002831585	3	0	0	0	0	0	0	0	3
RS_GCF_002112345.1	d__Bacteria	p__Proteobacteria	c__Gammaproteobacteria	o__Pseudomonadales	f__Pseudomonadaceae	g__Pseudomonas_E	s__Pseudomonas_E sp002112345	3	0	0	0	0	0	0	0	3
RS_GCF_900167045.1	d__Bacteria	p__Proteobacteria	c__Gammaproteobacteria	o__Legionellales	f__Legionellaceae	g__Tatlockia	s__Tatlockia maceachernii	3	0	0	0	0	0	0	0	3
RS_GCF_000175935.2	d__Bacteria	p__Proteobacteria	c__Gammaproteobacteria	o__Enterobacterales	f__Enterobacteriaceae	g__Pantoea	s__Pantoea sp000175935	3	0	0	0	0	0	0	0	3
RS_GCF_900185905.1	d__Bacteria	p__Proteobacteria	c__Gammaproteobacteria	o__Enterobacterales	f__Enterobacteriaceae	g__Enterobacter	s__Enterobacter cancerogenus	3	0	0	0	0	0	0	0	3
RS_GCF_000493015.1	d__Bacteria	p__Proteobacteria	c__Gammaproteobacteria	o__Enterobacterales	f__Enterobacteriaceae	g__Enterobacter	s__Enterobacter sp000493015	3	0	0	0	0	0	0	0	3
RS_GCF_000181835.1	d__Bacteria	p__Firmicutes	c__Bacilli	o__Bacillales	f__Bacillaceae_G	g__Bacillus_A	s__Bacillus_A anthracis	2	0	0	1	0	0	0	0	3
RS_GCF_002903155.1	d__Bacteria	p__Firmicutes_E	c__Sulfobacillia	o__Sulfobacillales	f__Sulfobacillaceae	g__Sulfobacillus	s__Sulfobacillus sp002903155	3	0	0	0	0	0	0	0	3
RS_GCF_002632445.1	d__Bacteria	p__Proteobacteria	c__Gammaproteobacteria	o__Enterobacterales	f__Enterobacteriaceae	g__Xenorhabdus	s__Xenorhabdus ehlersii	3	0	0	0	0	0	0	0	3
RS_GCF_000472545.1	d__Bacteria	p__Proteobacteria	c__Gammaproteobacteria	o__Burkholderiales	f__Burkholderiaceae	g__Paraburkholderia	s__Paraburkholderia sp000472545	3	0	0	0	0	0	0	0	3
RS_GCF_003269035.1	d__Bacteria	p__Proteobacteria	c__Gammaproteobacteria	o__Burkholderiales	f__Burkholderiaceae	g__Paraburkholderia	s__Paraburkholderia bryophila	3	0	0	0	0	0	0	0	3
RS_GCF_000255535.1	d__Bacteria	p__Proteobacteria	c__Gammaproteobacteria	o__Enterobacterales	f__Enterobacteriaceae	g__Rahnella	s__Rahnella aquatilis_B	3	0	0	0	0	0	0	0	3
RS_GCF_002009015.1	d__Bacteria	p__Proteobacteria	c__Gammaproteobacteria	o__Pseudomonadales	f__Cellvibrionaceae	g__Microbulbifer	s__Microbulbifer mangrovi	3	0	0	0	0	0	0	0	3
RS_GCF_000006945.2	d__Bacteria	p__Proteobacteria	c__Gammaproteobacteria	o__Enterobacterales	f__Enterobacteriaceae	g__Salmonella	s__Salmonella enterica	3	0	0	0	0	0	0	0	3
GB_GCA_000307955.1	d__Bacteria	p__Desulfobacterota_A	c__Desulfovibrionia	o__Desulfovibrionales	f__Desulfovibrionaceae	g__Desulfovibrio_F	s__Desulfovibrio_F magneticus_A	2	0	0	0	0	0	1	0	3
GB_GCA_003509765.1	d__Bacteria	p__Proteobacteria	c__Gammaproteobacteria	o__Burkholderiales	f__Burkholderiaceae	g__Hydrogenophaga	s__Hydrogenophaga sp003509765	2	0	0	0	0	0	1	0	3
GB_GCA_003263515.1	d__Bacteria	p__Proteobacteria	c__Gammaproteobacteria	o__Enterobacterales	f__Enterobacteriaceae	g__Rahnella	s__Rahnella sp003263515	3	0	0	0	0	0	0	0	3
GB_GCA_003263545.1	d__Bacteria	p__Proteobacteria	c__Gammaproteobacteria	o__Enterobacterales	f__Enterobacteriaceae	g__Rahnella	s__Rahnella sp003263545	3	0	0	0	0	0	0	0	3
RS_GCF_002006755.1	d__Bacteria	p__Proteobacteria	c__Gammaproteobacteria	o__Cardiobacteriales	f__Wohlfahrtiimonadaceae	g__Wohlfahrtiimonas	s__Wohlfahrtiimonas larvae	3	0	0	0	0	0	0	0	3
GB_GCA_001686385.1	d__Bacteria	p__Proteobacteria	c__Gammaproteobacteria	o__Enterobacterales	f__Enterobacteriaceae	g__Citrobacter	s__Citrobacter freundii_A	3	0	0	0	0	0	0	0	3
GB_GCA_002277815.1	d__Bacteria	p__Proteobacteria	c__Gammaproteobacteria	o__Pseudomonadales	f__Pseudomonadaceae	g__Pseudomonas_E	s__Pseudomonas_E sp002277815	3	0	0	0	0	0	0	0	3
RS_GCF_002973525.1	d__Bacteria	p__Proteobacteria	c__Gammaproteobacteria	o__Burkholderiales	f__Burkholderiaceae	g__Paraburkholderia	s__Paraburkholderia sp002973525	3	0	0	0	0	0	0	0	3
RS_GCF_000712595.1	d__Bacteria	p__Firmicutes	c__Bacilli	o__Bacillales	f__Bacillaceae_G	g__Bacillus_A	s__Bacillus_A manliponensis	2	0	0	1	0	0	0	0	3
RS_GCF_000368925.1	d__Bacteria	p__Proteobacteria	c__Gammaproteobacteria	o__Pseudomonadales	f__Moraxellaceae	g__Acinetobacter	s__Acinetobacter bereziniae	3	0	0	0	0	0	0	0	3
RS_GCF_000818195.1	d__Bacteria	p__Actinobacteriota	c__Actinobacteria	o__Streptomycetales	f__Streptomycetaceae	g__Streptomyces	s__Streptomyces sp000818195	2	0	1	0	0	0	0	0	3
RS_GCF_001422575.1	d__Bacteria	p__Proteobacteria	c__Gammaproteobacteria	o__Enterobacterales	f__Enterobacteriaceae	g__Rahnella	s__Rahnella sp001422575	3	0	0	0	0	0	0	0	3
RS_GCF_002567495.1	d__Bacteria	p__Firmicutes	c__Bacilli	o__Bacillales	f__Bacillaceae_G	g__Bacillus_A	s__Bacillus_A cereus_AQ	2	0	0	1	0	0	0	0	3
RS_GCF_900100495.1	d__Bacteria	p__Proteobacteria	c__Gammaproteobacteria	o__Pseudomonadales	f__Pseudomonadaceae	g__Pseudomonas_E	s__Pseudomonas_E benzenivorans	3	0	0	0	0	0	0	0	3
RS_GCF_000762975.1	d__Bacteria	p__Proteobacteria	c__Gammaproteobacteria	o__Enterobacterales	f__Enterobacteriaceae	g__Enterobacter	s__Enterobacter sp000762975	3	0	0	0	0	0	0	0	3
RS_GCF_001679645.1	d__Bacteria	p__Proteobacteria	c__Gammaproteobacteria	o__Pseudomonadales	f__Pseudomonadaceae	g__Pseudomonas_E	s__Pseudomonas_E fluorescens_K	3	0	0	0	0	0	0	0	3
RS_GCF_001590925.1	d__Bacteria	p__Proteobacteria	c__Gammaproteobacteria	o__Enterobacterales	f__Enterobacteriaceae	g__Serratia	s__Serratia plymuthica	3	0	0	0	0	0	0	0	3
RS_GCF_900166575.1	d__Bacteria	p__Firmicutes	c__Bacilli	o__Bacillales	f__Halobacillaceae	g__Halobacillus	s__Halobacillus salinus	1	0	0	2	0	0	0	0	3
RS_GCF_000016325.1	d__Bacteria	p__Proteobacteria	c__Gammaproteobacteria	o__Enterobacterales	f__Enterobacteriaceae	g__Lelliottia	s__Lelliottia sp000016325	3	0	0	0	0	0	0	0	3
RS_GCF_900406815.1	d__Bacteria	p__Proteobacteria	c__Gammaproteobacteria	o__Pseudomonadales	f__Moraxellaceae	g__Acinetobacter	s__Acinetobacter haemolyticus_A	3	0	0	0	0	0	0	0	3
RS_GCF_000519205.1	d__Bacteria	p__Actinobacteriota	c__Actinobacteria	o__Mycobacteriales	f__Pseudonocardiaceae	g__Amycolatopsis	s__Amycolatopsis taiwanensis	2	0	1	0	0	0	0	0	3
RS_GCF_002804065.1	d__Bacteria	p__Firmicutes_K	c__Alicyclobacillia	o__Kyrpidiales	f__Kyrpidiaceae	g__Kyrpidia	s__Kyrpidia sp002804065	1	0	0	1	0	0	1	0	3
RS_GCF_900055185.1	d__Bacteria	p__Proteobacteria	c__Gammaproteobacteria	o__Enterobacterales	f__Vibrionaceae	g__Grimontia	s__Grimontia celer	3	0	0	0	0	0	0	0	3
RS_GCF_000013365.1	d__Bacteria	p__Proteobacteria	c__Alphaproteobacteria	o__Rhizobiales	f__Xanthobacteraceae	g__Rhodopseudomonas	s__Rhodopseudomonas palustris_J	3	0	0	0	0	0	0	0	3
RS_GCF_001277345.1	d__Bacteria	p__Firmicutes_I	c__Bacilli_A	o__Paenibacillales	f__Paenibacillaceae	g__Paenibacillus	s__Paenibacillus solani	1	0	0	2	0	0	0	0	3
RS_GCF_001277255.1	d__Bacteria	p__Proteobacteria	c__Gammaproteobacteria	o__Enterobacterales	f__Enterobacteriaceae	g__Cronobacter	s__Cronobacter condimenti	3	0	0	0	0	0	0	0	3
RS_GCF_002095475.1	d__Bacteria	p__Proteobacteria	c__Gammaproteobacteria	o__Enterobacterales	f__Enterobacteriaceae	g__Pantoea	s__Pantoea rwandensis	3	0	0	0	0	0	0	0	3
RS_GCF_001422605.1	d__Bacteria	p__Proteobacteria	c__Gammaproteobacteria	o__Enterobacterales	f__Enterobacteriaceae	g__Erwinia	s__Erwinia sp001422605	3	0	0	0	0	0	0	0	3
GB_GCA_000935965.1	d__Bacteria	p__Firmicutes	c__Bacilli	o__Bacillales_A	f__Planococcaceae	g__Lysinibacillus_E	s__Lysinibacillus_E saudimassiliensis	1	0	0	1	0	0	1	0	3
RS_GCF_002077695.1	d__Bacteria	p__Proteobacteria	c__Gammaproteobacteria	o__Enterobacterales	f__Enterobacteriaceae	g__Pantoea	s__Pantoea latae	3	0	0	0	0	0	0	0	3
GB_GCA_002281295.1	d__Bacteria	p__Proteobacteria	c__Gammaproteobacteria	o__Halothiobacillales	f__Halothiobacillaceae	g__Halothiobacillus	s__Halothiobacillus sp002281295	2	0	0	0	0	0	1	0	3
RS_GCF_900095775.1	d__Bacteria	p__Firmicutes_I	c__Bacilli_A	o__Paenibacillales	f__Paenibacillaceae	g__Paenibacillus	s__Paenibacillus amylolyticus_B	1	0	0	2	0	0	0	0	3
RS_GCF_000959725.1	d__Bacteria	p__Proteobacteria	c__Gammaproteobacteria	o__Burkholderiales	f__Burkholderiaceae	g__Burkholderia	s__Burkholderia gladioli	3	0	0	0	0	0	0	0	3
RS_GCF_000341185.1	d__Bacteria	p__Actinobacteriota	c__Actinobacteria	o__Streptosporangiales	f__Streptosporangiaceae	g__Nocardiopsis_A	s__Nocardiopsis_A chromatogenes	3	0	0	0	0	0	0	0	3
RS_GCF_000420025.1	d__Bacteria	p__Actinobacteriota	c__Thermoleophilia	o__Solirubrobacterales	f__Solirubrobacteraceae	g__Patulibacter	s__Patulibacter americanus	2	0	1	0	0	0	0	0	3
RS_GCF_001028665.1	d__Bacteria	p__Proteobacteria	c__Gammaproteobacteria	o__Burkholderiales	f__Burkholderiaceae	g__Burkholderia	s__Burkholderia pyrrocinia	3	0	0	0	0	0	0	0	3
RS_GCF_000444875.1	d__Bacteria	p__Actinobacteriota	c__Actinobacteria	o__Streptomycetales	f__Streptomycetaceae	g__Streptomyces	s__Streptomyces collinus	1	0	2	0	0	0	0	0	3
RS_GCF_003260285.1	d__Bacteria	p__Proteobacteria	c__Gammaproteobacteria	o__Nevskiales	f__Salinisphaeraceae	g__Salinisphaera_A	s__Salinisphaera_A halophila	3	0	0	0	0	0	0	0	3
GB_GCA_001552515.1	d__Bacteria	p__Actinobacteriota	c__Actinobacteria	o__Streptosporangiales	f__Streptosporangiaceae	g__Sphaerimonospora	s__Sphaerimonospora mesophila	2	0	1	0	0	0	0	0	3
RS_GCF_000429945.1	d__Bacteria	p__Desulfobacterota	c__Desulfobulbia	o__Desulfobulbales	f__Desulfobulbaceae	g__Desulfobulbus_A	s__Desulfobulbus_A japonicus	1	0	0	0	0	0	2	0	3
RS_GCF_002909875.1	d__Bacteria	p__Proteobacteria	c__Gammaproteobacteria	o__Pseudomonadales	f__Pseudomonadaceae	g__Pseudomonas_E	s__Pseudomonas_E sp002909875	3	0	0	0	0	0	0	0	3
RS_GCF_000402035.1	d__Bacteria	p__Proteobacteria	c__Gammaproteobacteria	o__Burkholderiales	f__Burkholderiaceae	g__Caballeronia	s__Caballeronia insecticola	3	0	0	0	0	0	0	0	3
RS_GCF_001022135.1	d__Bacteria	p__Proteobacteria	c__Gammaproteobacteria	o__Enterobacterales	f__Enterobacteriaceae	g__Metakosakonia	s__Metakosakonia intermedia	3	0	0	0	0	0	0	0	3
RS_GCF_000400365.1	d__Bacteria	p__Proteobacteria	c__Gammaproteobacteria	o__Enterobacterales	f__Vibrionaceae	g__Vibrio	s__Vibrio jasicida	3	0	0	0	0	0	0	0	3
RS_GCF_000425125.1	d__Bacteria	p__Firmicutes_I	c__Bacilli_A	o__Paenibacillales	f__Paenibacillaceae	g__Paenibacillus_B	s__Paenibacillus_B taiwanensis	1	0	0	2	0	0	0	0	3
GB_GCA_001804915.1	d__Bacteria	p__Nitrospinota	c__UBA9942	o__UBA9942	f__UBA9942	g__PLOWO2-12-39-15	s__PLOWO2-12-39-15 sp001804915	0	0	0	0	0	0	0	3	3
RS_GCF_002582595.1	d__Bacteria	p__Firmicutes	c__Bacilli	o__Bacillales	f__Bacillaceae_G	g__Bacillus_A	s__Bacillus_A cereus_AY	2	0	0	1	0	0	0	0	3
RS_GCF_000719555.1	d__Bacteria	p__Actinobacteriota	c__Actinobacteria	o__Streptomycetales	f__Streptomycetaceae	g__Streptomyces	s__Streptomyces sp000719555	3	0	0	0	0	0	0	0	3
RS_GCF_001418225.1	d__Bacteria	p__Proteobacteria	c__Alphaproteobacteria	o__Rhizobiales	f__Stappiaceae	g__Pannonibacter	s__Pannonibacter indicus	2	0	0	0	0	0	1	0	3
RS_GCF_001552175.1	d__Bacteria	p__Actinobacteriota	c__Actinobacteria	o__Streptosporangiales	f__Streptosporangiaceae	g__Spirillospora	s__Spirillospora kijaniata	1	0	2	0	0	0	0	0	3
RS_GCF_001570605.1	d__Bacteria	p__Actinobacteriota	c__Actinobacteria	o__Streptosporangiales	f__Streptosporangiaceae	g__Herbidospora	s__Herbidospora cretacea	3	0	0	0	0	0	0	0	3
RS_GCF_900069005.1	d__Bacteria	p__Firmicutes_I	c__Bacilli_A	o__Paenibacillales	f__Paenibacillaceae	g__GM2	s__GM2 sp900069005	1	0	0	2	0	0	0	0	3
RS_GCF_900112555.1	d__Bacteria	p__Actinobacteriota	c__Actinobacteria	o__Mycobacteriales	f__Pseudonocardiaceae	g__Saccharopolyspora	s__Saccharopolyspora jiangxiensis	2	0	1	0	0	0	0	0	3
RS_GCF_000967495.1	d__Bacteria	p__Proteobacteria	c__Gammaproteobacteria	o__Enterobacterales	f__Vibrionaceae	g__Vibrio	s__Vibrio neptunius	3	0	0	0	0	0	0	0	3
RS_GCF_001298545.1	d__Bacteria	p__Actinobacteriota	c__Actinobacteria	o__Streptomycetales	f__Streptomycetaceae	g__Streptomyces	s__Streptomyces sp001298545	2	0	1	0	0	0	0	0	3
RS_GCF_000759795.1	d__Bacteria	p__Proteobacteria	c__Gammaproteobacteria	o__Enterobacterales	f__Enterobacteriaceae	g__Pseudescherichia	s__Pseudescherichia vulneris	3	0	0	0	0	0	0	0	3
RS_GCF_001742305.1	d__Bacteria	p__Firmicutes_J	c__Desulfuribacillia	o__Desulfuribacillales	f__Desulfuribacillaceae	g__Desulfuribacillus_A	s__Desulfuribacillus_A stibiiarsenatis	1	0	0	0	0	0	1	1	3
RS_GCF_900105945.1	d__Bacteria	p__Actinobacteriota	c__Actinobacteria	o__Mycobacteriales	f__Pseudonocardiaceae	g__Amycolatopsis	s__Amycolatopsis tolypomycina	3	0	0	0	0	0	0	0	3
RS_GCF_900086655.1	d__Bacteria	p__Firmicutes_I	c__Bacilli_A	o__Paenibacillales	f__Paenibacillaceae	g__Paenibacillus_U	s__Paenibacillus_U tuaregi	1	0	0	2	0	0	0	0	3
RS_GCF_000720475.1	d__Bacteria	p__Actinobacteriota	c__Actinobacteria	o__Streptomycetales	f__Streptomycetaceae	g__Streptomyces	s__Streptomyces aureocirculatus	3	0	0	0	0	0	0	0	3
RS_GCF_000621185.1	d__Bacteria	p__Proteobacteria	c__Gammaproteobacteria	o__Enterobacterales	f__Enterobacteriaceae	g__Franconibacter	s__Franconibacter pulveris	3	0	0	0	0	0	0	0	3
RS_GCF_900105415.1	d__Bacteria	p__Actinobacteriota	c__Actinobacteria	o__Streptomycetales	f__Streptomycetaceae	g__Streptomyces	s__Streptomyces sp900105415	2	0	1	0	0	0	0	0	3
RS_GCF_002099195.1	d__Bacteria	p__Proteobacteria	c__Gammaproteobacteria	o__Burkholderiales	f__Burkholderiaceae	g__Burkholderia	s__Burkholderia puraquae	3	0	0	0	0	0	0	0	3
RS_GCF_002257645.1	d__Bacteria	p__Firmicutes_I	c__Bacilli_A	o__Paenibacillales	f__Paenibacillaceae	g__Paenibacillus	s__Paenibacillus sp002257645	1	0	0	2	0	0	0	0	3
RS_GCF_001039005.1	d__Bacteria	p__Proteobacteria	c__Gammaproteobacteria	o__Burkholderiales	f__Burkholderiaceae	g__Burkholderia	s__Burkholderia cepacia_C	3	0	0	0	0	0	0	0	3
GB_GCA_001797495.1	d__Bacteria	p__GWC2-55-46	c__GWC2-55-46	o__GWC2-55-46	f__GWC2-42-11	g__GWC2-42-11	s__GWC2-42-11 sp001797495	0	0	0	0	0	0	0	3	3
RS_GCF_900089775.1	d__Bacteria	p__Proteobacteria	c__Gammaproteobacteria	o__Pseudomonadales	f__Marinomonadaceae	g__Marinomonas	s__Marinomonas spartinae	3	0	0	0	0	0	0	0	3
RS_GCF_000725805.1	d__Bacteria	p__Actinobacteriota	c__Actinobacteria	o__Streptomycetales	f__Streptomycetaceae	g__Streptomyces	s__Streptomyces xanthophaeus	2	0	1	0	0	0	0	0	3
RS_GCF_001307155.1	d__Bacteria	p__Proteobacteria	c__Gammaproteobacteria	o__Pseudomonadales	f__Pseudomonadaceae	g__Pseudomonas_E	s__Pseudomonas_E fluorescens_E	3	0	0	0	0	0	0	0	3
GB_GCA_002341825.1	d__Bacteria	p__Proteobacteria	c__Gammaproteobacteria	o__Acidithiobacillales	f__Acidithiobacillaceae	g__Acidithiobacillus	s__Acidithiobacillus sp002341825	3	0	0	0	0	0	0	0	3
RS_GCF_002953195.1	d__Bacteria	p__Proteobacteria	c__Gammaproteobacteria	o__Enterobacterales	f__Enterobacteriaceae	g__Pantoea_B	s__Pantoea_B gaviniae	3	0	0	0	0	0	0	0	3
RS_GCF_900101225.1	d__Bacteria	p__Firmicutes_I	c__Bacilli_A	o__Paenibacillales	f__Paenibacillaceae	g__Paenibacillus	s__Paenibacillus sp900101225	1	0	0	2	0	0	0	0	3
GB_GCA_003525525.1	d__Bacteria	p__Desulfobacterota_A	c__Desulfovibrionia	o__Desulfovibrionales	f__Desulfovibrionaceae	g__Desulfovibrio_F	s__Desulfovibrio_F sp003525525	2	0	0	0	0	0	1	0	3
RS_GCF_000488275.1	d__Bacteria	p__Proteobacteria	c__Gammaproteobacteria	o__Pseudomonadales	f__Moraxellaceae	g__Acinetobacter	s__Acinetobacter brisouii	3	0	0	0	0	0	0	0	3
RS_GCF_001975225.1	d__Bacteria	p__Proteobacteria	c__Gammaproteobacteria	o__Enterobacterales	f__Enterobacteriaceae	g__Kosakonia	s__Kosakonia cowanii	3	0	0	0	0	0	0	0	3
RS_GCF_001955855.1	d__Bacteria	p__Firmicutes_I	c__Bacilli_A	o__Paenibacillales	f__Paenibacillaceae	g__Paenibacillus	s__Paenibacillus sp001955855	1	0	0	2	0	0	0	0	3
RS_GCF_900102685.1	d__Bacteria	p__Firmicutes_I	c__Bacilli_A	o__Thermoactinomycetales	f__Thermoactinomycetaceae	g__Melghirimyces	s__Melghirimyces thermohalophilus	1	0	0	2	0	0	0	0	3
RS_GCF_003144375.1	d__Bacteria	p__Proteobacteria	c__Gammaproteobacteria	o__Enterobacterales	f__Enterobacteriaceae	g__Proteus	s__Proteus sp003144375	3	0	0	0	0	0	0	0	3
RS_GCF_000377505.1	d__Bacteria	p__Firmicutes_I	c__Bacilli_A	o__Paenibacillales	f__Paenibacillaceae	g__Paenibacillus	s__Paenibacillus massiliensis	1	0	0	2	0	0	0	0	3
RS_GCF_002155975.1	d__Bacteria	p__Actinobacteriota	c__Actinobacteria	o__Mycobacteriales	f__Pseudonocardiaceae	g__Amycolatopsis	s__Amycolatopsis kentuckyensis	3	0	0	0	0	0	0	0	3
RS_GCF_900113825.1	d__Bacteria	p__Proteobacteria	c__Gammaproteobacteria	o__Burkholderiales	f__Burkholderiaceae	g__Paraburkholderia	s__Paraburkholderia megapolitana	3	0	0	0	0	0	0	0	3
RS_GCF_001467035.1	d__Bacteria	p__Proteobacteria	c__Gammaproteobacteria	o__Legionellales	f__Legionellaceae	g__Legionella	s__Legionella cherrii	3	0	0	0	0	0	0	0	3
RS_GCF_003013775.1	d__Bacteria	p__Actinobacteriota	c__Actinobacteria	o__Mycobacteriales	f__Micromonosporaceae	g__Micromonospora	s__Micromonospora sp003013775	2	0	1	0	0	0	0	0	3
RS_GCF_001989355.1	d__Bacteria	p__Firmicutes	c__Bacilli	o__Bacillales	f__Bacillaceae_C	g__Bacillus_AM	s__Bacillus_AM sp001989355	0	0	0	2	0	0	1	0	3
RS_GCF_002982115.1	d__Bacteria	p__Firmicutes	c__Bacilli	o__Bacillales_A	f__Planococcaceae	g__Lysinibacillus	s__Lysinibacillus sphaericus	0	0	0	2	0	0	1	0	3
RS_GCF_900108335.1	d__Bacteria	p__Actinobacteriota	c__Actinobacteria	o__Streptosporangiales	f__Streptosporangiaceae	g__Nonomuraea	s__Nonomuraea solani	3	0	0	0	0	0	0	0	3
RS_GCF_002072125.1	d__Bacteria	p__Proteobacteria	c__Gammaproteobacteria	o__Enterobacterales	f__Enterobacteriaceae	g__Enterobacter	s__Enterobacter cancerogenus_A	3	0	0	0	0	0	0	0	3
RS_GCF_000239815.1	d__Bacteria	p__Proteobacteria	c__Alphaproteobacteria	o__Rhizobiales	f__Xanthobacteraceae	g__Bradyrhizobium	s__Bradyrhizobium sp000239815	3	0	0	0	0	0	0	0	3
GB_GCA_900470925.1	d__Bacteria	p__Proteobacteria	c__Alphaproteobacteria	o__Rhizobiales	f__Rhizobiaceae	g__Phyllobacterium	s__Phyllobacterium sp900470925	3	0	0	0	0	0	0	0	3
GB_GCA_002414805.1	d__Bacteria	p__Fibrobacterota	c__Fibrobacteria	o__UBA5070	f__UBA5070	g__UBA5070	s__UBA5070 sp002414805	2	0	0	0	0	0	1	0	3
RS_GCF_000333655.1	d__Bacteria	p__Proteobacteria	c__Alphaproteobacteria	o__Rhizobiales	f__Beijerinckiaceae	g__Methylobacterium	s__Methylobacterium sp000333655	3	0	0	0	0	0	0	0	3
GB_GCA_002331335.1	d__Bacteria	p__Nitrospirota	c__Nitrospiria	o__Nitrospirales	f__Nitrospiraceae	g__Nitrospira	s__Nitrospira sp002331335	0	0	0	0	0	0	0	3	3
RS_GCF_001905665.1	d__Bacteria	p__Actinobacteriota	c__Actinobacteria	o__Streptomycetales	f__Streptomycetaceae	g__Streptomyces	s__Streptomyces sp001905665	2	0	1	0	0	0	0	0	3
RS_GCF_001583695.1	d__Bacteria	p__Firmicutes	c__Bacilli	o__Bacillales	f__Bacillaceae_G	g__Bacillus_A	s__Bacillus_A wiedmannii	2	0	0	1	0	0	0	0	3
RS_GCF_003289275.1	d__Bacteria	p__Proteobacteria	c__Gammaproteobacteria	o__Enterobacterales	f__Enterobacteriaceae	g__Enterobacter	s__Enterobacter cloacae_K	3	0	0	0	0	0	0	0	3
RS_GCF_000702665.1	d__Bacteria	p__Desulfobacterota_A	c__Desulfovibrionia	o__Desulfovibrionales	f__Desulfovibrionaceae	g__Desulfovibrio_F	s__Desulfovibrio_F alcoholivorans	2	0	0	0	0	0	1	0	3
RS_GCF_000253295.1	d__Bacteria	p__Proteobacteria	c__Alphaproteobacteria	o__Rhizobiales	f__Hyphomicrobiaceae	g__Hyphomicrobium	s__Hyphomicrobium sp000253295	2	0	0	0	0	0	1	0	3
RS_GCF_003046225.1	d__Bacteria	p__Proteobacteria	c__Gammaproteobacteria	o__Enterobacterales	f__Enterobacteriaceae	g__Enterobacter	s__Enterobacter cloacae_I	3	0	0	0	0	0	0	0	3
RS_GCF_001598695.1	d__Bacteria	p__Proteobacteria	c__Gammaproteobacteria	o__Enterobacterales	f__Enterobacteriaceae	g__Klebsiella_A	s__Klebsiella_A oxytoca	3	0	0	0	0	0	0	0	3
RS_GCF_002846625.1	d__Bacteria	p__Actinobacteriota	c__Actinobacteria	o__Streptomycetales	f__Streptomycetaceae	g__Streptomyces	s__Streptomyces sp002846625	2	0	1	0	0	0	0	0	3
RS_GCF_001942465.1	d__Bacteria	p__Actinobacteriota	c__Actinobacteria	o__Streptosporangiales	f__Streptosporangiaceae	g__Spirillospora	s__Spirillospora sp001942465	3	0	0	0	0	0	0	0	3
RS_GCF_001922345.1	d__Bacteria	p__Proteobacteria	c__Gammaproteobacteria	o__Burkholderiales	f__Burkholderiaceae	g__Paraburkholderia_A	s__Paraburkholderia_A sp001922345	3	0	0	0	0	0	0	0	3
RS_GCF_000742135.1	d__Bacteria	p__Proteobacteria	c__Gammaproteobacteria	o__Enterobacterales	f__Enterobacteriaceae	g__Klebsiella	s__Klebsiella pneumoniae	3	0	0	0	0	0	0	0	3
RS_GCF_000295735.1	d__Bacteria	p__Proteobacteria	c__Gammaproteobacteria	o__Xanthomonadales	f__Xanthomonadaceae	g__Stenotrophomonas	s__Stenotrophomonas maltophilia_AO	3	0	0	0	0	0	0	0	3
RS_GCF_900091465.1	d__Bacteria	p__Actinobacteriota	c__Actinobacteria	o__Mycobacteriales	f__Micromonosporaceae	g__Micromonospora	s__Micromonospora rhizosphaerae	2	0	1	0	0	0	0	0	3
RS_GCF_002571225.1	d__Bacteria	p__Firmicutes	c__Bacilli	o__Bacillales	f__Bacillaceae_G	g__Bacillus_A	s__Bacillus_A sp002571225	2	0	0	1	0	0	0	0	3
RS_GCF_000719775.1	d__Bacteria	p__Actinobacteriota	c__Actinobacteria	o__Streptomycetales	f__Streptomycetaceae	g__Streptomyces	s__Streptomyces sp000719775	2	0	1	0	0	0	0	0	3
RS_GCF_002564555.1	d__Bacteria	p__Firmicutes	c__Bacilli	o__Bacillales	f__Bacillaceae_G	g__Bacillus_A	s__Bacillus_A cereus_K	2	0	0	1	0	0	0	0	3
RS_GCF_003201975.1	d__Bacteria	p__Firmicutes	c__Bacilli	o__Bacillales	f__Amphibacillaceae	g__Pseudogracilibacillus	s__Pseudogracilibacillus auburnensis	1	0	0	1	0	0	1	0	3
RS_GCF_003061005.1	d__Bacteria	p__Proteobacteria	c__Gammaproteobacteria	o__Pseudomonadales	f__Pseudomonadaceae	g__Pseudomonas_E	s__Pseudomonas_E sp003061005	3	0	0	0	0	0	0	0	3
RS_GCF_001570725.1	d__Bacteria	p__Firmicutes_I	c__Bacilli_A	o__Paenibacillales	f__Paenibacillaceae	g__Paenibacillus	s__Paenibacillus amylolyticus_A	1	0	0	2	0	0	0	0	3
RS_GCF_000759445.1	d__Bacteria	p__Proteobacteria	c__Gammaproteobacteria	o__Pseudomonadales	f__Pseudomonadaceae	g__Pseudomonas_E	s__Pseudomonas_E lutea	3	0	0	0	0	0	0	0	3
RS_GCF_000620225.1	d__Bacteria	p__Proteobacteria	c__Gammaproteobacteria	o__Burkholderiales	f__Burkholderiaceae	g__Variovorax	s__Variovorax sp000620225	3	0	0	0	0	0	0	0	3
RS_GCF_002749895.1	d__Bacteria	p__Proteobacteria	c__Gammaproteobacteria	o__Enterobacterales	f__Vibrionaceae	g__Vibrio	s__Vibrio fujianensis	3	0	0	0	0	0	0	0	3
RS_GCF_002097715.1	d__Bacteria	p__Proteobacteria	c__Gammaproteobacteria	o__Burkholderiales	f__Burkholderiaceae	g__Burkholderia	s__Burkholderia mesoacidophila	3	0	0	0	0	0	0	0	3
GB_GCA_002281735.1	d__Bacteria	p__Proteobacteria	c__Gammaproteobacteria	o__Halothiobacillales	f__Halothiobacillaceae	g__28-57-27	s__28-57-27 sp002281735	1	0	0	0	0	0	2	0	3
RS_GCF_001418205.1	d__Bacteria	p__Proteobacteria	c__Gammaproteobacteria	o__Pseudomonadales	f__Marinomonadaceae	g__Marinomonas	s__Marinomonas fungiae	3	0	0	0	0	0	0	0	3
RS_GCF_000333895.2	d__Bacteria	p__Proteobacteria	c__Gammaproteobacteria	o__Enterobacterales	f__Vibrionaceae	g__Grimontia	s__Grimontia indica	3	0	0	0	0	0	0	0	3
RS_GCF_000321045.1	d__Bacteria	p__Proteobacteria	c__Gammaproteobacteria	o__Enterobacterales	f__Enterobacteriaceae	g__Metakosakonia	s__Metakosakonia massiliensis	3	0	0	0	0	0	0	0	3
RS_GCF_000369525.1	d__Bacteria	p__Proteobacteria	c__Gammaproteobacteria	o__Pseudomonadales	f__Moraxellaceae	g__Acinetobacter	s__Acinetobacter sp000369525	3	0	0	0	0	0	0	0	3
RS_GCF_000739775.1	d__Bacteria	p__Proteobacteria	c__Gammaproteobacteria	o__Burkholderiales	f__Burkholderiaceae	g__Paraburkholderia_B	s__Paraburkholderia_B heleia	3	0	0	0	0	0	0	0	3
RS_GCF_001913135.1	d__Bacteria	p__Proteobacteria	c__Gammaproteobacteria	o__Pseudomonadales	f__Pseudomonadaceae	g__Pseudomonas_B	s__Pseudomonas_B psychrotolerans	3	0	0	0	0	0	0	0	3
RS_GCF_000876015.1	d__Bacteria	p__Proteobacteria	c__Gammaproteobacteria	o__Burkholderiales	f__Burkholderiaceae	g__Cupriavidus	s__Cupriavidus basilensis_B	3	0	0	0	0	0	0	0	3
RS_GCF_000519245.1	d__Bacteria	p__Proteobacteria	c__Gammaproteobacteria	o__Burkholderiales	f__Burkholderiaceae	g__Paraburkholderia_A	s__Paraburkholderia_A sp000519245	3	0	0	0	0	0	0	0	3
RS_GCF_000025565.1	d__Bacteria	p__Proteobacteria	c__Gammaproteobacteria	o__Enterobacterales	f__Enterobacteriaceae	g__Enterobacter	s__Enterobacter cloacae	3	0	0	0	0	0	0	0	3
RS_GCF_900129325.1	d__Bacteria	p__Proteobacteria	c__Alphaproteobacteria	o__Rhizobiales	f__Kaistiaceae	g__Kaistia	s__Kaistia soli	3	0	0	0	0	0	0	0	3
RS_GCF_000293805.1	d__Bacteria	p__Firmicutes_I	c__Bacilli_A	o__Paenibacillales	f__Paenibacillaceae	g__Paenibacillus_B	s__Paenibacillus_B alvei	2	0	0	1	0	0	0	0	3
RS_GCF_002577405.1	d__Bacteria	p__Firmicutes	c__Bacilli	o__Bacillales	f__Bacillaceae_G	g__Bacillus_A	s__Bacillus_A cereus_AU	2	0	0	1	0	0	0	0	3
RS_GCF_001728805.1	d__Bacteria	p__Firmicutes	c__Bacilli	o__Bacillales_A	f__Planococcaceae	g__Lysinibacillus	s__Lysinibacillus sphaericus_D	0	0	0	2	0	0	1	0	3
RS_GCF_000292915.1	d__Bacteria	p__Proteobacteria	c__Gammaproteobacteria	o__Burkholderiales	f__Burkholderiaceae	g__Burkholderia	s__Burkholderia cepacia_D	3	0	0	0	0	0	0	0	3
RS_GCF_001411805.1	d__Bacteria	p__Proteobacteria	c__Gammaproteobacteria	o__Burkholderiales	f__Burkholderiaceae	g__Burkholderia	s__Burkholderia plantarii	3	0	0	0	0	0	0	0	3
RS_GCF_001455345.1	d__Bacteria	p__Firmicutes	c__Bacilli	o__Bacillales	f__Bacillaceae_G	g__Bacillus_A	s__Bacillus_A thuringiensis_N	2	0	0	1	0	0	0	0	3
RS_GCF_000220335.1	d__Bacteria	p__Firmicutes	c__Bacilli	o__Bacillales_A	f__Planococcaceae	g__Sporosarcina	s__Sporosarcina newyorkensis	1	0	0	2	0	0	0	0	3
RS_GCF_001854245.1	d__Bacteria	p__Desulfobacterota	c__Desulfobacteria	o__Desulfobacterales	f__Desulfococcaceae	g__Desulfococcus	s__Desulfococcus multivorans	2	0	0	0	0	0	1	0	3
RS_GCF_003172935.1	d__Bacteria	p__Actinobacteriota	c__Actinobacteria	o__Mycobacteriales	f__Micromonosporaceae	g__Micromonospora	s__Micromonospora sp003172935	2	0	1	0	0	0	0	0	3
RS_GCF_002995495.1	d__Bacteria	p__Actinobacteriota	c__Actinobacteria	o__Streptosporangiales	f__Streptosporangiaceae	g__Actinocorallia	s__Actinocorallia populi	2	0	1	0	0	0	0	0	3
RS_GCF_000775615.1	d__Bacteria	p__Firmicutes	c__Bacilli	o__Bacillales	f__Halobacillaceae_A	g__Pontibacillus	s__Pontibacillus litoralis	1	0	0	2	0	0	0	0	3
RS_GCF_000746925.1	d__Bacteria	p__Firmicutes	c__Bacilli	o__Bacillales	f__Bacillaceae_G	g__Bacillus_A	s__Bacillus_A mycoides_A	2	0	0	1	0	0	0	0	3
RS_GCF_000725545.1	d__Bacteria	p__Actinobacteriota	c__Actinobacteria	o__Streptomycetales	f__Streptomycetaceae	g__Streptomyces	s__Streptomyces exfoliatus	2	0	1	0	0	0	0	0	3
RS_GCF_000336575.1	d__Bacteria	p__Proteobacteria	c__Gammaproteobacteria	o__Pseudomonadales	f__Halomonadaceae	g__Halomonas	s__Halomonas titanicae	3	0	0	0	0	0	0	0	3
RS_GCF_000632455.1	d__Bacteria	p__Proteobacteria	c__Gammaproteobacteria	o__Pseudomonadales	f__Moraxellaceae	g__Acinetobacter	s__Acinetobacter sp000632455	3	0	0	0	0	0	0	0	3
RS_GCF_002261155.1	d__Bacteria	p__Firmicutes	c__Bacilli	o__Bacillales	f__Domibacillaceae	g__FJAT-46582	s__FJAT-46582 sp002261155	1	0	0	1	0	0	1	0	3
RS_GCF_002799165.1	d__Bacteria	p__Proteobacteria	c__Gammaproteobacteria	o__Xanthomonadales	f__Xanthomonadaceae	g__Stenotrophomonas	s__Stenotrophomonas maltophilia_Q	3	0	0	0	0	0	0	0	3
RS_GCF_900106995.1	d__Bacteria	p__Actinobacteriota	c__Actinobacteria	o__Mycobacteriales	f__Pseudonocardiaceae	g__Saccharopolyspora	s__Saccharopolyspora shandongensis	3	0	0	0	0	0	0	0	3
RS_GCF_001187435.1	d__Bacteria	p__Actinobacteriota	c__Actinobacteria	o__Streptomycetales	f__Streptomycetaceae	g__Streptomyces	s__Streptomyces caatingaensis	2	0	1	0	0	0	0	0	3
RS_GCF_000295955.2	d__Bacteria	p__Proteobacteria	c__Gammaproteobacteria	o__Enterobacterales	f__Enterobacteriaceae	g__Pantoea	s__Pantoea sp000295955	3	0	0	0	0	0	0	0	3
RS_GCF_002939785.1	d__Bacteria	p__Proteobacteria	c__Gammaproteobacteria	o__Xanthomonadales	f__Xanthomonadaceae	g__Xanthomonas	s__Xanthomonas codiaei	3	0	0	0	0	0	0	0	3
RS_GCF_001277195.1	d__Bacteria	p__Proteobacteria	c__Gammaproteobacteria	o__Enterobacterales	f__Enterobacteriaceae	g__Cronobacter	s__Cronobacter muytjensii	3	0	0	0	0	0	0	0	3
RS_GCF_002223185.1	d__Bacteria	p__Proteobacteria	c__Gammaproteobacteria	o__Burkholderiales	f__Burkholderiaceae	g__Burkholderia	s__Burkholderia sp002223185	3	0	0	0	0	0	0	0	3
RS_GCF_002156455.1	d__Bacteria	p__Proteobacteria	c__Gammaproteobacteria	o__Enterobacterales	f__Vibrionaceae	g__Vibrio	s__Vibrio coralliirubri	3	0	0	0	0	0	0	0	3
RS_GCF_900142905.1	d__Bacteria	p__Proteobacteria	c__Gammaproteobacteria	o__Burkholderiales	f__Burkholderiaceae	g__Paraburkholderia	s__Paraburkholderia sp900142905	3	0	0	0	0	0	0	0	3
RS_GCF_001311825.1	d__Bacteria	p__Desulfobacterota_A	c__Desulfovibrionia	o__Desulfovibrionales	f__Desulfovibrionaceae	g__Pseudodesulfovibrio	s__Pseudodesulfovibrio brasiliensis	1	0	0	0	0	0	2	0	3
RS_GCF_003012345.1	d__Bacteria	p__Proteobacteria	c__Gammaproteobacteria	o__Pseudomonadales	f__Halomonadaceae	g__R4HLG17	s__R4HLG17 sp003012345	3	0	0	0	0	0	0	0	3
RS_GCF_000720185.1	d__Bacteria	p__Actinobacteriota	c__Actinobacteria	o__Streptomycetales	f__Streptomycetaceae	g__Streptomyces	s__Streptomyces sp000720185	3	0	0	0	0	0	0	0	3
RS_GCF_002214725.1	d__Bacteria	p__Firmicutes	c__Bacilli	o__Bacillales	f__Bacillaceae_G	g__Bacillus_A	s__Bacillus_A cereus_AD	2	0	0	1	0	0	0	0	3
RS_GCF_002080045.1	d__Bacteria	p__Proteobacteria	c__Gammaproteobacteria	o__Pseudomonadales	f__Pseudomonadaceae	g__Pseudomonas_E	s__Pseudomonas_E sp002080045	3	0	0	0	0	0	0	0	3
RS_GCF_001467945.1	d__Bacteria	p__Proteobacteria	c__Gammaproteobacteria	o__Legionellales	f__Legionellaceae	g__Legionella	s__Legionella parisiensis	3	0	0	0	0	0	0	0	3
RS_GCF_001524645.2	d__Bacteria	p__Proteobacteria	c__Gammaproteobacteria	o__Burkholderiales	f__Burkholderiaceae	g__Burkholderia	s__Burkholderia sp001524645	3	0	0	0	0	0	0	0	3
RS_GCF_001411495.1	d__Bacteria	p__Proteobacteria	c__Gammaproteobacteria	o__Burkholderiales	f__Burkholderiaceae	g__Burkholderia	s__Burkholderia cepacia	3	0	0	0	0	0	0	0	3
RS_GCF_000621165.1	d__Bacteria	p__Proteobacteria	c__Gammaproteobacteria	o__Enterobacterales	f__Vibrionaceae	g__Enterovibrio	s__Enterovibrio calviensis	3	0	0	0	0	0	0	0	3
RS_GCF_000970685.1	d__Bacteria	p__Firmicutes	c__Bacilli	o__Bacillales	f__Domibacillaceae	g__Domibacillus	s__Domibacillus indicus	1	0	0	2	0	0	0	0	3
RS_GCF_000734965.1	d__Bacteria	p__Proteobacteria	c__Gammaproteobacteria	o__Enterobacterales	f__Enterobacteriaceae	g__Trabulsiella	s__Trabulsiella guamensis	3	0	0	0	0	0	0	0	3
RS_GCF_001552195.1	d__Bacteria	p__Actinobacteriota	c__Actinobacteria	o__Streptosporangiales	f__Streptosporangiaceae	g__Spirillospora	s__Spirillospora latina	3	0	0	0	0	0	0	0	3
RS_GCF_000194625.1	d__Archaea	p__Halobacterota	c__Archaeoglobi	o__Archaeoglobales	f__Archaeoglobaceae	g__Archaeoglobus_C	s__Archaeoglobus_C veneficus	0	0	0	0	1	1	0	0	2
RS_GCF_002078355.1	d__Archaea	p__Thermoplasmatota	c__Thermoplasmata	o__Thermoplasmatales	f__Thermoplasmataceae	g__Ferroplasma	s__Ferroplasma acidiphilum	0	0	0	2	0	0	0	0	2
RS_GCF_900110215.1	d__Archaea	p__Halobacterota	c__Halobacteria	o__Halobacteriales	f__Haloarculaceae	g__Halorientalis	s__Halorientalis persicus	2	0	0	0	0	0	0	0	2
RS_GCF_001953745.1	d__Archaea	p__Halobacterota	c__Halobacteria	o__Halobacteriales	f__Natrialbaceae	g__Natrinema	s__Natrinema saccharevitans	2	0	0	0	0	0	0	0	2
RS_GCF_000152265.2	d__Archaea	p__Thermoplasmatota	c__Thermoplasmata	o__Thermoplasmatales	f__Thermoplasmataceae	g__Ferroplasma	s__Ferroplasma acidarmanus	0	0	0	2	0	0	0	0	2
GB_GCA_002506595.1	d__Archaea	p__Crenarchaeota	c__Thermoprotei	o__Desulfurococcales	f__Acidilobaceae	g__Caldisphaera	s__Caldisphaera sp002506595	0	0	0	0	1	1	0	0	2
RS_GCF_000739555.1	d__Archaea	p__Halobacterota	c__Halobacteria	o__Halobacteriales	f__Haloferacaceae	g__Halolamina	s__Halolamina rubra	2	0	0	0	0	0	0	0	2
RS_GCF_000008665.1	d__Archaea	p__Halobacterota	c__Archaeoglobi	o__Archaeoglobales	f__Archaeoglobaceae	g__Archaeoglobus	s__Archaeoglobus fulgidus	0	0	0	0	1	1	0	0	2
GB_GCA_001896715.1	d__Archaea	p__Halobacterota	c__Methanomicrobia	o__Methanomicrobiales	f__Methanocullaceae	g__Methanoculleus	s__Methanoculleus sp001896715	0	0	0	0	0	0	0	2	2
GB_GCA_001316285.1	d__Archaea	p__Crenarchaeota	c__Thermoprotei	o__Thermoproteales	f__Thermocladiaceae	g__Vulcanisaeta	s__Vulcanisaeta sp001316285	0	0	0	0	1	1	0	0	2
RS_GCF_000813245.1	d__Archaea	p__Crenarchaeota	c__Thermoprotei	o__Thermofilales	f__Thermofilaceae	g__Thermofilum	s__Thermofilum carboxyditrophus	0	0	0	0	1	1	0	0	2
RS_GCF_003205235.1	d__Archaea	p__Thermoplasmatota	c__Thermoplasmata	o__Thermoplasmatales	f__Thermoplasmataceae	g__Thermoplasma	s__Thermoplasma sp003205235	0	0	0	2	0	0	0	0	2
RS_GCF_000025625.1	d__Archaea	p__Halobacterota	c__Halobacteria	o__Halobacteriales	f__Natrialbaceae	g__Natrialba	s__Natrialba magadii	2	0	0	0	0	0	0	0	2
RS_GCF_000739595.1	d__Archaea	p__Halobacterota	c__Halobacteria	o__Halobacteriales	f__Haloferacaceae	g__Halorubrum	s__Halorubrum halophilum	2	0	0	0	0	0	0	0	2
GB_GCA_002855745.1	d__Archaea	p__Crenarchaeota	c__Thermoprotei	o__Thermofilales	f__Thermofilaceae	g__Thermofilum_A	s__Thermofilum_A sp002855745	0	0	0	0	1	1	0	0	2
GB_GCA_001315925.1	d__Archaea	p__Crenarchaeota	c__Thermoprotei	o__Thermoproteales	f__Thermocladiaceae	g__Thermocladium	s__Thermocladium modestius	0	0	0	0	1	1	0	0	2
RS_GCF_000337475.1	d__Archaea	p__Halobacterota	c__Halobacteria	o__Halobacteriales	f__Natrialbaceae	g__Natrinema	s__Natrinema limicola	2	0	0	0	0	0	0	0	2
GB_GCA_900083515.1	d__Archaea	p__Thermoplasmatota	c__Thermoplasmata	o__Thermoplasmatales	f__Thermoplasmataceae	g__Cuniculiplasma	s__Cuniculiplasma divulgatum	0	0	0	2	0	0	0	0	2
RS_GCF_000317795.1	d__Archaea	p__Crenarchaeota	c__Thermoprotei	o__Desulfurococcales	f__Acidilobaceae	g__Caldisphaera	s__Caldisphaera lagunensis	0	0	0	0	1	1	0	0	2
RS_GCF_000144915.1	d__Archaea	p__Crenarchaeota	c__Thermoprotei	o__Desulfurococcales	f__Acidilobaceae	g__Acidilobus	s__Acidilobus saccharovorans	0	0	0	0	1	1	0	0	2
GB_GCA_000495735.1	d__Archaea	p__Crenarchaeota	c__Thermoprotei	o__Desulfurococcales	f__Acidilobaceae	g__Acidilobus	s__Acidilobus sp000495735	0	0	0	0	1	1	0	0	2
RS_GCF_000337335.1	d__Archaea	p__Halobacterota	c__Halobacteria	o__Halobacteriales	f__Haloferacaceae	g__Halorubrum	s__Halorubrum distributum	2	0	0	0	0	0	0	0	2
GB_GCA_002505185.1	d__Archaea	p__Thermoplasmatota	c__Thermoplasmata	o__Thermoplasmatales	f__Thermoplasmataceae	g__Ferroplasma	s__Ferroplasma sp002505185	0	0	0	2	0	0	0	0	2
RS_GCF_000015225.1	d__Archaea	p__Crenarchaeota	c__Thermoprotei	o__Thermofilales	f__Thermofilaceae	g__Thermofilum	s__Thermofilum pendens	0	0	0	0	1	1	0	0	2
RS_GCF_001663375.1	d__Archaea	p__Crenarchaeota	c__Thermoprotei	o__Thermoproteales	f__Thermocladiaceae	g__Caldivirga	s__Caldivirga sp001663375	0	0	0	0	1	1	0	0	2
GB_GCA_000016385.1	d__Archaea	p__Crenarchaeota	c__Thermoprotei	o__Thermoproteales	f__Thermoproteaceae	g__Pyrobaculum	s__Pyrobaculum arsenaticum	0	0	0	0	1	1	0	0	2
GB_GCA_002877855.1	d__Archaea	p__Crenarchaeota	c__Thermoprotei	o__Desulfurococcales	f__Acidilobaceae	g__ZAV-19	s__ZAV-19 sp002877855	0	0	0	0	1	1	0	0	2
GB_GCA_002507085.1	d__Archaea	p__Crenarchaeota	c__Thermoprotei	o__Marsarchaeales	f__UBA168	g__UBA168	s__UBA168 sp002507085	0	0	0	0	1	1	0	0	2
RS_GCF_001412615.1	d__Archaea	p__Crenarchaeota	c__Thermoprotei	o__Desulfurococcales	f__Pyrodictiaceae	g__Pyrodictium	s__Pyrodictium delaneyi	0	0	0	0	1	1	0	0	2
RS_GCF_000385565.1	d__Archaea	p__Halobacterota	c__Archaeoglobi	o__Archaeoglobales	f__Archaeoglobaceae	g__Archaeoglobus_A	s__Archaeoglobus_A sulfaticallidus	0	0	0	0	1	1	0	0	2
RS_GCF_000195915.1	d__Archaea	p__Thermoplasmatota	c__Thermoplasmata	o__Thermoplasmatales	f__Thermoplasmataceae	g__Thermoplasma	s__Thermoplasma acidophilum	0	0	0	2	0	0	0	0	2
GB_GCA_000234805.1	d__Archaea	p__Crenarchaeota	c__Thermoprotei	o__Thermoproteales	f__Thermoproteaceae	g__Pyrobaculum	s__Pyrobaculum ferrireducens	0	0	0	0	1	1	0	0	2
GB_GCA_002498845.1	d__Archaea	p__Thermoplasmatota	c__Thermoplasmata	o__Thermoplasmatales	f__Thermoplasmataceae	g__UBA509	s__UBA509 sp002498845	0	0	0	2	0	0	0	0	2
GB_GCA_002506515.1	d__Archaea	p__Crenarchaeota	c__Thermoprotei	o__Thermoproteales	f__Thermocladiaceae	g__Caldivirga	s__Caldivirga sp002506515	0	0	0	0	1	1	0	0	2
RS_GCF_000011185.1	d__Archaea	p__Thermoplasmatota	c__Thermoplasmata	o__Thermoplasmatales	f__Thermoplasmataceae	g__Thermoplasma	s__Thermoplasma volcanium	0	0	0	2	0	0	0	0	2
RS_GCF_000018305.1	d__Archaea	p__Crenarchaeota	c__Thermoprotei	o__Thermoproteales	f__Thermocladiaceae	g__Caldivirga	s__Caldivirga maquilingensis	0	0	0	0	1	1	0	0	2
RS_GCF_000230715.2	d__Archaea	p__Halobacterota	c__Halobacteria	o__Halobacteriales	f__Natrialbaceae	g__Natronobacterium	s__Natronobacterium gregoryi	2	0	0	0	0	0	0	0	2
RS_GCF_000376445.1	d__Archaea	p__Halobacterota	c__Halobacteria	o__Halobacteriales	f__Haloadaptaceae	g__Haladaptatus	s__Haladaptatus paucihalophilus	2	0	0	0	0	0	0	0	2
GB_GCA_001856825.1	d__Archaea	p__Thermoplasmatota	c__Thermoplasmata	o__Thermoplasmatales	f__GCA-001856825	g__GCA-001856825	s__GCA-001856825 sp001856825	0	0	1	0	0	1	0	0	2
RS_GCF_000019605.1	d__Archaea	p__Crenarchaeota	c__Korarchaeia	o__Korarchaeales	f__Korarchaeaceae	g__Korarchaeum	s__Korarchaeum cryptofilum	0	0	0	0	1	1	0	0	2
RS_GCF_001462205.1	d__Archaea	p__Halobacterota	c__Halobacteria	o__Halobacteriales	f__Haloferacaceae	g__Haloparvum	s__Haloparvum sedimenti	2	0	0	0	0	0	0	0	2
GB_GCA_002011085.1	d__Archaea	p__Crenarchaeota	c__Nitrososphaeria	o__JDFR-14	f__JDFR-14	g__JDFR-14	s__JDFR-14 sp002011085	0	0	0	0	1	1	0	0	2
RS_GCF_900176435.1	d__Archaea	p__Thermoplasmatota	c__Thermoplasmata	o__Thermoplasmatales	f__Thermoplasmataceae	g__Picrophilus	s__Picrophilus oshimae	0	0	0	2	0	0	0	0	2
GB_GCA_000019805.1	d__Archaea	p__Crenarchaeota	c__Thermoprotei	o__Thermoproteales	f__Thermoproteaceae	g__Pyrobaculum	s__Pyrobaculum neutrophilum	0	0	0	0	1	1	0	0	2
RS_GCF_002156705.1	d__Archaea	p__Halobacterota	c__Halobacteria	o__Halobacteriales	f__Natrialbaceae	g__B1-Br10-E2g2	s__B1-Br10-E2g2 sp002156705	2	0	0	0	0	0	0	0	2
RS_GCF_000253055.1	d__Archaea	p__Crenarchaeota	c__Thermoprotei	o__Thermoproteales	f__Thermoproteaceae	g__Thermoproteus	s__Thermoproteus tenax	0	0	0	0	1	1	0	0	2
RS_GCF_000337695.1	d__Archaea	p__Halobacterota	c__Halobacteria	o__Halobacteriales	f__Natrialbaceae	g__Natronococcus	s__Natronococcus jeotgali	2	0	0	0	0	0	0	0	2
RS_GCF_000993805.1	d__Archaea	p__Crenarchaeota	c__Thermoprotei	o__Thermofilales	f__Thermofilaceae	g__Thermofilum_A	s__Thermofilum_A uzonense	0	0	0	0	1	1	0	0	2
GB_GCA_001516585.1	d__Archaea	p__Crenarchaeota	c__Thermoprotei	o__Thermoproteales	f__Thermocladiaceae	g__Thermocladium	s__Thermocladium sp001516585	0	0	0	0	1	1	0	0	2
RS_GCF_001462395.1	d__Archaea	p__Crenarchaeota	c__Thermoprotei	o__Desulfurococcales	f__Pyrodictiaceae	g__Pyrodictium	s__Pyrodictium occultum	0	0	0	0	1	1	0	0	2
RS_GCF_000015205.1	d__Archaea	p__Crenarchaeota	c__Thermoprotei	o__Thermoproteales	f__Thermoproteaceae	g__Pyrobaculum	s__Pyrobaculum islandicum	0	0	0	0	1	1	0	0	2
RS_GCF_000015145.1	d__Archaea	p__Crenarchaeota	c__Thermoprotei	o__Desulfurococcales	f__Pyrodictiaceae	g__Hyperthermus	s__Hyperthermus butylicus	0	0	0	0	1	1	0	0	2
GB_GCA_003287355.1	d__Archaea	p__Halobacterota	c__Halobacteria	o__Halobacteriales	f__Haloferacaceae	g__Halorubrum	s__Halorubrum sp003287355	2	0	0	0	0	0	0	0	2
RS_GCF_000372745.1	d__Bacteria	p__Actinobacteriota	c__Actinobacteria	o__Streptomycetales	f__Streptomycetaceae	g__Embleya	s__Embleya scabrispora	1	0	1	0	0	0	0	0	2
RS_GCF_002272135.1	d__Bacteria	p__Firmicutes	c__Bacilli	o__Bacillales	f__Amphibacillaceae	g__Terribacillus	s__Terribacillus sp002272135	1	0	0	1	0	0	0	0	2
RS_GCF_900380485.1	d__Bacteria	p__Proteobacteria	c__Gammaproteobacteria	o__Enterobacterales	f__Shewanellaceae	g__Shewanella	s__Shewanella algidipiscicola	2	0	0	0	0	0	0	0	2
GB_GCA_002425245.1	d__Bacteria	p__Proteobacteria	c__Gammaproteobacteria	o__Burkholderiales	f__Rhodocyclaceae	g__Dechloromonas	s__Dechloromonas sp002425245	2	0	0	0	0	0	0	0	2
RS_GCF_000759775.1	d__Bacteria	p__Proteobacteria	c__Gammaproteobacteria	o__Enterobacterales	f__Enterobacteriaceae	g__Escherichia	s__Escherichia albertii	2	0	0	0	0	0	0	0	2
RS_GCF_002514725.1	d__Bacteria	p__Proteobacteria	c__Gammaproteobacteria	o__Pseudomonadales	f__Oleiphilaceae	g__Mangrovitalea	s__Mangrovitalea sediminis	2	0	0	0	0	0	0	0	2
RS_GCF_001648175.1	d__Bacteria	p__Proteobacteria	c__Gammaproteobacteria	o__Pseudomonadales	f__Halomonadaceae	g__Halotalea	s__Halotalea alkalilenta_A	2	0	0	0	0	0	0	0	2
RS_GCF_002797895.1	d__Bacteria	p__Proteobacteria	c__Gammaproteobacteria	o__Burkholderiales	f__Burkholderiaceae	g__Janthinobacterium	s__Janthinobacterium sp002797895	2	0	0	0	0	0	0	0	2
RS_GCF_002102355.1	d__Bacteria	p__Actinobacteriota	c__Actinobacteria	o__Mycobacteriales	f__Mycobacteriaceae	g__Mycobacterium	s__Mycobacterium sherrisii	1	0	1	0	0	0	0	0	2
RS_GCF_000261685.1	d__Bacteria	p__Proteobacteria	c__Alphaproteobacteria	o__Rhizobiales	f__Xanthobacteraceae	g__Bradyrhizobium	s__Bradyrhizobium sp000261685	2	0	0	0	0	0	0	0	2
RS_GCF_001269805.1	d__Bacteria	p__Proteobacteria	c__Gammaproteobacteria	o__Pseudomonadales	f__Pseudomonadaceae	g__Pseudomonas_E	s__Pseudomonas_E sp001269805	2	0	0	0	0	0	0	0	2
RS_GCF_002884495.1	d__Bacteria	p__Firmicutes	c__Bacilli	o__Bacillales_A	f__Planococcaceae	g__Rummeliibacillus	s__Rummeliibacillus pycnus	1	0	0	1	0	0	0	0	2
RS_GCF_002271785.1	d__Bacteria	p__Firmicutes	c__Bacilli	o__Bacillales	f__Bacillaceae	g__Bacillus_AY	s__Bacillus_AY sp002271785	1	0	0	1	0	0	0	0	2
RS_GCF_001038695.1	d__Bacteria	p__Firmicutes	c__Bacilli	o__Bacillales	f__Bacillaceae_B	g__Bacillus_F	s__Bacillus_F marisflavi_A	0	0	0	2	0	0	0	0	2
RS_GCF_002356535.1	d__Bacteria	p__Proteobacteria	c__Gammaproteobacteria	o__Pseudomonadales	f__Pseudomonadaceae	g__Pseudomonas_E	s__Pseudomonas_E sp002356535	2	0	0	0	0	0	0	0	2
RS_GCF_000264785.1	d__Bacteria	p__Proteobacteria	c__Gammaproteobacteria	o__Enterobacterales	f__Enterobacteriaceae	g__Edwardsiella	s__Edwardsiella ictaluri	2	0	0	0	0	0	0	0	2
RS_GCF_000422545.1	d__Bacteria	p__Desulfobacterota_A	c__Desulfovibrionia	o__Desulfovibrionales	f__Desulfovibrionaceae	g__Desulfocurvibacter	s__Desulfocurvibacter africanus	1	0	0	0	0	0	1	0	2
GB_GCA_002841995.1	d__Bacteria	p__Chloroflexota	c__Anaerolineae	o__Anaerolineales	f__Anaerolineaceae	g__UBA6170	s__UBA6170 sp002841995	1	0	0	0	0	0	1	0	2
RS_GCF_003226555.1	d__Bacteria	p__Proteobacteria	c__Alphaproteobacteria	o__Rhizobiales	f__Xanthobacteraceae	g__Rhodopseudomonas	s__Rhodopseudomonas palustris_I	2	0	0	0	0	0	0	0	2
RS_GCF_002135335.1	d__Bacteria	p__Proteobacteria	c__Gammaproteobacteria	o__Pseudomonadales	f__Moraxellaceae	g__Acinetobacter	s__Acinetobacter sp002135335	2	0	0	0	0	0	0	0	2
RS_GCF_900102135.1	d__Bacteria	p__Proteobacteria	c__Alphaproteobacteria	o__Rhizobiales	f__Beijerinckiaceae	g__Microvirga	s__Microvirga guangxiensis	1	0	0	0	0	0	1	0	2
RS_GCF_000819565.1	d__Bacteria	p__Proteobacteria	c__Alphaproteobacteria	o__Rhodobacterales	f__Rhodobacteraceae	g__Celeribacter	s__Celeribacter indicus	2	0	0	0	0	0	0	0	2
RS_GCF_002578045.1	d__Bacteria	p__Firmicutes	c__Bacilli	o__Bacillales	f__Bacillaceae_G	g__Bacillus_A	s__Bacillus_A cereus_AK	1	0	0	1	0	0	0	0	2
RS_GCF_000263715.2	d__Bacteria	p__Proteobacteria	c__Gammaproteobacteria	o__Pseudomonadales	f__Pseudomonadaceae	g__Pseudomonas_E	s__Pseudomonas_E synxantha_A	2	0	0	0	0	0	0	0	2
RS_GCF_000426185.1	d__Bacteria	p__Actinobacteriota	c__Actinobacteria	o__Actinomycetales	f__Cellulomonadaceae	g__Cellulomonas	s__Cellulomonas sp000426185	2	0	0	0	0	0	0	0	2
RS_GCF_000802425.1	d__Bacteria	p__Proteobacteria	c__Gammaproteobacteria	o__Pseudomonadales	f__Pseudomonadaceae	g__Pseudomonas_H	s__Pseudomonas_H flexibilis	2	0	0	0	0	0	0	0	2
RS_GCF_900106975.1	d__Bacteria	p__Proteobacteria	c__Gammaproteobacteria	o__Pseudomonadales	f__Pseudomonadaceae	g__Pseudomonas_O	s__Pseudomonas_O kuykendallii	2	0	0	0	0	0	0	0	2
RS_GCF_000282535.1	d__Bacteria	p__Proteobacteria	c__Gammaproteobacteria	o__Pseudomonadales	f__Pseudomonadaceae	g__Pseudomonas_E	s__Pseudomonas_E sp000282535	2	0	0	0	0	0	0	0	2
RS_GCF_900099705.1	d__Bacteria	p__Actinobacteriota	c__Actinobacteria	o__Actinomycetales	f__Microbacteriaceae	g__Agrococcus	s__Agrococcus jejuensis	2	0	0	0	0	0	0	0	2
RS_GCF_900108065.1	d__Bacteria	p__Proteobacteria	c__Gammaproteobacteria	o__Pseudomonadales	f__Nitrincolaceae	g__Marinobacterium	s__Marinobacterium lutimaris	2	0	0	0	0	0	0	0	2
RS_GCF_900107925.1	d__Bacteria	p__Actinobacteriota	c__Actinobacteria	o__Mycobacteriales	f__Pseudonocardiaceae	g__Amycolatopsis	s__Amycolatopsis pretoriensis	2	0	0	0	0	0	0	0	2
RS_GCF_000287055.2	d__Bacteria	p__Proteobacteria	c__Gammaproteobacteria	o__Enterobacterales	f__Vibrionaceae	g__Vibrio	s__Vibrio sp000287055	2	0	0	0	0	0	0	0	2
RS_GCF_000531755.1	d__Bacteria	p__Proteobacteria	c__Gammaproteobacteria	o__Enterobacterales	f__Enterobacteriaceae	g__Xenorhabdus	s__Xenorhabdus cabanillasii	2	0	0	0	0	0	0	0	2
RS_GCF_000686845.1	d__Bacteria	p__Firmicutes_I	c__Bacilli_A	o__Paenibacillales	f__Paenibacillaceae	g__Paenibacillus_S	s__Paenibacillus_S sp000686845	1	0	0	1	0	0	0	0	2
RS_GCF_003060825.1	d__Bacteria	p__Firmicutes_I	c__Bacilli_A	o__Paenibacillales	f__Paenibacillaceae	g__Paenibacillus_R	s__Paenibacillus_R sp003060825	1	0	0	1	0	0	0	0	2
RS_GCF_900119845.1	d__Bacteria	p__Proteobacteria	c__Alphaproteobacteria	o__Rhizobiales	f__Devosiaceae	g__Devosia	s__Devosia enhydra	2	0	0	0	0	0	0	0	2
GB_GCA_003222055.1	d__Bacteria	p__Gemmatimonadota	c__Gemmatimonadetes	o__Gemmatimonadales	f__GWC2-71-9	g__AG41	s__AG41 sp003222055	0	0	1	0	0	0	0	1	2
GB_GCA_000406005.1	d__Bacteria	p__Poribacteria	c__WGA-4E	o__WGA-4E	f__WGA-3G	g__WGA-3G	s__WGA-3G sp000406005	0	0	1	0	0	0	0	1	2
GB_GCA_003244045.1	d__Bacteria	p__Dormibacterota	c__Dormibacteria	o__UBA8260	f__UBA8260	g__Palsa-875	s__Palsa-875 sp003244045	0	0	0	0	0	0	0	2	2
RS_GCF_001696715.1	d__Bacteria	p__Proteobacteria	c__Gammaproteobacteria	o__Burkholderiales	f__Rhodocyclaceae	g__Thauera	s__Thauera phenolivorans	2	0	0	0	0	0	0	0	2
RS_GCF_001083805.1	d__Bacteria	p__Proteobacteria	c__Gammaproteobacteria	o__Enterobacterales	f__Enterobacteriaceae	g__Photorhabdus	s__Photorhabdus luminescens	2	0	0	0	0	0	0	0	2
RS_GCF_002835805.1	d__Bacteria	p__Firmicutes	c__Bacilli	o__Bacillales	f__Bacillaceae_A	g__Bacillus_AC	s__Bacillus_AC nealsonii	1	0	0	1	0	0	0	0	2
RS_GCF_002934265.1	d__Bacteria	p__Actinobacteriota	c__Actinobacteria	o__Mycobacteriales	f__Pseudonocardiaceae	g__Actinokineospora	s__Actinokineospora auranticolor	2	0	0	0	0	0	0	0	2
RS_GCF_002148155.1	d__Bacteria	p__Firmicutes	c__Bacilli	o__Bacillales	f__Bacillaceae_G	g__Bacillus_A	s__Bacillus_A thuringiensis_J	1	0	0	1	0	0	0	0	2
RS_GCF_001463905.1	d__Bacteria	p__Proteobacteria	c__Alphaproteobacteria	o__Rhizobiales	f__Rhizobiaceae	g__Aureimonas	s__Aureimonas frigidaquae	2	0	0	0	0	0	0	0	2
RS_GCF_000158095.1	d__Bacteria	p__Proteobacteria	c__Alphaproteobacteria	o__Rhizobiales	f__Stappiaceae	g__Labrenzia	s__Labrenzia alexandrii	2	0	0	0	0	0	0	0	2
RS_GCF_003003095.1	d__Bacteria	p__Proteobacteria	c__Alphaproteobacteria	o__Rhodobacterales	f__Rhodobacteraceae	g__Hasllibacter	s__Hasllibacter halocynthiae	2	0	0	0	0	0	0	0	2
RS_GCF_900104025.1	d__Bacteria	p__Actinobacteriota	c__Actinobacteria	o__Mycobacteriales	f__Geodermatophilaceae	g__Geodermatophilus	s__Geodermatophilus sp900104025	1	0	1	0	0	0	0	0	2
RS_GCF_900143255.1	d__Bacteria	p__Desulfobacterota_A	c__Desulfovibrionia	o__Desulfovibrionales	f__Desulfovibrionaceae	g__Desulfovibrio_L	s__Desulfovibrio_L litoralis	1	0	0	0	0	0	1	0	2
RS_GCF_900110575.1	d__Bacteria	p__Actinobacteriota	c__Actinobacteria	o__Mycobacteriales	f__Pseudonocardiaceae	g__Amycolatopsis	s__Amycolatopsis saalfeldensis	2	0	0	0	0	0	0	0	2
GB_GCA_003152455.1	d__Bacteria	p__Proteobacteria	c__Alphaproteobacteria	o__Rhizobiales	f__Xanthobacteraceae	g__Pseudolabrys	s__Pseudolabrys sp003152455	2	0	0	0	0	0	0	0	2
RS_GCF_002154575.1	d__Bacteria	p__Actinobacteriota	c__Actinobacteria	o__Streptomycetales	f__Streptomycetaceae	g__Streptomyces	s__Streptomyces bobili	1	0	1	0	0	0	0	0	2
RS_GCF_002088975.1	d__Bacteria	p__Proteobacteria	c__Alphaproteobacteria	o__Caulobacterales	f__Hyphomonadaceae	g__Henriciella	s__Henriciella aquimarina	2	0	0	0	0	0	0	0	2
RS_GCF_001418035.1	d__Bacteria	p__Proteobacteria	c__Gammaproteobacteria	o__Burkholderiales	f__Chromobacteriaceae	g__Gulbenkiania	s__Gulbenkiania indica	2	0	0	0	0	0	0	0	2
RS_GCF_000429305.1	d__Bacteria	p__Desulfobacterota_A	c__Desulfovibrionia	o__Desulfovibrionales	f__Desulfovibrionaceae	g__Desulfovibrio_M	s__Desulfovibrio_M inopinatus	2	0	0	0	0	0	0	0	2
RS_GCF_000384035.1	d__Bacteria	p__Actinobacteriota	c__Actinobacteria	o__Mycobacteriales	f__Pseudonocardiaceae	g__Actinopolyspora	s__Actinopolyspora mortivallis	1	0	1	0	0	0	0	0	2
RS_GCF_000021385.1	d__Bacteria	p__Desulfobacterota_A	c__Desulfovibrionia	o__Desulfovibrionales	f__Desulfovibrionaceae	g__Desulfovibrio_A	s__Desulfovibrio_A vulgaris_A	1	0	0	0	0	0	1	0	2
RS_GCF_000156435.1	d__Bacteria	p__Actinobacteriota	c__Actinobacteria	o__Streptomycetales	f__Streptomycetaceae	g__Streptomyces	s__Streptomyces viridosporus	1	0	1	0	0	0	0	0	2
RS_GCF_002091715.1	d__Bacteria	p__Proteobacteria	c__Gammaproteobacteria	o__Pseudomonadales	f__Pseudomonadaceae	g__Pseudomonas_E	s__Pseudomonas_E migulae	2	0	0	0	0	0	0	0	2
GB_GCA_002339325.1	d__Bacteria	p__Nitrospirota	c__Thermodesulfovibrionia	o__Thermodesulfovibrionales	f__Thermodesulfovibrionaceae	g__Thermodesulfovibrio	s__Thermodesulfovibrio sp002339325	1	0	0	0	0	0	1	0	2
RS_GCF_002980595.1	d__Bacteria	p__Proteobacteria	c__Gammaproteobacteria	o__Burkholderiales	f__Burkholderiaceae	g__Malikia	s__Malikia granosa	2	0	0	0	0	0	0	0	2
RS_GCF_001672975.1	d__Bacteria	p__Actinobacteriota	c__Actinobacteria	o__Mycobacteriales	f__Mycobacteriaceae	g__Mycobacterium	s__Mycobacterium sp001672975	2	0	0	0	0	0	0	0	2
RS_GCF_900102505.1	d__Bacteria	p__Proteobacteria	c__Alphaproteobacteria	o__Rhodobacterales	f__Rhodobacteraceae	g__Paracoccus	s__Paracoccus tibetensis	2	0	0	0	0	0	0	0	2
RS_GCF_002093625.1	d__Bacteria	p__Proteobacteria	c__Gammaproteobacteria	o__Enterobacterales	f__Enterobacteriaceae	g__Rouxiella	s__Rouxiella silvae	2	0	0	0	0	0	0	0	2
RS_GCF_000190755.2	d__Bacteria	p__Proteobacteria	c__Gammaproteobacteria	o__Methylococcales	f__Methylomonadaceae	g__Methylobacter_A	s__Methylobacter_A tundripaludum	2	0	0	0	0	0	0	0	2
RS_GCF_001886815.1	d__Bacteria	p__Calditrichota	c__Calditrichia	o__Calditrichales	f__Calditrichaceae	g__Caldithrix	s__Caldithrix abyssi	1	0	0	0	0	0	1	0	2
RS_GCF_000297395.2	d__Bacteria	p__Actinobacteriota	c__Actinobacteria	o__Mycobacteriales	f__Micromonosporaceae	g__Micromonospora	s__Micromonospora lupini	2	0	0	0	0	0	0	0	2
RS_GCF_001028135.1	d__Bacteria	p__Proteobacteria	c__Gammaproteobacteria	o__Enterobacterales	f__Enterobacteriaceae	g__Xenorhabdus	s__Xenorhabdus griffiniae	2	0	0	0	0	0	0	0	2
RS_GCF_000815225.1	d__Bacteria	p__Proteobacteria	c__Gammaproteobacteria	o__Francisellales	f__Francisellaceae	g__Allofrancisella	s__Allofrancisella guangzhouensis	2	0	0	0	0	0	0	0	2
RS_GCF_000876675.1	d__Bacteria	p__Proteobacteria	c__Alphaproteobacteria	o__Sphingomonadales	f__Sphingomonadaceae	g__Novosphingobium	s__Novosphingobium sp000876675	2	0	0	0	0	0	0	0	2
RS_GCF_002259415.1	d__Bacteria	p__Actinobacteriota	c__Actinobacteria	o__Mycobacteriales	f__Mycobacteriaceae	g__Rhodococcus	s__Rhodococcus sp002259415	2	0	0	0	0	0	0	0	2
RS_GCF_900091425.1	d__Bacteria	p__Actinobacteriota	c__Actinobacteria	o__Mycobacteriales	f__Micromonosporaceae	g__Micromonospora	s__Micromonospora krabiensis	2	0	0	0	0	0	0	0	2
RS_GCF_001373415.1	d__Bacteria	p__Firmicutes_I	c__Bacilli_A	o__Paenibacillales	f__Paenibacillaceae	g__Paenibacillus	s__Paenibacillus sp001373415	1	0	0	1	0	0	0	0	2
RS_GCF_001619605.1	d__Bacteria	p__Firmicutes_I	c__Bacilli_A	o__Brevibacillales	f__Brevibacillaceae	g__Brevibacillus	s__Brevibacillus parabrevis	0	0	0	2	0	0	0	0	2
GB_GCA_003165095.1	d__Bacteria	p__Acidobacteriota	c__Acidobacteriae	o__Acidobacteriales	f__Acidobacteriaceae	g__Terracidiphilus	s__Terracidiphilus sp003165095	1	0	0	0	0	0	1	0	2
RS_GCF_001687105.1	d__Bacteria	p__Proteobacteria	c__Alphaproteobacteria	o__Rhodobacterales	f__Rhodobacteraceae	g__Salipiger	s__Salipiger sp001687105	2	0	0	0	0	0	0	0	2
GB_GCA_900095415.1	d__Bacteria	p__Proteobacteria	c__Alphaproteobacteria	o__Rhizobiales	f__Pleomorphomonadaceae	g__Pleomorphomonas	s__Pleomorphomonas sp900095415	2	0	0	0	0	0	0	0	2
RS_GCF_000802155.2	d__Bacteria	p__Proteobacteria	c__Gammaproteobacteria	o__Pseudomonadales	f__Pseudomonadaceae	g__Pseudomonas_E	s__Pseudomonas_E frederiksbergensis_A	2	0	0	0	0	0	0	0	2
RS_GCF_002799245.1	d__Bacteria	p__Proteobacteria	c__Gammaproteobacteria	o__Xanthomonadales	f__Xanthomonadaceae	g__Stenotrophomonas	s__Stenotrophomonas maltophilia_S	2	0	0	0	0	0	0	0	2
GB_GCA_002694745.1	d__Bacteria	p__Proteobacteria	c__Alphaproteobacteria	o__Sphingomonadales	f__Sphingomonadaceae	g__Croceicoccus	s__Croceicoccus sp002694745	2	0	0	0	0	0	0	0	2
RS_GCF_002162315.1	d__Bacteria	p__Campylobacterota	c__Campylobacteria	o__Campylobacterales	f__Sulfurospirillaceae	g__Sulfurospirillum	s__Sulfurospirillum sp002162315	1	0	0	0	0	0	1	0	2
RS_GCF_000282035.1	d__Bacteria	p__Proteobacteria	c__Alphaproteobacteria	o__Rhizobiales	f__Rhizobiaceae	g__Rhizobium	s__Rhizobium sp000282035	2	0	0	0	0	0	0	0	2
GB_GCA_002419965.1	d__Bacteria	p__Proteobacteria	c__Gammaproteobacteria	o__Pseudomonadales	f__Pseudomonadaceae	g__Pseudomonas_E	s__Pseudomonas_E sp002419965	2	0	0	0	0	0	0	0	2
RS_GCF_001544655.2	d__Bacteria	p__Proteobacteria	c__Gammaproteobacteria	o__Burkholderiales	f__Burkholderiaceae	g__Caballeronia	s__Caballeronia turbans	2	0	0	0	0	0	0	0	2
RS_GCF_900162615.1	d__Bacteria	p__Firmicutes	c__Bacilli	o__Bacillales	f__Amphibacillaceae	g__Virgibacillus	s__Virgibacillus proomii	1	0	0	1	0	0	0	0	2
RS_GCF_000682755.1	d__Bacteria	p__Proteobacteria	c__Alphaproteobacteria	o__Caulobacterales	f__Hyphomonadaceae	g__Hyphomonas	s__Hyphomonas beringensis	2	0	0	0	0	0	0	0	2
RS_GCF_000182745.2	d__Bacteria	p__Proteobacteria	c__Alphaproteobacteria	o__Acetobacterales	f__Acetobacteraceae	g__Komagataeibacter	s__Komagataeibacter medellinensis	2	0	0	0	0	0	0	0	2
RS_GCF_000379045.1	d__Bacteria	p__Proteobacteria	c__Alphaproteobacteria	o__Sphingomonadales	f__Sphingomonadaceae	g__Sphingomonas	s__Sphingomonas melonis	2	0	0	0	0	0	0	0	2
RS_GCF_002113045.1	d__Bacteria	p__Proteobacteria	c__Gammaproteobacteria	o__Pseudomonadales	f__Pseudomonadaceae	g__Pseudomonas_E	s__Pseudomonas_E sp002113045	2	0	0	0	0	0	0	0	2
GB_GCA_900095395.1	d__Bacteria	p__Desulfobacterota_A	c__Desulfovibrionia	o__Desulfovibrionales	f__Desulfovibrionaceae	g__Desulfovibrio	s__Desulfovibrio sp900095395	1	0	0	0	0	0	1	0	2
GB_GCA_002747135.1	d__Bacteria	p__Desulfobacterota	c__Desulfobulbia	o__Desulfobulbales	f__Desulfobulbaceae	g__Desulfobulbus_A	s__Desulfobulbus_A propionicus_A	1	0	0	0	0	0	1	0	2
RS_GCF_001499965.1	d__Bacteria	p__Actinobacteriota	c__Actinobacteria	o__Mycobacteriales	f__Mycobacteriaceae	g__Mycolicibacterium	s__Mycolicibacterium sp001499965	1	0	1	0	0	0	0	0	2
GB_GCA_003133065.1	d__Bacteria	p__Proteobacteria	c__Alphaproteobacteria	o__Acetobacterales	f__Acetobacteraceae	g__BOG-908	s__BOG-908 sp003133065	2	0	0	0	0	0	0	0	2
RS_GCF_000688235.1	d__Bacteria	p__Proteobacteria	c__Alphaproteobacteria	o__Rhodospirillales_A	f__Terasakiellaceae	g__Terasakiella	s__Terasakiella pusilla	2	0	0	0	0	0	0	0	2
RS_GCF_000686925.1	d__Bacteria	p__Proteobacteria	c__Gammaproteobacteria	o__Pseudomonadales	f__Halomonadaceae	g__Halomonas	s__Halomonas sp000686925	2	0	0	0	0	0	0	0	2
RS_GCF_003031265.1	d__Bacteria	p__Proteobacteria	c__Alphaproteobacteria	o__Rhizobiales	f__Xanthobacteraceae	g__Rhodopseudomonas	s__Rhodopseudomonas palustris_H	2	0	0	0	0	0	0	0	2
RS_GCF_001592875.1	d__Bacteria	p__Proteobacteria	c__Gammaproteobacteria	o__Pseudomonadales	f__Pseudomonadaceae	g__Pseudomonas_E	s__Pseudomonas_E sp001592875	2	0	0	0	0	0	0	0	2
RS_GCF_900087055.1	d__Bacteria	p__Proteobacteria	c__Gammaproteobacteria	o__Enterobacterales	f__Enterobacteriaceae	g__Plesiomonas	s__Plesiomonas shigelloides	2	0	0	0	0	0	0	0	2
RS_GCF_000520755.1	d__Bacteria	p__Firmicutes_I	c__Bacilli_A	o__Paenibacillales	f__Paenibacillaceae	g__Paenibacillus	s__Paenibacillus sp000520755	1	0	0	1	0	0	0	0	2
RS_GCF_002222055.1	d__Bacteria	p__Bacteroidota	c__Bacteroidia	o__Flavobacteriales	f__Flavobacteriaceae	g__Flavobacterium	s__Flavobacterium araucananum	1	0	0	0	0	0	1	0	2
RS_GCF_001647675.1	d__Bacteria	p__Proteobacteria	c__Gammaproteobacteria	o__Pseudomonadales	f__Moraxellaceae	g__Acinetobacter	s__Acinetobacter sp001647675	2	0	0	0	0	0	0	0	2
RS_GCF_000948285.1	d__Bacteria	p__Firmicutes	c__Bacilli	o__Bacillales	f__Anoxybacillaceae	g__Geobacillus	s__Geobacillus thermoleovorans_A	0	0	0	2	0	0	0	0	2
RS_GCF_000716755.1	d__Bacteria	p__Actinobacteriota	c__Actinobacteria	o__Mycobacteriales	f__Pseudonocardiaceae	g__Saccharothrix	s__Saccharothrix syringae	2	0	0	0	0	0	0	0	2
GB_GCA_003524365.1	d__Bacteria	p__Proteobacteria	c__Gammaproteobacteria	o__Pseudomonadales	f__Cellvibrionaceae	g__Cellvibrio	s__Cellvibrio sp003524365	2	0	0	0	0	0	0	0	2
GB_GCA_002338065.1	d__Bacteria	p__Proteobacteria	c__Gammaproteobacteria	o__Pseudomonadales	f__Pseudomonadaceae	g__Pseudomonas_E	s__Pseudomonas_E sp002338065	2	0	0	0	0	0	0	0	2
GB_GCA_003140115.1	d__Bacteria	p__Actinobacteriota	c__Actinobacteria	o__Streptosporangiales	f__Streptosporangiaceae	g__Palsa-504	s__Palsa-504 sp003140115	1	0	1	0	0	0	0	0	2
RS_GCF_003226135.1	d__Bacteria	p__Proteobacteria	c__Gammaproteobacteria	o__Enterobacterales	f__Enterobacteriaceae	g__Providencia	s__Providencia rettgeri_D	2	0	0	0	0	0	0	0	2
GB_GCA_001878715.1	d__Bacteria	p__Proteobacteria	c__Gammaproteobacteria	o__Pseudomonadales	f__Pseudomonadaceae	g__Pseudomonas_E	s__Pseudomonas_E fluorescens_G	2	0	0	0	0	0	0	0	2
RS_GCF_900188205.1	d__Bacteria	p__Actinobacteriota	c__Actinobacteria	o__Mycobacteriales	f__Geodermatophilaceae	g__Geodermatophilus	s__Geodermatophilus saharensis	2	0	0	0	0	0	0	0	2
RS_GCF_002632585.1	d__Bacteria	p__Proteobacteria	c__Gammaproteobacteria	o__Enterobacterales	f__Enterobacteriaceae	g__Xenorhabdus	s__Xenorhabdus szentirmaii	2	0	0	0	0	0	0	0	2
GB_GCA_002095375.1	d__Bacteria	p__Proteobacteria	c__Gammaproteobacteria	o__Enterobacterales	f__Enterobacteriaceae	g__Pantoea	s__Pantoea deleyi	2	0	0	0	0	0	0	0	2
RS_GCF_002844595.1	d__Bacteria	p__Proteobacteria	c__Alphaproteobacteria	o__Rhizobiales	f__Pleomorphomonadaceae	g__Pleomorphomonas	s__Pleomorphomonas diazotrophica	2	0	0	0	0	0	0	0	2
RS_GCF_000317205.1	d__Bacteria	p__Cyanobacteria	c__Cyanobacteriia	o__Cyanobacteriales	f__Nostocaceae	g__Fischerella	s__Fischerella muscicola_B	2	0	0	0	0	0	0	0	2
RS_GCF_000255655.1	d__Bacteria	p__Planctomycetota	c__Planctomycetes	o__Planctomycetales	f__Planctomycetaceae	g__Schlesneria	s__Schlesneria paludicola	1	0	0	0	0	0	1	0	2
RS_GCF_000765155.1	d__Bacteria	p__Proteobacteria	c__Gammaproteobacteria	o__Pseudomonadales	f__Pseudomonadaceae	g__Pseudomonas_A	s__Pseudomonas_A sp000765155	2	0	0	0	0	0	0	0	2
RS_GCF_001651035.1	d__Bacteria	p__Proteobacteria	c__Gammaproteobacteria	o__Pseudomonadales	f__Halomonadaceae	g__Halomonas	s__Halomonas sp001651035	2	0	0	0	0	0	0	0	2
GB_GCA_000615245.1	d__Bacteria	p__Firmicutes	c__Bacilli	o__Lactobacillales	f__Lactobacillaceae	g__Lactobacillus_C	s__Lactobacillus_C rhamnosus	2	0	0	0	0	0	0	0	2
RS_GCF_002799095.1	d__Bacteria	p__Proteobacteria	c__Gammaproteobacteria	o__Xanthomonadales	f__Xanthomonadaceae	g__Stenotrophomonas	s__Stenotrophomonas maltophilia_A	2	0	0	0	0	0	0	0	2
RS_GCF_000488255.1	d__Bacteria	p__Proteobacteria	c__Gammaproteobacteria	o__Pseudomonadales	f__Moraxellaceae	g__Acinetobacter	s__Acinetobacter indicus	2	0	0	0	0	0	0	0	2
RS_GCF_001562055.1	d__Bacteria	p__Proteobacteria	c__Alphaproteobacteria	o__Rhizobiales	f__Stappiaceae	g__Pseudovibrio	s__Pseudovibrio stylochi	2	0	0	0	0	0	0	0	2
RS_GCF_000696575.1	d__Bacteria	p__Proteobacteria	c__Gammaproteobacteria	o__Enterobacterales	f__Enterobacteriaceae	g__Siccibacter	s__Siccibacter colletis	2	0	0	0	0	0	0	0	2
RS_GCF_001957165.1	d__Bacteria	p__Proteobacteria	c__Gammaproteobacteria	o__Enterobacterales	f__Vibrionaceae	g__Vibrio	s__Vibrio ostreicida	2	0	0	0	0	0	0	0	2
RS_GCF_001854525.1	d__Bacteria	p__Actinobacteriota	c__Actinobacteria	o__Mycobacteriales	f__Mycobacteriaceae	g__Mycobacterium_A	s__Mycobacterium_A talmoniae	2	0	0	0	0	0	0	0	2
RS_GCF_000308715.1	d__Bacteria	p__Actinobacteriota	c__Actinobacteria	o__Mycobacteriales	f__Mycobacteriaceae	g__Nocardia	s__Nocardia tenerifensis	2	0	0	0	0	0	0	0	2
RS_GCF_002104515.1	d__Bacteria	p__Proteobacteria	c__Gammaproteobacteria	o__Enterobacterales	f__Alteromonadaceae	g__Colwellia	s__Colwellia polaris	2	0	0	0	0	0	0	0	2
RS_GCF_000183725.1	d__Bacteria	p__Campylobacterota	c__Campylobacteria	o__Campylobacterales	f__Sulfurimonadaceae	g__Sulfuricurvum	s__Sulfuricurvum kujiense	1	0	0	0	0	0	1	0	2
RS_GCF_001746365.1	d__Bacteria	p__Actinobacteriota	c__Actinobacteria	o__Streptomycetales	f__Streptomycetaceae	g__Streptomyces	s__Streptomyces sp001746365	1	0	1	0	0	0	0	0	2
GB_GCA_003446655.1	d__Bacteria	p__Proteobacteria	c__Gammaproteobacteria	o__Burkholderiales	f__Rhodocyclaceae	g__Thauera	s__Thauera sp003446655	2	0	0	0	0	0	0	0	2
RS_GCF_002128405.1	d__Bacteria	p__Firmicutes	c__Bacilli	o__Bacillales	f__Bacillaceae_G	g__Bacillus_AW	s__Bacillus_AW solisilvae	1	0	0	1	0	0	0	0	2
GB_GCA_003152055.1	d__Bacteria	p__Proteobacteria	c__Gammaproteobacteria	o__Burkholderiales	f__Burkholderiaceae	g__Rhizobacter	s__Rhizobacter sp003152055	2	0	0	0	0	0	0	0	2
RS_GCF_000725555.1	d__Bacteria	p__Actinobacteriota	c__Actinobacteria	o__Streptomycetales	f__Streptomycetaceae	g__Streptomyces	s__Streptomyces erythrochromogenes	1	0	1	0	0	0	0	0	2
RS_GCF_000262755.1	d__Bacteria	p__Firmicutes	c__Bacilli	o__Bacillales	f__Bacillaceae_A	g__Bacillus_Z	s__Bacillus_Z methanolicus	1	0	0	1	0	0	0	0	2
RS_GCF_900199695.1	d__Bacteria	p__Firmicutes	c__Bacilli	o__Bacillales	f__Bacillaceae_A	g__Bacillus_AC	s__Bacillus_AC sp900199695	1	0	0	1	0	0	0	0	2
RS_GCF_000307775.2	d__Bacteria	p__Proteobacteria	c__Gammaproteobacteria	o__Pseudomonadales	f__Pseudomonadaceae	g__Pseudomonas_A	s__Pseudomonas_A stutzeri_B	2	0	0	0	0	0	0	0	2
RS_GCF_001656035.1	d__Bacteria	p__Proteobacteria	c__Gammaproteobacteria	o__Enterobacterales	f__Enterobacteriaceae	g__Yersinia	s__Yersinia entomophaga	2	0	0	0	0	0	0	0	2
RS_GCF_002797495.1	d__Bacteria	p__Actinobacteriota	c__Actinobacteria	o__Propionibacteriales	f__Nocardioidaceae	g__Mumia	s__Mumia flava	2	0	0	0	0	0	0	0	2
RS_GCF_000764555.1	d__Bacteria	p__Proteobacteria	c__Gammaproteobacteria	o__Francisellales	f__Francisellaceae	g__Francisella	s__Francisella sp000764555	2	0	0	0	0	0	0	0	2
RS_GCF_000764655.1	d__Bacteria	p__Proteobacteria	c__Gammaproteobacteria	o__Enterobacterales	f__Aeromonadaceae	g__Aeromonas	s__Aeromonas aquatica	2	0	0	0	0	0	0	0	2
RS_GCF_001425785.1	d__Bacteria	p__Proteobacteria	c__Gammaproteobacteria	o__Burkholderiales	f__Burkholderiaceae	g__Rhizobacter	s__Rhizobacter sp001425785	2	0	0	0	0	0	0	0	2
RS_GCF_000336385.2	d__Bacteria	p__Proteobacteria	c__Gammaproteobacteria	o__Xanthomonadales	f__Xanthomonadaceae	g__Lysobacter	s__Lysobacter antibioticus_A	2	0	0	0	0	0	0	0	2
RS_GCF_003030985.1	d__Bacteria	p__Proteobacteria	c__Gammaproteobacteria	o__Xanthomonadales	f__Xanthomonadaceae	g__Stenotrophomonas	s__Stenotrophomonas maltophilia_AM	2	0	0	0	0	0	0	0	2
RS_GCF_002869765.1	d__Bacteria	p__Deinococcota	c__Deinococci	o__Deinococcales	f__Deinococcaceae	g__Deinococcus	s__Deinococcus planocerae	2	0	0	0	0	0	0	0	2
RS_GCF_900088415.1	d__Bacteria	p__Proteobacteria	c__Gammaproteobacteria	o__Enterobacterales	f__Vibrionaceae	g__Vibrio	s__Vibrio mediterranei	2	0	0	0	0	0	0	0	2
RS_GCF_000023025.1	d__Bacteria	p__Proteobacteria	c__Gammaproteobacteria	o__Pseudomonadales	f__Cellvibrionaceae	g__Teredinibacter	s__Teredinibacter turnerae_B	2	0	0	0	0	0	0	0	2
RS_GCF_900104095.1	d__Bacteria	p__Proteobacteria	c__Gammaproteobacteria	o__Burkholderiales	f__Burkholderiaceae	g__Cupriavidus	s__Cupriavidus sp900104095	2	0	0	0	0	0	0	0	2
RS_GCF_003144405.1	d__Bacteria	p__Proteobacteria	c__Gammaproteobacteria	o__Enterobacterales	f__Enterobacteriaceae	g__Proteus	s__Proteus sp003144405	2	0	0	0	0	0	0	0	2
GB_GCA_002479325.1	d__Bacteria	p__Proteobacteria	c__Alphaproteobacteria	o__Caulobacterales	f__Caulobacteraceae	g__Brevundimonas	s__Brevundimonas sp002479325	2	0	0	0	0	0	0	0	2
RS_GCF_002362315.1	d__Bacteria	p__Proteobacteria	c__Gammaproteobacteria	o__Burkholderiales	f__Burkholderiaceae	g__Paraburkholderia	s__Paraburkholderia acidophila	2	0	0	0	0	0	0	0	2
RS_GCF_000820185.1	d__Bacteria	p__Proteobacteria	c__Gammaproteobacteria	o__Enterobacterales	f__Aeromonadaceae	g__Aeromonas	s__Aeromonas tecta	2	0	0	0	0	0	0	0	2
RS_GCF_002250055.1	d__Bacteria	p__Firmicutes	c__Bacilli	o__Bacillales	f__Bacillaceae_I	g__Bacillus_AU	s__Bacillus_AU cohnii	0	0	0	2	0	0	0	0	2
RS_GCF_001723285.1	d__Bacteria	p__Proteobacteria	c__Alphaproteobacteria	o__Rhizobiales	f__Methyloligellaceae	g__Methyloceanibacter	s__Methyloceanibacter methanicus	1	0	0	0	0	0	1	0	2
RS_GCF_001550375.1	d__Bacteria	p__Actinobacteriota	c__Actinobacteria	o__Streptomycetales	f__Streptomycetaceae	g__Streptomyces	s__Streptomyces europaeiscabiei	1	0	1	0	0	0	0	0	2
RS_GCF_000734975.2	d__Bacteria	p__Proteobacteria	c__Gammaproteobacteria	o__Pseudomonadales	f__Halomonadaceae	g__Halomonas	s__Halomonas sp000734975	2	0	0	0	0	0	0	0	2
RS_GCF_900156395.1	d__Bacteria	p__Proteobacteria	c__Gammaproteobacteria	o__Legionellales	f__Legionellaceae	g__Legionella	s__Legionella gormanii	2	0	0	0	0	0	0	0	2
RS_GCF_000974445.1	d__Bacteria	p__Actinobacteriota	c__Actinobacteria	o__Mycobacteriales	f__Pseudonocardiaceae	g__Lentzea	s__Lentzea aerocolonigenes	2	0	0	0	0	0	0	0	2
RS_GCF_000383895.1	d__Bacteria	p__Proteobacteria	c__Gammaproteobacteria	o__Burkholderiales	f__Burkholderiaceae	g__Duganella	s__Duganella zoogloeoides	2	0	0	0	0	0	0	0	2
GB_GCA_003222065.1	d__Bacteria	p__Gemmatimonadota	c__Gemmatimonadetes	o__Gemmatimonadales	f__Gemmatimonadaceae	g__AG2	s__AG2 sp003222065	0	0	1	0	0	0	0	1	2
RS_GCF_000760735.1	d__Bacteria	p__Actinobacteriota	c__Actinobacteria	o__Mycobacteriales	f__Mycobacteriaceae	g__Rhodococcus	s__Rhodococcus fascians_E	2	0	0	0	0	0	0	0	2
RS_GCF_000833605.1	d__Bacteria	p__Firmicutes	c__Bacilli	o__Bacillales	f__Anoxybacillaceae	g__Anoxybacillus	s__Anoxybacillus ayderensis	1	0	0	1	0	0	0	0	2
RS_GCF_001693385.1	d__Bacteria	p__Proteobacteria	c__Alphaproteobacteria	o__Rhizobiales	f__Xanthobacteraceae	g__Bradyrhizobium	s__Bradyrhizobium icense	2	0	0	0	0	0	0	0	2
RS_GCF_002150765.1	d__Bacteria	p__Actinobacteriota	c__Actinobacteria	o__Mycobacteriales	f__Pseudonocardiaceae	g__Lentzea	s__Lentzea kentuckyensis	2	0	0	0	0	0	0	0	2
RS_GCF_000227685.2	d__Bacteria	p__Proteobacteria	c__Gammaproteobacteria	o__Ectothiorhodospirales	f__Thioalkalivibrionaceae	g__Thioalkalivibrio_B	s__Thioalkalivibrio_B paradoxus	1	0	0	0	0	0	1	0	2
RS_GCF_002119215.1	d__Bacteria	p__Actinobacteriota	c__Actinobacteria	o__Mycobacteriales	f__Pseudonocardiaceae	g__Pseudonocardia	s__Pseudonocardia autotrophica	2	0	0	0	0	0	0	0	2
RS_GCF_003002065.1	d__Bacteria	p__Actinobacteriota	c__Actinobacteria	o__Mycobacteriales	f__Micromonosporaceae	g__Actinoplanes	s__Actinoplanes ferrugineum	2	0	0	0	0	0	0	0	2
RS_GCF_002000025.1	d__Bacteria	p__Proteobacteria	c__Gammaproteobacteria	o__Enterobacterales	f__Alteromonadaceae	g__Colwellia	s__Colwellia aestuarii	2	0	0	0	0	0	0	0	2
RS_GCF_000293785.1	d__Bacteria	p__Proteobacteria	c__Alphaproteobacteria	o__Rhizobiales	f__Xanthobacteraceae	g__Rhodoplanes	s__Rhodoplanes sp000293785	2	0	0	0	0	0	0	0	2
GB_GCA_003133225.1	d__Bacteria	p__Proteobacteria	c__Gammaproteobacteria	o__Burkholderiales	f__Burkholderiaceae	g__PALSA-998	s__PALSA-998 sp003133225	2	0	0	0	0	0	0	0	2
RS_GCF_000312105.1	d__Bacteria	p__Actinobacteriota	c__Actinobacteria	o__Propionibacteriales	f__Nocardioidaceae	g__Aeromicrobium_A	s__Aeromicrobium_A massiliense	1	0	1	0	0	0	0	0	2
RS_GCF_900111835.1	d__Bacteria	p__Proteobacteria	c__Gammaproteobacteria	o__Pseudomonadales	f__Pseudomonadaceae	g__Pseudomonas_F	s__Pseudomonas_F otitidis	2	0	0	0	0	0	0	0	2
RS_GCF_002968835.1	d__Bacteria	p__Firmicutes_I	c__Bacilli_A	o__Paenibacillales	f__Paenibacillaceae	g__Paenibacillus	s__Paenibacillus sp002968835	1	0	0	1	0	0	0	0	2
RS_GCF_000764645.1	d__Bacteria	p__Proteobacteria	c__Gammaproteobacteria	o__Enterobacterales	f__Aeromonadaceae	g__Aeromonas	s__Aeromonas finlandiensis	2	0	0	0	0	0	0	0	2
RS_GCF_000612545.1	d__Bacteria	p__Actinobacteriota	c__Actinobacteria	o__Streptomycetales	f__Streptomycetaceae	g__Streptomyces	s__Streptomyces sp000612545	1	0	1	0	0	0	0	0	2
RS_GCF_000813425.1	d__Bacteria	p__Firmicutes	c__Bacilli	o__Bacillales_A	f__Planococcaceae	g__Sporosarcina_A	s__Sporosarcina_A sp000813425	1	0	0	1	0	0	0	0	2
RS_GCF_000422425.1	d__Bacteria	p__Proteobacteria	c__Gammaproteobacteria	o__Pseudomonadales	f__Halomonadaceae	g__Oceanospirillum	s__Oceanospirillum beijerinckii	2	0	0	0	0	0	0	0	2
RS_GCF_000092245.1	d__Bacteria	p__Campylobacterota	c__Campylobacteria	o__Campylobacterales	f__Arcobacteraceae	g__Arcobacter	s__Arcobacter nitrofigilis	1	0	0	0	0	0	1	0	2
RS_GCF_000963945.1	d__Bacteria	p__Proteobacteria	c__Alphaproteobacteria	o__Acetobacterales	f__Acetobacteraceae	g__Acetobacter	s__Acetobacter indonesiensis	2	0	0	0	0	0	0	0	2
RS_GCF_000314895.2	d__Bacteria	p__Proteobacteria	c__Gammaproteobacteria	o__Enterobacterales	f__Enterobacteriaceae	g__Providencia	s__Providencia sneebia	2	0	0	0	0	0	0	0	2
RS_GCF_900107975.1	d__Bacteria	p__Firmicutes_I	c__Bacilli_A	o__Paenibacillales	f__Paenibacillaceae	g__Paenibacillus_F	s__Paenibacillus_F sp900107975	0	0	0	2	0	0	0	0	2
RS_GCF_000576305.1	d__Bacteria	p__Firmicutes_I	c__Bacilli_A	o__Paenibacillales	f__Paenibacillaceae	g__Paenibacillus	s__Paenibacillus pini	1	0	0	1	0	0	0	0	2
RS_GCF_000336255.1	d__Bacteria	p__Proteobacteria	c__Gammaproteobacteria	o__Enterobacterales	f__Enterobacteriaceae	g__Erwinia	s__Erwinia toletana	2	0	0	0	0	0	0	0	2
RS_GCF_000308415.1	d__Bacteria	p__Actinobacteriota	c__Actinobacteria	o__Mycobacteriales	f__Mycobacteriaceae	g__Nocardia	s__Nocardia asiatica	1	0	1	0	0	0	0	0	2
RS_GCF_001654925.1	d__Bacteria	p__Proteobacteria	c__Gammaproteobacteria	o__Enterobacterales	f__Enterobacteriaceae	g__Buttiauxella	s__Buttiauxella brennerae	2	0	0	0	0	0	0	0	2
RS_GCF_000423865.1	d__Bacteria	p__Nitrospirota	c__Thermodesulfovibrionia	o__Thermodesulfovibrionales	f__Thermodesulfovibrionaceae	g__Thermodesulfovibrio	s__Thermodesulfovibrio thiophilus	1	0	0	0	0	0	1	0	2
RS_GCF_001484625.1	d__Bacteria	p__Actinobacteriota	c__Actinobacteria	o__Streptomycetales	f__Streptomycetaceae	g__Streptomyces	s__Streptomyces kanasensis	2	0	0	0	0	0	0	0	2
RS_GCF_002577195.1	d__Bacteria	p__Firmicutes	c__Bacilli	o__Bacillales	f__Bacillaceae_G	g__Bacillus_AW	s__Bacillus_AW sp002577195	1	0	0	1	0	0	0	0	2
GB_GCA_001898625.1	d__Bacteria	p__Proteobacteria	c__Gammaproteobacteria	o__Burkholderiales	f__Burkholderiaceae	g__Pigmentiphaga	s__Pigmentiphaga sp001898625	2	0	0	0	0	0	0	0	2
GB_GCA_003524305.1	d__Bacteria	p__Chloroflexota	c__Anaerolineae	o__Anaerolineales	f__Anaerolineaceae	g__UBA6107	s__UBA6107 sp003524305	2	0	0	0	0	0	0	0	2
RS_GCF_000248355.1	d__Bacteria	p__Proteobacteria	c__Gammaproteobacteria	o__Pseudomonadales	f__Moraxellaceae	g__Acinetobacter	s__Acinetobacter lwoffii	2	0	0	0	0	0	0	0	2
RS_GCF_001425625.1	d__Bacteria	p__Proteobacteria	c__Alphaproteobacteria	o__Rhizobiales	f__Rhizobiaceae	g__Mesorhizobium	s__Mesorhizobium sp001425625	2	0	0	0	0	0	0	0	2
GB_GCA_000716465.1	d__Bacteria	p__Actinobacteriota	c__Actinobacteria	o__Streptomycetales	f__Streptomycetaceae	g__Streptomyces	s__Streptomyces bikiniensis	2	0	0	0	0	0	0	0	2
RS_GCF_002632725.1	d__Bacteria	p__Proteobacteria	c__Gammaproteobacteria	o__Enterobacterales	f__Enterobacteriaceae	g__Xenorhabdus	s__Xenorhabdus hominickii	2	0	0	0	0	0	0	0	2
RS_GCF_002289455.1	d__Bacteria	p__Cyanobacteria	c__Cyanobacteriia	o__Cyanobacteriales	f__Nostocaceae	g__Calothrix	s__Calothrix elsteri	2	0	0	0	0	0	0	0	2
GB_GCA_003542385.1	d__Bacteria	p__Desulfobacterota_A	c__Desulfovibrionia	o__Desulfovibrionales	f__Desulfomicrobiaceae	g__Desulfomicrobium	s__Desulfomicrobium sp003542385	1	0	0	0	0	0	1	0	2
RS_GCF_002324875.1	d__Bacteria	p__Proteobacteria	c__Gammaproteobacteria	o__Xanthomonadales	f__Xanthomonadaceae	g__Luteimonas	s__Luteimonas sp002324875	2	0	0	0	0	0	0	0	2
RS_GCF_000720965.1	d__Bacteria	p__Actinobacteriota	c__Actinobacteria	o__Mycobacteriales	f__Micromonosporaceae	g__Actinocatenispora	s__Actinocatenispora sera	2	0	0	0	0	0	0	0	2
RS_GCF_002879875.1	d__Bacteria	p__Proteobacteria	c__Gammaproteobacteria	o__Burkholderiales	f__Burkholderiaceae	g__Paraburkholderia_E	s__Paraburkholderia_E caryophylli	2	0	0	0	0	0	0	0	2
RS_GCF_002927045.1	d__Bacteria	p__Proteobacteria	c__Gammaproteobacteria	o__Burkholderiales	f__Burkholderiaceae	g__Paraburkholderia_C	s__Paraburkholderia_C endofungorum	2	0	0	0	0	0	0	0	2
GB_GCA_001263235.1	d__Bacteria	p__Proteobacteria	c__Gammaproteobacteria	o__Burkholderiales	f__Burkholderiaceae	g__Rhizobacter	s__Rhizobacter sp001263235	2	0	0	0	0	0	0	0	2
RS_GCF_000973125.1	d__Bacteria	p__Proteobacteria	c__Gammaproteobacteria	o__Enterobacterales	f__Enterobacteriaceae	g__Xenorhabdus	s__Xenorhabdus bovienii_A	2	0	0	0	0	0	0	0	2
RS_GCF_003057615.1	d__Bacteria	p__Firmicutes	c__Bacilli	o__Bacillales_A	f__Planococcaceae	g__Lysinibacillus_E	s__Lysinibacillus_E jejuensis	1	0	0	0	0	0	1	0	2
RS_GCF_002760655.1	d__Bacteria	p__Proteobacteria	c__Gammaproteobacteria	o__Burkholderiales	f__Burkholderiaceae	g__Massilia_B	s__Massilia_B eurypsychrophila	2	0	0	0	0	0	0	0	2
RS_GCF_000308575.1	d__Bacteria	p__Actinobacteriota	c__Actinobacteria	o__Mycobacteriales	f__Mycobacteriaceae	g__Nocardia	s__Nocardia exalbida	1	0	1	0	0	0	0	0	2
RS_GCF_000820105.1	d__Bacteria	p__Proteobacteria	c__Gammaproteobacteria	o__Enterobacterales	f__Aeromonadaceae	g__Aeromonas	s__Aeromonas schubertii	2	0	0	0	0	0	0	0	2
GB_GCA_002427815.1	d__Bacteria	p__Proteobacteria	c__Gammaproteobacteria	o__Burkholderiales	f__Burkholderiaceae	g__Ramlibacter	s__Ramlibacter tataouinensis_A	2	0	0	0	0	0	0	0	2
RS_GCF_900110735.1	d__Bacteria	p__Actinobacteriota	c__Actinobacteria	o__Streptomycetales	f__Streptomycetaceae	g__Streptomyces	s__Streptomyces radiopugnans	2	0	0	0	0	0	0	0	2
RS_GCF_900115335.1	d__Bacteria	p__Proteobacteria	c__Alphaproteobacteria	o__Rhodobacterales	f__Rhodobacteraceae	g__Paracoccus	s__Paracoccus pantotrophus	2	0	0	0	0	0	0	0	2
RS_GCF_000368045.1	d__Bacteria	p__Proteobacteria	c__Gammaproteobacteria	o__Pseudomonadales	f__Moraxellaceae	g__Acinetobacter	s__Acinetobacter johnsonii	2	0	0	0	0	0	0	0	2
GB_GCA_001899065.1	d__Bacteria	p__Proteobacteria	c__Alphaproteobacteria	o__Rhizobiales	f__Devosiaceae	g__Devosia	s__Devosia sp001899065	2	0	0	0	0	0	0	0	2
RS_GCF_002904335.1	d__Bacteria	p__Actinobacteriota	c__Actinobacteria	o__Mycobacteriales	f__Pseudonocardiaceae	g__Amycolatopsis	s__Amycolatopsis sp002904335	2	0	0	0	0	0	0	0	2
RS_GCF_900111995.1	d__Bacteria	p__Proteobacteria	c__Gammaproteobacteria	o__Burkholderiales	f__Burkholderiaceae	g__Collimonas	s__Collimonas sp900111995	2	0	0	0	0	0	0	0	2
RS_GCF_002115725.1	d__Bacteria	p__Proteobacteria	c__Alphaproteobacteria	o__Rhodobacterales	f__Rhodobacteraceae	g__Marivita	s__Marivita cryptomonadis	2	0	0	0	0	0	0	0	2
RS_GCF_000342005.1	d__Bacteria	p__Actinobacteriota	c__Actinobacteria	o__Mycobacteriales	f__Pseudonocardiaceae	g__Amycolatopsis	s__Amycolatopsis decaplanina	2	0	0	0	0	0	0	0	2
GB_GCA_003136575.1	d__Bacteria	p__Acidobacteriota	c__Acidobacteriae	o__Bryobacterales	f__Bryobacteraceae	g__BOG-234	s__BOG-234 sp003136575	1	0	0	0	0	0	1	0	2
GB_GCA_002292165.1	d__Bacteria	p__Proteobacteria	c__Alphaproteobacteria	o__Caulobacterales	f__Caulobacteraceae	g__Brevundimonas	s__Brevundimonas sp002292165	2	0	0	0	0	0	0	0	2
GB_GCA_003517965.1	d__Bacteria	p__Desulfobacterota	c__Desulfobulbia	o__Desulfobulbales	f__Desulfurivibrionaceae	g__UBA2262	s__UBA2262 sp003517965	1	0	0	0	0	0	1	0	2
GB_GCA_001418385.1	d__Bacteria	p__Actinobacteriota	c__Actinobacteria	o__Streptomycetales	f__Streptomycetaceae	g__Streptomyces	s__Streptomyces alboniger	2	0	0	0	0	0	0	0	2
RS_GCF_003070665.1	d__Bacteria	p__Proteobacteria	c__Gammaproteobacteria	o__Legionellales	f__Legionellaceae	g__Legionella_C	s__Legionella_C taurinensis	2	0	0	0	0	0	0	0	2
RS_GCF_000411995.1	d__Bacteria	p__Actinobacteriota	c__Actinobacteria	o__Mycobacteriales	f__Pseudonocardiaceae	g__Amycolatopsis	s__Amycolatopsis orientalis_C	2	0	0	0	0	0	0	0	2
RS_GCF_900114775.1	d__Bacteria	p__Proteobacteria	c__Gammaproteobacteria	o__Pseudomonadales	f__Oleiphilaceae	g__Marinobacter	s__Marinobacter zhejiangensis	2	0	0	0	0	0	0	0	2
RS_GCF_000735605.1	d__Bacteria	p__Proteobacteria	c__Alphaproteobacteria	o__Rhizobiales	f__Beijerinckiaceae	g__Bosea	s__Bosea sp000735605	2	0	0	0	0	0	0	0	2
RS_GCF_900167065.1	d__Bacteria	p__Desulfobacterota_A	c__Desulfovibrionia	o__Desulfovibrionales	f__Desulfovibrionaceae	g__Desulfovibrio_O	s__Desulfovibrio_O bizertensis	1	0	0	0	0	0	1	0	2
RS_GCF_900105055.1	d__Bacteria	p__Actinobacteriota	c__Actinobacteria	o__Mycobacteriales	f__Pseudonocardiaceae	g__Amycolatopsis	s__Amycolatopsis lurida	2	0	0	0	0	0	0	0	2
GB_GCA_001898425.1	d__Bacteria	p__Proteobacteria	c__Alphaproteobacteria	o__Acetobacterales	f__Acetobacteraceae	g__69-11	s__69-11 sp001898425	2	0	0	0	0	0	0	0	2
RS_GCF_001512295.1	d__Bacteria	p__Proteobacteria	c__Gammaproteobacteria	o__Pseudomonadales	f__Pseudomonadaceae	g__Pseudomonas_B	s__Pseudomonas_B sp001512295	2	0	0	0	0	0	0	0	2
RS_GCF_001457595.1	d__Bacteria	p__Actinobacteriota	c__Actinobacteria	o__Mycobacteriales	f__Mycobacteriaceae	g__Mycolicibacterium	s__Mycolicibacterium smegmatis	1	0	1	0	0	0	0	0	2
RS_GCF_900104575.1	d__Bacteria	p__Firmicutes	c__Bacilli	o__Bacillales	f__Bacillaceae_A	g__Bacillus_BD	s__Bacillus_BD tuaregi	1	0	0	1	0	0	0	0	2
RS_GCF_000344615.1	d__Bacteria	p__Proteobacteria	c__Gammaproteobacteria	o__Burkholderiales	f__Burkholderiaceae	g__Janthinobacterium_A	s__Janthinobacterium_A sp000344615	2	0	0	0	0	0	0	0	2
RS_GCF_000023225.1	d__Bacteria	p__Desulfobacterota_A	c__Desulfovibrionia	o__Desulfovibrionales	f__Desulfomicrobiaceae	g__Desulfomicrobium	s__Desulfomicrobium baculatum	1	0	0	0	0	0	1	0	2
GB_GCA_001464165.1	d__Bacteria	p__Cyanobacteria	c__Vampirovibrionia	o__Obscuribacterales	f__Obscuribacteraceae	g__Ga0077546	s__Ga0077546 sp001464165	1	0	0	0	0	0	1	0	2
RS_GCF_002966775.1	d__Bacteria	p__Proteobacteria	c__Gammaproteobacteria	o__Pseudomonadales	f__Pseudomonadaceae	g__Pseudomonas_E	s__Pseudomonas_E sp002966775	2	0	0	0	0	0	0	0	2
RS_GCF_000504425.1	d__Bacteria	p__Proteobacteria	c__Alphaproteobacteria	o__Rhizobiales	f__Xanthobacteraceae	g__Rhodopseudomonas	s__Rhodopseudomonas palustris_C	2	0	0	0	0	0	0	0	2
RS_GCF_000284275.1	d__Bacteria	p__Proteobacteria	c__Alphaproteobacteria	o__Rhizobiales	f__Xanthobacteraceae	g__Bradyrhizobium	s__Bradyrhizobium sp000284275	2	0	0	0	0	0	0	0	2
RS_GCF_000708755.2	d__Bacteria	p__Firmicutes	c__Bacilli	o__Bacillales	f__Bacillaceae	g__Bacillus_P	s__Bacillus_P indicus	0	0	0	2	0	0	0	0	2
RS_GCF_003001955.1	d__Bacteria	p__Actinobacteriota	c__Actinobacteria	o__Mycobacteriales	f__Pseudonocardiaceae	g__Prauserella_C	s__Prauserella_C shujinwangii	1	0	1	0	0	0	0	0	2
RS_GCF_003072645.1	d__Bacteria	p__Proteobacteria	c__Gammaproteobacteria	o__Enterobacterales	f__DM2	g__DM2	s__DM2 sp003072645	2	0	0	0	0	0	0	0	2
RS_GCF_001931485.1	d__Bacteria	p__Proteobacteria	c__Gammaproteobacteria	o__Burkholderiales	f__Burkholderiaceae	g__Paraburkholderia	s__Paraburkholderia sp001931485	2	0	0	0	0	0	0	0	2
RS_GCF_001953635.1	d__Bacteria	p__Proteobacteria	c__Gammaproteobacteria	o__Enterobacterales	f__Alteromonadaceae	g__Alteromonas	s__Alteromonas abrolhosensis	2	0	0	0	0	0	0	0	2
RS_GCF_000092985.1	d__Bacteria	p__Actinobacteriota	c__Actinobacteria	o__Streptosporangiales	f__Streptosporangiaceae	g__Nocardiopsis	s__Nocardiopsis dassonvillei	2	0	0	0	0	0	0	0	2
RS_GCF_002356515.1	d__Bacteria	p__Proteobacteria	c__Alphaproteobacteria	o__Rhizobiales	f__Rhizobiaceae	g__Mesorhizobium	s__Mesorhizobium loti_C	2	0	0	0	0	0	0	0	2
GB_GCA_001577635.1	d__Bacteria	p__Proteobacteria	c__Gammaproteobacteria	o__Pseudomonadales	f__Halomonadaceae	g__Halomonas_C	s__Halomonas_C sp001577635	2	0	0	0	0	0	0	0	2
RS_GCF_002906255.1	d__Bacteria	p__Proteobacteria	c__Alphaproteobacteria	o__Acetobacterales	f__Acetobacteraceae	g__Komagataeibacter	s__Komagataeibacter maltaceti	2	0	0	0	0	0	0	0	2
RS_GCF_002701265.1	d__Bacteria	p__Campylobacterota	c__Campylobacteria	o__Campylobacterales	f__Arcobacteraceae	g__Malaciobacter	s__Malaciobacter molluscorum	1	0	0	0	0	0	1	0	2
RS_GCF_900103455.1	d__Bacteria	p__Actinobacteriota	c__Actinobacteria	o__Streptomycetales	f__Streptomycetaceae	g__Streptomyces	s__Streptomyces wuyuanensis	1	0	1	0	0	0	0	0	2
RS_GCF_900100155.1	d__Bacteria	p__Proteobacteria	c__Alphaproteobacteria	o__Rhizobiales	f__Xanthobacteraceae	g__Ancylobacter	s__Ancylobacter rudongensis	2	0	0	0	0	0	0	0	2
RS_GCF_000176915.2	d__Bacteria	p__Desulfobacterota_A	c__Desulfovibrionia	o__Desulfovibrionales	f__Desulfovibrionaceae	g__Pseudodesulfovibrio	s__Pseudodesulfovibrio aespoeensis	1	0	0	0	0	0	1	0	2
RS_GCF_000819785.1	d__Bacteria	p__Proteobacteria	c__Gammaproteobacteria	o__Enterobacterales	f__Aeromonadaceae	g__Aeromonas	s__Aeromonas caviae	2	0	0	0	0	0	0	0	2
RS_GCF_900113015.1	d__Bacteria	p__Actinobacteriota	c__Actinobacteria	o__Mycobacteriales	f__Micromonosporaceae	g__Actinoplanes	s__Actinoplanes philippinensis	2	0	0	0	0	0	0	0	2
RS_GCF_000987955.1	d__Bacteria	p__Firmicutes_I	c__Bacilli_A	o__Paenibacillales	f__Paenibacillaceae	g__Paenibacillus	s__Paenibacillus sp000987955	1	0	0	1	0	0	0	0	2
RS_GCF_000021745.1	d__Bacteria	p__Proteobacteria	c__Alphaproteobacteria	o__Rhizobiales	f__Beijerinckiaceae	g__Methylocella	s__Methylocella silvestris	2	0	0	0	0	0	0	0	2
RS_GCF_002849225.1	d__Bacteria	p__Actinobacteriota	c__Actinobacteria	o__Actinomycetales	f__Actinomycetaceae	g__Winkia	s__Winkia sp002849225	2	0	0	0	0	0	0	0	2
RS_GCF_001519055.1	d__Bacteria	p__Proteobacteria	c__Alphaproteobacteria	o__Sphingomonadales	f__Sphingomonadaceae	g__Novosphingobium	s__Novosphingobium sp001519055	2	0	0	0	0	0	0	0	2
GB_GCA_001443525.1	d__Bacteria	p__Desulfobacterota	c__Desulfobacteria	o__Desulfobacterales	f__Desulfatirhabdiaceae	g__RAAP-1	s__RAAP-1 sp001443525	2	0	0	0	0	0	0	0	2
GB_GCA_003242645.1	d__Bacteria	p__Proteobacteria	c__Alphaproteobacteria	o__Rhizobiales	f__Hyphomicrobiaceae	g__ZC4RG25	s__ZC4RG25 sp003242645	2	0	0	0	0	0	0	0	2
GB_GCA_002705185.1	d__Bacteria	p__Nitrospinota	c__Nitrospinia	o__Nitrospinales	f__Nitrospinaceae	g__LS-NOB	s__LS-NOB sp002705185	0	0	0	0	0	0	0	2	2
RS_GCF_000829035.1	d__Bacteria	p__Firmicutes	c__Bacilli	o__Lactobacillales	f__Lactobacillaceae	g__Lactobacillus_C	s__Lactobacillus_C paracasei	2	0	0	0	0	0	0	0	2
RS_GCF_002096055.1	d__Bacteria	p__Actinobacteriota	c__Actinobacteria	o__Actinomycetales	f__Microbacteriaceae	g__Cnuibacter	s__Cnuibacter physcomitrellae	2	0	0	0	0	0	0	0	2
RS_GCF_000023445.1	d__Bacteria	p__Desulfobacterota_A	c__Desulfovibrionia	o__Desulfovibrionales	f__Desulfovibrionaceae	g__Desulfovibrio_H	s__Desulfovibrio_H salexigens	1	0	0	0	0	0	1	0	2
RS_GCF_001653195.1	d__Bacteria	p__Firmicutes_I	c__Bacilli_A	o__Thermicanales	f__Thermicanaceae	g__Hydrogenibacillus	s__Hydrogenibacillus schlegelii	1	0	0	0	0	0	1	0	2
RS_GCF_003143935.1	d__Bacteria	p__Actinobacteriota	c__Actinobacteria	o__Streptomycetales	f__Streptomycetaceae	g__Streptomyces	s__Streptomyces sp003143935	2	0	0	0	0	0	0	0	2
RS_GCF_001469165.1	d__Bacteria	p__Proteobacteria	c__Gammaproteobacteria	o__Chromatiales	f__Chromatiaceae	g__Thiohalocapsa	s__Thiohalocapsa sp001469165	2	0	0	0	0	0	0	0	2
RS_GCF_001306995.1	d__Bacteria	p__Proteobacteria	c__Gammaproteobacteria	o__Xanthomonadales	f__Xanthomonadaceae	g__Luteimonas	s__Luteimonas sp001306995	2	0	0	0	0	0	0	0	2
RS_GCF_001941845.1	d__Bacteria	p__Actinobacteriota	c__Actinobacteria	o__Streptomycetales	f__Streptomycetaceae	g__Streptomyces	s__Streptomyces sp001941845	1	0	1	0	0	0	0	0	2
GB_GCA_001724535.1	d__Bacteria	p__Proteobacteria	c__Alphaproteobacteria	o__Rhodobacterales	f__Rhodobacteraceae	g__Paracoccus	s__Paracoccus sp001724535	2	0	0	0	0	0	0	0	2
GB_GCA_003311635.1	d__Bacteria	p__Proteobacteria	c__Alphaproteobacteria	o__Acetobacterales	f__Acetobacteraceae	g__Komagataeibacter	s__Komagataeibacter sp003311635	2	0	0	0	0	0	0	0	2
RS_GCF_900115095.1	d__Bacteria	p__Actinobacteriota	c__Actinobacteria	o__Streptosporangiales	f__Streptosporangiaceae	g__Spirillospora	s__Spirillospora madurae	2	0	0	0	0	0	0	0	2
RS_GCF_000966195.1	d__Bacteria	p__Firmicutes	c__Bacilli	o__Bacillales	f__Domibacillaceae	g__Domibacillus	s__Domibacillus robiginosus	1	0	0	1	0	0	0	0	2
GB_GCA_003096395.1	d__Bacteria	p__Proteobacteria	c__Gammaproteobacteria	o__Pseudomonadales	f__Pseudomonadaceae	g__Pseudomonas_E	s__Pseudomonas_E kilonensis_B	2	0	0	0	0	0	0	0	2
RS_GCF_001552215.1	d__Bacteria	p__Actinobacteriota	c__Actinobacteria	o__Streptosporangiales	f__Streptosporangiaceae	g__Spirillospora	s__Spirillospora macra	0	0	2	0	0	0	0	0	2
RS_GCF_001279585.1	d__Bacteria	p__Actinobacteriota	c__Actinobacteria	o__Streptosporangiales	f__Streptosporangiaceae	g__Nocardiopsis	s__Nocardiopsis sp001279585	2	0	0	0	0	0	0	0	2
RS_GCF_001906585.1	d__Bacteria	p__Actinobacteriota	c__Actinobacteria	o__Streptomycetales	f__Streptomycetaceae	g__Streptomyces	s__Streptomyces kebangsaanensis	1	0	1	0	0	0	0	0	2
RS_GCF_001424835.1	d__Bacteria	p__Proteobacteria	c__Gammaproteobacteria	o__Burkholderiales	f__Burkholderiaceae	g__Variovorax	s__Variovorax sp001424835	2	0	0	0	0	0	0	0	2
RS_GCF_000308455.1	d__Bacteria	p__Actinobacteriota	c__Actinobacteria	o__Mycobacteriales	f__Mycobacteriaceae	g__Nocardia	s__Nocardia abscessus	1	0	1	0	0	0	0	0	2
RS_GCF_002760615.1	d__Bacteria	p__Proteobacteria	c__Alphaproteobacteria	o__Rhodobacterales	f__Rhodobacteraceae	g__Puniceibacterium	s__Puniceibacterium antarcticum	2	0	0	0	0	0	0	0	2
RS_GCF_001675045.1	d__Bacteria	p__Firmicutes_I	c__Bacilli_A	o__Paenibacillales	f__Paenibacillaceae	g__Paenibacillus_C	s__Paenibacillus_C oryzae	1	0	0	1	0	0	0	0	2
RS_GCF_002927165.1	d__Bacteria	p__Proteobacteria	c__Gammaproteobacteria	o__Pseudomonadales	f__Pseudomonadaceae	g__Pseudomonas_E	s__Pseudomonas_E aeruginosa	2	0	0	0	0	0	0	0	2
RS_GCF_000262405.1	d__Bacteria	p__Proteobacteria	c__Alphaproteobacteria	o__Rhizobiales	f__Beijerinckiaceae	g__Microvirga	s__Microvirga lotononidis	2	0	0	0	0	0	0	0	2
RS_GCF_001404975.1	d__Bacteria	p__Bacteroidota	c__Bacteroidia	o__Flavobacteriales	f__Flavobacteriaceae	g__Flavobacterium	s__Flavobacterium daejeonense_A	1	0	0	0	0	0	1	0	2
RS_GCF_000219605.1	d__Bacteria	p__Proteobacteria	c__Gammaproteobacteria	o__Pseudomonadales	f__Pseudomonadaceae	g__Pseudomonas_A	s__Pseudomonas_A stutzeri	2	0	0	0	0	0	0	0	2
GB_GCA_002313655.1	d__Bacteria	p__Proteobacteria	c__Gammaproteobacteria	o__Pseudomonadales	f__Alcanivoracaceae	g__Alcanivorax	s__Alcanivorax sp002313655	2	0	0	0	0	0	0	0	2
RS_GCF_003054555.1	d__Bacteria	p__Actinobacteriota	c__Actinobacteria	o__Streptomycetales	f__Streptomycetaceae	g__Streptomyces	s__Streptomyces lunaelactis	1	0	1	0	0	0	0	0	2
RS_GCF_003217475.1	d__Bacteria	p__Actinobacteriota	c__Actinobacteria	o__Mycobacteriales	f__Mycobacteriaceae	g__Williamsia	s__Williamsia limnetica	1	0	1	0	0	0	0	0	2
RS_GCF_000382065.1	d__Bacteria	p__Proteobacteria	c__Gammaproteobacteria	o__Xanthomonadales	f__Xanthomonadaceae	g__Stenotrophomonas	s__Stenotrophomonas maltophilia_B	2	0	0	0	0	0	0	0	2
RS_GCF_900188005.1	d__Bacteria	p__Actinobacteriota	c__Actinobacteria	o__Mycobacteriales	f__Micromonosporaceae	g__Actinoplanes	s__Actinoplanes regularis	2	0	0	0	0	0	0	0	2
GB_GCA_003293815.1	d__Bacteria	p__Proteobacteria	c__Gammaproteobacteria	o__Pseudomonadales	f__Pseudomonadaceae	g__Pseudomonas_A	s__Pseudomonas_A zhaodongensis	2	0	0	0	0	0	0	0	2
RS_GCF_000962825.1	d__Bacteria	p__Actinobacteriota	c__Actinobacteria	o__Mycobacteriales	f__Micromonosporaceae	g__Actinoplanes	s__Actinoplanes rectilineatus	2	0	0	0	0	0	0	0	2
RS_GCF_002777965.1	d__Bacteria	p__Proteobacteria	c__Gammaproteobacteria	o__Enterobacterales	f__Enterobacteriaceae	g__Proteus	s__Proteus columbae	2	0	0	0	0	0	0	0	2
RS_GCF_000092905.1	d__Bacteria	p__Firmicutes_K	c__Alicyclobacillia	o__Kyrpidiales	f__Kyrpidiaceae	g__Kyrpidia	s__Kyrpidia tusciae	1	0	0	0	0	0	1	0	2
RS_GCF_002798385.1	d__Bacteria	p__Actinobacteriota	c__Actinobacteria	o__Mycobacteriales	f__Mycobacteriaceae	g__Mycolicibacterium	s__Mycolicibacterium goodii_A	1	0	1	0	0	0	0	0	2
RS_GCF_900103325.1	d__Bacteria	p__Proteobacteria	c__Alphaproteobacteria	o__Rhizobiales	f__Rhizobiaceae	g__Mesorhizobium	s__Mesorhizobium qingshengii	2	0	0	0	0	0	0	0	2
RS_GCF_900156535.1	d__Bacteria	p__Proteobacteria	c__Alphaproteobacteria	o__Rhodobacterales	f__Rhodobacteraceae	g__Roseovarius	s__Roseovarius nanhaiticus	2	0	0	0	0	0	0	0	2
RS_GCF_001425575.1	d__Bacteria	p__Proteobacteria	c__Alphaproteobacteria	o__Rhizobiales	f__Rhizobiaceae	g__Leaf443	s__Leaf443 sp001425575	2	0	0	0	0	0	0	0	2
RS_GCF_001431665.1	d__Bacteria	p__Proteobacteria	c__Gammaproteobacteria	o__Xanthomonadales	f__Xanthomonadaceae	g__Stenotrophomonas	s__Stenotrophomonas maltophilia_K	2	0	0	0	0	0	0	0	2
RS_GCF_001758725.1	d__Bacteria	p__Proteobacteria	c__Gammaproteobacteria	o__Burkholderiales	f__Burkholderiaceae	g__Janthinobacterium	s__Janthinobacterium sp001758725	2	0	0	0	0	0	0	0	2
RS_GCF_900101105.1	d__Bacteria	p__Desulfobacterota_A	c__Desulfovibrionia	o__Desulfovibrionales	f__Desulfovibrionaceae	g__Desulfovibrio_H	s__Desulfovibrio_H ferrireducens	1	0	0	0	0	0	1	0	2
RS_GCF_000820165.1	d__Bacteria	p__Proteobacteria	c__Gammaproteobacteria	o__Enterobacterales	f__Aeromonadaceae	g__Aeromonas	s__Aeromonas taiwanensis	2	0	0	0	0	0	0	0	2
RS_GCF_002795245.1	d__Bacteria	p__Proteobacteria	c__Alphaproteobacteria	o__Rhizobiales	f__Xanthobacteraceae	g__Bradyrhizobium	s__Bradyrhizobium sp002795245	2	0	0	0	0	0	0	0	2
RS_GCF_000226255.1	d__Bacteria	p__Desulfobacterota_A	c__Desulfovibrionia	o__Desulfovibrionales	f__Desulfovibrionaceae	g__Desulfovibrio_A	s__Desulfovibrio_A sp000226255	1	0	0	0	0	0	1	0	2
RS_GCF_000718135.1	d__Bacteria	p__Actinobacteriota	c__Actinobacteria	o__Streptomycetales	f__Streptomycetaceae	g__Streptomyces	s__Streptomyces cyaneofuscatus	2	0	0	0	0	0	0	0	2
RS_GCF_001580615.1	d__Bacteria	p__Proteobacteria	c__Alphaproteobacteria	o__Acetobacterales	f__Acetobacteraceae	g__Acetobacter	s__Acetobacter malorum	2	0	0	0	0	0	0	0	2
RS_GCF_900095735.1	d__Bacteria	p__Proteobacteria	c__Gammaproteobacteria	o__Burkholderiales	f__Burkholderiaceae	g__Robbsia	s__Robbsia sp900095735	2	0	0	0	0	0	0	0	2
RS_GCF_000732535.1	d__Bacteria	p__Proteobacteria	c__Gammaproteobacteria	o__Nevskiales	f__Salinisphaeraceae	g__Salinisphaera	s__Salinisphaera hydrothermalis	2	0	0	0	0	0	0	0	2
RS_GCF_000735355.1	d__Bacteria	p__Proteobacteria	c__Gammaproteobacteria	o__Enterobacterales	f__Enterobacteriaceae	g__Buttiauxella	s__Buttiauxella agrestis	2	0	0	0	0	0	0	0	2
RS_GCF_900115865.1	d__Bacteria	p__Proteobacteria	c__Alphaproteobacteria	o__Rhodobacterales	f__Rhodobacteraceae	g__Donghicola	s__Donghicola eburneus	2	0	0	0	0	0	0	0	2
GB_GCA_002868945.1	d__Bacteria	p__Desulfobacterota	c__Desulfobulbia	o__Desulfobulbales	f__Desulfurivibrionaceae	g__BM506	s__BM506 sp002868945	1	0	0	0	0	0	1	0	2
RS_GCF_900113425.1	d__Bacteria	p__Proteobacteria	c__Gammaproteobacteria	o__Xanthomonadales	f__Xanthomonadaceae	g__Stenotrophomonas	s__Stenotrophomonas maltophilia_P	2	0	0	0	0	0	0	0	2
RS_GCF_002797355.1	d__Bacteria	p__Firmicutes	c__Bacilli	o__Bacillales	f__Domibacillaceae	g__FJAT-46582	s__FJAT-46582 sp002797355	1	0	0	1	0	0	0	0	2
RS_GCF_900142595.1	d__Bacteria	p__Actinobacteriota	c__Actinobacteria	o__Streptomycetales	f__Streptomycetaceae	g__Streptomyces	s__Streptomyces yunnanensis	2	0	0	0	0	0	0	0	2
RS_GCF_003204135.1	d__Bacteria	p__Proteobacteria	c__Gammaproteobacteria	o__Enterobacterales	f__Enterobacteriaceae	g__Providencia	s__Providencia rettgeri_C	2	0	0	0	0	0	0	0	2
RS_GCF_001308265.1	d__Bacteria	p__Proteobacteria	c__Alphaproteobacteria	o__Rhodobacterales	f__Rhodobacteraceae	g__Celeribacter_A	s__Celeribacter_A marinus	2	0	0	0	0	0	0	0	2
RS_GCF_003002955.1	d__Bacteria	p__Actinobacteriota	c__Actinobacteria	o__Mycobacteriales	f__Micromonosporaceae	g__Glycomyces	s__Glycomyces artemisiae	1	0	1	0	0	0	0	0	2
RS_GCF_000963925.1	d__Bacteria	p__Proteobacteria	c__Alphaproteobacteria	o__Acetobacterales	f__Acetobacteraceae	g__Acetobacter	s__Acetobacter cibinongensis	2	0	0	0	0	0	0	0	2
RS_GCF_001580915.1	d__Bacteria	p__Proteobacteria	c__Alphaproteobacteria	o__Acetobacterales	f__Acetobacteraceae	g__Acetobacter	s__Acetobacter tropicalis	2	0	0	0	0	0	0	0	2
RS_GCF_001561915.1	d__Bacteria	p__Firmicutes_I	c__Bacilli_A	o__Tepidibacillales	f__Tepidibacillaceae	g__Tepidibacillus	s__Tepidibacillus decaturensis	1	0	0	1	0	0	0	0	2
GB_GCA_003222085.1	d__Bacteria	p__Gemmatimonadota	c__Gemmatimonadetes	o__Gemmatimonadales	f__GWC2-71-9	g__AG41	s__AG41 sp003222085	0	0	1	0	0	0	0	1	2
RS_GCF_900105805.1	d__Bacteria	p__Proteobacteria	c__Gammaproteobacteria	o__Pseudomonadales	f__Pseudomonadaceae	g__Pseudomonas_E	s__Pseudomonas_E moraviensis	2	0	0	0	0	0	0	0	2
RS_GCF_000331025.1	d__Bacteria	p__Desulfobacterota_A	c__Desulfovibrionia	o__Desulfovibrionales	f__Desulfovibrionaceae	g__Desulfovibrio_H	s__Desulfovibrio_H hydrothermalis	1	0	0	0	0	0	1	0	2
GB_GCA_001799475.1	d__Bacteria	p__Desulfobacterota_A	c__Desulfovibrionia	o__Desulfovibrionales	f__Desulfovibrionaceae	g__Desulfovibrio_P	s__Desulfovibrio_P sp001799475	1	0	0	0	0	0	1	0	2
RS_GCF_001654865.1	d__Bacteria	p__Proteobacteria	c__Gammaproteobacteria	o__Enterobacterales	f__Enterobacteriaceae	g__Buttiauxella	s__Buttiauxella noackiae	2	0	0	0	0	0	0	0	2
GB_GCA_003261635.1	d__Bacteria	p__Actinobacteriota	c__Actinobacteria	o__Propionibacteriales	f__Kribbellaceae	g__Kribbella	s__Kribbella sp003261635	2	0	0	0	0	0	0	0	2
RS_GCF_002156875.1	d__Bacteria	p__Firmicutes	c__Bacilli	o__Bacillales	f__Bacillaceae_G	g__Bacillus_AW	s__Bacillus_AW sp002156875	1	0	0	1	0	0	0	0	2
RS_GCF_000439375.1	d__Bacteria	p__Proteobacteria	c__Gammaproteobacteria	o__Enterobacterales	f__Enterobacteriaceae	g__Tatumella	s__Tatumella saanichensis	2	0	0	0	0	0	0	0	2
RS_GCF_000746395.1	d__Bacteria	p__Actinobacteriota	c__Actinobacteria	o__Streptomycetales	f__Streptomycetaceae	g__Streptomyces	s__Streptomyces mirabilis_A	1	0	1	0	0	0	0	0	2
RS_GCF_000016765.1	d__Bacteria	p__Proteobacteria	c__Alphaproteobacteria	o__Sphingomonadales	f__Sphingomonadaceae	g__Rhizorhabdus	s__Rhizorhabdus wittichii	2	0	0	0	0	0	0	0	2
RS_GCF_900114115.1	d__Bacteria	p__Desulfobacterota_A	c__Desulfovibrionia	o__Desulfovibrionales	f__Desulfomicrobiaceae	g__Desulfomicrobium	s__Desulfomicrobium apsheronum	1	0	0	0	0	0	1	0	2
RS_GCF_002002485.1	d__Bacteria	p__Proteobacteria	c__Gammaproteobacteria	o__Enterobacterales	f__Pasteurellaceae	g__GCF-002002485	s__GCF-002002485 sp002002485	2	0	0	0	0	0	0	0	2
RS_GCF_001571305.1	d__Bacteria	p__Proteobacteria	c__Gammaproteobacteria	o__Enterobacterales	f__Enterobacteriaceae	g__Erwinia	s__Erwinia persicina	2	0	0	0	0	0	0	0	2
GB_GCA_000316985.1	d__Bacteria	p__Proteobacteria	c__Gammaproteobacteria	o__Enterobacterales	f__Vibrionaceae	g__Vibrio	s__Vibrio sp000316985	2	0	0	0	0	0	0	0	2
RS_GCF_000767615.3	d__Bacteria	p__Proteobacteria	c__Gammaproteobacteria	o__Burkholderiales	f__Burkholderiaceae	g__Pandoraea	s__Pandoraea pnomenusa	2	0	0	0	0	0	0	0	2
RS_GCF_003112435.1	d__Bacteria	p__Proteobacteria	c__Gammaproteobacteria	o__Burkholderiales	f__Methylophilaceae	g__Novimethylophilus	s__Novimethylophilus kurashikiensis	2	0	0	0	0	0	0	0	2
RS_GCF_000719345.1	d__Bacteria	p__Actinobacteriota	c__Actinobacteria	o__Streptomycetales	f__Streptomycetaceae	g__Streptomyces	s__Streptomyces sp000719345	1	0	1	0	0	0	0	0	2
GB_GCA_002707605.1	d__Bacteria	p__Proteobacteria	c__Alphaproteobacteria	o__Rhizobiales	f__Rhizobiaceae	g__Hoeflea	s__Hoeflea sp002707605	2	0	0	0	0	0	0	0	2
RS_GCF_900107375.1	d__Bacteria	p__Proteobacteria	c__Gammaproteobacteria	o__Xanthomonadales	f__Xanthomonadaceae	g__Lysobacter	s__Lysobacter sp900107375	2	0	0	0	0	0	0	0	2
RS_GCF_001444295.1	d__Bacteria	p__Proteobacteria	c__Gammaproteobacteria	o__Pseudomonadales	f__Pseudomonadaceae	g__Pseudomonas_E	s__Pseudomonas_E fluorescens_BA	2	0	0	0	0	0	0	0	2
GB_GCA_002214185.1	d__Bacteria	p__Actinobacteriota	c__Actinobacteria	o__Streptomycetales	f__Streptomycetaceae	g__Streptomyces	s__Streptomyces capitiformicae	2	0	0	0	0	0	0	0	2
RS_GCF_000770675.1	d__Bacteria	p__Firmicutes	c__Bacilli	o__Bacillales	f__Halobacillaceae_A	g__Pontibacillus	s__Pontibacillus chungwhensis	0	0	0	2	0	0	0	0	2
GB_GCA_002789915.1	d__Bacteria	p__Proteobacteria	c__Gammaproteobacteria	o__Burkholderiales	f__Burkholderiaceae	g__Rhodoferax	s__Rhodoferax sp002789915	2	0	0	0	0	0	0	0	2
RS_GCF_003014735.1	d__Bacteria	p__Actinobacteriota	c__Actinobacteria	o__Mycobacteriales	f__Pseudonocardiaceae	g__Saccharothrix	s__Saccharothrix carnea	2	0	0	0	0	0	0	0	2
RS_GCF_002234405.1	d__Bacteria	p__Actinobacteriota	c__Actinobacteria	o__Mycobacteriales	f__Pseudonocardiaceae	g__Amycolatopsis	s__Amycolatopsis thailandensis	2	0	0	0	0	0	0	0	2
RS_GCF_900187115.1	d__Bacteria	p__Campylobacterota	c__Campylobacteria	o__Campylobacterales	f__Arcobacteraceae	g__Aliarcobacter	s__Aliarcobacter butzleri	1	0	0	0	0	0	1	0	2
GB_GCA_002429595.1	d__Bacteria	p__Proteobacteria	c__Gammaproteobacteria	o__UBA6002	f__UBA6002	g__UBA6002	s__UBA6002 sp002429595	2	0	0	0	0	0	0	0	2
RS_GCF_001598875.1	d__Bacteria	p__Proteobacteria	c__Gammaproteobacteria	o__Enterobacterales	f__Shewanellaceae	g__Shewanella	s__Shewanella algae	2	0	0	0	0	0	0	0	2
RS_GCF_002149965.1	d__Bacteria	p__Proteobacteria	c__Alphaproteobacteria	o__Sphingomonadales	f__Sphingomonadaceae	g__Novosphingobium	s__Novosphingobium panipatense	2	0	0	0	0	0	0	0	2
RS_GCF_002205895.1	d__Bacteria	p__Firmicutes_I	c__Bacilli_A	o__Paenibacillales	f__Paenibacillaceae	g__Saccharibacillus	s__Saccharibacillus sp002205895	1	0	0	1	0	0	0	0	2
RS_GCF_900091455.1	d__Bacteria	p__Actinobacteriota	c__Actinobacteria	o__Mycobacteriales	f__Micromonosporaceae	g__Micromonospora	s__Micromonospora coriariae	2	0	0	0	0	0	0	0	2
GB_GCA_002423615.1	d__Bacteria	p__Desulfobacterota	c__Desulfobacteria	o__Desulfobacterales	f__UBA5616	g__UBA5616	s__UBA5616 sp002423615	1	0	0	0	0	0	1	0	2
GB_GCA_002452325.1	d__Bacteria	p__Desulfuromonadota	c__Desulfuromonadia	o__Geobacterales	f__Pelobacteraceae	g__Geobacter_C	s__Geobacter_C sp002452325	1	0	0	0	0	0	1	0	2
RS_GCF_000620185.1	d__Bacteria	p__Actinobacteriota	c__Actinobacteria	o__Mycobacteriales	f__Geodermatophilaceae	g__Blastococcus	s__Blastococcus sp000620185	1	0	1	0	0	0	0	0	2
RS_GCF_002993325.1	d__Bacteria	p__Proteobacteria	c__Gammaproteobacteria	o__Enterobacterales	f__Alteromonadaceae	g__Alteromonas	s__Alteromonas gracilis	2	0	0	0	0	0	0	0	2
RS_GCF_000340985.1	d__Bacteria	p__Actinobacteriota	c__Actinobacteria	o__Streptosporangiales	f__Streptosporangiaceae	g__Nocardiopsis	s__Nocardiopsis valliformis	2	0	0	0	0	0	0	0	2
RS_GCF_002910915.1	d__Bacteria	p__Actinobacteriota	c__Actinobacteria	o__Streptomycetales	f__Streptomycetaceae	g__Streptomyces	s__Streptomyces sp002910915	1	0	1	0	0	0	0	0	2
RS_GCF_000612785.1	d__Bacteria	p__Proteobacteria	c__Gammaproteobacteria	o__Coxiellales	f__Coxiellaceae	g__Coxiella	s__Coxiella burnetii	2	0	0	0	0	0	0	0	2
RS_GCF_000942395.1	d__Bacteria	p__Firmicutes_I	c__Bacilli_A	o__Thermoactinomycetales	f__Thermoactinomycetaceae	g__Risungbinella	s__Risungbinella massiliensis	0	0	0	2	0	0	0	0	2
RS_GCF_900100955.1	d__Bacteria	p__Actinobacteriota	c__Actinobacteria	o__Mycobacteriales	f__Pseudonocardiaceae	g__Lentzea	s__Lentzea fradiae	2	0	0	0	0	0	0	0	2
RS_GCF_900114995.1	d__Bacteria	p__Bacteroidota	c__Bacteroidia	o__Chitinophagales	f__Chitinophagaceae	g__Chitinophaga	s__Chitinophaga sp900114995	0	0	1	0	0	0	1	0	2
RS_GCF_001467745.1	d__Bacteria	p__Proteobacteria	c__Gammaproteobacteria	o__Legionellales	f__Legionellaceae	g__Tatlockia	s__Tatlockia jamestowniensis	2	0	0	0	0	0	0	0	2
RS_GCF_002163975.1	d__Bacteria	p__Cyanobacteria	c__Cyanobacteriia	o__Cyanobacteriales	f__Nostocaceae	g__HT-58-2	s__HT-58-2 sp002163975	2	0	0	0	0	0	0	0	2
RS_GCF_001295975.1	d__Bacteria	p__Proteobacteria	c__Alphaproteobacteria	o__Caulobacterales	f__Caulobacteraceae	g__Brevundimonas	s__Brevundimonas sp001295975	2	0	0	0	0	0	0	0	2
RS_GCF_900155685.1	d__Bacteria	p__Firmicutes_I	c__Bacilli_A	o__Paenibacillales	f__Paenibacillaceae	g__Paenibacillus_Q	s__Paenibacillus_Q bouchesdurhonensis	1	0	0	1	0	0	0	0	2
RS_GCF_000735375.1	d__Bacteria	p__Proteobacteria	c__Gammaproteobacteria	o__Enterobacterales	f__Enterobacteriaceae	g__Hafnia	s__Hafnia alvei	2	0	0	0	0	0	0	0	2
GB_GCA_002469625.1	d__Bacteria	p__Proteobacteria	c__Gammaproteobacteria	o__Xanthomonadales	f__Xanthomonadaceae	g__Stenotrophomonas	s__Stenotrophomonas maltophilia_Z	2	0	0	0	0	0	0	0	2
RS_GCF_002797325.1	d__Bacteria	p__Firmicutes	c__Bacilli	o__Bacillales	f__Bacillaceae_D	g__Bacillus_S	s__Bacillus_S sp002797325	0	0	0	2	0	0	0	0	2
GB_GCA_001828595.1	d__Bacteria	p__Planctomycetota	c__Brocadiae	o__Brocadiales	f__Scalinduaceae	g__Scalindua	s__Scalindua sp001828595	0	0	0	0	0	0	0	2	2
RS_GCF_900091855.1	d__Bacteria	p__Actinobacteriota	c__Actinobacteria	o__Streptomycetales	f__Streptomycetaceae	g__Streptomyces_B	s__Streptomyces_B sp900091855	1	0	1	0	0	0	0	0	2
RS_GCF_000425545.1	d__Bacteria	p__Firmicutes	c__Bacilli	o__Bacillales_A	f__Planococcaceae	g__Sporosarcina	s__Sporosarcina ureae	1	0	0	1	0	0	0	0	2
GB_GCA_003250455.1	d__Bacteria	p__Chloroflexota	c__Anaerolineae	o__Anaerolineales	f__UBA11579	g__UBA11579	s__UBA11579 sp003250455	2	0	0	0	0	0	0	0	2
RS_GCF_001552155.1	d__Bacteria	p__Actinobacteriota	c__Actinobacteria	o__Streptosporangiales	f__Streptosporangiaceae	g__Spirillospora	s__Spirillospora formosensis	2	0	0	0	0	0	0	0	2
RS_GCF_001123825.1	d__Bacteria	p__Proteobacteria	c__Gammaproteobacteria	o__Enterobacterales	f__Enterobacteriaceae	g__Yersinia	s__Yersinia kristensenii_C	2	0	0	0	0	0	0	0	2
GB_GCA_003241695.1	d__Bacteria	p__Proteobacteria	c__Alphaproteobacteria	o__Rhizobiales	f__Methylopilaceae	g__Methylopila	s__Methylopila novella	2	0	0	0	0	0	0	0	2
GB_GCA_003242675.1	d__Bacteria	p__Firmicutes_E	c__Symbiobacteriia	o__Symbiobacteriales	f__Symbiobacteriaceae	g__Symbiobacterium	s__Symbiobacterium sp003242675	1	0	1	0	0	0	0	0	2
RS_GCF_002263495.1	d__Bacteria	p__Actinobacteriota	c__Actinobacteria	o__Streptosporangiales	f__Streptosporangiaceae	g__Nocardiopsis_C	s__Nocardiopsis_C gilva	2	0	0	0	0	0	0	0	2
RS_GCF_002252505.1	d__Bacteria	p__Proteobacteria	c__Alphaproteobacteria	o__Rhizobiales	f__Rhizobiaceae	g__Ochrobactrum_A	s__Ochrobactrum_A grignonense	2	0	0	0	0	0	0	0	2
GB_GCA_002720475.1	d__Bacteria	p__Proteobacteria	c__Alphaproteobacteria	o__Rhodobacterales	f__Rhodobacteraceae	g__Roseovarius	s__Roseovarius sp002720475	2	0	0	0	0	0	0	0	2
RS_GCF_001636945.1	d__Bacteria	p__Actinobacteriota	c__Actinobacteria	o__Streptomycetales	f__Streptomycetaceae	g__Streptomyces	s__Streptomyces sp001636945	2	0	0	0	0	0	0	0	2
RS_GCF_000426865.1	d__Bacteria	p__Desulfuromonadota	c__Desulfuromonadia	o__Geobacterales	f__Geobacteraceae	g__Geobacter_A	s__Geobacter_A bremensis	1	0	1	0	0	0	0	0	2
RS_GCF_900115685.1	d__Bacteria	p__Proteobacteria	c__Gammaproteobacteria	o__Burkholderiales	f__Burkholderiaceae	g__Variovorax	s__Variovorax sp900115685	1	0	0	0	0	0	1	0	2
RS_GCF_002165305.1	d__Bacteria	p__Proteobacteria	c__Gammaproteobacteria	o__Pseudomonadales	f__Moraxellaceae	g__Acinetobacter	s__Acinetobacter sp002165305	2	0	0	0	0	0	0	0	2
RS_GCF_000722635.1	d__Bacteria	p__Proteobacteria	c__Gammaproteobacteria	o__Pseudomonadales	f__Endozoicomonadaceae	g__Endozoicomonas	s__Endozoicomonas numazuensis	2	0	0	0	0	0	0	0	2
RS_GCF_002021565.1	d__Bacteria	p__Firmicutes_I	c__Bacilli_A	o__Paenibacillales	f__Paenibacillaceae	g__Paenibacillus_K	s__Paenibacillus_K selenitireducens	1	0	0	1	0	0	0	0	2
RS_GCF_900156675.1	d__Bacteria	p__Proteobacteria	c__Gammaproteobacteria	o__Pseudomonadales	f__Saccharospirillaceae	g__Oleibacter	s__Oleibacter marinus	2	0	0	0	0	0	0	0	2
RS_GCF_000633255.1	d__Bacteria	p__Proteobacteria	c__Gammaproteobacteria	o__Pseudomonadales	f__Pseudomonadaceae	g__Pseudomonas_E	s__Pseudomonas_E sp000633255	2	0	0	0	0	0	0	0	2
RS_GCF_000315795.1	d__Bacteria	p__Proteobacteria	c__Alphaproteobacteria	o__Rhodospirillales	f__Rhodospirillaceae	g__Caenispirillum	s__Caenispirillum salinarum	2	0	0	0	0	0	0	0	2
RS_GCF_000970345.1	d__Bacteria	p__Proteobacteria	c__Gammaproteobacteria	o__Burkholderiales	f__Burkholderiaceae	g__Robbsia	s__Robbsia andropogonis	2	0	0	0	0	0	0	0	2
RS_GCF_001418495.1	d__Bacteria	p__Actinobacteriota	c__Actinobacteria	o__Streptomycetales	f__Streptomycetaceae	g__Streptomyces	s__Streptomyces pathocidini	1	0	1	0	0	0	0	0	2
GB_GCA_002786505.1	d__Bacteria	p__Nitrospinota	c__Nitrospinia	o__Nitrospinales	f__Nitrospinaceae	g__LS-NOB	s__LS-NOB sp002786505	0	0	0	0	0	0	0	2	2
RS_GCF_000631985.1	d__Bacteria	p__Proteobacteria	c__Gammaproteobacteria	o__Pseudomonadales	f__Pseudomonadaceae	g__Pseudomonas_E	s__Pseudomonas_E sp000631985	2	0	0	0	0	0	0	0	2
RS_GCF_900068845.1	d__Bacteria	p__Proteobacteria	c__Gammaproteobacteria	o__Enterobacterales	f__Enterobacteriaceae	g__Pantoea	s__Pantoea ludwigii_A	2	0	0	0	0	0	0	0	2
RS_GCF_002091755.1	d__Bacteria	p__Proteobacteria	c__Gammaproteobacteria	o__Pseudomonadales	f__Pseudomonadaceae	g__Pseudomonas	s__Pseudomonas nitroreducens	2	0	0	0	0	0	0	0	2
RS_GCF_900188385.1	d__Bacteria	p__Proteobacteria	c__Alphaproteobacteria	o__Azospirillales	f__Azospirillaceae	g__Niveispirillum	s__Niveispirillum sp900188385	2	0	0	0	0	0	0	0	2
RS_GCF_001552435.1	d__Bacteria	p__Actinobacteriota	c__Actinobacteria	o__Actinomycetales	f__Dermatophilaceae	g__Kribbia	s__Kribbia dieselivorans	2	0	0	0	0	0	0	0	2
GB_GCA_003268675.1	d__Bacteria	p__Actinobacteriota	c__Actinobacteria	o__Streptomycetales	f__Streptomycetaceae	g__Streptomyces	s__Streptomyces bacillaris	2	0	0	0	0	0	0	0	2
RS_GCF_000730645.1	d__Bacteria	p__Proteobacteria	c__Gammaproteobacteria	o__Pseudomonadales	f__Pseudomonadaceae	g__Pseudomonas_E	s__Pseudomonas_E parafulva	2	0	0	0	0	0	0	0	2
RS_GCF_900166645.1	d__Bacteria	p__Firmicutes	c__Bacilli	o__Bacillales	f__Bacillaceae	g__Bacillus	s__Bacillus sonorensis_A	1	0	0	1	0	0	0	0	2
RS_GCF_000711305.1	d__Bacteria	p__Proteobacteria	c__Gammaproteobacteria	o__Thiomicrospirales	f__Thiomicrospiraceae	g__Hydrogenovibrio	s__Hydrogenovibrio sp000711305	1	0	0	0	0	0	1	0	2
RS_GCF_002216855.1	d__Bacteria	p__Proteobacteria	c__Gammaproteobacteria	o__Enterobacterales	f__Vibrionaceae	g__Paraphotobacterium	s__Paraphotobacterium marinum	2	0	0	0	0	0	0	0	2
RS_GCF_000819745.1	d__Bacteria	p__Proteobacteria	c__Gammaproteobacteria	o__Enterobacterales	f__Aeromonadaceae	g__Aeromonas	s__Aeromonas bestiarum	2	0	0	0	0	0	0	0	2
RS_GCF_000740015.1	d__Bacteria	p__Proteobacteria	c__Gammaproteobacteria	o__Enterobacterales	f__Vibrionaceae	g__Vibrio	s__Vibrio diazotrophicus	2	0	0	0	0	0	0	0	2
RS_GCF_000368765.1	d__Bacteria	p__Proteobacteria	c__Gammaproteobacteria	o__Pseudomonadales	f__Moraxellaceae	g__Acinetobacter	s__Acinetobacter junii	2	0	0	0	0	0	0	0	2
RS_GCF_000817815.1	d__Bacteria	p__Proteobacteria	c__Gammaproteobacteria	o__Enterobacterales	f__Vibrionaceae	g__Vibrio	s__Vibrio owensii	2	0	0	0	0	0	0	0	2
RS_GCF_002752575.1	d__Bacteria	p__Proteobacteria	c__Gammaproteobacteria	o__Enterobacterales	f__Enterobacteriaceae	g__Erwinia	s__Erwinia sp002752575	2	0	0	0	0	0	0	0	2
RS_GCF_003027925.1	d__Bacteria	p__Actinobacteriota	c__Actinobacteria	o__Mycobacteriales	f__Micromonosporaceae	g__Micromonospora	s__Micromonospora sp003027925	2	0	0	0	0	0	0	0	2
RS_GCF_000012365.1	d__Bacteria	p__Proteobacteria	c__Gammaproteobacteria	o__Burkholderiales	f__Burkholderiaceae	g__Burkholderia	s__Burkholderia thailandensis	2	0	0	0	0	0	0	0	2
RS_GCF_000425185.1	d__Bacteria	p__Proteobacteria	c__Alphaproteobacteria	o__Rhizobiales	f__Pleomorphomonadaceae	g__Pleomorphomonas	s__Pleomorphomonas koreensis	2	0	0	0	0	0	0	0	2
GB_GCA_003530515.1	d__Bacteria	p__Proteobacteria	c__Gammaproteobacteria	o__Pseudomonadales	f__Moraxellaceae	g__Psychrobacter	s__Psychrobacter sp003530515	2	0	0	0	0	0	0	0	2
RS_GCF_001457415.1	d__Bacteria	p__Firmicutes_I	c__Bacilli_A	o__Paenibacillales	f__Paenibacillaceae	g__Gorillibacterium	s__Gorillibacterium timonense	1	0	0	1	0	0	0	0	2
RS_GCF_000368085.1	d__Bacteria	p__Proteobacteria	c__Gammaproteobacteria	o__Pseudomonadales	f__Moraxellaceae	g__Acinetobacter	s__Acinetobacter nosocomialis	2	0	0	0	0	0	0	0	2
RS_GCF_002928115.1	d__Bacteria	p__Proteobacteria	c__Gammaproteobacteria	o__Pseudomonadales	f__Moraxellaceae	g__Acinetobacter	s__Acinetobacter pittii_H	2	0	0	0	0	0	0	0	2
RS_GCF_000167995.1	d__Bacteria	p__Proteobacteria	c__Gammaproteobacteria	o__Enterobacterales	f__Enterobacteriaceae	g__Yersinia	s__Yersinia mollaretii	2	0	0	0	0	0	0	0	2
RS_GCF_001047675.1	d__Bacteria	p__Proteobacteria	c__Gammaproteobacteria	o__Enterobacterales	f__Enterobacteriaceae	g__Yersinia	s__Yersinia aleksiciae	2	0	0	0	0	0	0	0	2
GB_GCA_000208585.2	d__Bacteria	p__Proteobacteria	c__Gammaproteobacteria	o__Enterobacterales	f__Enterobacteriaceae	g__Escherichia	s__Escherichia sp000208585	2	0	0	0	0	0	0	0	2
RS_GCF_000519125.1	d__Bacteria	p__Desulfobacterota_A	c__Desulfovibrionia	o__Desulfovibrionales	f__Desulfovibrionaceae	g__Desulfocurvus	s__Desulfocurvus vexinensis	1	0	0	0	0	0	1	0	2
RS_GCF_001650895.1	d__Bacteria	p__Proteobacteria	c__Alphaproteobacteria	o__Rhodobacterales	f__Rhodobacteraceae	g__EhC02	s__EhC02 sp001650895	2	0	0	0	0	0	0	0	2
RS_GCF_000400995.2	d__Bacteria	p__Proteobacteria	c__Gammaproteobacteria	o__Burkholderiales	f__Burkholderiaceae	g__MR-S7	s__MR-S7 sp000400995	2	0	0	0	0	0	0	0	2
RS_GCF_900215375.1	d__Bacteria	p__Proteobacteria	c__Gammaproteobacteria	o__Enterobacterales	f__Enterobacteriaceae	g__Pluralibacter	s__Pluralibacter sp900215375	2	0	0	0	0	0	0	0	2
GB_GCA_002725285.1	d__Bacteria	p__Proteobacteria	c__Gammaproteobacteria	o__Pseudomonadales	f__HTCC2089	g__GCA-2725285	s__GCA-2725285 sp002725285	0	0	0	0	0	0	0	2	2
RS_GCF_000695255.1	d__Bacteria	p__Proteobacteria	c__Gammaproteobacteria	o__Enterobacterales	f__Vibrionaceae	g__Photobacterium	s__Photobacterium galatheae	2	0	0	0	0	0	0	0	2
RS_GCF_000092925.1	d__Bacteria	p__Proteobacteria	c__Alphaproteobacteria	o__Rhizobiales	f__Xanthobacteraceae	g__Starkeya	s__Starkeya novella	2	0	0	0	0	0	0	0	2
RS_GCF_002933815.1	d__Bacteria	p__Bacteroidota	c__Bacteroidia	o__Sphingobacteriales	f__Sphingobacteriaceae	g__Sphingobacterium	s__Sphingobacterium sp002933815	1	0	0	0	0	0	1	0	2
RS_GCF_000715205.1	d__Bacteria	p__Firmicutes	c__Bacilli	o__Bacillales	f__Bacillaceae	g__Bacillus	s__Bacillus zhangzhouensis	1	0	0	1	0	0	0	0	2
RS_GCF_000162755.2	d__Bacteria	p__Proteobacteria	c__Gammaproteobacteria	o__Legionellales	f__Legionellaceae	g__Legionella	s__Legionella drancourtii	2	0	0	0	0	0	0	0	2
RS_GCF_900116295.1	d__Bacteria	p__Firmicutes	c__Bacilli	o__Bacillales	f__Bacillaceae_G	g__Bacillus_A	s__Bacillus_A sp900116295	1	0	0	1	0	0	0	0	2
GB_GCA_003170825.1	d__Bacteria	p__Acidobacteriota	c__Acidobacteriae	o__Acidobacteriales	f__Acidobacteriaceae	g__Terracidiphilus	s__Terracidiphilus sp003170825	1	0	0	0	0	0	1	0	2
RS_GCF_000263395.1	d__Bacteria	p__Proteobacteria	c__Gammaproteobacteria	o__Pseudomonadales	f__Pseudomonadaceae	g__Pseudomonas_A	s__Pseudomonas_A stutzeri_C	2	0	0	0	0	0	0	0	2
RS_GCF_000496855.1	d__Bacteria	p__Firmicutes	c__Bacilli	o__Bacillales	f__Amphibacillaceae	g__Sediminibacillus	s__Sediminibacillus halophilus_B	0	0	0	2	0	0	0	0	2
RS_GCF_900187385.1	d__Bacteria	p__Actinobacteriota	c__Actinobacteria	o__Streptomycetales	f__Streptomycetaceae	g__Streptomyces	s__Streptomyces sp900187385	1	0	1	0	0	0	0	0	2
RS_GCF_001636295.1	d__Bacteria	p__Actinobacteriota	c__Actinobacteria	o__Actinomycetales	f__Cellulomonadaceae	g__Isoptericola	s__Isoptericola dokdonensis	2	0	0	0	0	0	0	0	2
GB_GCA_003447595.1	d__Bacteria	p__Bacteroidota	c__Bacteroidia	o__Bacteroidales	f__Tannerellaceae	g__UBA12018	s__UBA12018 sp003447595	2	0	0	0	0	0	0	0	2
RS_GCF_900141905.1	d__Bacteria	p__Proteobacteria	c__Alphaproteobacteria	o__Acetobacterales	f__Acetobacteraceae	g__Roseomonas	s__Roseomonas rosea	2	0	0	0	0	0	0	0	2
RS_GCF_900186965.1	d__Bacteria	p__Proteobacteria	c__Gammaproteobacteria	o__Legionellales	f__Legionellaceae	g__Legionella_C	s__Legionella_C spiritensis	2	0	0	0	0	0	0	0	2
RS_GCF_900115695.1	d__Bacteria	p__Proteobacteria	c__Gammaproteobacteria	o__Pseudomonadales	f__Pseudomonadaceae	g__Pseudomonas_E	s__Pseudomonas_E toyotomiensis	2	0	0	0	0	0	0	0	2
RS_GCF_001424345.1	d__Bacteria	p__Proteobacteria	c__Gammaproteobacteria	o__Burkholderiales	f__Burkholderiaceae	g__Caballeronia	s__Caballeronia sp001424345	2	0	0	0	0	0	0	0	2
GB_GCA_003241185.1	d__Bacteria	p__Proteobacteria	c__Gammaproteobacteria	o__Xanthomonadales	f__Xanthomonadaceae	g__Pseudoxanthomonas_A	s__Pseudoxanthomonas_A spadix_A	2	0	0	0	0	0	0	0	2
RS_GCF_000368685.1	d__Bacteria	p__Proteobacteria	c__Gammaproteobacteria	o__Pseudomonadales	f__Moraxellaceae	g__Acinetobacter	s__Acinetobacter baylyi	2	0	0	0	0	0	0	0	2
RS_GCF_002583555.1	d__Bacteria	p__Actinobacteriota	c__Actinobacteria	o__Mycobacteriales	f__Pseudonocardiaceae	g__Pseudonocardia	s__Pseudonocardia sp002583555	2	0	0	0	0	0	0	0	2
GB_GCA_002452115.1	d__Bacteria	p__Proteobacteria	c__Gammaproteobacteria	o__Pseudomonadales	f__Pseudomonadaceae	g__Pseudomonas	s__Pseudomonas nitroreducens_B	2	0	0	0	0	0	0	0	2
GB_GCA_002840755.1	d__Bacteria	p__Chloroflexota	c__Anaerolineae	o__Anaerolineales	f__Anaerolineaceae	g__UBA6170	s__UBA6170 sp002840755	2	0	0	0	0	0	0	0	2
RS_GCF_000719115.1	d__Bacteria	p__Actinobacteriota	c__Actinobacteria	o__Mycobacteriales	f__Pseudonocardiaceae	g__Lentzea	s__Lentzea albidocapillata	2	0	0	0	0	0	0	0	2
RS_GCF_900116595.1	d__Bacteria	p__Proteobacteria	c__Alphaproteobacteria	o__Rhizobiales	f__Rhizobiaceae	g__Pseudaminobacter	s__Pseudaminobacter sp900116595	2	0	0	0	0	0	0	0	2
RS_GCF_001645185.1	d__Bacteria	p__Proteobacteria	c__Gammaproteobacteria	o__Burkholderiales	f__Methylophilaceae	g__MM2	s__MM2 sp001645185	2	0	0	0	0	0	0	0	2
RS_GCF_000701705.1	d__Bacteria	p__Desulfobacterota_A	c__Desulfovibrionia	o__Desulfovibrionales	f__Desulfovibrionaceae	g__Bilophila	s__Bilophila wadsworthia	1	0	0	0	0	0	1	0	2
RS_GCF_000313755.1	d__Bacteria	p__Proteobacteria	c__Gammaproteobacteria	o__Pseudomonadales	f__Pseudomonadaceae	g__Pseudomonas	s__Pseudomonas nitroreducens_A	2	0	0	0	0	0	0	0	2
RS_GCF_002179965.1	d__Bacteria	p__Proteobacteria	c__Gammaproteobacteria	o__Burkholderiales	f__Burkholderiaceae	g__Pandoraea	s__Pandoraea sp002179965	2	0	0	0	0	0	0	0	2
RS_GCF_000429625.1	d__Bacteria	p__Proteobacteria	c__Alphaproteobacteria	o__Azospirillales	f__Azospirillaceae	g__Azospirillum	s__Azospirillum halopraeferens	2	0	0	0	0	0	0	0	2
RS_GCF_001592845.1	d__Bacteria	p__Firmicutes	c__Bacilli	o__Bacillales	f__Halobacillaceae	g__Halobacillus	s__Halobacillus sp001592845	0	0	0	2	0	0	0	0	2
RS_GCF_000691145.1	d__Bacteria	p__Firmicutes	c__Bacilli	o__Bacillales	f__Bacillaceae	g__Bacillus	s__Bacillus altitudinis	1	0	0	1	0	0	0	0	2
RS_GCF_001423295.1	d__Bacteria	p__Proteobacteria	c__Alphaproteobacteria	o__Rhizobiales	f__Beijerinckiaceae	g__Methylobacterium	s__Methylobacterium sp001423295	2	0	0	0	0	0	0	0	2
RS_GCF_900101745.1	d__Bacteria	p__Actinobacteriota	c__Actinobacteria	o__Mycobacteriales	f__Micromonosporaceae	g__Glycomyces	s__Glycomyces harbinensis	1	0	1	0	0	0	0	0	2
RS_GCF_001293685.1	d__Bacteria	p__Desulfobacterota	c__Desulfobacteria	o__Desulfobacterales	f__Desulfosarcinaceae	g__Desulfatitalea	s__Desulfatitalea tepidiphila	2	0	0	0	0	0	0	0	2
RS_GCF_900113145.1	d__Bacteria	p__Actinobacteriota	c__Actinobacteria	o__Propionibacteriales	f__Actinopolymorphaceae	g__Actinopolymorpha	s__Actinopolymorpha cephalotaxi	1	0	1	0	0	0	0	0	2
GB_GCA_002733205.1	d__Bacteria	p__Proteobacteria	c__Gammaproteobacteria	o__Pseudomonadales	f__Saccharospirillaceae	g__UBA2009	s__UBA2009 sp002733205	2	0	0	0	0	0	0	0	2
RS_GCF_003046555.1	d__Bacteria	p__Actinobacteriota	c__Actinobacteria	o__Streptomycetales	f__Streptomycetaceae	g__Streptomyces	s__Streptomyces sp003046555	1	0	1	0	0	0	0	0	2
GB_GCA_003165115.1	d__Bacteria	p__Desulfobacterota	c__Syntrophorhabdia	o__Syntrophorhabdales	f__WCHB1-27	g__BOG-1155	s__BOG-1155 sp003165115	2	0	0	0	0	0	0	0	2
RS_GCF_001431415.1	d__Bacteria	p__Proteobacteria	c__Gammaproteobacteria	o__Xanthomonadales	f__Xanthomonadaceae	g__Stenotrophomonas	s__Stenotrophomonas humi	2	0	0	0	0	0	0	0	2
RS_GCF_900105555.1	d__Bacteria	p__Proteobacteria	c__Gammaproteobacteria	o__Pseudomonadales	f__Pseudomonadaceae	g__Pseudomonas_E	s__Pseudomonas_E coleopterorum	2	0	0	0	0	0	0	0	2
RS_GCF_001463885.1	d__Bacteria	p__Proteobacteria	c__Alphaproteobacteria	o__Rhizobiales	f__Rhizobiaceae	g__Aureimonas	s__Aureimonas altamirensis	2	0	0	0	0	0	0	0	2
RS_GCF_002197815.1	d__Bacteria	p__Proteobacteria	c__Gammaproteobacteria	o__Pseudomonadales	f__Pseudomonadaceae	g__Pseudomonas_E	s__Pseudomonas_E oleovorans	2	0	0	0	0	0	0	0	2
RS_GCF_001940455.1	d__Bacteria	p__Actinobacteriota	c__Actinobacteria	o__Mycobacteriales	f__Pseudonocardiaceae	g__Actinokineospora	s__Actinokineospora bangkokensis	2	0	0	0	0	0	0	0	2
RS_GCF_900156915.1	d__Bacteria	p__Firmicutes	c__Bacilli	o__Bacillales	f__Amphibacillaceae	g__Sediminibacillus_A	s__Sediminibacillus_A massiliensis	0	0	0	2	0	0	0	0	2
RS_GCF_000234355.1	d__Bacteria	p__Proteobacteria	c__Alphaproteobacteria	o__Acetobacterales	f__Acetobacteraceae	g__Gluconobacter	s__Gluconobacter morbifer	2	0	0	0	0	0	0	0	2
RS_GCF_000172415.1	d__Bacteria	p__Proteobacteria	c__Gammaproteobacteria	o__Burkholderiales	f__Burkholderiaceae	g__Paraburkholderia	s__Paraburkholderia graminis	2	0	0	0	0	0	0	0	2
RS_GCF_001467625.1	d__Bacteria	p__Proteobacteria	c__Gammaproteobacteria	o__Legionellales	f__Legionellaceae	g__Tatlockia	s__Tatlockia feeleii	2	0	0	0	0	0	0	0	2
RS_GCF_003054245.1	d__Bacteria	p__Firmicutes_I	c__Bacilli_A	o__Thermoactinomycetales	f__Thermoactinomycetaceae	g__Melghirimyces	s__Melghirimyces profundicolus	0	0	0	2	0	0	0	0	2
RS_GCF_000717335.1	d__Bacteria	p__Actinobacteriota	c__Actinobacteria	o__Mycobacteriales	f__Pseudonocardiaceae	g__Amycolatopsis	s__Amycolatopsis jejuensis	2	0	0	0	0	0	0	0	2
GB_GCA_002352605.1	d__Bacteria	p__Desulfobacterota	c__Desulfobacteria	o__Desulfobacterales	f__Desulfosarcinaceae	g__Desulfosarcina	s__Desulfosarcina sp002352605	2	0	0	0	0	0	0	0	2
GB_GCA_003220855.1	d__Bacteria	p__Gemmatimonadota	c__Gemmatimonadetes	o__Gemmatimonadales	f__GWC2-71-9	g__AG41	s__AG41 sp003220855	0	0	1	0	0	0	0	1	2
RS_GCF_002855515.1	d__Bacteria	p__Proteobacteria	c__Alphaproteobacteria	o__Rhizobiales	f__Rhizobiaceae	g__Allorhizobium	s__Allorhizobium sp002855515	2	0	0	0	0	0	0	0	2
RS_GCF_001017755.1	d__Bacteria	p__Actinobacteriota	c__Actinobacteria	o__Frankiales	f__Frankiaceae	g__Frankia_A	s__Frankia_A coriariae	1	0	1	0	0	0	0	0	2
RS_GCF_000754805.1	d__Bacteria	p__Proteobacteria	c__Gammaproteobacteria	o__Enterobacterales	f__Enterobacteriaceae	g__Yersinia	s__Yersinia frederiksenii	2	0	0	0	0	0	0	0	2
RS_GCF_000315425.1	d__Bacteria	p__Proteobacteria	c__Gammaproteobacteria	o__Burkholderiales	f__Burkholderiaceae	g__Massilia	s__Massilia timonae	2	0	0	0	0	0	0	0	2
RS_GCF_900107305.1	d__Bacteria	p__Firmicutes_I	c__Bacilli_A	o__Thermoactinomycetales	f__Thermoactinomycetaceae	g__DSM-45891	s__DSM-45891 sp900107305	0	0	0	2	0	0	0	0	2
RS_GCF_000718555.1	d__Bacteria	p__Actinobacteriota	c__Actinobacteria	o__Mycobacteriales	f__Micromonosporaceae	g__Micromonospora	s__Micromonospora chokoriensis_B	2	0	0	0	0	0	0	0	2
RS_GCF_002108845.1	d__Bacteria	p__Proteobacteria	c__Alphaproteobacteria	o__Rhizobiales	f__Xanthobacteraceae	g__Bradyrhizobium	s__Bradyrhizobium canariense_B	2	0	0	0	0	0	0	0	2
RS_GCF_002217285.1	d__Bacteria	p__Bacteroidota	c__Bacteroidia	o__Flavobacteriales	f__Flavobacteriaceae	g__Flavobacterium	s__Flavobacterium hercynium	1	0	0	0	0	0	1	0	2
RS_GCF_900128485.1	d__Bacteria	p__Proteobacteria	c__Gammaproteobacteria	o__Burkholderiales	f__Burkholderiaceae	g__Duodenibacillus	s__Duodenibacillus massiliensis	1	0	0	0	0	0	1	0	2
RS_GCF_002812485.1	d__Bacteria	p__Proteobacteria	c__Gammaproteobacteria	o__Enterobacterales	f__Enterobacteriaceae	g__Dickeya	s__Dickeya fangzhongdai	2	0	0	0	0	0	0	0	2
RS_GCF_000024365.1	d__Bacteria	p__Actinobacteriota	c__Actinobacteria	o__Mycobacteriales	f__Nakamurellaceae	g__Nakamurella	s__Nakamurella multipartita	2	0	0	0	0	0	0	0	2
RS_GCF_900102745.1	d__Bacteria	p__Actinobacteriota	c__Actinobacteria	o__Mycobacteriales	f__Geodermatophilaceae	g__Geodermatophilus	s__Geodermatophilus telluris	2	0	0	0	0	0	0	0	2
RS_GCF_000485795.1	d__Bacteria	p__Proteobacteria	c__Gammaproteobacteria	o__Enterobacterales	f__Shewanellaceae	g__Shewanella	s__Shewanella decolorationis	2	0	0	0	0	0	0	0	2
RS_GCF_003122365.1	d__Bacteria	p__Actinobacteriota	c__Actinobacteria	o__Streptomycetales	f__Streptomycetaceae	g__Streptomyces	s__Streptomyces spongiicola	1	0	1	0	0	0	0	0	2
RS_GCF_900115495.1	d__Bacteria	p__Proteobacteria	c__Gammaproteobacteria	o__Enterobacterales	f__Vibrionaceae	g__Enterovibrio	s__Enterovibrio norvegicus	2	0	0	0	0	0	0	0	2
RS_GCF_000300995.1	d__Bacteria	p__Proteobacteria	c__Gammaproteobacteria	o__Pseudomonadales	f__Alcanivoracaceae	g__Alcanivorax	s__Alcanivorax hongdengensis	2	0	0	0	0	0	0	0	2
RS_GCF_000966285.1	d__Bacteria	p__Actinobacteriota	c__Actinobacteria	o__Frankiales	f__Frankiaceae	g__Frankia	s__Frankia sp000966285	1	0	1	0	0	0	0	0	2
RS_GCF_002127655.1	d__Bacteria	p__Proteobacteria	c__Gammaproteobacteria	o__Burkholderiales	f__Burkholderiaceae	g__Janthinobacterium	s__Janthinobacterium sp002127655	2	0	0	0	0	0	0	0	2
RS_GCF_000982955.1	d__Bacteria	p__Actinobacteriota	c__Actinobacteria	o__Mycobacteriales	f__Micromonosporaceae	g__Micromonospora	s__Micromonospora sp000982955	2	0	0	0	0	0	0	0	2
RS_GCF_000297775.1	d__Bacteria	p__Proteobacteria	c__Gammaproteobacteria	o__Burkholderiales	f__Burkholderiaceae	g__Sutterella	s__Sutterella wadsworthensis_A	1	0	0	0	0	0	1	0	2
RS_GCF_001939725.1	d__Bacteria	p__Proteobacteria	c__Gammaproteobacteria	o__Enterobacterales	f__Vibrionaceae	g__Vibrio	s__Vibrio panuliri	2	0	0	0	0	0	0	0	2
RS_GCF_002269505.1	d__Bacteria	p__Proteobacteria	c__Gammaproteobacteria	o__Pseudomonadales	f__Pseudomonadaceae	g__Pseudomonas_E	s__Pseudomonas_E fragi_D	2	0	0	0	0	0	0	0	2
GB_GCA_003075415.1	d__Bacteria	p__Proteobacteria	c__Alphaproteobacteria	o__Rhizobiales	f__Beijerinckiaceae	g__Microvirga	s__Microvirga sp003075415	2	0	0	0	0	0	0	0	2
GB_GCA_001919995.1	d__Bacteria	p__Chloroflexota	c__Ktedonobacteria	o__Ktedonobacterales	f__Ktedonobacteraceae	g__UBA11361	s__UBA11361 sp001919995	0	0	2	0	0	0	0	0	2
RS_GCF_900104185.1	d__Bacteria	p__Firmicutes	c__Bacilli	o__Bacillales	f__Halobacillaceae	g__Halobacillus	s__Halobacillus aidingensis	0	0	0	2	0	0	0	0	2
GB_GCA_000245335.1	d__Bacteria	p__Firmicutes	c__Bacilli	o__Bacillales	f__Bacillaceae	g__Bacillus	s__Bacillus mojavensis	1	0	0	1	0	0	0	0	2
RS_GCF_001420605.1	d__Bacteria	p__Firmicutes	c__Bacilli	o__Bacillales	f__Bacillaceae_G	g__Bacillus_AW	s__Bacillus_AW sp001420605	1	0	0	1	0	0	0	0	2
RS_GCF_000620645.1	d__Bacteria	p__Actinobacteriota	c__Actinobacteria	o__Propionibacteriales	f__Nocardioidaceae	g__Nocardioides	s__Nocardioides sp000620645	1	0	1	0	0	0	0	0	2
RS_GCF_002095395.1	d__Bacteria	p__Actinobacteriota	c__Actinobacteria	o__Mycobacteriales	f__Mycobacteriaceae	g__Williamsia	s__Williamsia sp002095395	1	0	1	0	0	0	0	0	2
RS_GCF_000026105.1	d__Bacteria	p__Proteobacteria	c__Gammaproteobacteria	o__Pseudomonadales	f__Pseudomonadaceae	g__Pseudomonas_E	s__Pseudomonas_E entomophila	2	0	0	0	0	0	0	0	2
RS_GCF_000816495.1	d__Bacteria	p__Proteobacteria	c__Gammaproteobacteria	o__Pseudomonadales	f__Moraxellaceae	g__Acinetobacter	s__Acinetobacter harbinensis	2	0	0	0	0	0	0	0	2
RS_GCF_003023805.1	d__Bacteria	p__Proteobacteria	c__Gammaproteobacteria	o__Enterobacterales	f__Enterobacteriaceae	g__Kluyvera	s__Kluyvera ascorbata_B	2	0	0	0	0	0	0	0	2
RS_GCF_003201655.1	d__Bacteria	p__Actinobacteriota	c__Actinobacteria	o__Mycobacteriales	f__Mycobacteriaceae	g__Mycolicibacterium	s__Mycolicibacterium moriokaense_A	1	0	1	0	0	0	0	0	2
RS_GCF_001266615.1	d__Bacteria	p__Proteobacteria	c__Gammaproteobacteria	o__Enterobacterales	f__Enterobacteriaceae	g__Kluyvera	s__Kluyvera cryocrescens_A	2	0	0	0	0	0	0	0	2
RS_GCF_003121925.1	d__Bacteria	p__Proteobacteria	c__Gammaproteobacteria	o__Cardiobacteriales	f__Wohlfahrtiimonadaceae	g__Ignatzschineria	s__Ignatzschineria indica	2	0	0	0	0	0	0	0	2
RS_GCF_001753165.1	d__Bacteria	p__Proteobacteria	c__Gammaproteobacteria	o__Ectothiorhodospirales	f__Acidihalobacteraceae	g__Acidihalobacter	s__Acidihalobacter prosperus_B	2	0	0	0	0	0	0	0	2
RS_GCF_000832125.1	d__Bacteria	p__Bacteroidota	c__Bacteroidia	o__Flavobacteriales	f__Flavobacteriaceae	g__Flavobacterium	s__Flavobacterium hibernum	2	0	0	0	0	0	0	0	2
RS_GCF_001998325.1	d__Bacteria	p__Actinobacteriota	c__Actinobacteria	o__Streptosporangiales	f__Streptosporangiaceae	g__Nocardiopsis	s__Nocardiopsis sinuspersici	2	0	0	0	0	0	0	0	2
RS_GCF_002873455.1	d__Bacteria	p__Proteobacteria	c__Gammaproteobacteria	o__Enterobacterales	f__Vibrionaceae	g__Vibrio	s__Vibrio splendidus_J	2	0	0	0	0	0	0	0	2
RS_GCF_000469325.1	d__Bacteria	p__Firmicutes	c__Bacilli	o__Lactobacillales	f__Lactobacillaceae	g__Lactobacillus_J	s__Lactobacillus_J shenzhenensis	2	0	0	0	0	0	0	0	2
GB_GCA_003264365.1	d__Bacteria	p__Actinobacteriota	c__Actinobacteria	o__Mycobacteriales	f__Micromonosporaceae	g__Micromonospora	s__Micromonospora noduli	2	0	0	0	0	0	0	0	2
RS_GCF_002860205.1	d__Bacteria	p__Firmicutes	c__Bacilli	o__Bacillales	f__Bacillaceae_A	g__T33-2	s__T33-2 sp002860205	0	0	0	2	0	0	0	0	2
RS_GCF_001468035.1	d__Bacteria	p__Proteobacteria	c__Gammaproteobacteria	o__Legionellales	f__Legionellaceae	g__Legionella	s__Legionella tucsonensis	2	0	0	0	0	0	0	0	2
RS_GCF_003182485.1	d__Bacteria	p__Actinobacteriota	c__Actinobacteria	o__Mycobacteriales	f__Geodermatophilaceae	g__Geodermatophilus	s__Geodermatophilus normandii	2	0	0	0	0	0	0	0	2
RS_GCF_002119225.1	d__Bacteria	p__Actinobacteriota	c__Actinobacteria	o__Streptomycetales	f__Streptomycetaceae	g__Streptomyces	s__Streptomyces fradiae	2	0	0	0	0	0	0	0	2
GB_GCA_002255515.1	d__Bacteria	p__Proteobacteria	c__Alphaproteobacteria	o__Acetobacterales	f__Acetobacteraceae	g__Acidiphilium	s__Acidiphilium sp002255515	2	0	0	0	0	0	0	0	2
RS_GCF_000428885.1	d__Bacteria	p__Acidobacteriota	c__Holophagae	o__Holophagales	f__Holophagaceae	g__Geothrix	s__Geothrix fermentans	2	0	0	0	0	0	0	0	2
RS_GCF_002217795.1	d__Bacteria	p__Proteobacteria	c__Gammaproteobacteria	o__Burkholderiales	f__Chromobacteriaceae	g__Aquitalea	s__Aquitalea magnusonii_B	2	0	0	0	0	0	0	0	2
RS_GCF_900156545.1	d__Bacteria	p__Proteobacteria	c__Gammaproteobacteria	o__Pseudomonadales	f__Pseudomonadaceae	g__Pseudomonas_E	s__Pseudomonas_E alcaligenes_A	2	0	0	0	0	0	0	0	2
GB_GCA_001873115.1	d__Bacteria	p__Desulfobacterota	c__Desulfobulbia	o__Desulfobulbales	f__Desulfurivibrionaceae	g__CG2-30-60-27	s__CG2-30-60-27 sp001873115	1	0	0	0	0	0	1	0	2
RS_GCF_000787695.1	d__Bacteria	p__Proteobacteria	c__Alphaproteobacteria	o__Rhodobacterales	f__Rhodobacteraceae	g__Paracoccus	s__Paracoccus sp000787695	2	0	0	0	0	0	0	0	2
GB_GCA_003268885.1	d__Bacteria	p__Proteobacteria	c__Gammaproteobacteria	o__Pseudomonadales	f__Halomonadaceae	g__Halomonas_E	s__Halomonas_E taeanensis_A	2	0	0	0	0	0	0	0	2
RS_GCF_003260095.1	d__Bacteria	p__Proteobacteria	c__Gammaproteobacteria	o__Enterobacterales	f__Pasteurellaceae	g__Glaesserella	s__Glaesserella sp003260095	2	0	0	0	0	0	0	0	2
RS_GCF_000196155.1	d__Bacteria	p__Proteobacteria	c__Gammaproteobacteria	o__Enterobacterales	f__Enterobacteriaceae	g__Photorhabdus	s__Photorhabdus laumondii	2	0	0	0	0	0	0	0	2
RS_GCF_002112885.1	d__Bacteria	p__Proteobacteria	c__Gammaproteobacteria	o__Pseudomonadales	f__Pseudomonadaceae	g__Pseudomonas_E	s__Pseudomonas_E sp002112885	2	0	0	0	0	0	0	0	2
RS_GCF_002386385.1	d__Bacteria	p__Proteobacteria	c__Gammaproteobacteria	o__Enterobacterales	f__Enterobacteriaceae	g__Citrobacter	s__Citrobacter werkmanii_A	2	0	0	0	0	0	0	0	2
GB_GCA_003285205.1	d__Bacteria	p__Proteobacteria	c__Gammaproteobacteria	o__Pseudomonadales	f__Marinomonadaceae	g__Marinomonas	s__Marinomonas primoryensis	2	0	0	0	0	0	0	0	2
RS_GCF_900197875.1	d__Bacteria	p__Actinobacteriota	c__Actinobacteria	o__Frankiales	f__Frankiaceae	g__Frankia	s__Frankia sp900197875	0	0	2	0	0	0	0	0	2
RS_GCF_000688655.1	d__Bacteria	p__Proteobacteria	c__Gammaproteobacteria	o__Enterobacterales	f__Enterobacteriaceae	g__Lonsdalea	s__Lonsdalea quercina	2	0	0	0	0	0	0	0	2
RS_GCF_000597945.1	d__Bacteria	p__Proteobacteria	c__Gammaproteobacteria	o__Enterobacterales	f__Enterobacteriaceae	g__Yersinia	s__Yersinia enterocolitica_G	2	0	0	0	0	0	0	0	2
GB_GCA_000498115.1	d__Bacteria	p__Proteobacteria	c__Gammaproteobacteria	o__Burkholderiales	f__Burkholderiaceae	g__Burkholderia	s__Burkholderia cenocepacia_B	2	0	0	0	0	0	0	0	2
GB_GCA_003241485.1	d__Bacteria	p__Proteobacteria	c__Alphaproteobacteria	o__Rhizobiales	f__Xanthobacteraceae	g__Starkeya_A	s__Starkeya_A novella	2	0	0	0	0	0	0	0	2
RS_GCF_002101595.1	d__Bacteria	p__Actinobacteriota	c__Actinobacteria	o__Mycobacteriales	f__Mycobacteriaceae	g__Mycobacterium	s__Mycobacterium celatum	2	0	0	0	0	0	0	0	2
RS_GCF_001877785.1	d__Bacteria	p__Firmicutes	c__Bacilli	o__Bacillales	f__Bacillaceae_B	g__Bacillus_F	s__Bacillus_F aquimaris_A	0	0	0	2	0	0	0	0	2
GB_GCA_002319885.1	d__Bacteria	p__Bacteroidota	c__Bacteroidia	o__Bacteroidales	f__vadinHA17	g__LD21	s__LD21 sp002319885	2	0	0	0	0	0	0	0	2
RS_GCF_001468125.1	d__Bacteria	p__Proteobacteria	c__Gammaproteobacteria	o__Legionellales	f__Legionellaceae	g__Legionella_C	s__Legionella_C rubrilucens	2	0	0	0	0	0	0	0	2
RS_GCF_003231275.1	d__Bacteria	p__Proteobacteria	c__Gammaproteobacteria	o__Pseudomonadales	f__Pseudomonadaceae	g__Pseudomonas_E	s__Pseudomonas_E sp003231275	2	0	0	0	0	0	0	0	2
RS_GCF_000826685.1	d__Bacteria	p__Actinobacteriota	c__Actinobacteria	o__Streptosporangiales	f__Streptosporangiaceae	g__Streptomonospora	s__Streptomonospora alba	2	0	0	0	0	0	0	0	2
GB_GCA_001899045.1	d__Bacteria	p__Proteobacteria	c__Alphaproteobacteria	o__Rhizobiales	f__Devosiaceae	g__Devosia	s__Devosia sp001899045	2	0	0	0	0	0	0	0	2
RS_GCF_001269545.1	d__Bacteria	p__Proteobacteria	c__Gammaproteobacteria	o__Pseudomonadales	f__Pseudomonadaceae	g__Pseudomonas_E	s__Pseudomonas_E sp001269545	2	0	0	0	0	0	0	0	2
RS_GCF_002205635.1	d__Bacteria	p__Proteobacteria	c__Alphaproteobacteria	o__Sphingomonadales	f__Sphingomonadaceae	g__Sphingopyxis	s__Sphingopyxis witflariensis	2	0	0	0	0	0	0	0	2
RS_GCF_002797395.1	d__Bacteria	p__Firmicutes	c__Bacilli	o__Bacillales	f__Bacillaceae_D	g__45385	s__45385 sp002797395	0	0	0	2	0	0	0	0	2
RS_GCF_000711795.1	d__Bacteria	p__Proteobacteria	c__Gammaproteobacteria	o__Enterobacterales	f__Vibrionaceae	g__Vibrio	s__Vibrio pacinii	2	0	0	0	0	0	0	0	2
GB_GCA_000372225.1	d__Bacteria	p__Nitrospinota	c__Nitrospinia	o__Nitrospinales	f__Nitrospinaceae	g__SCGCAAA288-L16	s__SCGCAAA288-L16 sp000372225	0	0	0	0	0	0	0	2	2
GB_GCA_002168225.1	d__Bacteria	p__Proteobacteria	c__Alphaproteobacteria	o__Micavibrionales	f__TMED2	g__TMED2	s__TMED2 sp002168225	2	0	0	0	0	0	0	0	2
GB_GCA_002842215.1	d__Bacteria	p__Proteobacteria	c__Gammaproteobacteria	o__Burkholderiales	f__Burkholderiaceae	g__Hydrogenophaga	s__Hydrogenophaga sp002842215	2	0	0	0	0	0	0	0	2
GB_GCA_900472295.1	d__Bacteria	p__Proteobacteria	c__Alphaproteobacteria	o__Rhizobiales	f__Rhizobiaceae	g__Mesorhizobium	s__Mesorhizobium sp900472295	2	0	0	0	0	0	0	0	2
RS_GCF_900129155.1	d__Bacteria	p__Proteobacteria	c__Gammaproteobacteria	o__Pseudomonadales	f__Marinomonadaceae	g__Marinomonas	s__Marinomonas polaris	2	0	0	0	0	0	0	0	2
RS_GCF_001542625.1	d__Bacteria	p__Actinobacteriota	c__Actinobacteria	o__Streptomycetales	f__Streptomycetaceae	g__Streptomyces	s__Streptomyces griseochromogenes	1	0	1	0	0	0	0	0	2
RS_GCF_900110925.1	d__Bacteria	p__Proteobacteria	c__Gammaproteobacteria	o__Pseudomonadales	f__Pseudomonadaceae	g__Pseudomonas_E	s__Pseudomonas_E cuatrocienegasensis	2	0	0	0	0	0	0	0	2
RS_GCF_001426375.1	d__Bacteria	p__Firmicutes_I	c__Bacilli_A	o__Paenibacillales	f__Paenibacillaceae	g__Paenibacillus_E	s__Paenibacillus_E sp001426375	0	0	0	2	0	0	0	0	2
RS_GCF_000410875.1	d__Bacteria	p__Proteobacteria	c__Gammaproteobacteria	o__Pseudomonadales	f__Pseudomonadaceae	g__Pseudomonas_D	s__Pseudomonas_D pelagia	2	0	0	0	0	0	0	0	2
RS_GCF_003044185.1	d__Bacteria	p__Actinobacteriota	c__Thermoleophilia	o__Solirubrobacterales	f__Solirubrobacteraceae	g__SEOHO-28	s__SEOHO-28 sp003044185	2	0	0	0	0	0	0	0	2
RS_GCF_002976475.1	d__Bacteria	p__Proteobacteria	c__Gammaproteobacteria	o__Enterobacterales	f__Enterobacteriaceae	g__Erwinia	s__Erwinia coffeiphila	2	0	0	0	0	0	0	0	2
GB_GCA_900470735.1	d__Bacteria	p__Proteobacteria	c__Alphaproteobacteria	o__Rhizobiales	f__Rhizobiaceae	g__Pseudochrobactrum	s__Pseudochrobactrum sp900470735	2	0	0	0	0	0	0	0	2
RS_GCF_001513785.1	d__Bacteria	p__Proteobacteria	c__Gammaproteobacteria	o__Enterobacterales	f__Alteromonadaceae	g__Rheinheimera	s__Rheinheimera sp001513785	2	0	0	0	0	0	0	0	2
RS_GCF_001310775.1	d__Bacteria	p__Proteobacteria	c__Gammaproteobacteria	o__Xanthomonadales	f__Xanthomonadaceae	g__Stenotrophomonas	s__Stenotrophomonas pictorum	2	0	0	0	0	0	0	0	2
RS_GCF_001922585.1	d__Bacteria	p__Proteobacteria	c__Gammaproteobacteria	o__Enterobacterales	f__Enterobacteriaceae	g__1-19	s__1-19 sp001922585	2	0	0	0	0	0	0	0	2
RS_GCF_001669775.1	d__Bacteria	p__Proteobacteria	c__Gammaproteobacteria	o__Enterobacterales	f__Alteromonadaceae	g__Pararheinheimera	s__Pararheinheimera sp001669775	2	0	0	0	0	0	0	0	2
RS_GCF_002264395.1	d__Bacteria	p__Firmicutes_I	c__Bacilli_A	o__Paenibacillales	f__Paenibacillaceae	g__Paenibacillus	s__Paenibacillus sp002264395	1	0	0	1	0	0	0	0	2
RS_GCF_002257525.1	d__Bacteria	p__Proteobacteria	c__Gammaproteobacteria	o__Pseudomonadales	f__Halomonadaceae	g__Halomonas	s__Halomonas ventosae_B	2	0	0	0	0	0	0	0	2
RS_GCF_000419525.1	d__Bacteria	p__Proteobacteria	c__Gammaproteobacteria	o__Thiotrichales	f__Thiotrichaceae	g__Leucothrix	s__Leucothrix mucor	2	0	0	0	0	0	0	0	2
RS_GCF_001984575.1	d__Bacteria	p__Actinobacteriota	c__Actinobacteria	o__Streptomycetales	f__Streptomycetaceae	g__Streptomyces	s__Streptomyces sp001984575	2	0	0	0	0	0	0	0	2
RS_GCF_000009765.2	d__Bacteria	p__Actinobacteriota	c__Actinobacteria	o__Streptomycetales	f__Streptomycetaceae	g__Streptomyces	s__Streptomyces avermitilis	1	0	1	0	0	0	0	0	2
RS_GCF_900105225.1	d__Bacteria	p__Firmicutes_I	c__Bacilli_A	o__Paenibacillales	f__Paenibacillaceae	g__Paenibacillus_O	s__Paenibacillus_O sp900105225	0	0	0	2	0	0	0	0	2
RS_GCF_001440415.1	d__Bacteria	p__Proteobacteria	c__Alphaproteobacteria	o__Rhizobiales	f__Xanthobacteraceae	g__Bradyrhizobium	s__Bradyrhizobium retamae	2	0	0	0	0	0	0	0	2
RS_GCF_900110585.1	d__Bacteria	p__Proteobacteria	c__Gammaproteobacteria	o__Nitrococcales	f__Aquisalimonadaceae	g__Aquisalimonas	s__Aquisalimonas asiatica	2	0	0	0	0	0	0	0	2
RS_GCF_000626635.1	d__Bacteria	p__Bacteroidota	c__Bacteroidia	o__Bacteroidales	f__Prolixibacteraceae	g__Draconibacterium	s__Draconibacterium orientale	0	0	1	0	0	0	1	0	2
RS_GCF_900217235.1	d__Bacteria	p__Desulfobacterota_A	c__Desulfovibrionia	o__Desulfovibrionales	f__Desulfovibrionaceae	g__Pseudodesulfovibrio	s__Pseudodesulfovibrio profundus	1	0	0	0	0	0	1	0	2
RS_GCF_000299915.1	d__Bacteria	p__Proteobacteria	c__Gammaproteobacteria	o__Enterobacterales	f__Gallaecimonadaceae	g__Gallaecimonas	s__Gallaecimonas xiamenensis	2	0	0	0	0	0	0	0	2
RS_GCF_000803315.1	d__Bacteria	p__Proteobacteria	c__Gammaproteobacteria	o__Enterobacterales	f__Enterobacteriaceae	g__Pectobacterium	s__Pectobacterium actinidiae	2	0	0	0	0	0	0	0	2
GB_GCA_002469885.1	d__Bacteria	p__Proteobacteria	c__Gammaproteobacteria	o__UBA7366	f__UBA7366	g__UBA7366	s__UBA7366 sp002469885	2	0	0	0	0	0	0	0	2
RS_GCF_002940005.1	d__Bacteria	p__Proteobacteria	c__Gammaproteobacteria	o__Xanthomonadales	f__Xanthomonadaceae	g__Xanthomonas	s__Xanthomonas hortorum	2	0	0	0	0	0	0	0	2
RS_GCF_000282315.2	d__Bacteria	p__Proteobacteria	c__Gammaproteobacteria	o__Pseudomonadales	f__Pseudomonadaceae	g__Pseudomonas_E	s__Pseudomonas_E sp000282315	2	0	0	0	0	0	0	0	2
RS_GCF_900079995.1	d__Bacteria	p__Proteobacteria	c__Gammaproteobacteria	o__Enterobacterales	f__Enterobacteriaceae	g__Citrobacter	s__Citrobacter europaeus	2	0	0	0	0	0	0	0	2
RS_GCF_001468105.1	d__Bacteria	p__Proteobacteria	c__Gammaproteobacteria	o__Legionellales	f__Legionellaceae	g__Legionella	s__Legionella sainthelensi	2	0	0	0	0	0	0	0	2
RS_GCF_000014245.1	d__Bacteria	p__Proteobacteria	c__Alphaproteobacteria	o__Rhizobiales	f__Rhizobiaceae	g__Chelativorans	s__Chelativorans sp000014245	2	0	0	0	0	0	0	0	2
RS_GCF_001544975.2	d__Bacteria	p__Proteobacteria	c__Gammaproteobacteria	o__Burkholderiales	f__Burkholderiaceae	g__Caballeronia	s__Caballeronia arationis	2	0	0	0	0	0	0	0	2
RS_GCF_002879865.1	d__Bacteria	p__Proteobacteria	c__Gammaproteobacteria	o__Burkholderiales	f__Burkholderiaceae	g__Paraburkholderia	s__Paraburkholderia rhynchosiae	2	0	0	0	0	0	0	0	2
RS_GCF_001701025.1	d__Bacteria	p__Actinobacteriota	c__Actinobacteria	o__Mycobacteriales	f__Pseudonocardiaceae	g__Lentzea	s__Lentzea guizhouensis	2	0	0	0	0	0	0	0	2
RS_GCF_900115905.1	d__Bacteria	p__Proteobacteria	c__Gammaproteobacteria	o__Pseudomonadales	f__Pseudomonadaceae	g__Pseudomonas_D	s__Pseudomonas_D formosensis	2	0	0	0	0	0	0	0	2
RS_GCF_900090105.1	d__Bacteria	p__Actinobacteriota	c__Actinobacteria	o__Mycobacteriales	f__Micromonosporaceae	g__Micromonospora	s__Micromonospora humi	2	0	0	0	0	0	0	0	2
GB_GCA_002292975.1	d__Bacteria	p__Proteobacteria	c__Gammaproteobacteria	o__Burkholderiales	f__Burkholderiaceae	g__Polynucleobacter	s__Polynucleobacter sp002292975	2	0	0	0	0	0	0	0	2
RS_GCF_000284235.1	d__Bacteria	p__Campylobacterota	c__Campylobacteria	o__Campylobacterales	f__Arcobacteraceae	g__Aliarcobacter	s__Aliarcobacter sp000284235	1	0	0	0	0	0	1	0	2
RS_GCF_000688695.1	d__Bacteria	p__Proteobacteria	c__Gammaproteobacteria	o__Enterobacterales	f__Enterobacteriaceae	g__Lonsdalea	s__Lonsdalea quercina_D	2	0	0	0	0	0	0	0	2
GB_GCA_003158495.1	d__Bacteria	p__Chloroflexota_A	c__Ellin6529	o__CSP1-4	f__CSP1-4	g__Fen-1039	s__Fen-1039 sp003158495	2	0	0	0	0	0	0	0	2
RS_GCF_000519185.1	d__Bacteria	p__Proteobacteria	c__Gammaproteobacteria	o__Burkholderiales	f__Burkholderiaceae	g__Paraburkholderia_B	s__Paraburkholderia_B nodosa	2	0	0	0	0	0	0	0	2
RS_GCF_000716685.1	d__Bacteria	p__Actinobacteriota	c__Actinobacteria	o__Streptomycetales	f__Streptomycetaceae	g__Streptomyces	s__Streptomyces virginiae_A	1	0	1	0	0	0	0	0	2
RS_GCF_001598475.1	d__Bacteria	p__Proteobacteria	c__Gammaproteobacteria	o__Enterobacterales	f__Enterobacteriaceae	g__Pantoea	s__Pantoea agglomerans	2	0	0	0	0	0	0	0	2
RS_GCF_900115015.1	d__Bacteria	p__Bacteroidota	c__Bacteroidia	o__Flavobacteriales	f__Weeksellaceae	g__Algoriella	s__Algoriella xinjiangensis	1	0	1	0	0	0	0	0	2
RS_GCF_002153395.1	d__Bacteria	p__Firmicutes	c__Bacilli	o__Bacillales	f__Bacillaceae	g__Bacillus	s__Bacillus subtilis_G	1	0	0	1	0	0	0	0	2
RS_GCF_000219665.1	d__Bacteria	p__Proteobacteria	c__Alphaproteobacteria	o__Rhizobiales	f__Rhizobiaceae	g__Agrobacterium	s__Agrobacterium tumefaciens_F	2	0	0	0	0	0	0	0	2
RS_GCF_000423605.1	d__Bacteria	p__Proteobacteria	c__Gammaproteobacteria	o__Pseudomonadales	f__Saccharospirillaceae	g__Saccharospirillum	s__Saccharospirillum impatiens	2	0	0	0	0	0	0	0	2
RS_GCF_002156865.1	d__Bacteria	p__Firmicutes	c__Bacilli	o__Bacillales	f__Bacillaceae_G	g__Bacillus_AW	s__Bacillus_AW luciferensis	1	0	0	1	0	0	0	0	2
RS_GCF_000739715.2	d__Bacteria	p__Proteobacteria	c__Alphaproteobacteria	o__Rhodobacterales	f__Rhodobacteraceae	g__Falsirhodobacter	s__Falsirhodobacter sp000739715	2	0	0	0	0	0	0	0	2
RS_GCF_001006565.1	d__Bacteria	p__Proteobacteria	c__Gammaproteobacteria	o__Enterobacterales	f__Enterobacteriaceae	g__Morganella	s__Morganella morganii_A	2	0	0	0	0	0	0	0	2
GB_GCA_003486945.1	d__Bacteria	p__Proteobacteria	c__Alphaproteobacteria	o__Caulobacterales	f__Hyphomonadaceae	g__Hyphomonas	s__Hyphomonas sp003486945	2	0	0	0	0	0	0	0	2
GB_GCA_000961655.1	d__Bacteria	p__Desulfobacterota	c__Desulfobacteria	o__Desulfobacterales	f__Desulfosarcinaceae	g__Desulfatitalea	s__Desulfatitalea sp000961655	2	0	0	0	0	0	0	0	2
RS_GCF_001641285.1	d__Bacteria	p__Proteobacteria	c__Gammaproteobacteria	o__Xanthomonadales	f__Rhodanobacteraceae	g__Dyella_A	s__Dyella_A thiooxydans	2	0	0	0	0	0	0	0	2
RS_GCF_002849735.1	d__Bacteria	p__Actinobacteriota	c__Actinobacteria	o__Mycobacteriales	f__Pseudonocardiaceae	g__Amycolatopsis	s__Amycolatopsis sp002849735	2	0	0	0	0	0	0	0	2
RS_GCF_002192255.1	d__Bacteria	p__Proteobacteria	c__Gammaproteobacteria	o__Xanthomonadales	f__Xanthomonadaceae	g__Stenotrophomonas	s__Stenotrophomonas sp002192255	2	0	0	0	0	0	0	0	2
RS_GCF_000422885.1	d__Bacteria	p__Proteobacteria	c__Gammaproteobacteria	o__Burkholderiales	f__Burkholderiaceae	g__Ottowia	s__Ottowia thiooxydans	2	0	0	0	0	0	0	0	2
RS_GCF_002407245.1	d__Bacteria	p__Proteobacteria	c__Alphaproteobacteria	o__Rhodobacterales	f__Rhodobacteraceae	g__Phaeobacter	s__Phaeobacter piscinae	2	0	0	0	0	0	0	0	2
RS_GCF_002879855.1	d__Bacteria	p__Proteobacteria	c__Gammaproteobacteria	o__Burkholderiales	f__Burkholderiaceae	g__Paraburkholderia_E	s__Paraburkholderia_E soli	2	0	0	0	0	0	0	0	2
RS_GCF_002897375.1	d__Bacteria	p__Deinococcota	c__Deinococci	o__Deinococcales	f__Deinococcaceae	g__Deinococcus	s__Deinococcus aerius	2	0	0	0	0	0	0	0	2
GB_GCA_003096675.1	d__Bacteria	p__Actinobacteriota	c__Actinobacteria	o__Mycobacteriales	f__Pseudonocardiaceae	g__Actinomycetospora	s__Actinomycetospora cinnamomea	2	0	0	0	0	0	0	0	2
RS_GCF_000731955.1	d__Bacteria	p__Proteobacteria	c__Gammaproteobacteria	o__Pseudomonadales	f__Halomonadaceae	g__Halomonas_C	s__Halomonas_C zincidurans	2	0	0	0	0	0	0	0	2
RS_GCF_000300515.1	d__Bacteria	p__Proteobacteria	c__Alphaproteobacteria	o__Rhizobiales	f__Rhizobiaceae	g__Nitratireductor	s__Nitratireductor indicus	2	0	0	0	0	0	0	0	2
RS_GCF_000565325.1	d__Bacteria	p__Proteobacteria	c__Gammaproteobacteria	o__Enterobacterales	f__Vibrionaceae	g__Salinivibrio	s__Salinivibrio socompensis	2	0	0	0	0	0	0	0	2
RS_GCF_001510715.1	d__Bacteria	p__Firmicutes	c__Bacilli	o__Bacillales	f__Bacillaceae_A	g__Bacillus_W	s__Bacillus_W sp001510715	1	0	0	1	0	0	0	0	2
RS_GCF_001375675.1	d__Bacteria	p__Firmicutes	c__Bacilli	o__Bacillales	f__Massilibacteriaceae	g__Massilibacterium	s__Massilibacterium senegalense	1	0	0	1	0	0	0	0	2
RS_GCF_002272075.1	d__Bacteria	p__Firmicutes	c__Bacilli	o__Bacillales	f__Amphibacillaceae	g__Terribacillus	s__Terribacillus saccharophilus_A	1	0	0	1	0	0	0	0	2
GB_GCA_002476945.1	d__Bacteria	p__Proteobacteria	c__Gammaproteobacteria	o__Pseudomonadales	f__Pseudomonadaceae	g__Pseudomonas_A	s__Pseudomonas_A stutzeri_Q	2	0	0	0	0	0	0	0	2
RS_GCF_000829055.1	d__Bacteria	p__Firmicutes	c__Bacilli	o__Lactobacillales	f__Lactobacillaceae	g__Lactobacillus_C	s__Lactobacillus_C casei	2	0	0	0	0	0	0	0	2
RS_GCF_002234615.1	d__Bacteria	p__Firmicutes_I	c__Bacilli_A	o__Paenibacillales	f__Paenibacillaceae	g__Paenibacillus_S	s__Paenibacillus_S rigui	0	0	0	2	0	0	0	0	2
GB_GCA_002470465.1	d__Bacteria	p__Proteobacteria	c__Gammaproteobacteria	o__Enterobacterales	f__Enterobacteriaceae	g__Pluralibacter	s__Pluralibacter sp002470465	2	0	0	0	0	0	0	0	2
RS_GCF_900102265.1	d__Bacteria	p__Bacteroidota	c__Bacteroidia	o__Flavobacteriales	f__Weeksellaceae	g__Chryseobacterium_B	s__Chryseobacterium_B hungaricum	1	0	1	0	0	0	0	0	2
RS_GCF_000272405.2	d__Bacteria	p__Proteobacteria	c__Gammaproteobacteria	o__Enterobacterales	f__Vibrionaceae	g__Vibrio	s__Vibrio tasmaniensis	2	0	0	0	0	0	0	0	2
RS_GCF_001613935.1	d__Bacteria	p__Actinobacteriota	c__Actinobacteria	o__Mycobacteriales	f__Pseudonocardiaceae	g__Amycolatopsis	s__Amycolatopsis regifaucium	2	0	0	0	0	0	0	0	2
RS_GCF_000261045.2	d__Bacteria	p__Proteobacteria	c__Gammaproteobacteria	o__Enterobacterales	f__Enterobacteriaceae	g__Serratia	s__Serratia plymuthica_A	2	0	0	0	0	0	0	0	2
RS_GCF_002937115.1	d__Bacteria	p__Proteobacteria	c__Alphaproteobacteria	o__Acetobacterales	f__Acetobacteraceae	g__Rhodopila	s__Rhodopila globiformis	2	0	0	0	0	0	0	0	2
RS_GCF_000024885.1	d__Bacteria	p__Campylobacterota	c__Campylobacteria	o__Campylobacterales	f__Sulfurospirillaceae	g__Sulfurospirillum	s__Sulfurospirillum deleyianum	1	0	0	0	0	0	1	0	2
RS_GCF_001660385.1	d__Bacteria	p__Actinobacteriota	c__Actinobacteria	o__Streptosporangiales	f__Streptosporangiaceae	g__Thermobifida	s__Thermobifida halotolerans	2	0	0	0	0	0	0	0	2
RS_GCF_900188405.1	d__Bacteria	p__Actinobacteriota	c__Actinobacteria	o__Streptomycetales	f__Streptomycetaceae	g__Streptomyces_B	s__Streptomyces_B glauciniger	1	0	1	0	0	0	0	0	2
RS_GCF_900095695.1	d__Bacteria	p__Proteobacteria	c__Gammaproteobacteria	o__Enterobacterales	f__Enterobacteriaceae	g__Hafnia	s__Hafnia alvei_B	2	0	0	0	0	0	0	0	2
RS_GCF_900090325.1	d__Bacteria	p__Actinobacteriota	c__Actinobacteria	o__Mycobacteriales	f__Micromonosporaceae	g__Micromonospora	s__Micromonospora pallida	2	0	0	0	0	0	0	0	2
RS_GCF_001552555.1	d__Bacteria	p__Actinobacteriota	c__Actinobacteria	o__Streptosporangiales	f__Streptosporangiaceae	g__Nocardiopsis_B	s__Nocardiopsis_B trehalosi	2	0	0	0	0	0	0	0	2
GB_GCA_002729525.1	d__Bacteria	p__Actinobacteriota	c__Actinobacteria	o__Propionibacteriales	f__Nocardioidaceae	g__Nocardioides	s__Nocardioides sp002729525	1	0	1	0	0	0	0	0	2
RS_GCF_002243705.1	d__Bacteria	p__Firmicutes	c__Bacilli	o__Bacillales	f__Anoxybacillaceae	g__Anoxybacillus	s__Anoxybacillus flavithermus	1	0	0	1	0	0	0	0	2
RS_GCF_001654965.1	d__Bacteria	p__Proteobacteria	c__Gammaproteobacteria	o__Enterobacterales	f__Enterobacteriaceae	g__Proteus	s__Proteus hauseri	2	0	0	0	0	0	0	0	2
RS_GCF_001465545.3	d__Bacteria	p__Proteobacteria	c__Gammaproteobacteria	o__Burkholderiales	f__Burkholderiaceae	g__Pandoraea	s__Pandoraea norimbergensis	2	0	0	0	0	0	0	0	2
RS_GCF_003172895.1	d__Bacteria	p__Proteobacteria	c__Gammaproteobacteria	o__Thiotrichales	f__Thiotrichaceae	g__Leucothrix	s__Leucothrix sp003172895	2	0	0	0	0	0	0	0	2
RS_GCF_900141755.1	d__Bacteria	p__Proteobacteria	c__Alphaproteobacteria	o__Rhizobiales	f__Xanthobacteraceae	g__Bradyrhizobium	s__Bradyrhizobium lablabi_A	2	0	0	0	0	0	0	0	2
RS_GCF_000285295.1	d__Bacteria	p__Proteobacteria	c__Alphaproteobacteria	o__Acetobacterales	f__Acetobacteraceae	g__Komagataeibacter	s__Komagataeibacter europaeus	2	0	0	0	0	0	0	0	2
RS_GCF_001544795.2	d__Bacteria	p__Proteobacteria	c__Gammaproteobacteria	o__Burkholderiales	f__Burkholderiaceae	g__Caballeronia	s__Caballeronia temeraria	2	0	0	0	0	0	0	0	2
RS_GCF_001654985.1	d__Bacteria	p__Proteobacteria	c__Gammaproteobacteria	o__Enterobacterales	f__Enterobacteriaceae	g__Kluyvera	s__Kluyvera georgiana	2	0	0	0	0	0	0	0	2
RS_GCF_000960595.1	d__Bacteria	p__Proteobacteria	c__Gammaproteobacteria	o__Enterobacterales	f__Vibrionaceae	g__Vibrio	s__Vibrio sp000960595	2	0	0	0	0	0	0	0	2
RS_GCF_900102675.1	d__Bacteria	p__Proteobacteria	c__Gammaproteobacteria	o__Pseudomonadales	f__Pseudomonadaceae	g__Pseudomonas_E	s__Pseudomonas_E guariconensis	2	0	0	0	0	0	0	0	2
RS_GCF_900129855.1	d__Bacteria	p__Actinobacteriota	c__Actinobacteria	o__Streptomycetales	f__Streptomycetaceae	g__Streptomyces	s__Streptomyces sp900129855	2	0	0	0	0	0	0	0	2
GB_GCA_003449195.1	d__Bacteria	p__Proteobacteria	c__Gammaproteobacteria	o__Xanthomonadales	f__Xanthomonadaceae	g__Xanthomonas_B	s__Xanthomonas_B sp003449195	2	0	0	0	0	0	0	0	2
RS_GCF_900099765.1	d__Bacteria	p__Firmicutes_I	c__Bacilli_A	o__Paenibacillales	f__Paenibacillaceae	g__Paenibacillus	s__Paenibacillus typhae	1	0	0	1	0	0	0	0	2
RS_GCF_000819805.1	d__Bacteria	p__Proteobacteria	c__Gammaproteobacteria	o__Enterobacterales	f__Aeromonadaceae	g__Aeromonas	s__Aeromonas diversa	2	0	0	0	0	0	0	0	2
RS_GCF_000302695.1	d__Bacteria	p__Proteobacteria	c__Gammaproteobacteria	o__Enterobacterales	f__Enterobacteriaceae	g__LSJC7	s__LSJC7 sp000302695	2	0	0	0	0	0	0	0	2
RS_GCF_002750975.1	d__Bacteria	p__Proteobacteria	c__Gammaproteobacteria	o__Xanthomonadales	f__Xanthomonadaceae	g__Stenotrophomonas	s__Stenotrophomonas indicatrix	2	0	0	0	0	0	0	0	2
RS_GCF_000272025.1	d__Bacteria	p__Proteobacteria	c__Gammaproteobacteria	o__Burkholderiales	f__Burkholderiaceae	g__AKCV01	s__AKCV01 sp000272025	2	0	0	0	0	0	0	0	2
GB_GCA_002482525.1	d__Bacteria	p__Actinobacteriota	c__Actinobacteria	o__Propionibacteriales	f__Propionibacteriaceae	g__Propionicimonas	s__Propionicimonas sp002482525	2	0	0	0	0	0	0	0	2
RS_GCF_000730385.1	d__Bacteria	p__Proteobacteria	c__Gammaproteobacteria	o__Enterobacterales	f__Alteromonadaceae	g__Alteromonas	s__Alteromonas australica	2	0	0	0	0	0	0	0	2
GB_GCA_002083655.1	d__Bacteria	p__Proteobacteria	c__Alphaproteobacteria	o__Sphingomonadales	f__Sphingomonadaceae	g__Sphingomonas	s__Sphingomonas sp002083655	2	0	0	0	0	0	0	0	2
RS_GCF_002887595.1	d__Bacteria	p__Proteobacteria	c__Gammaproteobacteria	o__Enterobacterales	f__Alteromonadaceae	g__Bowmanella	s__Bowmanella denitrificans	2	0	0	0	0	0	0	0	2
RS_GCF_001541095.1	d__Bacteria	p__Firmicutes_I	c__Bacilli_A	o__Paenibacillales	f__Paenibacillaceae	g__Paenibacillus_F	s__Paenibacillus_F sp001541095	0	0	0	2	0	0	0	0	2
RS_GCF_001017175.1	d__Bacteria	p__Proteobacteria	c__Alphaproteobacteria	o__Rhizobiales	f__Beijerinckiaceae	g__Microvirga	s__Microvirga vignae	2	0	0	0	0	0	0	0	2
RS_GCF_003055645.1	d__Bacteria	p__Proteobacteria	c__Gammaproteobacteria	o__Pseudomonadales	f__Pseudomonadaceae	g__Pseudomonas_E	s__Pseudomonas_E fluorescens_AR	2	0	0	0	0	0	0	0	2
RS_GCF_002797515.1	d__Bacteria	p__Proteobacteria	c__Alphaproteobacteria	o__Rhizobiales	f__Xanthobacteraceae	g__Bradyrhizobium	s__Bradyrhizobium lablabi_B	2	0	0	0	0	0	0	0	2
RS_GCF_001953355.1	d__Bacteria	p__Proteobacteria	c__Gammaproteobacteria	o__Burkholderiales	f__Burkholderiaceae	g__Polynucleobacter	s__Polynucleobacter sphagniphilus	2	0	0	0	0	0	0	0	2
GB_GCA_000743525.1	d__Bacteria	p__Campylobacterota	c__Campylobacteria	o__Campylobacterales	f__Sulfurospirillaceae	g__Sulfurospirillum	s__Sulfurospirillum sp000743525	1	0	0	0	0	0	1	0	2
RS_GCF_900215435.1	d__Bacteria	p__Proteobacteria	c__Gammaproteobacteria	o__Enterobacterales	f__Enterobacteriaceae	g__Pantoea	s__Pantoea sp900215435	2	0	0	0	0	0	0	0	2
RS_GCF_900116195.1	d__Bacteria	p__Proteobacteria	c__Alphaproteobacteria	o__Rhodobacterales	f__Rhodobacteraceae	g__Salipiger	s__Salipiger pacifica	2	0	0	0	0	0	0	0	2
RS_GCF_900108485.1	d__Bacteria	p__Proteobacteria	c__Gammaproteobacteria	o__Enterobacterales	f__Alteromonadaceae	g__Rheinheimera	s__Rheinheimera pacifica	2	0	0	0	0	0	0	0	2
RS_GCF_000466945.1	d__Bacteria	p__Proteobacteria	c__Alphaproteobacteria	o__Sphingomonadales	f__Sphingomonadaceae	g__Novosphingobium_A	s__Novosphingobium_A tardaugens	2	0	0	0	0	0	0	0	2
RS_GCF_000964285.1	d__Bacteria	p__Proteobacteria	c__Gammaproteobacteria	o__Enterobacterales	f__Enterobacteriaceae	g__Raoultella	s__Raoultella terrigena	2	0	0	0	0	0	0	0	2
RS_GCF_900156025.1	d__Bacteria	p__Proteobacteria	c__Alphaproteobacteria	o__Rhizobiales	f__Beijerinckiaceae	g__Bosea	s__Bosea sp900156025	2	0	0	0	0	0	0	0	2
GB_GCA_003543135.1	d__Bacteria	p__Proteobacteria	c__Gammaproteobacteria	o__Enterobacterales	f__Alteromonadaceae	g__Pararheinheimera	s__Pararheinheimera sp003543135	2	0	0	0	0	0	0	0	2
RS_GCF_000430005.1	d__Bacteria	p__Desulfobacterota_A	c__Desulfovibrionia	o__Desulfovibrionales	f__Desulfovibrionaceae	g__Desulfovibrio_J	s__Desulfovibrio_J cuneatus	1	0	0	0	0	0	1	0	2
RS_GCF_001676055.1	d__Bacteria	p__Proteobacteria	c__Gammaproteobacteria	o__Enterobacterales	f__Enterobacteriaceae	g__Morganella	s__Morganella psychrotolerans_B	2	0	0	0	0	0	0	0	2
RS_GCF_000981895.1	d__Bacteria	p__Actinobacteriota	c__Actinobacteria	o__Streptomycetales	f__Streptomycetaceae	g__Streptomyces	s__Streptomyces odonnellii	1	0	1	0	0	0	0	0	2
RS_GCF_000412335.2	d__Bacteria	p__Proteobacteria	c__Gammaproteobacteria	o__Enterobacterales	f__Enterobacteriaceae	g__Cedecea	s__Cedecea davisae	2	0	0	0	0	0	0	0	2
RS_GCF_001402165.1	d__Bacteria	p__Proteobacteria	c__Gammaproteobacteria	o__Enterobacterales	f__Vibrionaceae	g__Vibrio	s__Vibrio metoecus_B	2	0	0	0	0	0	0	0	2
GB_GCA_002455335.1	d__Bacteria	p__Chloroflexota	c__Anaerolineae	o__Anaerolineales	f__UBA6663	g__UBA6663	s__UBA6663 sp002455335	1	0	0	0	0	0	1	0	2
GB_GCA_002454045.1	d__Bacteria	p__Nitrospinota	c__Nitrospinia	o__Nitrospinales	f__Nitrospinaceae	g__LS-NOB	s__LS-NOB sp002454045	0	0	0	0	0	0	0	2	2
RS_GCF_002878485.1	d__Bacteria	p__Proteobacteria	c__Gammaproteobacteria	o__Pseudomonadales	f__Pseudomonadaceae	g__Pseudomonas_E	s__Pseudomonas_E sp002878485	2	0	0	0	0	0	0	0	2
RS_GCF_003121485.1	d__Bacteria	p__Proteobacteria	c__Gammaproteobacteria	o__Xanthomonadales	f__Rhodanobacteraceae	g__Dyella	s__Dyella sp003121485	2	0	0	0	0	0	0	0	2
RS_GCF_000814905.1	d__Bacteria	p__Proteobacteria	c__Gammaproteobacteria	o__Enterobacterales	f__Enterobacteriaceae	g__Kosakonia	s__Kosakonia sp000814905	2	0	0	0	0	0	0	0	2
RS_GCF_001455965.1	d__Bacteria	p__Proteobacteria	c__Alphaproteobacteria	o__Rhizobiales	f__Beijerinckiaceae	g__Methylobacterium	s__Methylobacterium sp001455965	2	0	0	0	0	0	0	0	2
RS_GCF_002797315.1	d__Bacteria	p__Firmicutes	c__Bacilli	o__Bacillales	f__Marinococcaceae	g__C254	s__C254 sp002797315	0	0	0	2	0	0	0	0	2
RS_GCF_000801895.1	d__Bacteria	p__Proteobacteria	c__Gammaproteobacteria	o__Pseudomonadales	f__Pseudomonadaceae	g__Pseudomonas_E	s__Pseudomonas_E fluorescens_AH	2	0	0	0	0	0	0	0	2
GB_GCA_003140095.1	d__Bacteria	p__Verrucomicrobiota	c__Verrucomicrobiae	o__Pedosphaerales	f__Palsa-1400	g__Palsa-1400	s__Palsa-1400 sp003140095	0	0	2	0	0	0	0	0	2
RS_GCF_000219565.1	d__Bacteria	p__Proteobacteria	c__Gammaproteobacteria	o__Pseudomonadales	f__Halomonadaceae	g__Halomonas	s__Halomonas sp000219565	2	0	0	0	0	0	0	0	2
RS_GCF_900233005.1	d__Bacteria	p__Proteobacteria	c__Gammaproteobacteria	o__Enterobacterales	f__Vibrionaceae	g__Vibrio	s__Vibrio tapetis	2	0	0	0	0	0	0	0	2
RS_GCF_000815185.1	d__Bacteria	p__Proteobacteria	c__Gammaproteobacteria	o__Xanthomonadales	f__Xanthomonadaceae	g__Xanthomonas_A	s__Xanthomonas_A sacchari_A	2	0	0	0	0	0	0	0	2
RS_GCF_000292795.1	d__Bacteria	p__Proteobacteria	c__Gammaproteobacteria	o__Pseudomonadales	f__Pseudomonadaceae	g__Pseudomonas_E	s__Pseudomonas_E fluorescens_H	2	0	0	0	0	0	0	0	2
RS_GCF_900112755.1	d__Bacteria	p__Proteobacteria	c__Alphaproteobacteria	o__Rhodobacterales	f__Rhodobacteraceae	g__Sulfitobacter	s__Sulfitobacter brevis	2	0	0	0	0	0	0	0	2
RS_GCF_001667925.1	d__Bacteria	p__Actinobacteriota	c__Actinobacteria	o__Mycobacteriales	f__Mycobacteriaceae	g__Mycobacterium	s__Mycobacterium sp001667925	2	0	0	0	0	0	0	0	2
RS_GCF_002909485.1	d__Bacteria	p__Proteobacteria	c__Gammaproteobacteria	o__Pseudomonadales	f__Pseudomonadaceae	g__Pseudomonas_A	s__Pseudomonas_A stutzeri_AH	2	0	0	0	0	0	0	0	2
GB_GCA_002862125.1	d__Bacteria	p__Proteobacteria	c__Gammaproteobacteria	o__Methylococcales	f__Methylomonadaceae	g__KS41	s__KS41 sp002862125	2	0	0	0	0	0	0	0	2
RS_GCF_001320245.1	d__Bacteria	p__Proteobacteria	c__Gammaproteobacteria	o__Pseudomonadales	f__Pseudomonadaceae	g__Pseudomonas_E	s__Pseudomonas_E sp001320245	2	0	0	0	0	0	0	0	2
GB_GCA_002484265.1	d__Bacteria	p__Proteobacteria	c__Alphaproteobacteria	o__Caulobacterales	f__Caulobacteraceae	g__Brevundimonas	s__Brevundimonas sp002484265	2	0	0	0	0	0	0	0	2
GB_GCA_000721375.1	d__Bacteria	p__Actinobacteriota	c__Actinobacteria	o__Streptomycetales	f__Streptomycetaceae	g__Streptomyces	s__Streptomyces sp000721375	2	0	0	0	0	0	0	0	2
RS_GCF_000227705.2	d__Bacteria	p__Firmicutes_I	c__Bacilli_A	o__Paenibacillales	f__Paenibacillaceae	g__Thermobacillus	s__Thermobacillus composti	2	0	0	0	0	0	0	0	2
RS_GCF_003206155.1	d__Bacteria	p__Proteobacteria	c__Gammaproteobacteria	o__Pseudomonadales	f__Halomonadaceae	g__Salinicola	s__Salinicola halophilus	2	0	0	0	0	0	0	0	2
GB_GCA_003158255.1	d__Bacteria	p__Proteobacteria	c__Gammaproteobacteria	o__Burkholderiales	f__Rhodocyclaceae	g__Fen-999	s__Fen-999 sp003158255	2	0	0	0	0	0	0	0	2
RS_GCF_000235425.2	d__Bacteria	p__Actinobacteriota	c__Actinobacteria	o__Frankiales	f__Frankiaceae	g__Frankia	s__Frankia saprophytica	1	0	1	0	0	0	0	0	2
RS_GCF_000304315.1	d__Bacteria	p__Proteobacteria	c__Alphaproteobacteria	o__Rhizobiales	f__Beijerinckiaceae	g__Methylocystis	s__Methylocystis sp000304315	2	0	0	0	0	0	0	0	2
RS_GCF_000164865.1	d__Bacteria	p__Proteobacteria	c__Gammaproteobacteria	o__Enterobacterales	f__Enterobacteriaceae	g__Enterobacter_B	s__Enterobacter_B lignolyticus	2	0	0	0	0	0	0	0	2
RS_GCF_002933415.1	d__Bacteria	p__Proteobacteria	c__Gammaproteobacteria	o__Burkholderiales	f__Burkholderiaceae	g__Schlegelella	s__Schlegelella thermodepolymerans	2	0	0	0	0	0	0	0	2
RS_GCF_001687335.1	d__Bacteria	p__Desulfobacterota	c__Dissulfuribacteria	o__Dissulfuribacterales	f__Dissulfuribacteraceae	g__Dissulfuribacter	s__Dissulfuribacter thermophilus	1	0	0	0	0	0	1	0	2
RS_GCF_900115165.1	d__Bacteria	p__Proteobacteria	c__Alphaproteobacteria	o__Rhodobacterales	f__Rhodobacteraceae	g__Roseovarius	s__Roseovarius lutimaris	2	0	0	0	0	0	0	0	2
RS_GCF_900104455.1	d__Bacteria	p__Firmicutes_C	c__Negativicutes	o__Selenomonadales	f__Dendrosporobacteraceae	g__Dendrosporobacter	s__Dendrosporobacter quercicolus	2	0	0	0	0	0	0	0	2
RS_GCF_002754655.1	d__Bacteria	p__Actinobacteriota	c__Actinobacteria	o__Mycobacteriales	f__Micromonosporaceae	g__Micromonospora	s__Micromonospora sp002754655	2	0	0	0	0	0	0	0	2
GB_GCA_002347185.1	d__Bacteria	p__Desulfobacterota	c__Desulfobulbia	o__Desulfobulbales	f__Desulfurivibrionaceae	g__UBA2262	s__UBA2262 sp002347185	1	0	0	0	0	0	1	0	2
RS_GCF_002865585.1	d__Bacteria	p__Actinobacteriota	c__Actinobacteria	o__Propionibacteriales	f__Nocardioidaceae	g__Nocardioides	s__Nocardioides sp002865585	1	0	1	0	0	0	0	0	2
RS_GCF_000425165.1	d__Bacteria	p__Proteobacteria	c__Gammaproteobacteria	o__Enterobacterales	f__Vibrionaceae	g__Photobacterium	s__Photobacterium halotolerans	2	0	0	0	0	0	0	0	2
RS_GCF_000716875.1	d__Bacteria	p__Actinobacteriota	c__Actinobacteria	o__Streptomycetales	f__Streptomycetaceae	g__Kitasatospora	s__Kitasatospora novaecaesareae	2	0	0	0	0	0	0	0	2
RS_GCF_001591665.1	d__Bacteria	p__Firmicutes	c__Bacilli	o__Bacillales	f__Bacillaceae_A	g__Bacillus_W	s__Bacillus_W soli	0	0	0	2	0	0	0	0	2
GB_GCA_003153055.1	d__Bacteria	p__Myxococcota	c__Myxococcia	o__Myxococcales	f__Myxococcaceae	g__FEN-1143	s__FEN-1143 sp003153055	0	0	0	0	0	0	2	0	2
GB_GCA_002257205.1	d__Bacteria	p__Proteobacteria	c__Alphaproteobacteria	o__Rhizobiales	f__Xanthobacteraceae	g__Azorhizobium	s__Azorhizobium sp002257205	2	0	0	0	0	0	0	0	2
RS_GCF_900177275.1	d__Bacteria	p__Proteobacteria	c__Gammaproteobacteria	o__Burkholderiales	f__Chromobacteriaceae	g__Pseudogulbenkiania	s__Pseudogulbenkiania subflava	2	0	0	0	0	0	0	0	2
RS_GCF_000231075.2	d__Bacteria	p__Actinobacteriota	c__Actinobacteria	o__Mycobacteriales	f__Pseudonocardiaceae	g__Amycolatopsis	s__Amycolatopsis sp000231075	2	0	0	0	0	0	0	0	2
RS_GCF_001419745.1	d__Bacteria	p__Actinobacteriota	c__Actinobacteria	o__Streptomycetales	f__Streptomycetaceae	g__Streptomyces	s__Streptomyces silaceus	2	0	0	0	0	0	0	0	2
RS_GCF_003050705.1	d__Bacteria	p__Proteobacteria	c__Alphaproteobacteria	o__Sphingomonadales	f__Sphingomonadaceae	g__Sphingomonas	s__Sphingomonas aurantiaca	2	0	0	0	0	0	0	0	2
RS_GCF_001922575.1	d__Bacteria	p__Proteobacteria	c__Gammaproteobacteria	o__Pseudomonadales	f__Nitrincolaceae	g__Neptunomonas	s__Neptunomonas phycophila	2	0	0	0	0	0	0	0	2
RS_GCF_000168975.1	d__Bacteria	p__Proteobacteria	c__Alphaproteobacteria	o__Rhizobiales	f__Stappiaceae	g__Labrenzia	s__Labrenzia aggregata	2	0	0	0	0	0	0	0	2
RS_GCF_001660175.1	d__Bacteria	p__Proteobacteria	c__Gammaproteobacteria	o__Enterobacterales	f__Enterobacteriaceae	g__Escherichia	s__Escherichia sp001660175	2	0	0	0	0	0	0	0	2
RS_GCF_001399975.1	d__Bacteria	p__Proteobacteria	c__Gammaproteobacteria	o__Enterobacterales	f__Alteromonadaceae	g__Pseudoalteromonas	s__Pseudoalteromonas sp001399975	2	0	0	0	0	0	0	0	2
RS_GCF_002939945.1	d__Bacteria	p__Proteobacteria	c__Gammaproteobacteria	o__Xanthomonadales	f__Xanthomonadaceae	g__Xanthomonas	s__Xanthomonas arboricola_A	2	0	0	0	0	0	0	0	2
RS_GCF_001310255.1	d__Bacteria	p__Proteobacteria	c__Alphaproteobacteria	o__Caulobacterales	f__Caulobacteraceae	g__Brevundimonas	s__Brevundimonas sp001310255	2	0	0	0	0	0	0	0	2
RS_GCF_900187975.1	d__Bacteria	p__Proteobacteria	c__Gammaproteobacteria	o__Pseudomonadales	f__Pseudomonadaceae	g__Pseudomonas	s__Pseudomonas delhiensis	2	0	0	0	0	0	0	0	2
RS_GCF_001429025.1	d__Bacteria	p__Proteobacteria	c__Alphaproteobacteria	o__Caulobacterales	f__Caulobacteraceae	g__Phenylobacterium	s__Phenylobacterium sp001429025	2	0	0	0	0	0	0	0	2
RS_GCF_002154605.1	d__Bacteria	p__Actinobacteriota	c__Actinobacteria	o__Streptomycetales	f__Streptomycetaceae	g__Streptomyces	s__Streptomyces milbemycinicus	1	0	1	0	0	0	0	0	2
RS_GCF_000473225.1	d__Bacteria	p__Proteobacteria	c__Alphaproteobacteria	o__Rhodobacterales	f__Rhodobacteraceae	g__Sedimentitalea	s__Sedimentitalea nanhaiensis	2	0	0	0	0	0	0	0	2
GB_GCA_001898965.1	d__Bacteria	p__Proteobacteria	c__Alphaproteobacteria	o__Rhizobiales	f__Beijerinckiaceae	g__28-YEA-48	s__28-YEA-48 sp001898965	2	0	0	0	0	0	0	0	2
GB_GCA_002452915.1	d__Bacteria	p__Campylobacterota	c__Campylobacteria	o__Campylobacterales	f__Arcobacteraceae	g__Aliarcobacter	s__Aliarcobacter sp002452915	1	0	0	0	0	0	1	0	2
RS_GCF_002871005.1	d__Bacteria	p__Proteobacteria	c__Alphaproteobacteria	o__Rhodobacterales	f__Rhodobacteraceae	g__Defluviimonas_A	s__Defluviimonas_A sp002871005	2	0	0	0	0	0	0	0	2
GB_GCA_003165275.1	d__Bacteria	p__Proteobacteria	c__Alphaproteobacteria	o__Caulobacterales	f__Caulobacteraceae	g__BOG-935	s__BOG-935 sp003165275	1	0	0	0	0	0	1	0	2
RS_GCF_900100925.1	d__Bacteria	p__Actinobacteriota	c__Actinobacteria	o__Mycobacteriales	f__Pseudonocardiaceae	g__Actinopolyspora	s__Actinopolyspora saharensis	1	0	1	0	0	0	0	0	2
RS_GCF_900089855.1	d__Bacteria	p__Proteobacteria	c__Gammaproteobacteria	o__Enterobacterales	f__Vibrionaceae	g__Vibrio	s__Vibrio atlanticus	2	0	0	0	0	0	0	0	2
RS_GCF_000799715.1	d__Bacteria	p__Proteobacteria	c__Alphaproteobacteria	o__Rhizobiales	f__Rhizobiaceae	g__Rhizobium	s__Rhizobium rhizogenes_C	2	0	0	0	0	0	0	0	2
RS_GCF_000758545.1	d__Bacteria	p__Firmicutes_I	c__Bacilli_A	o__Paenibacillales	f__Paenibacillaceae	g__Paenibacillus	s__Paenibacillus sp000758545	1	0	0	1	0	0	0	0	2
RS_GCF_001467615.1	d__Bacteria	p__Proteobacteria	c__Gammaproteobacteria	o__Legionellales	f__Legionellaceae	g__Legionella_C	s__Legionella_C erythra	2	0	0	0	0	0	0	0	2
RS_GCF_001547735.1	d__Bacteria	p__Thermosulfidibacterota	c__Thermosulfidibacteria	o__Thermosulfidibacterales	f__Thermosulfidibacteraceae	g__Thermosulfidibacter	s__Thermosulfidibacter takaii	1	0	0	0	0	0	1	0	2
GB_GCA_002347745.1	d__Bacteria	p__Desulfobacterota	c__Desulfobulbia	o__Desulfobulbales	f__Desulfocapsaceae	g__UBA2270	s__UBA2270 sp002347745	1	0	0	0	0	0	1	0	2
RS_GCF_001436375.1	d__Bacteria	p__Firmicutes	c__Bacilli	o__Lactobacillales	f__Lactobacillaceae	g__Lactobacillus_N	s__Lactobacillus_N composti	2	0	0	0	0	0	0	0	2
RS_GCF_002138415.1	d__Bacteria	p__Proteobacteria	c__Gammaproteobacteria	o__Xanthomonadales	f__Xanthomonadaceae	g__Stenotrophomonas	s__Stenotrophomonas maltophilia_G	2	0	0	0	0	0	0	0	2
RS_GCF_002563655.1	d__Bacteria	p__Firmicutes	c__Bacilli	o__Bacillales	f__Bacillaceae_B	g__Bacillus_F	s__Bacillus_F sp002563655	0	0	0	2	0	0	0	0	2
RS_GCF_000515395.1	d__Bacteria	p__Actinobacteriota	c__Actinobacteria	o__Jiangellales	f__Jiangellaceae	g__Jiangella	s__Jiangella gansuensis	2	0	0	0	0	0	0	0	2
RS_GCF_000300005.1	d__Bacteria	p__Proteobacteria	c__Gammaproteobacteria	o__Pseudomonadales	f__Alcanivoracaceae	g__Alcanivorax	s__Alcanivorax dieselolei	2	0	0	0	0	0	0	0	2
RS_GCF_000968195.1	d__Bacteria	p__Proteobacteria	c__Gammaproteobacteria	o__Enterobacterales	f__Enterobacteriaceae	g__Xenorhabdus	s__Xenorhabdus doucetiae	2	0	0	0	0	0	0	0	2
RS_GCF_000293885.2	d__Bacteria	p__Proteobacteria	c__Gammaproteobacteria	o__Pseudomonadales	f__Pseudomonadaceae	g__Pseudomonas_E	s__Pseudomonas_E fluorescens_B	2	0	0	0	0	0	0	0	2
GB_GCA_001799285.1	d__Bacteria	p__Desulfobacterota	c__Desulfobulbia	o__Desulfobulbales	f__Desulfurivibrionaceae	g__UBA2262	s__UBA2262 sp001799285	1	0	0	0	0	0	1	0	2
RS_GCF_900143515.1	d__Bacteria	p__Actinobacteriota	c__Actinobacteria	o__Mycobacteriales	f__Micromonosporaceae	g__Micromonospora	s__Micromonospora cremea	2	0	0	0	0	0	0	0	2
RS_GCF_001515305.1	d__Bacteria	p__Proteobacteria	c__Gammaproteobacteria	o__Burkholderiales	f__Chromobacteriaceae	g__Aquitalea	s__Aquitalea pelogenes	2	0	0	0	0	0	0	0	2
RS_GCF_001613465.1	d__Bacteria	p__Actinobacteriota	c__Actinobacteria	o__Mycobacteriales	f__Mycobacteriaceae	g__Nocardia	s__Nocardia niwae	1	0	1	0	0	0	0	0	2
GB_GCA_003489165.1	d__Bacteria	p__Nitrospinota	c__UBA9942	o__UBA9942	f__UBA9942	g__UBA9942	s__UBA9942 sp003489165	0	0	0	0	0	0	0	2	2
RS_GCF_001187615.1	d__Bacteria	p__Firmicutes_I	c__Bacilli_A	o__Thermoactinomycetales	f__Thermoactinomycetaceae	g__CDF	s__CDF sp001187615	1	0	0	1	0	0	0	0	2
RS_GCF_000219045.1	d__Bacteria	p__Proteobacteria	c__Gammaproteobacteria	o__Francisellales	f__Francisellaceae	g__Francisella	s__Francisella sp000219045	2	0	0	0	0	0	0	0	2
GB_GCA_003134045.1	d__Bacteria	p__Proteobacteria	c__Gammaproteobacteria	o__Steroidobacterales	f__Steroidobacteraceae	g__Bog-1198	s__Bog-1198 sp003134045	2	0	0	0	0	0	0	0	2
RS_GCF_000316175.1	d__Bacteria	p__Proteobacteria	c__Gammaproteobacteria	o__Pseudomonadales	f__Pseudomonadaceae	g__Pseudomonas_E	s__Pseudomonas_E sp000316175	2	0	0	0	0	0	0	0	2
RS_GCF_000020325.1	d__Bacteria	p__Aquificota	c__Aquificae	o__Hydrogenothermales	f__Hydrogenothermaceae	g__Sulfurihydrogenibium	s__Sulfurihydrogenibium sp000020325	1	0	0	0	0	0	1	0	2
RS_GCF_000798625.1	d__Bacteria	p__Proteobacteria	c__Gammaproteobacteria	o__Enterobacterales	f__Enterobacteriaceae	g__Xenorhabdus	s__Xenorhabdus sp000798625	2	0	0	0	0	0	0	0	2
RS_GCF_000735525.1	d__Bacteria	p__Proteobacteria	c__Gammaproteobacteria	o__Enterobacterales	f__Enterobacteriaceae	g__Tatumella	s__Tatumella ptyseos	2	0	0	0	0	0	0	0	2
GB_GCA_003221005.1	d__Bacteria	p__Gemmatimonadota	c__Gemmatimonadetes	o__Gemmatimonadales	f__GWC2-71-9	g__AG25	s__AG25 sp003221005	0	0	1	0	0	0	0	1	2
RS_GCF_001467525.1	d__Bacteria	p__Proteobacteria	c__Gammaproteobacteria	o__Legionellales	f__Legionellaceae	g__Legionella	s__Legionella anisa	2	0	0	0	0	0	0	0	2
RS_GCF_002006995.1	d__Bacteria	p__Proteobacteria	c__Gammaproteobacteria	o__Enterobacterales	f__Enterobacteriaceae	g__Izhakiella	s__Izhakiella australiensis	2	0	0	0	0	0	0	0	2
RS_GCF_900172325.1	d__Bacteria	p__Proteobacteria	c__Alphaproteobacteria	o__Sneathiellales	f__Sneathiellaceae	g__Oceanibacterium	s__Oceanibacterium hippocampi	2	0	0	0	0	0	0	0	2
GB_GCA_003105185.1	d__Bacteria	p__Acidobacteriota	c__Thermoanaerobaculia	o__Thermoanaerobaculales	f__FEB-10	g__FEB-10	s__FEB-10 sp003105185	1	0	0	0	0	0	1	0	2
RS_GCF_900240285.1	d__Bacteria	p__Firmicutes	c__Bacilli	o__Bacillales	f__Halobacillaceae	g__Halobacillus_A	s__Halobacillus_A sp900240285	0	0	0	2	0	0	0	0	2
RS_GCF_000397205.1	d__Bacteria	p__Proteobacteria	c__Gammaproteobacteria	o__Pseudomonadales	f__Pseudomonadaceae	g__Pseudomonas_E	s__Pseudomonas_E protegens	2	0	0	0	0	0	0	0	2
RS_GCF_900111815.1	d__Bacteria	p__Firmicutes	c__Bacilli	o__Bacillales	f__Bacillaceae_A	g__Bacillus_AZ	s__Bacillus_AZ mediterraneensis	1	0	0	1	0	0	0	0	2
RS_GCF_000519085.1	d__Bacteria	p__Proteobacteria	c__Alphaproteobacteria	o__Rhizobiales	f__Beijerinckiaceae	g__Methylobacterium	s__Methylobacterium sp000519085	2	0	0	0	0	0	0	0	2
RS_GCF_000568815.1	d__Bacteria	p__Campylobacterota	c__Campylobacteria	o__Campylobacterales	f__Sulfurospirillaceae	g__Sulfurospirillum	s__Sulfurospirillum multivorans	1	0	0	0	0	0	1	0	2
RS_GCF_000421605.1	d__Bacteria	p__Desulfobacterota	c__Thermodesulfobacteria	o__Thermodesulfobacteriales	f__Thermodesulfobacteriaceae	g__Thermodesulfobacterium	s__Thermodesulfobacterium thermophilum	1	0	0	0	0	0	1	0	2
RS_GCF_000827125.1	d__Bacteria	p__Desulfuromonadota	c__Desulfuromonadia	o__Desulfuromonadales	f__Geoalkalibacteraceae	g__Geoalkalibacter_A	s__Geoalkalibacter_A subterraneus	1	0	0	0	0	0	1	0	2
RS_GCF_000026325.1	d__Bacteria	p__Proteobacteria	c__Gammaproteobacteria	o__Enterobacterales	f__Enterobacteriaceae	g__Escherichia	s__Escherichia coli_D	2	0	0	0	0	0	0	0	2
RS_GCF_900102035.1	d__Bacteria	p__Proteobacteria	c__Gammaproteobacteria	o__Pseudomonadales	f__Pseudomonadaceae	g__Pseudomonas_E	s__Pseudomonas_E extremaustralis	2	0	0	0	0	0	0	0	2
GB_GCA_002862515.1	d__Bacteria	p__Proteobacteria	c__Gammaproteobacteria	o__Enterobacterales	f__Alteromonadaceae	g__Rheinheimera	s__Rheinheimera sp002862515	2	0	0	0	0	0	0	0	2
GB_GCA_002412965.1	d__Bacteria	p__Desulfobacterota_A	c__Desulfovibrionia	o__Desulfovibrionales	f__Desulfomicrobiaceae	g__Desulfomicrobium	s__Desulfomicrobium sp002412965	1	0	0	0	0	0	1	0	2
RS_GCF_000023645.1	d__Bacteria	p__Desulfuromonadota	c__Desulfuromonadia	o__Geobacterales	f__Geobacteraceae	g__Geobacter_A	s__Geobacter_A sp000023645	1	0	1	0	0	0	0	0	2
RS_GCF_001654835.1	d__Bacteria	p__Proteobacteria	c__Gammaproteobacteria	o__Enterobacterales	f__Enterobacteriaceae	g__Buttiauxella	s__Buttiauxella gaviniae	2	0	0	0	0	0	0	0	2
RS_GCF_002095435.2	d__Bacteria	p__Actinobacteriota	c__Actinobacteria	o__Mycobacteriales	f__Mycobacteriaceae	g__Williamsia	s__Williamsia sp002095435	1	0	1	0	0	0	0	0	2
RS_GCF_900142365.1	d__Bacteria	p__Actinobacteriota	c__Actinobacteria	o__Mycobacteriales	f__Pseudonocardiaceae	g__Pseudonocardia	s__Pseudonocardia thermophila	2	0	0	0	0	0	0	0	2
RS_GCF_001486505.1	d__Bacteria	p__Firmicutes_I	c__Bacilli_A	o__Paenibacillales	f__Paenibacillaceae	g__Paenibacillus_A	s__Paenibacillus_A rubinfantis	1	0	0	1	0	0	0	0	2
RS_GCF_000701585.1	d__Bacteria	p__Proteobacteria	c__Alphaproteobacteria	o__Acetobacterales	f__Acetobacteraceae	g__Acidiphilium	s__Acidiphilium angustum	2	0	0	0	0	0	0	0	2
RS_GCF_000353565.1	d__Bacteria	p__Firmicutes_I	c__Bacilli_A	o__Brevibacillales	f__Brevibacillaceae	g__Brevibacillus	s__Brevibacillus borstelensis	0	0	0	2	0	0	0	0	2
RS_GCF_000568255.1	d__Bacteria	p__Actinobacteriota	c__Actinobacteria	o__Mycobacteriales	f__Pseudonocardiaceae	g__Kutzneria	s__Kutzneria sp000568255	2	0	0	0	0	0	0	0	2
GB_GCA_003482455.1	d__Bacteria	p__Proteobacteria	c__Gammaproteobacteria	o__Enterobacterales	f__Alteromonadaceae	g__Pararheinheimera	s__Pararheinheimera sp003482455	2	0	0	0	0	0	0	0	2
RS_GCF_003144325.1	d__Bacteria	p__Proteobacteria	c__Gammaproteobacteria	o__Enterobacterales	f__Enterobacteriaceae	g__Proteus	s__Proteus terrae	2	0	0	0	0	0	0	0	2
RS_GCF_002806725.1	d__Bacteria	p__Proteobacteria	c__Gammaproteobacteria	o__Enterobacterales	f__Enterobacteriaceae	g__Raoultella	s__Raoultella sp002806725	2	0	0	0	0	0	0	0	2
RS_GCF_001939735.1	d__Bacteria	p__Proteobacteria	c__Gammaproteobacteria	o__Enterobacterales	f__Vibrionaceae	g__Photobacterium	s__Photobacterium proteolyticum	2	0	0	0	0	0	0	0	2
RS_GCF_001704115.1	d__Bacteria	p__Proteobacteria	c__Gammaproteobacteria	o__Pseudomonadales	f__Moraxellaceae	g__Acinetobacter	s__Acinetobacter larvae	2	0	0	0	0	0	0	0	2
RS_GCF_001553455.1	d__Bacteria	p__Actinobacteriota	c__Actinobacteria	o__Streptomycetales	f__Streptomycetaceae	g__Streptomyces	s__Streptomyces hygroscopicus	1	0	1	0	0	0	0	0	2
GB_GCA_000406125.1	d__Bacteria	p__Proteobacteria	c__Gammaproteobacteria	o__Enterobacterales	f__Enterobacteriaceae	g__Dickeya	s__Dickeya sp000406125	2	0	0	0	0	0	0	0	2
GB_GCA_002869635.1	d__Bacteria	p__Desulfuromonadota	c__Desulfuromonadia	o__Desulfuromonadales	f__BM515	g__BM515	s__BM515 sp002869635	1	0	0	0	0	0	1	0	2
GB_GCA_003248395.1	d__Bacteria	p__Proteobacteria	c__Alphaproteobacteria	o__Sphingomonadales	f__Sphingomonadaceae	g__Erythrobacter_A	s__Erythrobacter_A sp003248395	2	0	0	0	0	0	0	0	2
RS_GCF_003003125.1	d__Bacteria	p__Firmicutes_I	c__Bacilli_A	o__Thermoactinomycetales	f__Thermoactinomycetaceae	g__Laceyella	s__Laceyella sediminis	0	0	0	2	0	0	0	0	2
GB_GCA_000471925.1	d__Bacteria	p__Proteobacteria	c__Gammaproteobacteria	o__Burkholderiales	f__Burkholderiaceae	g__Cupriavidus	s__Cupriavidus pickettii	2	0	0	0	0	0	0	0	2
RS_GCF_003144505.1	d__Bacteria	p__Proteobacteria	c__Gammaproteobacteria	o__Enterobacterales	f__Enterobacteriaceae	g__Proteus	s__Proteus sp003144505	2	0	0	0	0	0	0	0	2
RS_GCF_001879645.1	d__Bacteria	p__Proteobacteria	c__Gammaproteobacteria	o__Francisellales	f__Francisellaceae	g__Francisella	s__Francisella sp001879645	2	0	0	0	0	0	0	0	2
RS_GCF_000313935.1	d__Bacteria	p__Proteobacteria	c__Gammaproteobacteria	o__Pseudomonadales	f__Moraxellaceae	g__Acinetobacter	s__Acinetobacter sp000313935	2	0	0	0	0	0	0	0	2
RS_GCF_001995215.1	d__Bacteria	p__Actinobacteriota	c__Actinobacteria	o__Mycobacteriales	f__Pseudonocardiaceae	g__Amycolatopsis	s__Amycolatopsis azurea	2	0	0	0	0	0	0	0	2
RS_GCF_900186865.1	d__Bacteria	p__Proteobacteria	c__Gammaproteobacteria	o__Xanthomonadales	f__Xanthomonadaceae	g__Stenotrophomonas	s__Stenotrophomonas maltophilia	2	0	0	0	0	0	0	0	2
GB_GCA_003531155.1	d__Bacteria	p__Bacteroidota	c__Bacteroidia	o__Bacteroidales	f__BBW3	g__UBA8529	s__UBA8529 sp003531155	2	0	0	0	0	0	0	0	2
RS_GCF_000399665.1	d__Bacteria	p__Proteobacteria	c__Gammaproteobacteria	o__Pseudomonadales	f__Moraxellaceae	g__Acinetobacter	s__Acinetobacter calcoaceticus_B	2	0	0	0	0	0	0	0	2
RS_GCF_000716545.1	d__Bacteria	p__Actinobacteriota	c__Actinobacteria	o__Streptomycetales	f__Streptomycetaceae	g__Kitasatospora	s__Kitasatospora phosalacinea	1	0	1	0	0	0	0	0	2
RS_GCF_900115505.1	d__Bacteria	p__Actinobacteriota	c__Actinobacteria	o__Mycobacteriales	f__Geodermatophilaceae	g__Geodermatophilus	s__Geodermatophilus sp900115505	2	0	0	0	0	0	0	0	2
GB_GCA_002256345.1	d__Bacteria	p__Proteobacteria	c__Alphaproteobacteria	o__Rhizobiales	f__Xanthobacteraceae	g__Tardiphaga	s__Tardiphaga sp002256345	2	0	0	0	0	0	0	0	2
RS_GCF_002743255.1	d__Bacteria	p__Firmicutes	c__Bacilli	o__Bacillales_A	f__Planococcaceae	g__Sporosarcina	s__Sporosarcina sp002743255	1	0	0	1	0	0	0	0	2
RS_GCF_003063295.1	d__Bacteria	p__Campylobacterota	c__Campylobacteria	o__Campylobacterales	f__Arcobacteraceae	g__Aliarcobacter	s__Aliarcobacter sp003063295	1	0	0	0	0	0	1	0	2
RS_GCF_001514205.1	d__Bacteria	p__Actinobacteriota	c__Actinobacteria	o__Streptomycetales	f__Streptomycetaceae	g__Streptomyces	s__Streptomyces griseoruber	1	0	1	0	0	0	0	0	2
RS_GCF_001581005.1	d__Bacteria	p__Proteobacteria	c__Alphaproteobacteria	o__Acetobacterales	f__Acetobacteraceae	g__Acetobacter	s__Acetobacter orleanensis	2	0	0	0	0	0	0	0	2
RS_GCF_001424705.1	d__Bacteria	p__Proteobacteria	c__Alphaproteobacteria	o__Rhizobiales	f__Beijerinckiaceae	g__Methylobacterium	s__Methylobacterium sp001424705	2	0	0	0	0	0	0	0	2
RS_GCF_000092645.1	d__Bacteria	p__Actinobacteriota	c__Actinobacteria	o__Streptosporangiales	f__Streptosporangiaceae	g__Thermobispora	s__Thermobispora bispora	2	0	0	0	0	0	0	0	2
RS_GCF_000980895.1	d__Bacteria	p__Proteobacteria	c__Alphaproteobacteria	o__Sphingomonadales	f__Sphingomonadaceae	g__Sphingomonas	s__Sphingomonas sp000980895	2	0	0	0	0	0	0	0	2
RS_GCF_001696605.2	d__Bacteria	p__Proteobacteria	c__Gammaproteobacteria	o__Pseudomonadales	f__Moraxellaceae	g__Acinetobacter	s__Acinetobacter sp001696605	2	0	0	0	0	0	0	0	2
RS_GCF_000482745.1	d__Bacteria	p__Desulfobacterota_A	c__Desulfovibrionia	o__Desulfovibrionales	f__Desulfovibrionaceae	g__Desulfovibrio_C	s__Desulfovibrio_C alaskensis	1	0	0	0	0	0	1	0	2
RS_GCF_002335755.1	d__Bacteria	p__Firmicutes	c__Bacilli	o__Bacillales	f__Bacillaceae_I	g__FJAT-45066	s__FJAT-45066 sp002335755	0	0	0	2	0	0	0	0	2
GB_GCA_002327225.1	d__Bacteria	p__Desulfobacterota	c__Desulfobulbia	o__Desulfobulbales	f__Desulfocapsaceae	g__UBA2270	s__UBA2270 sp002327225	1	0	0	0	0	0	1	0	2
GB_GCA_002381565.1	d__Bacteria	p__Proteobacteria	c__Gammaproteobacteria	o__Burkholderiales	f__Gallionellaceae	g__Gallionella	s__Gallionella sp002381565	2	0	0	0	0	0	0	0	2
RS_GCF_001037465.1	d__Bacteria	p__Proteobacteria	c__Gammaproteobacteria	o__Enterobacterales	f__Enterobacteriaceae	g__Xenorhabdus	s__Xenorhabdus khoisanae	2	0	0	0	0	0	0	0	2
RS_GCF_001570565.1	d__Bacteria	p__Actinobacteriota	c__Actinobacteria	o__Streptosporangiales	f__Streptosporangiaceae	g__Herbidospora	s__Herbidospora yilanensis	2	0	0	0	0	0	0	0	2
GB_GCA_002095465.1	d__Bacteria	p__Proteobacteria	c__Gammaproteobacteria	o__Enterobacterales	f__Enterobacteriaceae	g__Pantoea	s__Pantoea rodasii	2	0	0	0	0	0	0	0	2
RS_GCF_002954725.1	d__Bacteria	p__Proteobacteria	c__Gammaproteobacteria	o__Enterobacterales	f__Vibrionaceae	g__Photobacterium	s__Photobacterium phosphoreum	2	0	0	0	0	0	0	0	2
RS_GCF_000425705.1	d__Bacteria	p__Firmicutes	c__Bacilli	o__Bacillales	f__Halobacillaceae	g__Halobacillus	s__Halobacillus kuroshimensis	0	0	0	2	0	0	0	0	2
GB_GCA_002383415.1	d__Bacteria	p__Desulfuromonadota	c__Desulfuromonadia	o__Geobacterales	f__Pelobacteraceae	g__Geobacter_C	s__Geobacter_C sp002383415	1	0	0	0	0	0	1	0	2
RS_GCF_000374205.1	d__Bacteria	p__Proteobacteria	c__Alphaproteobacteria	o__Rhizobiales	f__Xanthobacteraceae	g__Bradyrhizobium	s__Bradyrhizobium japonicum_A	2	0	0	0	0	0	0	0	2
RS_GCF_001297125.1	d__Bacteria	p__Proteobacteria	c__Gammaproteobacteria	o__Pseudomonadales	f__Pseudomonadaceae	g__Pseudomonas_E	s__Pseudomonas_E sp001297125	2	0	0	0	0	0	0	0	2
GB_GCA_001896875.1	d__Bacteria	p__Proteobacteria	c__Alphaproteobacteria	o__Caulobacterales	f__Caulobacteraceae	g__Caulobacter	s__Caulobacter sp001896875	2	0	0	0	0	0	0	0	2
RS_GCF_002005105.1	d__Bacteria	p__Proteobacteria	c__Gammaproteobacteria	o__Methylococcales	f__Methylococcaceae	g__Methylocaldum	s__Methylocaldum sp002005105	2	0	0	0	0	0	0	0	2
RS_GCF_900129865.1	d__Bacteria	p__Firmicutes	c__Bacilli	o__Bacillales	f__Amphibacillaceae	g__Virgibacillus	s__Virgibacillus chiguensis	1	0	0	1	0	0	0	0	2
RS_GCF_001939535.1	d__Bacteria	p__Firmicutes	c__Bacilli	o__Bacillales	f__Bacillaceae	g__Bacillus	s__Bacillus licheniformis_A	1	0	0	1	0	0	0	0	2
GB_GCA_002422505.1	d__Bacteria	p__Desulfobacterota_A	c__Desulfovibrionia	o__Desulfovibrionales	f__Desulfovibrionaceae	g__Desulfovibrio_P	s__Desulfovibrio_P sp002422505	1	0	0	0	0	0	1	0	2
RS_GCF_000444055.1	d__Bacteria	p__Firmicutes_K	c__Alicyclobacillia	o__Alicyclobacillales	f__Alicyclobacillaceae	g__Alicyclobacillus	s__Alicyclobacillus acidoterrestris	2	0	0	0	0	0	0	0	2
RS_GCF_000513095.1	d__Bacteria	p__Firmicutes	c__Bacilli	o__Bacillales	f__Bacillaceae_D	g__Bacillus_L	s__Bacillus_L wakoensis	0	0	0	2	0	0	0	0	2
RS_GCF_900103775.1	d__Bacteria	p__Actinobacteriota	c__Actinobacteria	o__Mycobacteriales	f__Pseudonocardiaceae	g__Allokutzneria	s__Allokutzneria albata	2	0	0	0	0	0	0	0	2
RS_GCF_000717655.1	d__Bacteria	p__Actinobacteriota	c__Actinobacteria	o__Streptomycetales	f__Streptomycetaceae	g__Streptomyces	s__Streptomyces katrae_B	1	0	1	0	0	0	0	0	2
RS_GCF_000744875.1	d__Bacteria	p__Proteobacteria	c__Gammaproteobacteria	o__Thiomicrospirales	f__Thiomicrospiraceae	g__Hydrogenovibrio	s__Hydrogenovibrio sp000744875	1	0	0	0	0	0	1	0	2
RS_GCF_000746875.1	d__Bacteria	p__Firmicutes_I	c__Bacilli_A	o__Paenibacillales	f__Paenibacillaceae	g__Paenibacillus_A	s__Paenibacillus_A macerans	1	0	0	1	0	0	0	0	2
RS_GCF_000272165.2	d__Bacteria	p__Proteobacteria	c__Gammaproteobacteria	o__Enterobacterales	f__Vibrionaceae	g__Vibrio	s__Vibrio kanaloae	2	0	0	0	0	0	0	0	2
RS_GCF_001571285.1	d__Bacteria	p__Proteobacteria	c__Gammaproteobacteria	o__Enterobacterales	f__Enterobacteriaceae	g__Kluyvera	s__Kluyvera cryocrescens	2	0	0	0	0	0	0	0	2
RS_GCF_900111925.1	d__Bacteria	p__Actinobacteriota	c__Actinobacteria	o__Actinomycetales	f__Cellulomonadaceae	g__Cellulomonas	s__Cellulomonas marina	2	0	0	0	0	0	0	0	2
GB_GCA_002582035.1	d__Bacteria	p__Firmicutes	c__Bacilli	o__Bacillales	f__Bacillaceae_G	g__Bacillus_A	s__Bacillus_A pseudomycoides_B	1	0	0	1	0	0	0	0	2
RS_GCF_001274935.1	d__Bacteria	p__Firmicutes	c__Bacilli	o__Bacillales	f__Bacillaceae_H	g__Bacillus_AG	s__Bacillus_AG koreensis	1	0	0	1	0	0	0	0	2
RS_GCF_000024325.1	d__Bacteria	p__Desulfobacterota_A	c__Desulfovibrionia	o__Desulfovibrionales	f__Desulfohalobiaceae	g__Desulfohalobium	s__Desulfohalobium retbaense	1	0	0	0	0	0	1	0	2
RS_GCF_002082245.2	d__Bacteria	p__Proteobacteria	c__Gammaproteobacteria	o__Enterobacterales	f__Enterobacteriaceae	g__Yersinia	s__Yersinia enterocolitica_E	2	0	0	0	0	0	0	0	2
RS_GCF_000425065.1	d__Bacteria	p__Actinobacteriota	c__Actinobacteria	o__Streptosporangiales	f__Streptosporangiaceae	g__Spirillospora	s__Spirillospora rifamycini	2	0	0	0	0	0	0	0	2
RS_GCF_000236165.1	d__Bacteria	p__Proteobacteria	c__Gammaproteobacteria	o__Legionellales	f__Legionellaceae	g__Legionella	s__Legionella dumoffii	2	0	0	0	0	0	0	0	2
RS_GCF_000964525.1	d__Bacteria	p__Myxococcota	c__Myxococcia	o__Myxococcales	f__Anaeromyxobacteraceae	g__Anaeromyxobacter	s__Anaeromyxobacter sp000964525	1	0	1	0	0	0	0	0	2
RS_GCF_001517975.1	d__Bacteria	p__Actinobacteriota	c__Actinobacteria	o__Streptosporangiales	f__Streptosporangiaceae	g__Thermobifida	s__Thermobifida cellulosilytica	2	0	0	0	0	0	0	0	2
RS_GCF_000379445.1	d__Bacteria	p__Proteobacteria	c__Gammaproteobacteria	o__Francisellales	f__Francisellaceae	g__Fangia	s__Fangia hongkongensis	2	0	0	0	0	0	0	0	2
GB_GCA_002422175.1	d__Bacteria	p__Proteobacteria	c__Gammaproteobacteria	o__Burkholderiales	f__Burkholderiaceae	g__SCGC-AAA027-K21	s__SCGC-AAA027-K21 sp002422175	2	0	0	0	0	0	0	0	2
GB_GCA_002280785.1	d__Bacteria	p__Proteobacteria	c__Alphaproteobacteria	o__Caulobacterales	f__Caulobacteraceae	g__Brevundimonas	s__Brevundimonas subvibrioides_B	2	0	0	0	0	0	0	0	2
RS_GCF_001709075.1	d__Bacteria	p__Firmicutes_I	c__Bacilli_A	o__Paenibacillales	f__Paenibacillaceae	g__Paenibacillus	s__Paenibacillus polymyxa_D	1	0	0	1	0	0	0	0	2
RS_GCF_000739915.1	d__Bacteria	p__Firmicutes_I	c__Bacilli_A	o__Paenibacillales	f__Paenibacillaceae	g__Paenibacillus_F	s__Paenibacillus_F chitinolyticus	0	0	0	2	0	0	0	0	2
RS_GCF_900089585.1	d__Bacteria	p__Actinobacteriota	c__Actinobacteria	o__Mycobacteriales	f__Micromonosporaceae	g__Micromonospora	s__Micromonospora sediminicola	2	0	0	0	0	0	0	0	2
GB_GCA_002692525.1	d__Bacteria	p__Proteobacteria	c__Gammaproteobacteria	o__Pseudomonadales	f__Pseudomonadaceae	g__Pseudomonas_A	s__Pseudomonas_A sp002692525	2	0	0	0	0	0	0	0	2
RS_GCF_002335525.1	d__Bacteria	p__Firmicutes_K	c__Alicyclobacillia	o__Tumebacillales	f__Effusibacillaceae	g__Effusibacillus	s__Effusibacillus lacus	1	0	0	1	0	0	0	0	2
RS_GCF_003202005.1	d__Bacteria	p__Actinobacteriota	c__Actinobacteria	o__Mycobacteriales	f__Mycobacteriaceae	g__Williamsia	s__Williamsia faeni	1	0	1	0	0	0	0	0	2
RS_GCF_900114715.1	d__Bacteria	p__Firmicutes	c__Bacilli	o__Bacillales	f__Marinococcaceae	g__Salibacterium	s__Salibacterium qingdaonense	0	0	0	2	0	0	0	0	2
RS_GCF_002918555.1	d__Bacteria	p__Proteobacteria	c__Gammaproteobacteria	o__Enterobacterales	f__Enterobacteriaceae	g__Citrobacter_C	s__Citrobacter_C amalonaticus	2	0	0	0	0	0	0	0	2
GB_GCA_003242885.1	d__Bacteria	p__Cyanobacteria	c__Vampirovibrionia	o__Obscuribacterales	f__Obscuribacteraceae	g__QKMZ01	s__QKMZ01 sp003242885	0	0	1	0	0	0	1	0	2
RS_GCF_002920635.1	d__Bacteria	p__Actinobacteriota	c__Actinobacteria	o__Streptomycetales	f__Streptomycetaceae	g__Streptomyces	s__Streptomyces sp002920635	1	0	1	0	0	0	0	0	2
RS_GCF_000009905.1	d__Bacteria	p__Firmicutes_E	c__Symbiobacteriia	o__Symbiobacteriales	f__Symbiobacteriaceae	g__Symbiobacterium	s__Symbiobacterium thermophilum	1	0	1	0	0	0	0	0	2
RS_GCF_001270575.1	d__Bacteria	p__Actinobacteriota	c__Actinobacteria	o__Streptomycetales	f__Streptomycetaceae	g__Streptomyces	s__Streptomyces decoyicus	1	0	1	0	0	0	0	0	2
RS_GCF_900100605.1	d__Bacteria	p__Actinobacteriota	c__Actinobacteria	o__Streptosporangiales	f__Streptosporangiaceae	g__Sinosporangium	s__Sinosporangium album	1	0	1	0	0	0	0	0	2
RS_GCF_001418565.1	d__Bacteria	p__Actinobacteriota	c__Actinobacteria	o__Streptomycetales	f__Streptomycetaceae	g__Streptomyces	s__Streptomyces graminilatus	1	0	1	0	0	0	0	0	2
GB_GCA_002382645.1	d__Bacteria	p__Desulfobacterota_A	c__Desulfovibrionia	o__Desulfovibrionales	f__Desulfovibrionaceae	g__Desulfovibrio_I	s__Desulfovibrio_I sp002382645	1	0	0	0	0	0	1	0	2
RS_GCF_000721705.1	d__Bacteria	p__Actinobacteriota	c__Actinobacteria	o__Mycobacteriales	f__Micromonosporaceae	g__Actinoplanes	s__Actinoplanes subtropicus	2	0	0	0	0	0	0	0	2
RS_GCF_000719695.1	d__Bacteria	p__Actinobacteriota	c__Actinobacteria	o__Streptomycetales	f__Streptomycetaceae	g__Kitasatospora	s__Kitasatospora sp000719695	2	0	0	0	0	0	0	0	2
RS_GCF_002101875.1	d__Bacteria	p__Actinobacteriota	c__Actinobacteria	o__Mycobacteriales	f__Mycobacteriaceae	g__Mycobacterium	s__Mycobacterium saskatchewanense	1	0	1	0	0	0	0	0	2
RS_GCF_001434295.1	d__Bacteria	p__Firmicutes	c__Bacilli	o__Lactobacillales	f__Lactobacillaceae	g__Lactobacillus_K	s__Lactobacillus_K versmoldensis	2	0	0	0	0	0	0	0	2
RS_GCF_000513215.1	d__Bacteria	p__Proteobacteria	c__Gammaproteobacteria	o__Enterobacterales	f__Enterobacteriaceae	g__Serratia	s__Serratia marcescens_B	2	0	0	0	0	0	0	0	2
RS_GCF_002252045.1	d__Bacteria	p__Proteobacteria	c__Gammaproteobacteria	o__Cardiobacteriales	f__Wohlfahrtiimonadaceae	g__Ignatzschineria	s__Ignatzschineria sp002252045	2	0	0	0	0	0	0	0	2
GB_GCA_003136555.1	d__Bacteria	p__Planctomycetota	c__UBA11346	o__UBA11346	f__UBA11346	g__BOG-1363	s__BOG-1363 sp003136555	1	0	0	0	0	0	1	0	2
GB_GCA_002441135.1	d__Bacteria	p__Firmicutes_I	c__Bacilli_A	o__Tepidibacillales	f__Tepidibacillaceae	g__UBA6259	s__UBA6259 sp002441135	1	0	0	1	0	0	0	0	2
RS_GCF_900113845.1	d__Bacteria	p__Proteobacteria	c__Alphaproteobacteria	o__Rhizobiales	f__Beijerinckiaceae	g__Methylobacterium	s__Methylobacterium brachiatum	2	0	0	0	0	0	0	0	2
GB_GCA_003162255.1	d__Bacteria	p__Acidobacteriota	c__Acidobacteriae	o__Acidobacteriales	f__Koribacteraceae	g__Bog-209	s__Bog-209 sp003162255	1	0	0	0	0	0	1	0	2
RS_GCF_900143625.1	d__Bacteria	p__Actinobacteriota	c__Actinobacteria	o__Streptosporangiales	f__Streptosporangiaceae	g__Nocardiopsis	s__Nocardiopsis sp900143625	2	0	0	0	0	0	0	0	2
RS_GCF_001182895.1	d__Bacteria	p__Proteobacteria	c__Gammaproteobacteria	o__Xanthomonadales	f__Rhodanobacteraceae	g__Fulvimonas	s__Fulvimonas sp001182895	2	0	0	0	0	0	0	0	2
RS_GCF_000701445.1	d__Bacteria	p__Proteobacteria	c__Alphaproteobacteria	o__Caulobacterales	f__Caulobacteraceae	g__Brevundimonas	s__Brevundimonas bacteroides	2	0	0	0	0	0	0	0	2
RS_GCF_001591145.1	d__Bacteria	p__Proteobacteria	c__Gammaproteobacteria	o__Enterobacterales	f__Vibrionaceae	g__Vibrio	s__Vibrio harveyi	2	0	0	0	0	0	0	0	2
RS_GCF_000385135.1	d__Bacteria	p__Actinobacteriota	c__Actinobacteria	o__Actinomycetales	f__Cellulomonadaceae	g__Promicromonospora	s__Promicromonospora sukumoe_B	2	0	0	0	0	0	0	0	2
RS_GCF_001647535.1	d__Bacteria	p__Proteobacteria	c__Gammaproteobacteria	o__Pseudomonadales	f__Moraxellaceae	g__Acinetobacter	s__Acinetobacter sp001647535	2	0	0	0	0	0	0	0	2
RS_GCF_002744735.1	d__Bacteria	p__Proteobacteria	c__Gammaproteobacteria	o__Pseudomonadales	f__Oleiphilaceae	g__Marinobacter	s__Marinobacter guineae	2	0	0	0	0	0	0	0	2
RS_GCF_000277545.1	d__Bacteria	p__Proteobacteria	c__Gammaproteobacteria	o__Enterobacterales	f__Enterobacteriaceae	g__Cedecea	s__Cedecea sp000277545	2	0	0	0	0	0	0	0	2
GB_GCA_002501105.1	d__Bacteria	p__Proteobacteria	c__Alphaproteobacteria	o__UBA7887	f__UBA7887	g__UBA7887	s__UBA7887 sp002501105	0	0	0	0	0	0	0	2	2
GB_GCA_003298795.1	d__Bacteria	p__Proteobacteria	c__Gammaproteobacteria	o__Pseudomonadales	f__Halomonadaceae	g__Halomonas	s__Halomonas sulfidaeris	2	0	0	0	0	0	0	0	2
RS_GCF_000420265.1	d__Bacteria	p__Proteobacteria	c__Alphaproteobacteria	o__Caulobacterales	f__Maricaulaceae	g__Oceanicaulis	s__Oceanicaulis alexandrii	2	0	0	0	0	0	0	0	2
RS_GCF_000429965.1	d__Bacteria	p__Desulfobacterota	c__Desulfobulbia	o__Desulfobulbales	f__Desulfobulbaceae	g__Desulfobulbus_A	s__Desulfobulbus_A mediterraneus	1	0	0	0	0	0	1	0	2
GB_GCA_002327465.1	d__Bacteria	p__Campylobacterota	c__Campylobacteria	o__Campylobacterales	f__Sulfurimonadaceae	g__Sulfuricurvum	s__Sulfuricurvum sp002327465	1	0	0	0	0	0	1	0	2
RS_GCF_900068835.1	d__Bacteria	p__Proteobacteria	c__Gammaproteobacteria	o__Enterobacterales	f__Enterobacteriaceae	g__Pantoea	s__Pantoea ludwigii_B	2	0	0	0	0	0	0	0	2
RS_GCF_002153605.1	d__Bacteria	p__Proteobacteria	c__Alphaproteobacteria	o__Acetobacterales	f__Acetobacteraceae	g__Acetobacter	s__Acetobacter malorum_A	2	0	0	0	0	0	0	0	2
RS_GCF_001442805.1	d__Bacteria	p__Proteobacteria	c__Gammaproteobacteria	o__Xanthomonadales	f__Xanthomonadaceae	g__Lysobacter	s__Lysobacter gummosus	2	0	0	0	0	0	0	0	2
GB_GCA_002439285.1	d__Bacteria	p__Firmicutes_I	c__Bacilli_A	o__Paenibacillales	f__Paenibacillaceae	g__Paenibacillus_P	s__Paenibacillus_P sp002439285	1	0	0	1	0	0	0	0	2
GB_GCA_003220795.1	d__Bacteria	p__Gemmatimonadota	c__Gemmatimonadetes	o__Gemmatimonadales	f__GWC2-71-9	g__20CM-4-69-16	s__20CM-4-69-16 sp003220795	0	0	1	0	0	0	0	1	2
RS_GCF_001514305.1	d__Bacteria	p__Actinobacteriota	c__Actinobacteria	o__Streptomycetales	f__Streptomycetaceae	g__Streptomyces	s__Streptomyces sp001514305	2	0	0	0	0	0	0	0	2
GB_GCA_002469305.1	d__Bacteria	p__Campylobacterota	c__Campylobacteria	o__Campylobacterales	f__Sulfurospirillaceae	g__Sulfurospirillum_A	s__Sulfurospirillum_A sp002469305	1	0	0	0	0	0	1	0	2
GB_GCA_900322255.1	d__Bacteria	p__Proteobacteria	c__Gammaproteobacteria	o__Pseudomonadales	f__Moraxellaceae	g__Acinetobacter	s__Acinetobacter fasciculus	2	0	0	0	0	0	0	0	2
RS_GCF_000244955.1	d__Bacteria	p__Actinobacteriota	c__Actinobacteria	o__Mycobacteriales	f__Pseudonocardiaceae	g__Saccharomonospora_A	s__Saccharomonospora_A marina	2	0	0	0	0	0	0	0	2
RS_GCF_000027225.1	d__Bacteria	p__Proteobacteria	c__Gammaproteobacteria	o__Enterobacterales	f__Enterobacteriaceae	g__Xenorhabdus	s__Xenorhabdus bovienii_C	2	0	0	0	0	0	0	0	2
RS_GCF_900102485.1	d__Bacteria	p__Desulfobacterota_A	c__Desulfovibrionia	o__Desulfovibrionales	f__Desulfovibrionaceae	g__Desulfovibrio	s__Desulfovibrio legallii	1	0	0	0	0	0	1	0	2
GB_GCA_900185725.1	d__Bacteria	p__Proteobacteria	c__Alphaproteobacteria	o__Rhizobiales	f__Stappiaceae	g__Stappia	s__Stappia sp900185725	2	0	0	0	0	0	0	0	2
RS_GCF_001427585.1	d__Bacteria	p__Proteobacteria	c__Gammaproteobacteria	o__Xanthomonadales	f__Xanthomonadaceae	g__Pseudoxanthomonas_A	s__Pseudoxanthomonas_A sp001427585	2	0	0	0	0	0	0	0	2
RS_GCF_001562115.1	d__Bacteria	p__Proteobacteria	c__Gammaproteobacteria	o__Enterobacterales	f__Alteromonadaceae	g__Alteromonas	s__Alteromonas stellipolaris	2	0	0	0	0	0	0	0	2
RS_GCF_001043115.1	d__Bacteria	p__Proteobacteria	c__Gammaproteobacteria	o__Xanthomonadales	f__Xanthomonadaceae	g__Xanthomonas_A	s__Xanthomonas_A sp001043115	2	0	0	0	0	0	0	0	2
GB_GCA_001899715.1	d__Bacteria	p__Proteobacteria	c__Alphaproteobacteria	o__Sphingomonadales	f__Sphingomonadaceae	g__Sphingobium	s__Sphingobium sp001899715	2	0	0	0	0	0	0	0	2
RS_GCF_003217735.1	d__Bacteria	p__Proteobacteria	c__Alphaproteobacteria	o__Rhodobacterales	f__Rhodobacteraceae	g__Marinibacterium	s__Marinibacterium sp003217735	2	0	0	0	0	0	0	0	2
RS_GCF_000763315.1	d__Bacteria	p__Firmicutes_I	c__Bacilli_A	o__Thermoactinomycetales	f__Thermoactinomycetaceae	g__Thermoactinomyces_A	s__Thermoactinomyces_A daqus	0	0	0	2	0	0	0	0	2
GB_GCA_003166055.1	d__Bacteria	p__Acidobacteriota	c__Acidobacteriae	o__Acidobacteriales	f__Acidobacteriaceae	g__Terracidiphilus	s__Terracidiphilus sp003166055	1	0	0	0	0	0	1	0	2
RS_GCF_000820125.1	d__Bacteria	p__Proteobacteria	c__Gammaproteobacteria	o__Enterobacterales	f__Aeromonadaceae	g__Aeromonas	s__Aeromonas simiae	2	0	0	0	0	0	0	0	2
RS_GCF_000011365.1	d__Bacteria	p__Proteobacteria	c__Alphaproteobacteria	o__Rhizobiales	f__Xanthobacteraceae	g__Bradyrhizobium	s__Bradyrhizobium diazoefficiens	2	0	0	0	0	0	0	0	2
RS_GCF_000963965.1	d__Bacteria	p__Proteobacteria	c__Alphaproteobacteria	o__Acetobacterales	f__Acetobacteraceae	g__Acetobacter	s__Acetobacter orientalis	2	0	0	0	0	0	0	0	2
RS_GCF_001635605.1	d__Bacteria	p__Proteobacteria	c__Alphaproteobacteria	o__Rhodobacterales	f__Rhodobacteraceae	g__Sulfitobacter	s__Sulfitobacter sp001635605	2	0	0	0	0	0	0	0	2
RS_GCF_000969445.1	d__Bacteria	p__Proteobacteria	c__Alphaproteobacteria	o__Rhizobiales	f__Devosiaceae	g__Devosia	s__Devosia chinhatensis	2	0	0	0	0	0	0	0	2
RS_GCF_001705835.1	d__Bacteria	p__Proteobacteria	c__Gammaproteobacteria	o__Pseudomonadales	f__Pseudomonadaceae	g__Pseudomonas_E	s__Pseudomonas_E sp001705835	2	0	0	0	0	0	0	0	2
RS_GCF_900105925.1	d__Bacteria	p__Actinobacteriota	c__Actinobacteria	o__Jiangellales	f__Jiangellaceae	g__Jiangella	s__Jiangella alkaliphila	2	0	0	0	0	0	0	0	2
GB_GCA_003157875.1	d__Bacteria	p__Chloroflexota_A	c__Ellin6529	o__CSP1-4	f__CSP1-4	g__Fen-1039	s__Fen-1039 sp003157875	2	0	0	0	0	0	0	0	2
RS_GCF_002140155.1	d__Bacteria	p__Actinobacteriota	c__Actinobacteria	o__Mycobacteriales	f__Micromonosporaceae	g__Micromonospora	s__Micromonospora sp002140155	2	0	0	0	0	0	0	0	2
GB_GCA_003139095.1	d__Bacteria	p__Acidobacteriota	c__Acidobacteriae	o__Acidobacteriales	f__Koribacteraceae	g__Bog-209	s__Bog-209 sp003139095	1	0	0	0	0	0	1	0	2
RS_GCF_001659985.1	d__Bacteria	p__Firmicutes	c__Bacilli	o__Bacillales	f__Amphibacillaceae	g__Oceanobacillus	s__Oceanobacillus sp001659985	0	0	0	2	0	0	0	0	2
RS_GCF_900091605.1	d__Bacteria	p__Actinobacteriota	c__Actinobacteria	o__Mycobacteriales	f__Micromonosporaceae	g__Micromonospora	s__Micromonospora tulbaghiae	2	0	0	0	0	0	0	0	2
RS_GCF_000815105.2	d__Bacteria	p__Proteobacteria	c__Gammaproteobacteria	o__Burkholderiales	f__Burkholderiaceae	g__Pandoraea	s__Pandoraea pulmonicola	2	0	0	0	0	0	0	0	2
RS_GCF_000819685.1	d__Bacteria	p__Proteobacteria	c__Gammaproteobacteria	o__Enterobacterales	f__Aeromonadaceae	g__Aeromonas	s__Aeromonas allosaccharophila	2	0	0	0	0	0	0	0	2
RS_GCF_000508185.1	d__Bacteria	p__Proteobacteria	c__Alphaproteobacteria	o__Sphingomonadales	f__Sphingomonadaceae	g__Sphingobium	s__Sphingobium sp000508185	2	0	0	0	0	0	0	0	2
RS_GCF_000607165.1	d__Bacteria	p__Proteobacteria	c__Gammaproteobacteria	o__Burkholderiales	f__Burkholderiaceae	g__Ralstonia	s__Ralstonia pickettii_A	2	0	0	0	0	0	0	0	2
RS_GCF_000714535.1	d__Bacteria	p__Proteobacteria	c__Alphaproteobacteria	o__Rhodobacterales	f__Rhodobacteraceae	g__Thioclava	s__Thioclava pacifica	2	0	0	0	0	0	0	0	2
RS_GCF_000241465.1	d__Bacteria	p__Proteobacteria	c__Alphaproteobacteria	o__Sphingomonadales	f__Sphingomonadaceae	g__Sphingomonas	s__Sphingomonas echinoides	2	0	0	0	0	0	0	0	2
RS_GCF_000517145.1	d__Bacteria	p__Proteobacteria	c__Alphaproteobacteria	o__Rhizobiales	f__Rhizobiaceae	g__Mesorhizobium	s__Mesorhizobium loti_B	2	0	0	0	0	0	0	0	2
RS_GCF_000743355.1	d__Bacteria	p__Proteobacteria	c__Gammaproteobacteria	o__Enterobacterales	f__Enterobacteriaceae	g__Chania	s__Chania sp000743355	2	0	0	0	0	0	0	0	2
RS_GCF_000368625.1	d__Bacteria	p__Proteobacteria	c__Gammaproteobacteria	o__Pseudomonadales	f__Moraxellaceae	g__Acinetobacter	s__Acinetobacter schindleri	2	0	0	0	0	0	0	0	2
GB_GCA_002706025.1	d__Bacteria	p__Proteobacteria	c__Gammaproteobacteria	o__Pseudomonadales	f__Saccharospirillaceae	g__UBA2009	s__UBA2009 sp002706025	2	0	0	0	0	0	0	0	2
GB_GCA_003165235.1	d__Bacteria	p__Desulfobacterota	c__Syntrophobacteria	o__Syntrophobacterales	f__Syntrophobacteraceae	g__SbD1	s__SbD1 sp003165235	2	0	0	0	0	0	0	0	2
RS_GCF_000424785.1	d__Bacteria	p__Actinobacteriota	c__Actinobacteria	o__Streptomycetales	f__Streptomycetaceae	g__Streptomyces	s__Streptomyces sp000424785	1	0	1	0	0	0	0	0	2
RS_GCF_001655675.1	d__Bacteria	p__Proteobacteria	c__Gammaproteobacteria	o__Enterobacterales	f__Enterobacteriaceae	g__Mangrovibacter	s__Mangrovibacter phragmitis	2	0	0	0	0	0	0	0	2
RS_GCF_000170915.1	d__Bacteria	p__Proteobacteria	c__Gammaproteobacteria	o__Burkholderiales	f__Burkholderiaceae	g__Limnobacter	s__Limnobacter sp000170915	2	0	0	0	0	0	0	0	2
GB_GCA_003135035.1	d__Bacteria	p__Dormibacterota	c__Dormibacteria	o__UBA8260	f__Bog-877	g__Bog-877	s__Bog-877 sp003135035	0	0	0	0	0	0	0	2	2
GB_GCA_003010405.1	d__Bacteria	p__Acidobacteriota	c__Acidobacteriae	o__Acidobacteriales	f__Koribacteraceae	g__TOLSYN	s__TOLSYN sp003010405	1	0	0	0	0	0	1	0	2
RS_GCF_001271345.1	d__Bacteria	p__Proteobacteria	c__Alphaproteobacteria	o__Rhizobiales	f__Beijerinckiaceae	g__Chelatococcus	s__Chelatococcus sp001271345	2	0	0	0	0	0	0	0	2
RS_GCF_002245495.1	d__Bacteria	p__Proteobacteria	c__Gammaproteobacteria	o__Enterobacterales	f__Aeromonadaceae	g__Oceanimonas	s__Oceanimonas baumannii	2	0	0	0	0	0	0	0	2
RS_GCF_000735715.2	d__Bacteria	p__Bacteroidota	c__Bacteroidia	o__Flavobacteriales	f__Flavobacteriaceae	g__Flavobacterium	s__Flavobacterium chungangense	1	0	0	0	0	0	1	0	2
RS_GCF_900215625.1	d__Bacteria	p__Firmicutes	c__Bacilli	o__Bacillales	f__Amphibacillaceae	g__Terribacillus	s__Terribacillus aidingensis	1	0	0	1	0	0	0	0	2
GB_GCA_002327725.1	d__Bacteria	p__Proteobacteria	c__Gammaproteobacteria	o__UBA10353	f__LS-SOB	g__UBA5682	s__UBA5682 sp002327725	0	0	0	0	0	0	0	2	2
RS_GCF_000808535.1	d__Bacteria	p__Proteobacteria	c__Gammaproteobacteria	o__Enterobacterales	f__Vibrionaceae	g__Vibrio	s__Vibrio sinaloensis_A	2	0	0	0	0	0	0	0	2
RS_GCF_001244635.1	d__Bacteria	p__Proteobacteria	c__Gammaproteobacteria	o__Enterobacterales	f__Enterobacteriaceae	g__Yersinia	s__Yersinia pekkanenii	2	0	0	0	0	0	0	0	2
GB_GCA_003293465.1	d__Bacteria	p__Proteobacteria	c__Gammaproteobacteria	o__Pseudomonadales	f__Pseudomonadaceae	g__Pseudomonas_B	s__Pseudomonas_B oryzihabitans_D	2	0	0	0	0	0	0	0	2
RS_GCF_003201885.1	d__Bacteria	p__Proteobacteria	c__Gammaproteobacteria	o__Enterobacterales	f__Enterobacteriaceae	g__Klebsiella_A	s__Klebsiella_A oxytoca_B	2	0	0	0	0	0	0	0	2
RS_GCF_001612615.1	d__Bacteria	p__Actinobacteriota	c__Actinobacteria	o__Mycobacteriales	f__Mycobacteriaceae	g__Nocardia	s__Nocardia amikacinitolerans	1	0	1	0	0	0	0	0	2
RS_GCF_001890925.1	d__Bacteria	p__Proteobacteria	c__Alphaproteobacteria	o__Rhodobacterales	f__Rhodobacteraceae	g__Planktotalea	s__Planktotalea frisia	2	0	0	0	0	0	0	0	2
GB_GCA_000745515.1	d__Bacteria	p__Actinobacteriota	c__Actinobacteria	o__Propionibacteriales	f__Nocardioidaceae	g__Nocardioides	s__Nocardioides sp000745515	1	0	1	0	0	0	0	0	2
RS_GCF_003015205.1	d__Bacteria	p__Campylobacterota	c__Campylobacteria	o__Campylobacterales	f__Campylobacteraceae	g__Campylobacter_B	s__Campylobacter_B blaseri	1	0	0	0	0	0	1	0	2
RS_GCF_002954545.1	d__Bacteria	p__Proteobacteria	c__Gammaproteobacteria	o__Enterobacterales	f__Alteromonadaceae	g__Psychrosphaera	s__Psychrosphaera saromensis	2	0	0	0	0	0	0	0	2
GB_GCA_002421845.1	d__Bacteria	p__Campylobacterota	c__Campylobacteria	o__Campylobacterales	f__Arcobacteraceae	g__UBA6211	s__UBA6211 sp002421845	1	0	0	0	0	0	1	0	2
RS_GCF_003086795.1	d__Bacteria	p__Proteobacteria	c__Gammaproteobacteria	o__Xanthomonadales	f__Xanthomonadaceae	g__Stenotrophomonas	s__Stenotrophomonas sp003086795	2	0	0	0	0	0	0	0	2
RS_GCF_002150845.1	d__Bacteria	p__Actinobacteriota	c__Actinobacteria	o__Streptomycetales	f__Streptomycetaceae	g__Streptomyces	s__Streptomyces alboverticillatus	1	0	1	0	0	0	0	0	2
RS_GCF_001905345.1	d__Bacteria	p__Actinobacteriota	c__Actinobacteria	o__Streptomycetales	f__Streptomycetaceae	g__Streptomyces	s__Streptomyces uncialis	2	0	0	0	0	0	0	0	2
RS_GCF_000720115.1	d__Bacteria	p__Actinobacteriota	c__Actinobacteria	o__Streptomycetales	f__Streptomycetaceae	g__Streptomyces	s__Streptomyces sp000720115	1	0	1	0	0	0	0	0	2
GB_GCA_001725415.1	d__Bacteria	p__Actinobacteriota	c__Actinobacteria	o__Mycobacteriales	f__Pseudonocardiaceae	g__Pseudonocardia	s__Pseudonocardia sp001725415	2	0	0	0	0	0	0	0	2
RS_GCF_000341125.1	d__Bacteria	p__Actinobacteriota	c__Actinobacteria	o__Streptosporangiales	f__Streptosporangiaceae	g__Nocardiopsis	s__Nocardiopsis lucentensis	2	0	0	0	0	0	0	0	2
RS_GCF_002210435.1	d__Bacteria	p__Actinobacteriota	c__Actinobacteria	o__Mycobacteriales	f__Micromonosporaceae	g__Micromonospora	s__Micromonospora wenchangensis	2	0	0	0	0	0	0	0	2
RS_GCF_002588485.1	d__Bacteria	p__Proteobacteria	c__Gammaproteobacteria	o__Pseudomonadales	f__Pseudomonadaceae	g__Pseudomonas_E	s__Pseudomonas_E putida_A	2	0	0	0	0	0	0	0	2
RS_GCF_900113945.1	d__Bacteria	p__Proteobacteria	c__Gammaproteobacteria	o__Enterobacterales	f__Enterobacteriaceae	g__Xenorhabdus	s__Xenorhabdus mauleonii	2	0	0	0	0	0	0	0	2
RS_GCF_900129975.1	d__Bacteria	p__Desulfobacterota_A	c__Desulfovibrionia	o__Desulfovibrionales	f__Desulfovibrionaceae	g__Halodesulfovibrio	s__Halodesulfovibrio marinisediminis	1	0	0	0	0	0	1	0	2
RS_GCF_002740025.1	d__Bacteria	p__Proteobacteria	c__Gammaproteobacteria	o__Xanthomonadales	f__Xanthomonadaceae	g__Stenotrophomonas	s__Stenotrophomonas maltophilia_O	2	0	0	0	0	0	0	0	2
GB_GCA_002483365.1	d__Bacteria	p__Proteobacteria	c__Gammaproteobacteria	o__Pseudomonadales	f__Cellvibrionaceae	g__Cellvibrio	s__Cellvibrio sp002483365	2	0	0	0	0	0	0	0	2
RS_GCF_000330845.1	d__Bacteria	p__Proteobacteria	c__Gammaproteobacteria	o__Enterobacterales	f__Enterobacteriaceae	g__Pseudocitrobacter	s__Pseudocitrobacter sp000330845	2	0	0	0	0	0	0	0	2
GB_GCA_003057695.2	d__Bacteria	p__Proteobacteria	c__Gammaproteobacteria	o__Enterobacterales	f__Enterobacteriaceae	g__Pseudocitrobacter	s__Pseudocitrobacter sp003057695	2	0	0	0	0	0	0	0	2
RS_GCF_900290365.1	d__Bacteria	p__Desulfobacterota	c__Syntrophobacteria	o__Syntrophobacterales	f__Syntrophobacteraceae	g__SbD1	s__SbD1 sp900290365	2	0	0	0	0	0	0	0	2
RS_GCF_000159955.1	d__Bacteria	p__Firmicutes_I	c__Bacilli_A	o__Paenibacillales	f__Paenibacillaceae	g__Paenibacillus_A	s__Paenibacillus_A sp000159955	1	0	0	1	0	0	0	0	2
RS_GCF_000753865.1	d__Bacteria	p__Proteobacteria	c__Gammaproteobacteria	o__Enterobacterales	f__Alteromonadaceae	g__Alteromonas	s__Alteromonas sp000753865	2	0	0	0	0	0	0	0	2
RS_GCF_002895025.1	d__Bacteria	p__Proteobacteria	c__Alphaproteobacteria	o__Sphingomonadales	f__Sphingomonadaceae	g__Erythrobacter_A	s__Erythrobacter_A sp002895025	2	0	0	0	0	0	0	0	2
RS_GCF_000745265.1	d__Bacteria	p__Proteobacteria	c__Gammaproteobacteria	o__Burkholderiales	f__Burkholderiaceae	g__Massilia	s__Massilia sp000745265	2	0	0	0	0	0	0	0	2
RS_GCF_900156175.1	d__Bacteria	p__Proteobacteria	c__Gammaproteobacteria	o__Burkholderiales	f__Burkholderiaceae	g__Janthinobacterium	s__Janthinobacterium sp900156175	2	0	0	0	0	0	0	0	2
RS_GCF_900163965.1	d__Bacteria	p__Proteobacteria	c__Gammaproteobacteria	o__Enterobacterales	f__Vibrionaceae	g__Vibrio	s__Vibrio ruber	2	0	0	0	0	0	0	0	2
RS_GCF_003015165.1	d__Bacteria	p__Proteobacteria	c__Gammaproteobacteria	o__Enterobacterales	f__Aeromonadaceae	g__Aeromonas	s__Aeromonas rivipollensis	2	0	0	0	0	0	0	0	2
RS_GCF_000026185.1	d__Bacteria	p__Proteobacteria	c__Gammaproteobacteria	o__Enterobacterales	f__Enterobacteriaceae	g__Erwinia	s__Erwinia tasmaniensis	2	0	0	0	0	0	0	0	2
RS_GCF_001715285.2	d__Bacteria	p__Proteobacteria	c__Gammaproteobacteria	o__Nitrococcales	f__Nitrococcaceae	g__Spiribacter	s__Spiribacter sp001715285	2	0	0	0	0	0	0	0	2
GB_GCA_003501385.1	d__Bacteria	p__Proteobacteria	c__Alphaproteobacteria	o__Rhizobiales	f__Rhizobiaceae	g__Allorhizobium	s__Allorhizobium sp003501385	2	0	0	0	0	0	0	0	2
[truncated: 22,707 more rows]

## Sheet: qOR1
Genome	Domain	Phylum	Class	Order	Family	Genus	Species	qOR1	qOR1*
RS_GCF_900078335.1	d__Bacteria	p__Proteobacteria	c__Gammaproteobacteria	o__Burkholderiales	f__Burkholderiaceae	g__Bordetella	s__Bordetella trematum	3	1
RS_GCF_002261265.1	d__Bacteria	p__Proteobacteria	c__Gammaproteobacteria	o__Burkholderiales	f__Burkholderiaceae	g__Bordetella_A	s__Bordetella_A sp002261265	3	1
RS_GCF_000988095.1	d__Bacteria	p__Proteobacteria	c__Gammaproteobacteria	o__Burkholderiales	f__Burkholderiaceae	g__Kerstersia	s__Kerstersia gyiorum	3	1
RS_GCF_000236785.1	d__Bacteria	p__Proteobacteria	c__Gammaproteobacteria	o__Burkholderiales	f__Burkholderiaceae	g__Achromobacter	s__Achromobacter arsenitoxydans	2	1
GB_GCA_000974745.1	d__Bacteria	p__Proteobacteria	c__Gammaproteobacteria	o__Burkholderiales	f__Burkholderiaceae	g__Achromobacter	s__Achromobacter bronchiseptica	2	1
RS_GCF_001571365.1	d__Bacteria	p__Proteobacteria	c__Gammaproteobacteria	o__Burkholderiales	f__Burkholderiaceae	g__Achromobacter	s__Achromobacter denitrificans	2	1
GB_GCA_003096295.1	d__Bacteria	p__Proteobacteria	c__Gammaproteobacteria	o__Burkholderiales	f__Burkholderiaceae	g__Achromobacter	s__Achromobacter dolens	2	1
RS_GCF_002209555.1	d__Bacteria	p__Proteobacteria	c__Gammaproteobacteria	o__Burkholderiales	f__Burkholderiaceae	g__Achromobacter	s__Achromobacter insolitus	2	1
GB_GCA_003096315.1	d__Bacteria	p__Proteobacteria	c__Gammaproteobacteria	o__Burkholderiales	f__Burkholderiaceae	g__Achromobacter	s__Achromobacter insuavis	2	1
RS_GCF_002209535.1	d__Bacteria	p__Proteobacteria	c__Gammaproteobacteria	o__Burkholderiales	f__Burkholderiaceae	g__Achromobacter	s__Achromobacter marplatensis	2	1
RS_GCF_003053425.1	d__Bacteria	p__Proteobacteria	c__Gammaproteobacteria	o__Burkholderiales	f__Burkholderiaceae	g__Achromobacter	s__Achromobacter mucicolens	2	1
RS_GCF_001571245.1	d__Bacteria	p__Proteobacteria	c__Gammaproteobacteria	o__Burkholderiales	f__Burkholderiaceae	g__Achromobacter	s__Achromobacter piechaudii	2	1
RS_GCF_002885955.2	d__Bacteria	p__Proteobacteria	c__Gammaproteobacteria	o__Burkholderiales	f__Burkholderiaceae	g__Achromobacter	s__Achromobacter pulmonis	2	1
RS_GCF_002082135.1	d__Bacteria	p__Proteobacteria	c__Gammaproteobacteria	o__Burkholderiales	f__Burkholderiaceae	g__Achromobacter	s__Achromobacter ruhlandii	2	1
RS_GCF_000633435.1	d__Bacteria	p__Proteobacteria	c__Gammaproteobacteria	o__Burkholderiales	f__Burkholderiaceae	g__Achromobacter	s__Achromobacter sp000633435	2	1
RS_GCF_000757485.1	d__Bacteria	p__Proteobacteria	c__Gammaproteobacteria	o__Burkholderiales	f__Burkholderiaceae	g__Achromobacter	s__Achromobacter sp000757485	2	1
RS_GCF_001270295.1	d__Bacteria	p__Proteobacteria	c__Gammaproteobacteria	o__Burkholderiales	f__Burkholderiaceae	g__Achromobacter	s__Achromobacter sp001270295	2	1
RS_GCF_001298955.1	d__Bacteria	p__Proteobacteria	c__Gammaproteobacteria	o__Burkholderiales	f__Burkholderiaceae	g__Achromobacter	s__Achromobacter sp001298955	2	1
RS_GCF_001299355.1	d__Bacteria	p__Proteobacteria	c__Gammaproteobacteria	o__Burkholderiales	f__Burkholderiaceae	g__Achromobacter	s__Achromobacter sp001299355	2	1
RS_GCF_001299435.1	d__Bacteria	p__Proteobacteria	c__Gammaproteobacteria	o__Burkholderiales	f__Burkholderiaceae	g__Achromobacter	s__Achromobacter sp001299435	2	1
RS_GCF_001428845.1	d__Bacteria	p__Proteobacteria	c__Gammaproteobacteria	o__Burkholderiales	f__Burkholderiaceae	g__Achromobacter	s__Achromobacter sp001428845	2	1
GB_GCA_002331005.1	d__Bacteria	p__Proteobacteria	c__Gammaproteobacteria	o__Burkholderiales	f__Burkholderiaceae	g__Achromobacter	s__Achromobacter sp002331005	2	1
RS_GCF_002902905.1	d__Bacteria	p__Proteobacteria	c__Gammaproteobacteria	o__Burkholderiales	f__Burkholderiaceae	g__Achromobacter	s__Achromobacter sp002902905	2	1
RS_GCF_002975275.1	d__Bacteria	p__Proteobacteria	c__Gammaproteobacteria	o__Burkholderiales	f__Burkholderiaceae	g__Achromobacter	s__Achromobacter sp002975275	2	1
RS_GCF_002812705.1	d__Bacteria	p__Proteobacteria	c__Gammaproteobacteria	o__Burkholderiales	f__Burkholderiaceae	g__Achromobacter	s__Achromobacter spanius	2	1
RS_GCF_002926155.1	d__Bacteria	p__Proteobacteria	c__Gammaproteobacteria	o__Burkholderiales	f__Burkholderiaceae	g__Achromobacter	s__Achromobacter spanius_B	2	1
RS_GCF_001189595.1	d__Bacteria	p__Proteobacteria	c__Gammaproteobacteria	o__Burkholderiales	f__Burkholderiaceae	g__Achromobacter	s__Achromobacter spanius_C	2	1
RS_GCF_001457475.1	d__Bacteria	p__Proteobacteria	c__Gammaproteobacteria	o__Burkholderiales	f__Burkholderiaceae	g__Achromobacter	s__Achromobacter xylosoxidans	2	1
RS_GCF_000165835.1	d__Bacteria	p__Proteobacteria	c__Gammaproteobacteria	o__Burkholderiales	f__Burkholderiaceae	g__Achromobacter	s__Achromobacter xylosoxidans_B	2	1
RS_GCF_002192695.1	d__Bacteria	p__Proteobacteria	c__Gammaproteobacteria	o__Burkholderiales	f__Burkholderiaceae	g__Achromobacter	s__Achromobacter xylosoxidans_C	2	1
RS_GCF_000070465.1	d__Bacteria	p__Proteobacteria	c__Gammaproteobacteria	o__Burkholderiales	f__Burkholderiaceae	g__Bordetella	s__Bordetella avium	2	1
RS_GCF_000067205.1	d__Bacteria	p__Proteobacteria	c__Gammaproteobacteria	o__Burkholderiales	f__Burkholderiaceae	g__Bordetella_A	s__Bordetella_A petrii	2	1
RS_GCF_002261345.1	d__Bacteria	p__Proteobacteria	c__Gammaproteobacteria	o__Burkholderiales	f__Burkholderiaceae	g__Bordetella_A	s__Bordetella_A sp002261345	2	1
RS_GCF_002119665.1	d__Bacteria	p__Proteobacteria	c__Gammaproteobacteria	o__Burkholderiales	f__Burkholderiaceae	g__Bordetella_B	s__Bordetella_B sp002119665	2	1
RS_GCF_001676705.1	d__Bacteria	p__Proteobacteria	c__Gammaproteobacteria	o__Burkholderiales	f__Burkholderiaceae	g__Bordetella_C	s__Bordetella_C bronchialis	2	1
RS_GCF_001433395.1	d__Bacteria	p__Proteobacteria	c__Gammaproteobacteria	o__Burkholderiales	f__Burkholderiaceae	g__Bordetella_C	s__Bordetella_C sp001433395	2	1
RS_GCF_002119685.1	d__Bacteria	p__Proteobacteria	c__Gammaproteobacteria	o__Burkholderiales	f__Burkholderiaceae	g__Bordetella_C	s__Bordetella_C sp002119685	2	1
RS_GCF_002209485.1	d__Bacteria	p__Proteobacteria	c__Gammaproteobacteria	o__Burkholderiales	f__Burkholderiaceae	g__Bordetella_C	s__Bordetella_C sp002209485	2	1
RS_GCF_002261215.1	d__Bacteria	p__Proteobacteria	c__Gammaproteobacteria	o__Burkholderiales	f__Burkholderiaceae	g__Bordetella_C	s__Bordetella_C sp002261215	2	1
RS_GCF_002261225.1	d__Bacteria	p__Proteobacteria	c__Gammaproteobacteria	o__Burkholderiales	f__Burkholderiaceae	g__Bordetella_C	s__Bordetella_C sp002261225	2	1
RS_GCF_002261425.1	d__Bacteria	p__Proteobacteria	c__Gammaproteobacteria	o__Burkholderiales	f__Burkholderiaceae	g__Bordetella_C	s__Bordetella_C sp002261425	2	1
RS_GCF_001592225.1	d__Bacteria	p__Proteobacteria	c__Gammaproteobacteria	o__Burkholderiales	f__Burkholderiaceae	g__Castellaniella	s__Castellaniella caeni	2	1
RS_GCF_003123725.1	d__Bacteria	p__Proteobacteria	c__Gammaproteobacteria	o__Burkholderiales	f__Burkholderiaceae	g__QETA01	s__QETA01 sp003123725	2	1
RS_GCF_001557875.1	d__Bacteria	p__Proteobacteria	c__Gammaproteobacteria	o__Enterobacterales	f__Vibrionaceae	g__Vibrio	s__Vibrio splendidus_F	2	1
RS_GCF_900156745.1	d__Bacteria	p__Proteobacteria	c__Gammaproteobacteria	o__Burkholderiales	f__Burkholderiaceae	g__Achromobacter	s__Achromobacter sp900156745	1	1
RS_GCF_002966795.1	d__Bacteria	p__Proteobacteria	c__Gammaproteobacteria	o__Burkholderiales	f__Burkholderiaceae	g__Achromobacter	s__Achromobacter spanius_D	1	1
RS_GCF_000506985.1	d__Bacteria	p__Proteobacteria	c__Gammaproteobacteria	o__Burkholderiales	f__Burkholderiaceae	g__Advenella	s__Advenella kashmirensis_A	1	1
RS_GCF_003076515.1	d__Bacteria	p__Proteobacteria	c__Gammaproteobacteria	o__Burkholderiales	f__Burkholderiaceae	g__Alcaligenes	s__Alcaligenes aquatilis	1	1
RS_GCF_002443155.1	d__Bacteria	p__Proteobacteria	c__Gammaproteobacteria	o__Burkholderiales	f__Burkholderiaceae	g__Alcaligenes	s__Alcaligenes faecalis	1	1
RS_GCF_001516865.1	d__Bacteria	p__Proteobacteria	c__Gammaproteobacteria	o__Burkholderiales	f__Burkholderiaceae	g__Alcaligenes	s__Alcaligenes faecalis_C	1	1
RS_GCF_000429385.1	d__Bacteria	p__Proteobacteria	c__Gammaproteobacteria	o__Burkholderiales	f__Burkholderiaceae	g__Alcaligenes	s__Alcaligenes phenolicus	1	1
GB_GCA_003521065.1	d__Bacteria	p__Proteobacteria	c__Gammaproteobacteria	o__Burkholderiales	f__Burkholderiaceae	g__Alcaligenes	s__Alcaligenes sp003521065	1	1
RS_GCF_001548475.1	d__Bacteria	p__Proteobacteria	c__Gammaproteobacteria	o__Burkholderiales	f__Burkholderiaceae	g__Bordetella	s__Bordetella hinzii	1	1
RS_GCF_000612485.1	d__Bacteria	p__Proteobacteria	c__Gammaproteobacteria	o__Burkholderiales	f__Burkholderiaceae	g__Bordetella	s__Bordetella holmesii	1	1
GB_GCA_001525555.2	d__Bacteria	p__Proteobacteria	c__Gammaproteobacteria	o__Burkholderiales	f__Burkholderiaceae	g__Bordetella	s__Bordetella pertussis	1	1
RS_GCF_000657795.2	d__Bacteria	p__Proteobacteria	c__Gammaproteobacteria	o__Burkholderiales	f__Burkholderiaceae	g__Bordetella	s__Bordetella pseudohinzii	1	1
RS_GCF_002261335.1	d__Bacteria	p__Proteobacteria	c__Gammaproteobacteria	o__Burkholderiales	f__Burkholderiaceae	g__Bordetella	s__Bordetella sp002261335	1	1
RS_GCF_002261355.1	d__Bacteria	p__Proteobacteria	c__Gammaproteobacteria	o__Burkholderiales	f__Burkholderiaceae	g__Bordetella	s__Bordetella sp002261355	1	1
RS_GCF_002261475.1	d__Bacteria	p__Proteobacteria	c__Gammaproteobacteria	o__Burkholderiales	f__Burkholderiaceae	g__Bordetella	s__Bordetella sp002261475	1	1
RS_GCF_002261185.1	d__Bacteria	p__Proteobacteria	c__Gammaproteobacteria	o__Burkholderiales	f__Burkholderiaceae	g__Bordetella_A	s__Bordetella_A sp002261185	1	1
RS_GCF_900078705.1	d__Bacteria	p__Proteobacteria	c__Gammaproteobacteria	o__Burkholderiales	f__Burkholderiaceae	g__Bordetella_B	s__Bordetella_B ansorpii_A	1	1
RS_GCF_900078315.1	d__Bacteria	p__Proteobacteria	c__Gammaproteobacteria	o__Burkholderiales	f__Burkholderiaceae	g__Bordetella_B	s__Bordetella_B ansorpii_B	1	1
RS_GCF_000382185.1	d__Bacteria	p__Proteobacteria	c__Gammaproteobacteria	o__Burkholderiales	f__Burkholderiaceae	g__Bordetella_B	s__Bordetella_B sp000382185	1	1
RS_GCF_001676725.1	d__Bacteria	p__Proteobacteria	c__Gammaproteobacteria	o__Burkholderiales	f__Burkholderiaceae	g__Bordetella_C	s__Bordetella_C flabilis	1	1
RS_GCF_001704295.1	d__Bacteria	p__Proteobacteria	c__Gammaproteobacteria	o__Burkholderiales	f__Burkholderiaceae	g__Bordetella_C	s__Bordetella_C sp001704295	1	1
RS_GCF_002119725.1	d__Bacteria	p__Proteobacteria	c__Gammaproteobacteria	o__Burkholderiales	f__Burkholderiaceae	g__Bordetella_C	s__Bordetella_C sp002119725	1	1
RS_GCF_900129885.1	d__Bacteria	p__Proteobacteria	c__Gammaproteobacteria	o__Burkholderiales	f__Burkholderiaceae	g__Candidimonas	s__Candidimonas bauzanensis	1	1
RS_GCF_002209565.1	d__Bacteria	p__Proteobacteria	c__Gammaproteobacteria	o__Burkholderiales	f__Burkholderiaceae	g__Candidimonas	s__Candidimonas nitroreducens	1	1
RS_GCF_000209655.1	d__Bacteria	p__Proteobacteria	c__Gammaproteobacteria	o__Burkholderiales	f__Burkholderiaceae	g__Candidimonas	s__Candidimonas sp000209655	1	1
RS_GCF_002849615.1	d__Bacteria	p__Proteobacteria	c__Gammaproteobacteria	o__Burkholderiales	f__Burkholderiaceae	g__Candidimonas	s__Candidimonas sp002849615	1	1
RS_GCF_002849655.1	d__Bacteria	p__Proteobacteria	c__Gammaproteobacteria	o__Burkholderiales	f__Burkholderiaceae	g__Candidimonas	s__Candidimonas sp002849655	1	1
RS_GCF_000612685.1	d__Bacteria	p__Proteobacteria	c__Gammaproteobacteria	o__Burkholderiales	f__Burkholderiaceae	g__Castellaniella	s__Castellaniella defragrans	1	1
GB_GCA_002421865.1	d__Bacteria	p__Proteobacteria	c__Gammaproteobacteria	o__Burkholderiales	f__Burkholderiaceae	g__Castellaniella	s__Castellaniella sp002421865	1	1
GB_GCA_002256145.1	d__Bacteria	p__Proteobacteria	c__Gammaproteobacteria	o__Burkholderiales	f__Burkholderiaceae	g__Limnohabitans	s__Limnohabitans sp002256145	1	1
RS_GCF_900089455.2	d__Bacteria	p__Proteobacteria	c__Gammaproteobacteria	o__Burkholderiales	f__Burkholderiaceae	g__Orrella	s__Orrella dioscoreae	1	1
RS_GCF_002005365.1	d__Bacteria	p__Proteobacteria	c__Gammaproteobacteria	o__Burkholderiales	f__Burkholderiaceae	g__Paenalcaligenes	s__Paenalcaligenes hominis	1	1
GB_GCA_003096595.1	d__Bacteria	p__Proteobacteria	c__Gammaproteobacteria	o__Burkholderiales	f__Burkholderiaceae	g__Pusillimonas	s__Pusillimonas noertemannii	1	1
RS_GCF_002236805.1	d__Bacteria	p__Proteobacteria	c__Gammaproteobacteria	o__Burkholderiales	f__Burkholderiaceae	g__Pusillimonas	s__Pusillimonas sp002236805	1	1
GB_GCA_002359265.1	d__Bacteria	p__Proteobacteria	c__Gammaproteobacteria	o__Burkholderiales	f__Burkholderiaceae	g__Pusillimonas	s__Pusillimonas sp002359265	1	1
GB_GCA_002384935.1	d__Bacteria	p__Proteobacteria	c__Gammaproteobacteria	o__Burkholderiales	f__Burkholderiaceae	g__Pusillimonas	s__Pusillimonas sp002384935	1	1
GB_GCA_002737415.1	d__Bacteria	p__Proteobacteria	c__Gammaproteobacteria	o__Burkholderiales	f__Burkholderiaceae	g__SCGC-AAA027-K21	s__SCGC-AAA027-K21 sp002737415	1	1
RS_GCF_003003055.1	d__Bacteria	p__Proteobacteria	c__Gammaproteobacteria	o__Burkholderiales	f__Burkholderiaceae	g__SCGC-AAA027-K21	s__SCGC-AAA027-K21 sp003003055	1	1
RS_GCF_000019185.1	d__Bacteria	p__Proteobacteria	c__Gammaproteobacteria	o__Enterobacterales	f__Shewanellaceae	g__Shewanella	s__Shewanella halifaxensis	1	1
RS_GCF_000018285.1	d__Bacteria	p__Proteobacteria	c__Gammaproteobacteria	o__Enterobacterales	f__Shewanellaceae	g__Shewanella	s__Shewanella pealeana	1	1
RS_GCF_001048535.1	d__Bacteria	p__Proteobacteria	c__Gammaproteobacteria	o__Enterobacterales	f__Vibrionaceae	g__Vibrio	s__Vibrio crassostreae	1	1
GB_GCA_002741985.1	d__Bacteria	p__Proteobacteria	c__Gammaproteobacteria	o__Enterobacterales	f__Vibrionaceae	g__Vibrio	s__Vibrio rotiferianus	1	1
RS_GCF_001312005.1	d__Bacteria	p__Proteobacteria	c__Gammaproteobacteria	o__Methylococcales	f__Methylomonadaceae	g__Methylomonas	s__Methylomonas koyamae	1	1
RS_GCF_001644025.1	d__Bacteria	p__Proteobacteria	c__Gammaproteobacteria	o__Methylococcales	f__Methylomonadaceae	g__Methylomonas	s__Methylomonas koyamae_A	1	1
RS_GCF_001644045.1	d__Bacteria	p__Proteobacteria	c__Gammaproteobacteria	o__Methylococcales	f__Methylomonadaceae	g__Methylomonas	s__Methylomonas methanica	1	1
RS_GCF_001644035.1	d__Bacteria	p__Proteobacteria	c__Gammaproteobacteria	o__Methylococcales	f__Methylomonadaceae	g__Methylomonas	s__Methylomonas methanica_A	1	1
RS_GCF_000515215.1	d__Bacteria	p__Proteobacteria	c__Gammaproteobacteria	o__Methylococcales	f__Methylomonadaceae	g__Methylomonas	s__Methylomonas sp000515215	1	1
RS_GCF_000702925.1	d__Bacteria	p__Proteobacteria	c__Gammaproteobacteria	o__Methylococcales	f__Methylomonadaceae	g__Methylomonas	s__Methylomonas sp000702925	1	1
GB_GCA_002083615.1	d__Bacteria	p__Proteobacteria	c__Gammaproteobacteria	o__Methylococcales	f__Methylomonadaceae	g__Methylomonas	s__Methylomonas sp002083615	1	1
GB_GCA_002441445.1	d__Bacteria	p__Proteobacteria	c__Gammaproteobacteria	o__Burkholderiales	f__Burkholderiaceae	g__Candidimonas	s__Candidimonas sp002441445	0	1
RS_GCF_002116905.1	d__Bacteria	p__Proteobacteria	c__Gammaproteobacteria	o__Burkholderiales	f__Burkholderiaceae	g__Rhizobacter	s__Rhizobacter gummiphilus	0	1
RS_GCF_900129675.1	d__Bacteria	p__Proteobacteria	c__Alphaproteobacteria	o__Rhizobiales	f__Xanthobacteraceae	g__Bradyrhizobium	s__Bradyrhizobium erythrophlei_A	7	0
RS_GCF_000175575.2	d__Bacteria	p__Proteobacteria	c__Gammaproteobacteria	o__Acidithiobacillales	f__Acidithiobacillaceae	g__Acidithiobacillus	s__Acidithiobacillus caldus	6	0
RS_GCF_000227215.1	d__Bacteria	p__Proteobacteria	c__Gammaproteobacteria	o__Acidithiobacillales	f__Acidithiobacillaceae	g__Acidithiobacillus	s__Acidithiobacillus thiooxidans	6	0
RS_GCF_001544555.2	d__Bacteria	p__Proteobacteria	c__Gammaproteobacteria	o__Burkholderiales	f__Burkholderiaceae	g__Caballeronia	s__Caballeronia udeis	6	0
RS_GCF_001854325.1	d__Bacteria	p__Proteobacteria	c__Gammaproteobacteria	o__Burkholderiales	f__Burkholderiaceae	g__Cupriavidus	s__Cupriavidus sp001854325	6	0
RS_GCF_001634365.1	d__Bacteria	p__Proteobacteria	c__Gammaproteobacteria	o__Burkholderiales	f__Burkholderiaceae	g__Paraburkholderia	s__Paraburkholderia sp001634365	6	0
RS_GCF_002027145.1	d__Bacteria	p__Actinobacteriota	c__Actinobacteria	o__Streptosporangiales	f__Streptosporangiaceae	g__Microbispora	s__Microbispora sp002027145	5	0
RS_GCF_001528665.1	d__Bacteria	p__Actinobacteriota	c__Actinobacteria	o__Streptosporangiales	f__Streptosporangiaceae	g__Microtetraspora	s__Microtetraspora malaysiensis	5	0
RS_GCF_000379885.1	d__Bacteria	p__Actinobacteriota	c__Actinobacteria	o__Streptosporangiales	f__Streptosporangiaceae	g__Nonomuraea	s__Nonomuraea coxensis	5	0
RS_GCF_003001935.1	d__Bacteria	p__Actinobacteriota	c__Actinobacteria	o__Streptosporangiales	f__Streptosporangiaceae	g__Nonomuraea	s__Nonomuraea fuscirosea	5	0
RS_GCF_900109355.1	d__Bacteria	p__Actinobacteriota	c__Actinobacteria	o__Streptosporangiales	f__Streptosporangiaceae	g__Nonomuraea	s__Nonomuraea pusilla	5	0
RS_GCF_000024865.1	d__Bacteria	p__Actinobacteriota	c__Actinobacteria	o__Streptosporangiales	f__Streptosporangiaceae	g__Streptosporangium	s__Streptosporangium roseum	5	0
RS_GCF_900129505.1	d__Bacteria	p__Proteobacteria	c__Alphaproteobacteria	o__Rhizobiales	f__Xanthobacteraceae	g__Bradyrhizobium	s__Bradyrhizobium erythrophlei_D	5	0
RS_GCF_000959445.1	d__Bacteria	p__Proteobacteria	c__Gammaproteobacteria	o__Burkholderiales	f__Burkholderiaceae	g__Burkholderia	s__Burkholderia vietnamiensis	5	0
RS_GCF_000020125.1	d__Bacteria	p__Proteobacteria	c__Gammaproteobacteria	o__Burkholderiales	f__Burkholderiaceae	g__Paraburkholderia	s__Paraburkholderia phytofirmans	5	0
RS_GCF_000178415.2	d__Bacteria	p__Proteobacteria	c__Gammaproteobacteria	o__Burkholderiales	f__Burkholderiaceae	g__Paraburkholderia	s__Paraburkholderia sp000178415	5	0
RS_GCF_002902945.1	d__Bacteria	p__Proteobacteria	c__Gammaproteobacteria	o__Burkholderiales	f__Burkholderiaceae	g__Paraburkholderia_A	s__Paraburkholderia_A caribensis	5	0
RS_GCF_001975725.1	d__Bacteria	p__Proteobacteria	c__Gammaproteobacteria	o__Ectothiorhodospirales	f__Acidihalobacteraceae	g__Acidihalobacter_A	s__Acidihalobacter_A ferrooxidans	5	0
RS_GCF_000280495.2	d__Bacteria	p__Proteobacteria	c__Gammaproteobacteria	o__Enterobacterales	f__Enterobacteriaceae	g__Kosakonia	s__Kosakonia radicincitans	5	0
RS_GCF_001247655.1	d__Bacteria	p__Proteobacteria	c__Gammaproteobacteria	o__Enterobacterales	f__Gallaecimonadaceae	g__Gallaecimonas	s__Gallaecimonas pentaromativorans	5	0
GB_GCA_003298465.1	d__Archaea	p__Halobacterota	c__Halobacteria	o__Halobacteriales	f__Haloadaptaceae	g__H22	s__H22 sp003298465	4	0
RS_GCF_000006805.1	d__Archaea	p__Halobacterota	c__Halobacteria	o__Halobacteriales	f__Halobacteriaceae	g__Halobacterium	s__Halobacterium salinarum	4	0
RS_GCF_000826545.1	d__Bacteria	p__Actinobacteriota	c__Actinobacteria	o__Mycobacteriales	f__Pseudonocardiaceae	g__Kibdelosporangium	s__Kibdelosporangium sp000826545	4	0
RS_GCF_001570545.1	d__Bacteria	p__Actinobacteriota	c__Actinobacteria	o__Streptosporangiales	f__Streptosporangiaceae	g__Herbidospora	s__Herbidospora mongoliensis	4	0
RS_GCF_900156315.1	d__Bacteria	p__Actinobacteriota	c__Actinobacteria	o__Streptosporangiales	f__Streptosporangiaceae	g__Microbispora	s__Microbispora rosea	4	0
RS_GCF_001570365.1	d__Bacteria	p__Actinobacteriota	c__Actinobacteria	o__Streptosporangiales	f__Streptosporangiaceae	g__Microtetraspora	s__Microtetraspora fusca	4	0
RS_GCF_001570385.1	d__Bacteria	p__Actinobacteriota	c__Actinobacteria	o__Streptosporangiales	f__Streptosporangiaceae	g__Microtetraspora	s__Microtetraspora glauca	4	0
RS_GCF_900141985.1	d__Bacteria	p__Actinobacteriota	c__Actinobacteria	o__Streptosporangiales	f__Streptosporangiaceae	g__Nocardiopsis	s__Nocardiopsis flavescens	4	0
RS_GCF_000340945.1	d__Bacteria	p__Actinobacteriota	c__Actinobacteria	o__Streptosporangiales	f__Streptosporangiaceae	g__Nocardiopsis	s__Nocardiopsis synnemataformans	4	0
RS_GCF_000725485.1	d__Bacteria	p__Actinobacteriota	c__Actinobacteria	o__Streptosporangiales	f__Streptosporangiaceae	g__Nonomuraea	s__Nonomuraea candida	4	0
RS_GCF_002850745.1	d__Bacteria	p__Actinobacteriota	c__Actinobacteria	o__Streptosporangiales	f__Streptosporangiaceae	g__Nonomuraea	s__Nonomuraea indica	4	0
GB_GCA_900323885.1	d__Bacteria	p__Actinobacteriota	c__Actinobacteria	o__Streptosporangiales	f__Streptosporangiaceae	g__Nonomuraea	s__Nonomuraea parvosata	4	0
RS_GCF_900111685.1	d__Bacteria	p__Actinobacteriota	c__Actinobacteria	o__Streptosporangiales	f__Streptosporangiaceae	g__Nonomuraea	s__Nonomuraea wenchangensis	4	0
RS_GCF_001653075.1	d__Bacteria	p__Actinobacteriota	c__Actinobacteria	o__Streptosporangiales	f__Streptosporangiaceae	g__Planomonospora	s__Planomonospora sphaerica	4	0
RS_GCF_000721075.1	d__Bacteria	p__Actinobacteriota	c__Actinobacteria	o__Streptosporangiales	f__Streptosporangiaceae	g__Streptosporangium	s__Streptosporangium amethystogenes	4	0
RS_GCF_900113865.1	d__Bacteria	p__Actinobacteriota	c__Actinobacteria	o__Streptosporangiales	f__Streptosporangiaceae	g__Streptosporangium	s__Streptosporangium canum	4	0
RS_GCF_002149035.1	d__Bacteria	p__Actinobacteriota	c__Actinobacteria	o__Streptosporangiales	f__Streptosporangiaceae	g__Streptosporangium	s__Streptosporangium minutum	4	0
RS_GCF_002093975.1	d__Bacteria	p__Actinobacteriota	c__Actinobacteria	o__Streptosporangiales	f__Streptosporangiaceae	g__Thermoactinospora	s__Thermoactinospora rubra	4	0
RS_GCF_000204075.1	d__Bacteria	p__Cyanobacteria	c__Cyanobacteriia	o__Cyanobacteriales	f__Nostocaceae	g__Trichormus	s__Trichormus variabilis	4	0
RS_GCF_900148505.1	d__Bacteria	p__Proteobacteria	c__Alphaproteobacteria	o__Rhizobiales	f__Amorphaceae	g__Pseudoxanthobacter	s__Pseudoxanthobacter soli	4	0
RS_GCF_900234795.1	d__Bacteria	p__Proteobacteria	c__Alphaproteobacteria	o__Rhizobiales	f__Beijerinckiaceae	g__Methylobacterium	s__Methylobacterium extorquens	4	0
RS_GCF_002355515.1	d__Bacteria	p__Proteobacteria	c__Alphaproteobacteria	o__Rhizobiales	f__Beijerinckiaceae	g__Methylobacterium	s__Methylobacterium populi_A	4	0
RS_GCF_003111705.1	d__Bacteria	p__Proteobacteria	c__Alphaproteobacteria	o__Rhizobiales	f__Beijerinckiaceae	g__Methylobacterium	s__Methylobacterium sp003111705	4	0
GB_GCA_900467885.1	d__Bacteria	p__Proteobacteria	c__Alphaproteobacteria	o__Rhizobiales	f__Rhizobiaceae	g__Rhizobium	s__Rhizobium sp900467885	4	0
GB_GCA_002722295.1	d__Bacteria	p__Proteobacteria	c__Alphaproteobacteria	o__Rhizobiales	f__Stappiaceae	g__Stappia	s__Stappia sp002722295	4	0
RS_GCF_900099825.1	d__Bacteria	p__Proteobacteria	c__Alphaproteobacteria	o__Rhizobiales	f__Xanthobacteraceae	g__Bradyrhizobium	s__Bradyrhizobium ottawaense_A	4	0
RS_GCF_000426785.1	d__Bacteria	p__Proteobacteria	c__Alphaproteobacteria	o__Rhizobiales	f__Xanthobacteraceae	g__Bradyrhizobium	s__Bradyrhizobium sp000426785	4	0
RS_GCF_000714545.1	d__Bacteria	p__Proteobacteria	c__Alphaproteobacteria	o__Rhodobacterales	f__Rhodobacteraceae	g__Thioclava	s__Thioclava indica	4	0
RS_GCF_001650735.1	d__Bacteria	p__Proteobacteria	c__Alphaproteobacteria	o__Sphingomonadales	f__Sphingomonadaceae	g__Sphingomonas	s__Sphingomonas sp001650735	4	0
RS_GCF_002847505.1	d__Bacteria	p__Proteobacteria	c__Gammaproteobacteria	o__Acidithiobacillales	f__Acidithiobacillaceae	g__Acidithiobacillus	s__Acidithiobacillus sp002847505	4	0
GB_GCA_001898235.1	d__Bacteria	p__Proteobacteria	c__Gammaproteobacteria	o__Berkiellales	f__Berkiellaceae	g__Berkiella	s__Berkiella sp001898235	4	0
RS_GCF_000724975.1	d__Bacteria	p__Proteobacteria	c__Gammaproteobacteria	o__Burkholderiales	f__Burkholderiaceae	g__Burkholderia	s__Burkholderia cepacia_E	4	0
RS_GCF_000987075.1	d__Bacteria	p__Proteobacteria	c__Gammaproteobacteria	o__Burkholderiales	f__Burkholderiaceae	g__Burkholderia	s__Burkholderia contaminans	4	0
RS_GCF_001718315.1	d__Bacteria	p__Proteobacteria	c__Gammaproteobacteria	o__Burkholderiales	f__Burkholderiaceae	g__Burkholderia	s__Burkholderia diffusa	4	0
RS_GCF_000959505.1	d__Bacteria	p__Proteobacteria	c__Gammaproteobacteria	o__Burkholderiales	f__Burkholderiaceae	g__Burkholderia	s__Burkholderia dolosa	4	0
RS_GCF_000012945.1	d__Bacteria	p__Proteobacteria	c__Gammaproteobacteria	o__Burkholderiales	f__Burkholderiaceae	g__Burkholderia	s__Burkholderia lata	4	0
RS_GCF_001718795.1	d__Bacteria	p__Proteobacteria	c__Gammaproteobacteria	o__Burkholderiales	f__Burkholderiaceae	g__Burkholderia	s__Burkholderia latens	4	0
RS_GCF_000959525.1	d__Bacteria	p__Proteobacteria	c__Gammaproteobacteria	o__Burkholderiales	f__Burkholderiaceae	g__Burkholderia	s__Burkholderia multivorans	4	0
RS_GCF_002563755.1	d__Bacteria	p__Proteobacteria	c__Gammaproteobacteria	o__Burkholderiales	f__Burkholderiaceae	g__Burkholderia	s__Burkholderia sp002563755	4	0
RS_GCF_001718335.1	d__Bacteria	p__Proteobacteria	c__Gammaproteobacteria	o__Burkholderiales	f__Burkholderiaceae	g__Burkholderia	s__Burkholderia territorii	4	0
RS_GCF_001544575.2	d__Bacteria	p__Proteobacteria	c__Gammaproteobacteria	o__Burkholderiales	f__Burkholderiaceae	g__Caballeronia	s__Caballeronia cordobensis	4	0
RS_GCF_001544915.2	d__Bacteria	p__Proteobacteria	c__Gammaproteobacteria	o__Burkholderiales	f__Burkholderiaceae	g__Caballeronia	s__Caballeronia pedi	4	0
RS_GCF_001545075.1	d__Bacteria	p__Proteobacteria	c__Gammaproteobacteria	o__Burkholderiales	f__Burkholderiaceae	g__Caballeronia	s__Caballeronia ptereochthonis	4	0
RS_GCF_002011925.2	d__Bacteria	p__Proteobacteria	c__Gammaproteobacteria	o__Burkholderiales	f__Burkholderiaceae	g__Cupriavidus	s__Cupriavidus sp002011925	4	0
RS_GCF_002278075.1	d__Bacteria	p__Proteobacteria	c__Gammaproteobacteria	o__Burkholderiales	f__Burkholderiaceae	g__Paraburkholderia	s__Paraburkholderia aromaticivorans	4	0
RS_GCF_001645125.1	d__Bacteria	p__Proteobacteria	c__Gammaproteobacteria	o__Burkholderiales	f__Burkholderiaceae	g__Paraburkholderia	s__Paraburkholderia ginsengiterrae	4	0
RS_GCF_900100735.1	d__Bacteria	p__Proteobacteria	c__Gammaproteobacteria	o__Burkholderiales	f__Burkholderiaceae	g__Paraburkholderia	s__Paraburkholderia phenazinium	4	0
RS_GCF_900142845.1	d__Bacteria	p__Proteobacteria	c__Gammaproteobacteria	o__Burkholderiales	f__Burkholderiaceae	g__Paraburkholderia	s__Paraburkholderia phenazinium_A	4	0
RS_GCF_900141745.1	d__Bacteria	p__Proteobacteria	c__Gammaproteobacteria	o__Burkholderiales	f__Burkholderiaceae	g__Paraburkholderia	s__Paraburkholderia phenazinium_B	4	0
RS_GCF_000092885.1	d__Bacteria	p__Proteobacteria	c__Gammaproteobacteria	o__Burkholderiales	f__Burkholderiaceae	g__Paraburkholderia	s__Paraburkholderia sp000092885	4	0
RS_GCF_000745015.1	d__Bacteria	p__Proteobacteria	c__Gammaproteobacteria	o__Burkholderiales	f__Burkholderiaceae	g__Paraburkholderia	s__Paraburkholderia sp000745015	4	0
RS_GCF_900104795.1	d__Bacteria	p__Proteobacteria	c__Gammaproteobacteria	o__Burkholderiales	f__Burkholderiaceae	g__Paraburkholderia	s__Paraburkholderia sp900104795	4	0
RS_GCF_900230185.1	d__Bacteria	p__Proteobacteria	c__Gammaproteobacteria	o__Burkholderiales	f__Burkholderiaceae	g__Paraburkholderia	s__Paraburkholderia sp900230185	4	0
RS_GCF_000013645.1	d__Bacteria	p__Proteobacteria	c__Gammaproteobacteria	o__Burkholderiales	f__Burkholderiaceae	g__Paraburkholderia	s__Paraburkholderia xenovorans	4	0
RS_GCF_002902965.1	d__Bacteria	p__Proteobacteria	c__Gammaproteobacteria	o__Burkholderiales	f__Burkholderiaceae	g__Paraburkholderia_A	s__Paraburkholderia_A hospita	4	0
GB_GCA_001319865.1	d__Bacteria	p__Proteobacteria	c__Gammaproteobacteria	o__Burkholderiales	f__Burkholderiaceae	g__Paraburkholderia_A	s__Paraburkholderia_A sp001319865	4	0
RS_GCF_003121405.1	d__Bacteria	p__Proteobacteria	c__Gammaproteobacteria	o__Burkholderiales	f__Burkholderiaceae	g__Paraburkholderia_A	s__Paraburkholderia_A sp003121405	4	0
RS_GCF_000685015.1	d__Bacteria	p__Proteobacteria	c__Gammaproteobacteria	o__Burkholderiales	f__Burkholderiaceae	g__Paraburkholderia_B	s__Paraburkholderia_B bannensis	4	0
RS_GCF_002917095.1	d__Bacteria	p__Proteobacteria	c__Gammaproteobacteria	o__Burkholderiales	f__Burkholderiaceae	g__Paraburkholderia_B	s__Paraburkholderia_B eburnea	4	0
RS_GCF_000685035.1	d__Bacteria	p__Proteobacteria	c__Gammaproteobacteria	o__Burkholderiales	f__Burkholderiaceae	g__Paraburkholderia_B	s__Paraburkholderia_B ferrariae	4	0
GB_GCA_003268775.1	d__Bacteria	p__Proteobacteria	c__Gammaproteobacteria	o__Burkholderiales	f__Burkholderiaceae	g__Paraburkholderia_B	s__Paraburkholderia_B unamae	4	0
RS_GCF_001078575.1	d__Bacteria	p__Proteobacteria	c__Gammaproteobacteria	o__Burkholderiales	f__Burkholderiaceae	g__Ralstonia	s__Ralstonia sp001078575	4	0
RS_GCF_003202035.1	d__Bacteria	p__Proteobacteria	c__Gammaproteobacteria	o__Burkholderiales	f__Chromobacteriaceae	g__Aquitalea	s__Aquitalea magnusonii	4	0
GB_GCA_002909855.2	d__Bacteria	p__Proteobacteria	c__Gammaproteobacteria	o__Burkholderiales	f__Chromobacteriaceae	g__Aquitalea	s__Aquitalea sp002909855	4	0
RS_GCF_000155975.1	d__Bacteria	p__Proteobacteria	c__Gammaproteobacteria	o__Enterobacterales	f__Enterobacteriaceae	g__Citrobacter	s__Citrobacter portucalensis_A	4	0
RS_GCF_000759755.1	d__Bacteria	p__Proteobacteria	c__Gammaproteobacteria	o__Enterobacterales	f__Enterobacteriaceae	g__Citrobacter	s__Citrobacter werkmanii	4	0
RS_GCF_001517405.1	d__Bacteria	p__Proteobacteria	c__Gammaproteobacteria	o__Enterobacterales	f__Enterobacteriaceae	g__Erwinia_B	s__Erwinia_B gerundensis	4	0
RS_GCF_900116535.1	d__Bacteria	p__Proteobacteria	c__Gammaproteobacteria	o__Enterobacterales	f__Enterobacteriaceae	g__Kosakonia	s__Kosakonia arachidis	4	0
RS_GCF_900094925.1	d__Bacteria	p__Proteobacteria	c__Gammaproteobacteria	o__Enterobacterales	f__Enterobacteriaceae	g__Kosakonia	s__Kosakonia oryzendophytica	4	0
RS_GCF_900094795.1	d__Bacteria	p__Proteobacteria	c__Gammaproteobacteria	o__Enterobacterales	f__Enterobacteriaceae	g__Kosakonia	s__Kosakonia oryziphila	4	0
RS_GCF_000813585.1	d__Bacteria	p__Proteobacteria	c__Gammaproteobacteria	o__Enterobacterales	f__Enterobacteriaceae	g__Leclercia	s__Leclercia adecarboxylata_A	4	0
GB_GCA_002360945.1	d__Bacteria	p__Proteobacteria	c__Gammaproteobacteria	o__Enterobacterales	f__Enterobacteriaceae	g__Leclercia	s__Leclercia adecarboxylata_B	4	0
GB_GCA_002455995.1	d__Bacteria	p__Proteobacteria	c__Gammaproteobacteria	o__Enterobacterales	f__Enterobacteriaceae	g__Leclercia	s__Leclercia adecarboxylata_C	4	0
RS_GCF_001856865.2	d__Bacteria	p__Proteobacteria	c__Gammaproteobacteria	o__Enterobacterales	f__Enterobacteriaceae	g__Metakosakonia	s__Metakosakonia intestini	4	0
GB_GCA_002377245.1	d__Bacteria	p__Proteobacteria	c__Gammaproteobacteria	o__Enterobacterales	f__Enterobacteriaceae	g__Metakosakonia	s__Metakosakonia sp002377245	4	0
RS_GCF_900112785.1	d__Bacteria	p__Proteobacteria	c__Gammaproteobacteria	o__Enterobacterales	f__Enterobacteriaceae	g__Metakosakonia	s__Metakosakonia sp900112785	4	0
RS_GCF_900130115.1	d__Bacteria	p__Proteobacteria	c__Gammaproteobacteria	o__Enterobacterales	f__Enterobacteriaceae	g__Nissabacter	s__Nissabacter archeti	4	0
RS_GCF_002858675.1	d__Bacteria	p__Proteobacteria	c__Gammaproteobacteria	o__Enterobacterales	f__Enterobacteriaceae	g__Nissabacter	s__Nissabacter sp002858675	4	0
RS_GCF_002858715.1	d__Bacteria	p__Proteobacteria	c__Gammaproteobacteria	o__Enterobacterales	f__Enterobacteriaceae	g__Nissabacter	s__Nissabacter sp002858715	4	0
RS_GCF_000241955.1	d__Bacteria	p__Proteobacteria	c__Gammaproteobacteria	o__Enterobacterales	f__Enterobacteriaceae	g__Rahnella	s__Rahnella aquatilis	4	0
RS_GCF_000252995.1	d__Bacteria	p__Proteobacteria	c__Gammaproteobacteria	o__Enterobacterales	f__Enterobacteriaceae	g__Salmonella	s__Salmonella bongori	4	0
RS_GCF_900478215.1	d__Bacteria	p__Proteobacteria	c__Gammaproteobacteria	o__Enterobacterales	f__Enterobacteriaceae	g__Salmonella	s__Salmonella enterica_D	4	0
RS_GCF_900187015.1	d__Bacteria	p__Proteobacteria	c__Gammaproteobacteria	o__Enterobacterales	f__Enterobacteriaceae	g__Serratia	s__Serratia ficaria	4	0
RS_GCF_001188485.1	d__Bacteria	p__Proteobacteria	c__Gammaproteobacteria	o__Enterobacterales	f__Enterobacteriaceae	g__Trabulsiella	s__Trabulsiella odontotermitis_A	4	0
RS_GCF_000354175.2	d__Bacteria	p__Proteobacteria	c__Gammaproteobacteria	o__Enterobacterales	f__Vibrionaceae	g__Vibrio	s__Vibrio alginolyticus	4	0
RS_GCF_000189275.1	d__Bacteria	p__Proteobacteria	c__Gammaproteobacteria	o__Enterobacterales	f__Vibrionaceae	g__Vibrio	s__Vibrio sinaloensis_B	4	0
RS_GCF_001467895.1	d__Bacteria	p__Proteobacteria	c__Gammaproteobacteria	o__Legionellales	f__Legionellaceae	g__Tatlockia	s__Tatlockia nautarum	4	0
GB_GCA_002685915.1	d__Bacteria	p__Proteobacteria	c__Gammaproteobacteria	o__Pseudomonadales	f__Marinomonadaceae	g__Marinomonas	s__Marinomonas sp002685915	4	0
RS_GCF_000413855.1	d__Bacteria	p__Proteobacteria	c__Gammaproteobacteria	o__Pseudomonadales	f__Moraxellaceae	g__Acinetobacter	s__Acinetobacter gyllenbergii	4	0
RS_GCF_000400715.1	d__Bacteria	p__Proteobacteria	c__Gammaproteobacteria	o__Pseudomonadales	f__Moraxellaceae	g__Acinetobacter	s__Acinetobacter sp000400715	4	0
RS_GCF_900112375.1	d__Bacteria	p__Proteobacteria	c__Gammaproteobacteria	o__Pseudomonadales	f__Pseudomonadaceae	g__Pseudomonas	s__Pseudomonas citronellolis	4	0
RS_GCF_900103875.1	d__Bacteria	p__Proteobacteria	c__Gammaproteobacteria	o__Pseudomonadales	f__Pseudomonadaceae	g__Pseudomonas_E	s__Pseudomonas_E arsenicoxydans	4	0
RS_GCF_001269555.1	d__Bacteria	p__Proteobacteria	c__Gammaproteobacteria	o__Pseudomonadales	f__Pseudomonadaceae	g__Pseudomonas_E	s__Pseudomonas_E piscium	4	0
RS_GCF_002753995.1	d__Bacteria	p__Proteobacteria	c__Gammaproteobacteria	o__Pseudomonadales	f__Pseudomonadaceae	g__Pseudomonas_E	s__Pseudomonas_E sp002753995	4	0
RS_GCF_000007145.1	d__Bacteria	p__Proteobacteria	c__Gammaproteobacteria	o__Xanthomonadales	f__Xanthomonadaceae	g__Xanthomonas	s__Xanthomonas campestris	4	0
RS_GCF_000739575.1	d__Archaea	p__Halobacterota	c__Halobacteria	o__Halobacteriales	f__Haloferacaceae	g__Halobellus	s__Halobellus rufus	3	0
RS_GCF_900111485.1	d__Archaea	p__Halobacterota	c__Halobacteria	o__Halobacteriales	f__Natrialbaceae	g__Natrinema	s__Natrinema hispanica	3	0
RS_GCF_001426705.1	d__Bacteria	p__Actinobacteriota	c__Actinobacteria	o__Actinomycetales	f__Cellulomonadaceae	g__Cellulomonas	s__Cellulomonas sp001426705	3	0
RS_GCF_003058225.1	d__Bacteria	p__Actinobacteriota	c__Actinobacteria	o__Actinomycetales	f__Cellulomonadaceae	g__Promicromonospora	s__Promicromonospora sp003058225	3	0
RS_GCF_900106035.1	d__Bacteria	p__Actinobacteriota	c__Actinobacteria	o__Jiangellales	f__Jiangellaceae	g__Jiangella	s__Jiangella alba	3	0
RS_GCF_001270745.1	d__Bacteria	p__Actinobacteriota	c__Actinobacteria	o__Jiangellales	f__Jiangellaceae	g__Jiangella	s__Jiangella muralis	3	0
RS_GCF_003236295.1	d__Bacteria	p__Actinobacteriota	c__Actinobacteria	o__Jiangellales	f__Jiangellaceae	g__Jiangella	s__Jiangella sp003236295	3	0
RS_GCF_000716715.1	d__Bacteria	p__Actinobacteriota	c__Actinobacteria	o__Mycobacteriales	f__Micromonosporaceae	g__Dactylosporangium	s__Dactylosporangium aurantiacum	3	0
RS_GCF_000428945.1	d__Bacteria	p__Actinobacteriota	c__Actinobacteria	o__Mycobacteriales	f__Micromonosporaceae	g__Hamadaea	s__Hamadaea tsunoensis	3	0
RS_GCF_000204155.1	d__Bacteria	p__Actinobacteriota	c__Actinobacteria	o__Mycobacteriales	f__Micromonosporaceae	g__Micromonospora	s__Micromonospora maris	3	0
RS_GCF_900090275.1	d__Bacteria	p__Actinobacteriota	c__Actinobacteria	o__Mycobacteriales	f__Micromonosporaceae	g__Micromonospora	s__Micromonospora zamorensis	3	0
RS_GCF_002285795.1	d__Bacteria	p__Actinobacteriota	c__Actinobacteria	o__Mycobacteriales	f__Micromonosporaceae	g__Micromonospora_F	s__Micromonospora_F sp002285795	3	0
RS_GCF_000024545.1	d__Bacteria	p__Actinobacteriota	c__Actinobacteria	o__Mycobacteriales	f__Micromonosporaceae	g__Stackebrandtia	s__Stackebrandtia nassauensis	3	0
RS_GCF_900078685.2	d__Bacteria	p__Actinobacteriota	c__Actinobacteria	o__Mycobacteriales	f__Mycobacteriaceae	g__Mycolicibacter	s__Mycolicibacter icosiumassiliensis	3	0
RS_GCF_900119165.1	d__Bacteria	p__Actinobacteriota	c__Actinobacteria	o__Mycobacteriales	f__Pseudonocardiaceae	g__Amycolatopsis	s__Amycolatopsis australiensis	3	0
RS_GCF_000384295.1	d__Bacteria	p__Actinobacteriota	c__Actinobacteria	o__Mycobacteriales	f__Pseudonocardiaceae	g__Amycolatopsis	s__Amycolatopsis balhimycina	3	0
RS_GCF_002155975.1	d__Bacteria	p__Actinobacteriota	c__Actinobacteria	o__Mycobacteriales	f__Pseudonocardiaceae	g__Amycolatopsis	s__Amycolatopsis kentuckyensis	3	0
RS_GCF_002156005.1	d__Bacteria	p__Actinobacteriota	c__Actinobacteria	o__Mycobacteriales	f__Pseudonocardiaceae	g__Amycolatopsis	s__Amycolatopsis lexingtonensis	3	0
RS_GCF_000220945.1	d__Bacteria	p__Actinobacteriota	c__Actinobacteria	o__Mycobacteriales	f__Pseudonocardiaceae	g__Amycolatopsis	s__Amycolatopsis mediterranei	3	0
RS_GCF_000478275.1	d__Bacteria	p__Actinobacteriota	c__Actinobacteria	o__Mycobacteriales	f__Pseudonocardiaceae	g__Amycolatopsis	s__Amycolatopsis orientalis	3	0
RS_GCF_000695625.1	d__Bacteria	p__Actinobacteriota	c__Actinobacteria	o__Mycobacteriales	f__Pseudonocardiaceae	g__Amycolatopsis	s__Amycolatopsis rifamycinica	3	0
RS_GCF_900105945.1	d__Bacteria	p__Actinobacteriota	c__Actinobacteria	o__Mycobacteriales	f__Pseudonocardiaceae	g__Amycolatopsis	s__Amycolatopsis tolypomycina	3	0
RS_GCF_000716785.1	d__Bacteria	p__Actinobacteriota	c__Actinobacteria	o__Mycobacteriales	f__Pseudonocardiaceae	g__Amycolatopsis	s__Amycolatopsis vancoresmycina	3	0
RS_GCF_900106995.1	d__Bacteria	p__Actinobacteriota	c__Actinobacteria	o__Mycobacteriales	f__Pseudonocardiaceae	g__Saccharopolyspora	s__Saccharopolyspora shandongensis	3	0
RS_GCF_000718025.1	d__Bacteria	p__Actinobacteriota	c__Actinobacteria	o__Streptomycetales	f__Streptomycetaceae	g__Kitasatospora	s__Kitasatospora purpeofusca	3	0
RS_GCF_002846355.1	d__Bacteria	p__Actinobacteriota	c__Actinobacteria	o__Streptomycetales	f__Streptomycetaceae	g__Kitasatospora	s__Kitasatospora sp002846355	3	0
RS_GCF_000963515.1	d__Bacteria	p__Actinobacteriota	c__Actinobacteria	o__Streptomycetales	f__Streptomycetaceae	g__Streptomyces	s__Streptomyces albulus_B	3	0
RS_GCF_000720475.1	d__Bacteria	p__Actinobacteriota	c__Actinobacteria	o__Streptomycetales	f__Streptomycetaceae	g__Streptomyces	s__Streptomyces aureocirculatus	3	0
RS_GCF_002154615.1	d__Bacteria	p__Actinobacteriota	c__Actinobacteria	o__Streptomycetales	f__Streptomycetaceae	g__Streptomyces	s__Streptomyces recifensis	3	0
RS_GCF_000725795.1	d__Bacteria	p__Actinobacteriota	c__Actinobacteria	o__Streptomycetales	f__Streptomycetaceae	g__Streptomyces	s__Streptomyces seoulensis	3	0
RS_GCF_001482415.1	d__Bacteria	p__Actinobacteriota	c__Actinobacteria	o__Streptomycetales	f__Streptomycetaceae	g__Streptomyces	s__Streptomyces silvensis	3	0
RS_GCF_000373625.1	d__Bacteria	p__Actinobacteriota	c__Actinobacteria	o__Streptomycetales	f__Streptomycetaceae	g__Streptomyces	s__Streptomyces sp000373625	3	0
RS_GCF_000377965.1	d__Bacteria	p__Actinobacteriota	c__Actinobacteria	o__Streptomycetales	f__Streptomycetaceae	g__Streptomyces	s__Streptomyces sp000377965	3	0
RS_GCF_000719555.1	d__Bacteria	p__Actinobacteriota	c__Actinobacteria	o__Streptomycetales	f__Streptomycetaceae	g__Streptomyces	s__Streptomyces sp000719555	3	0
RS_GCF_000720185.1	d__Bacteria	p__Actinobacteriota	c__Actinobacteria	o__Streptomycetales	f__Streptomycetaceae	g__Streptomyces	s__Streptomyces sp000720185	3	0
RS_GCF_000721515.1	d__Bacteria	p__Actinobacteriota	c__Actinobacteria	o__Streptomycetales	f__Streptomycetaceae	g__Streptomyces	s__Streptomyces sp000721515	3	0
RS_GCF_001279775.1	d__Bacteria	p__Actinobacteriota	c__Actinobacteria	o__Streptomycetales	f__Streptomycetaceae	g__Streptomyces	s__Streptomyces sp001279775	3	0
RS_GCF_002803155.1	d__Bacteria	p__Actinobacteriota	c__Actinobacteria	o__Streptomycetales	f__Streptomycetaceae	g__Streptomyces	s__Streptomyces sp002803155	3	0
RS_GCF_001552235.1	d__Bacteria	p__Actinobacteriota	c__Actinobacteria	o__Streptosporangiales	f__Streptosporangiaceae	g__Actinomadura_B	s__Actinomadura_B rubrobrunea	3	0
RS_GCF_003002095.1	d__Bacteria	p__Actinobacteriota	c__Actinobacteria	o__Streptosporangiales	f__Streptosporangiaceae	g__Allonocardiopsis	s__Allonocardiopsis opalescens	3	0
RS_GCF_001570605.1	d__Bacteria	p__Actinobacteriota	c__Actinobacteria	o__Streptosporangiales	f__Streptosporangiaceae	g__Herbidospora	s__Herbidospora cretacea	3	0
RS_GCF_001570585.1	d__Bacteria	p__Actinobacteriota	c__Actinobacteria	o__Streptosporangiales	f__Streptosporangiaceae	g__Herbidospora	s__Herbidospora daliensis	3	0
RS_GCF_000511135.2	d__Bacteria	p__Actinobacteriota	c__Actinobacteria	o__Streptosporangiales	f__Streptosporangiaceae	g__Microbispora	s__Microbispora sp000511135	3	0
RS_GCF_001570405.1	d__Bacteria	p__Actinobacteriota	c__Actinobacteria	o__Streptosporangiales	f__Streptosporangiaceae	g__Microtetraspora	s__Microtetraspora niveoalba	3	0
RS_GCF_002529455.1	d__Bacteria	p__Actinobacteriota	c__Actinobacteria	o__Streptosporangiales	f__Streptosporangiaceae	g__Nocardiopsis	s__Nocardiopsis fuscus	3	0
RS_GCF_001942255.1	d__Bacteria	p__Actinobacteriota	c__Actinobacteria	o__Streptosporangiales	f__Streptosporangiaceae	g__Nocardiopsis	s__Nocardiopsis sp001942255	3	0
RS_GCF_000341185.1	d__Bacteria	p__Actinobacteriota	c__Actinobacteria	o__Streptosporangiales	f__Streptosporangiaceae	g__Nocardiopsis_A	s__Nocardiopsis_A chromatogenes	3	0
RS_GCF_000341245.1	d__Bacteria	p__Actinobacteriota	c__Actinobacteria	o__Streptosporangiales	f__Streptosporangiaceae	g__Nocardiopsis_A	s__Nocardiopsis_A halophila	3	0
RS_GCF_900108335.1	d__Bacteria	p__Actinobacteriota	c__Actinobacteria	o__Streptosporangiales	f__Streptosporangiaceae	g__Nonomuraea	s__Nonomuraea solani	3	0
RS_GCF_001083785.1	d__Bacteria	p__Actinobacteriota	c__Actinobacteria	o__Streptosporangiales	f__Streptosporangiaceae	g__Nonomuraea	s__Nonomuraea sp001083785	3	0
RS_GCF_003236395.1	d__Bacteria	p__Actinobacteriota	c__Actinobacteria	o__Streptosporangiales	f__Streptosporangiaceae	g__Nonomuraea	s__Nonomuraea sp003236395	3	0
RS_GCF_001696485.1	d__Bacteria	p__Actinobacteriota	c__Actinobacteria	o__Streptosporangiales	f__Streptosporangiaceae	g__Planobispora	s__Planobispora rosea	3	0
RS_GCF_003236385.1	d__Bacteria	p__Actinobacteriota	c__Actinobacteria	o__Streptosporangiales	f__Streptosporangiaceae	g__Sphaerisporangium	s__Sphaerisporangium sp003236385	3	0
RS_GCF_001552135.1	d__Bacteria	p__Actinobacteriota	c__Actinobacteria	o__Streptosporangiales	f__Streptosporangiaceae	g__Spirillospora	s__Spirillospora chibensis	3	0
RS_GCF_001552195.1	d__Bacteria	p__Actinobacteriota	c__Actinobacteria	o__Streptosporangiales	f__Streptosporangiaceae	g__Spirillospora	s__Spirillospora latina	3	0
RS_GCF_001942465.1	d__Bacteria	p__Actinobacteriota	c__Actinobacteria	o__Streptosporangiales	f__Streptosporangiaceae	g__Spirillospora	s__Spirillospora sp001942465	3	0
RS_GCF_900099985.1	d__Bacteria	p__Actinobacteriota	c__Actinobacteria	o__Streptosporangiales	f__Streptosporangiaceae	g__Thermomonospora_B	s__Thermomonospora_B chromogena	3	0
GB_GCA_003242605.1	d__Bacteria	p__Actinobacteriota	c__Actinobacteria	o__Streptosporangiales	f__Streptosporangiaceae	g__ZC4RG28	s__ZC4RG28 sp003242605	3	0
RS_GCF_000014965.1	d__Bacteria	p__Desulfobacterota	c__Syntrophobacteria	o__Syntrophobacterales	f__Syntrophobacteraceae	g__Syntrophobacter	s__Syntrophobacter fumaroxidans	3	0
GB_GCA_003243885.1	d__Bacteria	p__Dormibacterota	c__Dormibacteria	o__Dormibacterales	f__Dormibacteraceae	g__QHBS01	s__QHBS01 sp003243885	3	0
GB_GCA_003023725.1	d__Bacteria	p__Firmicutes_E	c__Sulfobacillia	o__Sulfobacillales	f__Sulfobacillaceae	g__Sulfobacillus	s__Sulfobacillus benefaciens	3	0
RS_GCF_002903155.1	d__Bacteria	p__Firmicutes_E	c__Sulfobacillia	o__Sulfobacillales	f__Sulfobacillaceae	g__Sulfobacillus	s__Sulfobacillus sp002903155	3	0
RS_GCF_900176145.1	d__Bacteria	p__Firmicutes_E	c__Sulfobacillia	o__Sulfobacillales	f__Sulfobacillaceae	g__Sulfobacillus	s__Sulfobacillus thermosulfidooxidans	3	0
RS_GCF_001280565.1	d__Bacteria	p__Firmicutes_E	c__Sulfobacillia	o__Sulfobacillales	f__Sulfobacillaceae	g__Sulfobacillus	s__Sulfobacillus thermosulfidooxidans_A	3	0
GB_GCA_000237975.1	d__Bacteria	p__Firmicutes_E	c__Sulfobacillia	o__Sulfobacillales	f__Sulfobacillaceae	g__Sulfobacillus_A	s__Sulfobacillus_A acidophilus	3	0
GB_GCA_003023695.1	d__Bacteria	p__Firmicutes_E	c__Sulfobacillia	o__Sulfobacillales	f__Sulfobacillaceae	g__Sulfobacillus_C	s__Sulfobacillus_C benefaciens	3	0
GB_GCA_001899585.1	d__Bacteria	p__Proteobacteria	c__Alphaproteobacteria	o__Acetobacterales	f__Acetobacteraceae	g__70-18	s__70-18 sp001899585	3	0
RS_GCF_000963905.1	d__Bacteria	p__Proteobacteria	c__Alphaproteobacteria	o__Acetobacterales	f__Acetobacteraceae	g__Acetobacter	s__Acetobacter aceti	3	0
RS_GCF_001628715.1	d__Bacteria	p__Proteobacteria	c__Alphaproteobacteria	o__Acetobacterales	f__Acetobacteraceae	g__Acetobacter	s__Acetobacter oryzifermentans	3	0
RS_GCF_003207815.1	d__Bacteria	p__Proteobacteria	c__Alphaproteobacteria	o__Acetobacterales	f__Acetobacteraceae	g__Komagataeibacter	s__Komagataeibacter oboediens	3	0
RS_GCF_003207865.1	d__Bacteria	p__Proteobacteria	c__Alphaproteobacteria	o__Acetobacterales	f__Acetobacteraceae	g__Komagataeibacter	s__Komagataeibacter sucrofermentans	3	0
RS_GCF_003207895.1	d__Bacteria	p__Proteobacteria	c__Alphaproteobacteria	o__Acetobacterales	f__Acetobacteraceae	g__Komagataeibacter	s__Komagataeibacter swingsii	3	0
RS_GCF_003116135.1	d__Bacteria	p__Proteobacteria	c__Alphaproteobacteria	o__Acetobacterales	f__Acetobacteraceae	g__Roseomonas	s__Roseomonas aestuarii	3	0
RS_GCF_000164635.1	d__Bacteria	p__Proteobacteria	c__Alphaproteobacteria	o__Acetobacterales	f__Acetobacteraceae	g__Roseomonas	s__Roseomonas cervicalis	3	0
RS_GCF_001941945.1	d__Bacteria	p__Proteobacteria	c__Alphaproteobacteria	o__Acetobacterales	f__Acetobacteraceae	g__Roseomonas	s__Roseomonas gilardii	3	0
RS_GCF_003130795.1	d__Bacteria	p__Proteobacteria	c__Alphaproteobacteria	o__Azospirillales	f__Azospirillaceae	g__Azospirillum	s__Azospirillum thiophilum_A	3	0
RS_GCF_000016185.1	d__Bacteria	p__Proteobacteria	c__Alphaproteobacteria	o__Azospirillales	f__Azospirillaceae	g__Rhodospirillum_A	s__Rhodospirillum_A centenum	3	0
RS_GCF_000155575.1	d__Bacteria	p__Proteobacteria	c__Alphaproteobacteria	o__Caulobacterales	f__Caulobacteraceae	g__Brevundimonas	s__Brevundimonas sp000155575	3	0
RS_GCF_900167455.1	d__Bacteria	p__Proteobacteria	c__Alphaproteobacteria	o__Reyranellales	f__Reyranellaceae	g__Enhydrobacter	s__Enhydrobacter aerosaccus	3	0
RS_GCF_003258595.1	d__Bacteria	p__Proteobacteria	c__Alphaproteobacteria	o__Rhizobiales	f__Amorphaceae	g__Acuticoccus	s__Acuticoccus sp003258595	3	0
RS_GCF_002220095.1	d__Bacteria	p__Proteobacteria	c__Alphaproteobacteria	o__Rhizobiales	f__Beijerinckiaceae	g__Bosea	s__Bosea sp002220095	3	0
RS_GCF_000364445.1	d__Bacteria	p__Proteobacteria	c__Alphaproteobacteria	o__Rhizobiales	f__Beijerinckiaceae	g__Methylobacterium	s__Methylobacterium mesophilicum	3	0
GB_GCA_003096615.1	d__Bacteria	p__Proteobacteria	c__Alphaproteobacteria	o__Rhizobiales	f__Beijerinckiaceae	g__Methylobacterium	s__Methylobacterium organophilum	3	0
RS_GCF_900103445.1	d__Bacteria	p__Proteobacteria	c__Alphaproteobacteria	o__Rhizobiales	f__Beijerinckiaceae	g__Methylobacterium	s__Methylobacterium phyllostachyos	3	0
RS_GCF_000019945.1	d__Bacteria	p__Proteobacteria	c__Alphaproteobacteria	o__Rhizobiales	f__Beijerinckiaceae	g__Methylobacterium	s__Methylobacterium populi	3	0
GB_GCA_001280155.1	d__Bacteria	p__Proteobacteria	c__Alphaproteobacteria	o__Rhizobiales	f__Beijerinckiaceae	g__Methylobacterium	s__Methylobacterium purpurogeneiscleroticus	3	0
RS_GCF_900114375.1	d__Bacteria	p__Proteobacteria	c__Alphaproteobacteria	o__Rhizobiales	f__Beijerinckiaceae	g__Methylobacterium	s__Methylobacterium salsuginis	3	0
RS_GCF_000333655.1	d__Bacteria	p__Proteobacteria	c__Alphaproteobacteria	o__Rhizobiales	f__Beijerinckiaceae	g__Methylobacterium	s__Methylobacterium sp000333655	3	0
RS_GCF_001423405.1	d__Bacteria	p__Proteobacteria	c__Alphaproteobacteria	o__Rhizobiales	f__Beijerinckiaceae	g__Methylobacterium	s__Methylobacterium sp001423405	3	0
RS_GCF_001542815.1	d__Bacteria	p__Proteobacteria	c__Alphaproteobacteria	o__Rhizobiales	f__Beijerinckiaceae	g__Methylobacterium	s__Methylobacterium sp001542815	3	0
RS_GCF_003201865.1	d__Bacteria	p__Proteobacteria	c__Alphaproteobacteria	o__Rhizobiales	f__Beijerinckiaceae	g__Methylobacterium	s__Methylobacterium sp003201865	3	0
RS_GCF_900103195.1	d__Bacteria	p__Proteobacteria	c__Alphaproteobacteria	o__Rhizobiales	f__Beijerinckiaceae	g__Methylobacterium	s__Methylobacterium sp900103195	3	0
RS_GCF_900112625.1	d__Bacteria	p__Proteobacteria	c__Alphaproteobacteria	o__Rhizobiales	f__Beijerinckiaceae	g__Methylobacterium	s__Methylobacterium sp900112625	3	0
RS_GCF_900129325.1	d__Bacteria	p__Proteobacteria	c__Alphaproteobacteria	o__Rhizobiales	f__Kaistiaceae	g__Kaistia	s__Kaistia soli	3	0
RS_GCF_002088275.1	d__Bacteria	p__Proteobacteria	c__Alphaproteobacteria	o__Rhizobiales	f__Rhizobiaceae	g__Fulvimarina	s__Fulvimarina sp002088275	3	0
RS_GCF_900220975.1	d__Bacteria	p__Proteobacteria	c__Alphaproteobacteria	o__Rhizobiales	f__Rhizobiaceae	g__Mycoplana	s__Mycoplana subbaraonis	3	0
GB_GCA_900470925.1	d__Bacteria	p__Proteobacteria	c__Alphaproteobacteria	o__Rhizobiales	f__Rhizobiaceae	g__Phyllobacterium	s__Phyllobacterium sp900470925	3	0
RS_GCF_000696095.1	d__Bacteria	p__Proteobacteria	c__Alphaproteobacteria	o__Rhizobiales	f__Rhizobiaceae	g__Rhizobium	s__Rhizobium rhizogenes	3	0
GB_GCA_900469475.1	d__Bacteria	p__Proteobacteria	c__Alphaproteobacteria	o__Rhizobiales	f__Rhizobiaceae	g__Rhizobium	s__Rhizobium sp900469475	3	0
RS_GCF_000422785.1	d__Bacteria	p__Proteobacteria	c__Alphaproteobacteria	o__Rhizobiales	f__Stappiaceae	g__Nesiotobacter	s__Nesiotobacter exalbescens	3	0
RS_GCF_000010525.1	d__Bacteria	p__Proteobacteria	c__Alphaproteobacteria	o__Rhizobiales	f__Xanthobacteraceae	g__Azorhizobium	s__Azorhizobium caulinodans	3	0
GB_GCA_900105125.1	d__Bacteria	p__Proteobacteria	c__Alphaproteobacteria	o__Rhizobiales	f__Xanthobacteraceae	g__Bradyrhizobium	s__Bradyrhizobium canariense_A	3	0
RS_GCF_000472865.1	d__Bacteria	p__Proteobacteria	c__Alphaproteobacteria	o__Rhizobiales	f__Xanthobacteraceae	g__Bradyrhizobium	s__Bradyrhizobium elkanii_A	3	0
RS_GCF_900129425.1	d__Bacteria	p__Proteobacteria	c__Alphaproteobacteria	o__Rhizobiales	f__Xanthobacteraceae	g__Bradyrhizobium	s__Bradyrhizobium erythrophlei_C	3	0
RS_GCF_900105845.1	d__Bacteria	p__Proteobacteria	c__Alphaproteobacteria	o__Rhizobiales	f__Xanthobacteraceae	g__Bradyrhizobium	s__Bradyrhizobium erythrophlei_E	3	0
RS_GCF_000472945.1	d__Bacteria	p__Proteobacteria	c__Alphaproteobacteria	o__Rhizobiales	f__Xanthobacteraceae	g__Bradyrhizobium	s__Bradyrhizobium japonicum_D	3	0
RS_GCF_000239815.1	d__Bacteria	p__Proteobacteria	c__Alphaproteobacteria	o__Rhizobiales	f__Xanthobacteraceae	g__Bradyrhizobium	s__Bradyrhizobium sp000239815	3	0
RS_GCF_000472385.1	d__Bacteria	p__Proteobacteria	c__Alphaproteobacteria	o__Rhizobiales	f__Xanthobacteraceae	g__Bradyrhizobium	s__Bradyrhizobium sp000472385	3	0
RS_GCF_000473045.1	d__Bacteria	p__Proteobacteria	c__Alphaproteobacteria	o__Rhizobiales	f__Xanthobacteraceae	g__Bradyrhizobium	s__Bradyrhizobium sp000473045	3	0
RS_GCF_002831585.1	d__Bacteria	p__Proteobacteria	c__Alphaproteobacteria	o__Rhizobiales	f__Xanthobacteraceae	g__Bradyrhizobium	s__Bradyrhizobium sp002831585	3	0
GB_GCA_001189845.1	d__Bacteria	p__Proteobacteria	c__Alphaproteobacteria	o__Rhizobiales	f__Xanthobacteraceae	g__Bradyrhizobium	s__Bradyrhizobium tropiciagri	3	0
RS_GCF_003258805.1	d__Bacteria	p__Proteobacteria	c__Alphaproteobacteria	o__Rhizobiales	f__Xanthobacteraceae	g__Rhodoplanes	s__Rhodoplanes elegans	3	0
RS_GCF_000013365.1	d__Bacteria	p__Proteobacteria	c__Alphaproteobacteria	o__Rhizobiales	f__Xanthobacteraceae	g__Rhodopseudomonas	s__Rhodopseudomonas palustris_J	3	0
RS_GCF_000702385.1	d__Bacteria	p__Proteobacteria	c__Alphaproteobacteria	o__Rhizobiales	f__Xanthobacteraceae	g__Xanthobacter	s__Xanthobacter sp000702385	3	0
RS_GCF_001620265.1	d__Bacteria	p__Proteobacteria	c__Alphaproteobacteria	o__Rhodobacterales	f__Rhodobacteraceae	g__Defluviimonas_B	s__Defluviimonas_B alba	3	0
RS_GCF_003111685.1	d__Bacteria	p__Proteobacteria	c__Alphaproteobacteria	o__Rhodobacterales	f__Rhodobacteraceae	g__Salipiger	s__Salipiger pacifica_A	3	0
RS_GCF_001940525.2	d__Bacteria	p__Proteobacteria	c__Alphaproteobacteria	o__Rhodobacterales	f__Rhodobacteraceae	g__Thioclava	s__Thioclava nitratireducens	3	0
RS_GCF_001519065.1	d__Bacteria	p__Proteobacteria	c__Alphaproteobacteria	o__Sphingomonadales	f__Sphingomonadaceae	g__Novosphingobium	s__Novosphingobium sp001519065	3	0
RS_GCF_000588875.1	d__Bacteria	p__Proteobacteria	c__Alphaproteobacteria	o__Sphingomonadales	f__Sphingomonadaceae	g__Sphingobium	s__Sphingobium sp000588875	3	0
RS_GCF_001563285.1	d__Bacteria	p__Proteobacteria	c__Alphaproteobacteria	o__Sphingomonadales	f__Sphingomonadaceae	g__Sphingobium	s__Sphingobium sp001563285	3	0
RS_GCF_001717955.1	d__Bacteria	p__Proteobacteria	c__Alphaproteobacteria	o__Sphingomonadales	f__Sphingomonadaceae	g__Sphingomonas	s__Sphingomonas panacis	3	0
RS_GCF_001555965.1	d__Bacteria	p__Proteobacteria	c__Alphaproteobacteria	o__Sphingomonadales	f__Sphingomonadaceae	g__Sphingomonas	s__Sphingomonas sp001555965	3	0
GB_GCA_002341825.1	d__Bacteria	p__Proteobacteria	c__Gammaproteobacteria	o__Acidithiobacillales	f__Acidithiobacillaceae	g__Acidithiobacillus	s__Acidithiobacillus sp002341825	3	0
RS_GCF_000203915.1	d__Bacteria	p__Proteobacteria	c__Gammaproteobacteria	o__Burkholderiales	f__Burkholderiaceae	g__Burkholderia	s__Burkholderia ambifaria	3	0
RS_GCF_001443045.1	d__Bacteria	p__Proteobacteria	c__Gammaproteobacteria	o__Burkholderiales	f__Burkholderiaceae	g__Burkholderia	s__Burkholderia ambifaria_A	3	0
RS_GCF_001547525.1	d__Bacteria	p__Proteobacteria	c__Gammaproteobacteria	o__Burkholderiales	f__Burkholderiaceae	g__Burkholderia	s__Burkholderia anthina	3	0
GB_GCA_001883705.1	d__Bacteria	p__Proteobacteria	c__Gammaproteobacteria	o__Burkholderiales	f__Burkholderiaceae	g__Burkholderia	s__Burkholderia catarinensis	3	0
RS_GCF_001411495.1	d__Bacteria	p__Proteobacteria	c__Gammaproteobacteria	o__Burkholderiales	f__Burkholderiaceae	g__Burkholderia	s__Burkholderia cepacia	3	0
RS_GCF_000701165.1	d__Bacteria	p__Proteobacteria	c__Gammaproteobacteria	o__Burkholderiales	f__Burkholderiaceae	g__Burkholderia	s__Burkholderia cepacia_A	3	0
RS_GCF_001039005.1	d__Bacteria	p__Proteobacteria	c__Gammaproteobacteria	o__Burkholderiales	f__Burkholderiaceae	g__Burkholderia	s__Burkholderia cepacia_C	3	0
RS_GCF_000292915.1	d__Bacteria	p__Proteobacteria	c__Gammaproteobacteria	o__Burkholderiales	f__Burkholderiaceae	g__Burkholderia	s__Burkholderia cepacia_D	3	0
RS_GCF_001718835.1	d__Bacteria	p__Proteobacteria	c__Gammaproteobacteria	o__Burkholderiales	f__Burkholderiaceae	g__Burkholderia	s__Burkholderia cepacia_F	3	0
RS_GCF_000959725.1	d__Bacteria	p__Proteobacteria	c__Gammaproteobacteria	o__Burkholderiales	f__Burkholderiaceae	g__Burkholderia	s__Burkholderia gladioli	3	0
RS_GCF_000960995.1	d__Bacteria	p__Proteobacteria	c__Gammaproteobacteria	o__Burkholderiales	f__Burkholderiaceae	g__Burkholderia	s__Burkholderia glumae	3	0
RS_GCF_002097715.1	d__Bacteria	p__Proteobacteria	c__Gammaproteobacteria	o__Burkholderiales	f__Burkholderiaceae	g__Burkholderia	s__Burkholderia mesoacidophila	3	0
RS_GCF_001718555.1	d__Bacteria	p__Proteobacteria	c__Gammaproteobacteria	o__Burkholderiales	f__Burkholderiaceae	g__Burkholderia	s__Burkholderia metallica	3	0
RS_GCF_000732615.1	d__Bacteria	p__Proteobacteria	c__Gammaproteobacteria	o__Burkholderiales	f__Burkholderiaceae	g__Burkholderia	s__Burkholderia paludis	3	0
RS_GCF_001411805.1	d__Bacteria	p__Proteobacteria	c__Gammaproteobacteria	o__Burkholderiales	f__Burkholderiaceae	g__Burkholderia	s__Burkholderia plantarii	3	0
RS_GCF_001532035.1	d__Bacteria	p__Proteobacteria	c__Gammaproteobacteria	o__Burkholderiales	f__Burkholderiaceae	g__Burkholderia	s__Burkholderia pseudomultivorans	3	0
RS_GCF_002099195.1	d__Bacteria	p__Proteobacteria	c__Gammaproteobacteria	o__Burkholderiales	f__Burkholderiaceae	g__Burkholderia	s__Burkholderia puraquae	3	0
RS_GCF_001028665.1	d__Bacteria	p__Proteobacteria	c__Gammaproteobacteria	o__Burkholderiales	f__Burkholderiaceae	g__Burkholderia	s__Burkholderia pyrrocinia	3	0
RS_GCF_001718535.1	d__Bacteria	p__Proteobacteria	c__Gammaproteobacteria	o__Burkholderiales	f__Burkholderiaceae	g__Burkholderia	s__Burkholderia seminalis	3	0
RS_GCF_000687455.2	d__Bacteria	p__Proteobacteria	c__Gammaproteobacteria	o__Burkholderiales	f__Burkholderiaceae	g__Burkholderia	s__Burkholderia sp000687455	3	0
RS_GCF_000949135.1	d__Bacteria	p__Proteobacteria	c__Gammaproteobacteria	o__Burkholderiales	f__Burkholderiaceae	g__Burkholderia	s__Burkholderia sp000949135	3	0
RS_GCF_001522585.2	d__Bacteria	p__Proteobacteria	c__Gammaproteobacteria	o__Burkholderiales	f__Burkholderiaceae	g__Burkholderia	s__Burkholderia sp001522585	3	0
RS_GCF_001524645.2	d__Bacteria	p__Proteobacteria	c__Gammaproteobacteria	o__Burkholderiales	f__Burkholderiaceae	g__Burkholderia	s__Burkholderia sp001524645	3	0
RS_GCF_002223185.1	d__Bacteria	p__Proteobacteria	c__Gammaproteobacteria	o__Burkholderiales	f__Burkholderiaceae	g__Burkholderia	s__Burkholderia sp002223185	3	0
RS_GCF_001742165.1	d__Bacteria	p__Proteobacteria	c__Gammaproteobacteria	o__Burkholderiales	f__Burkholderiaceae	g__Burkholderia	s__Burkholderia stabilis	3	0
RS_GCF_001718955.1	d__Bacteria	p__Proteobacteria	c__Gammaproteobacteria	o__Burkholderiales	f__Burkholderiaceae	g__Burkholderia	s__Burkholderia stagnalis	3	0
RS_GCF_000959245.1	d__Bacteria	p__Proteobacteria	c__Gammaproteobacteria	o__Burkholderiales	f__Burkholderiaceae	g__Burkholderia	s__Burkholderia ubonensis	3	0
RS_GCF_001544755.2	d__Bacteria	p__Proteobacteria	c__Gammaproteobacteria	o__Burkholderiales	f__Burkholderiaceae	g__Caballeronia	s__Caballeronia catudaia	3	0
RS_GCF_000698595.1	d__Bacteria	p__Proteobacteria	c__Gammaproteobacteria	o__Burkholderiales	f__Burkholderiaceae	g__Caballeronia	s__Caballeronia glathei	3	0
[truncated: 11,054 more rows]

## Sheet: qOR2
Genome	Domain	Phylum	Class	Order	Family	Genus	Species	qOR2
[truncated: 931 more rows]

## Sheet: qOR3
Genome	Domain	Phylum	Class	Order	Family	Genus	Species	qOR3
[truncated: 926 more rows]

[truncated: 3 more sheets: qOR4ab, OR-C, OR-N]
